# Supplementary material for: Inhibition of dipeptidyl peptidase-4 ameliorates cardiac ischemia and systolic dysfunction by up-regulating the FGF-2/EGR-1 pathway
Source: PLoS One. 2017 Aug 3;12(8):e0182422. doi: 10.1371/journal.pone.0182422 (PMC5542565; doi:10.1371/journal.pone.0182422)
Supplement: S2 File — DNA microarray data of cardiac tissues of mice fed on a normal chow (NC) (n = 3), high fat diet (HF) (n = 3) and high fat diet+linagliptin (Lina)(n = 3) groups. Data were analyzed by the 2-tailed Student’s t-test. (XLSX) [file pone.0182422.s008.xlsx]

## Sheet: Array data
Narabi_56605	ProbeName	NC1(normalized)	NC2(normalized)	NC5(normalized)	HF1(normalized)	HF2(normalized)	HF3(normalized)	Lina3(normalized)	Lina4(normalized)	Lina5(normalized)	Average mRNA level(NC)	Average mRNA level(HFD)	Average mRNA level(HFD+DPP4i)	Relative mRNA(HFD/NC)	Relative mRNA(HFD+DPP4i/HFD)	log2ratio(HFD/NC)	log2ratio(HFD+DPP4i/HFD)	p-value(HFD/NC)	p-value(HFD+DPP4i/HFD)	NC1(Flag)	NC2(Flag)	NC5(Flag)	HF1(Flag)	HF2(Flag)	HF3(Flag)	Lina3(Flag)	Lina4(Flag)	Lina5(Flag)	Count_A_NC group	Count_A_HFgroup	Count_A_Lina group	ControlType	ProbeID	PrimaryAccession	RefSeqAccession	GenbankAccession	UniGeneID	EntrezGeneID	GeneSymbol	GeneName	EnsemblID	TIGRID	GO	Description	GenomicCoordinates	Cytoband
1	A_30_P01017428	0.192342	0.185235	0.179077	0.171698	0.0923229	0.109387	0.0724037	0.0783523	0.0953464	0.185551	0.12447	0.0820341	0.670809	0.65907	-0.576026	-0.601497	0.141969	0.159083	Detected	Detected	Detected	Detected	Not Detected	Not Detected	Not Detected	Not Detected	Detected	0	2	2	FALSE	A_30_P01017428	chr9:88338621-88338923_F										lincRNA:chr9:88338621-88338923 forward strand	chr9:88338864-88338923	mm|9qE3.1
2	A_30_P01017437	0.0363655	0.0438944	0.277045	0.0450644	0.441581	0.0743818	0.0301381	0.199548	0.297761	0.119102	0.187009	0.175816	1.57016	0.940146	0.650915	-0.0890434	0.693018	0.951903	Not Detected	Not Detected	Detected	Not Detected	Detected	Not Detected	Not Detected	Detected	Detected	2	2	1	FALSE	A_30_P01017437	chr12:81221532-81232030_F										lincRNA:chr12:81221532-81232030 forward strand	chr12:81225954-81226013	mm|12qC3
3	A_30_P01017440	0.0244619	0.0172853	0.0104174	0.022542	0.0300321	0.028183	0.0221941	0.0258305	0.019422	0.0173882	0.026919	0.0224822	1.54812	0.835179	0.630514	-0.259842	0.178524	0.208579	Not Detected	Not Detected	Not Detected	Not Detected	Not Detected	Not Detected	Not Detected	Not Detected	Not Detected	3	3	3	FALSE	A_30_P01017440	chr14:8576576-8624104_R										lincRNA:chr14:8576576-8624104 reverse strand	chr14:8577383-8577324	mm|14qA1
4	A_30_P01017441	0.0127646	0.0107821	0.0107619	0.0232227	0.031257	0.0293024	0.0228765	0.0266954	0.0200796	0.0114362	0.0279274	0.0232172	2.44201	0.831341	1.28807	-0.266488	0.00232709	0.207796	Not Detected	Not Detected	Not Detected	Not Detected	Not Detected	Not Detected	Not Detected	Not Detected	Not Detected	3	3	3	FALSE	A_30_P01017441	chr19:6268793-6276607_F										lincRNA:chr19:6268793-6276607 forward strand	chr19:6276469-6276528	mm|19qA
5	A_30_P01017444	0.0305725	0.0151183	0.0218719	0.0526894	0.0421999	0.0298877	0.0232344	0.0271843	0.0208482	0.0225209	0.0415923	0.0237556	1.84683	0.571154	0.885053	-0.808048	0.0773263	0.0637544	Not Detected	Not Detected	Not Detected	Not Detected	Not Detected	Not Detected	Not Detected	Not Detected	Not Detected	3	3	3	FALSE	A_30_P01017444	chr10:93871635-93873477_F										lincRNA:chr10:93871635-93873477 forward strand	chr10:93871664-93871723	mm|10qC2
6	A_30_P01017445	0.0740596	0.0768411	0.0822862	0.217235	0.0888912	0.107992	0.205215	0.122096	0.261396	0.0777289	0.138039	0.196235	1.77591	1.42159	0.828556	0.507506	0.206612	0.34161	Detected	Detected	Detected	Detected	Not Detected	Not Detected	Detected	Not Detected	Detected	0	2	1	FALSE	A_30_P01017445	chr1:183142656-183163206_R										lincRNA:chr1:183142656-183163206 reverse strand	chr1:183142839-183142780	mm|1qH4
7	A_30_P01017447	0.473221	0.430127	0.449725	1.11952	0.714187	0.762633	0.802973	0.860321	0.620307	0.451024	0.865448	0.7612	1.91885	0.879544	0.940243	-0.185172	0.0413734	0.535433	Detected	Detected	Detected	Detected	Detected	Detected	Detected	Detected	Detected	0	0	0	FALSE	A_30_P01017447	chr4:114018574-114019202_F										lincRNA:chr4:114018574-114019202 forward strand	chr4:114018842-114018901	mm|4qD1
8	A_30_P01017448	0.0140183	0.0318846	0.028539	0.0232145	0.0309088	0.0287694	0.0347196	0.026151	0.045368	0.024814	0.0276309	0.0354129	1.11352	1.28164	0.15513	0.357993	0.604599	0.29049	Not Detected	Not Detected	Not Detected	Not Detected	Not Detected	Not Detected	Not Detected	Not Detected	Not Detected	3	3	3	FALSE	A_30_P01017448	chr16:31607863-31608726_F										lincRNA:chr16:31607863-31608726 forward strand	chr16:31608607-31608666	mm|16qB2
9	A_30_P01017453	0.0417002	0.0505577	0.0512444	0.103346	0.0398502	0.0443807	0.0820364	0.0484522	0.0362668	0.0478341	0.0625256	0.0555851	1.30713	0.888998	0.386407	-0.169747	0.622806	0.84752	Not Detected	Detected	Detected	Detected	Not Detected	Not Detected	Not Detected	Not Detected	Not Detected	1	2	3	FALSE	A_30_P01017453	chr15:92174262-92196074_F										lincRNA:chr15:92174262-92196074 forward strand	chr15:92195960-92196019	mm|15qE3
10	A_30_P01017454	0.0450503	0.0395097	0.0396687	0.0372861	0.0246116	0.0232153	0.0183718	0.0410587	0.0160453	0.0414096	0.028371	0.0251586	0.685132	0.886773	-0.545546	-0.173364	0.106106	0.607235	Not Detected	Not Detected	Not Detected	Not Detected	Not Detected	Not Detected	Not Detected	Not Detected	Not Detected	3	3	3	FALSE	A_30_P01017454	chr4:44197185-44197997_R										lincRNA:chr4:44197185-44197997 reverse strand	chr4:44197905-44197846	mm|4qB1
11	A_30_P01017455	0.00968719	0.0213455	0.00831242	0.0176508	0.023527	0.0222323	0.0176614	0.0203416	0.015077	0.013115	0.0211367	0.0176933	1.61164	0.837089	0.688531	-0.256547	0.18807	0.222925	Not Detected	Not Detected	Not Detected	Not Detected	Not Detected	Not Detected	Not Detected	Not Detected	Not Detected	3	3	3	FALSE	A_30_P01017455	chr8:110197171-110206546_F										lincRNA:chr8:110197171-110206546 forward strand	chr8:110203500-110203559	mm|8qD3
12	A_30_P01017466	0.0220583	0.0111483	0.0111751	0.023826	0.0322353	0.0300497	0.0233478	0.0272841	0.0204958	0.0147939	0.0287037	0.0237092	1.94024	0.825999	0.956233	-0.275788	0.0733144	0.198815	Not Detected	Not Detected	Not Detected	Not Detected	Not Detected	Not Detected	Not Detected	Not Detected	Not Detected	3	3	3	FALSE	A_30_P01017466	chr9:24617562-24625262_F										lincRNA:chr9:24617562-24625262 forward strand	chr9:24620642-24620701	mm|9qA4
13	A_30_P01017468	0.0382905	0.0447559	0.0421633	0.0221279	0.0294506	0.0274679	0.0289827	0.0253346	0.0221982	0.0417366	0.0263488	0.0255052	0.631312	0.967982	-0.663576	-0.0469482	0.0169558	0.800343	Not Detected	Not Detected	Not Detected	Not Detected	Not Detected	Not Detected	Not Detected	Not Detected	Not Detected	3	3	3	FALSE	A_30_P01017468	chr11:87841800-87858725_R										lincRNA:chr11:87841800-87858725 reverse strand	chr11:87845246-87845187	mm|11qC
14	A_30_P01017473	0.0234844	0.0441948	0.0428736	0.0620336	0.0528893	0.0479102	0.0750075	0.094634	0.0602673	0.0368509	0.0542777	0.0766363	1.4729	1.41193	0.558658	0.497669	0.167828	0.107621	Not Detected	Not Detected	Not Detected	Not Detected	Not Detected	Not Detected	Not Detected	Not Detected	Not Detected	3	3	3	FALSE	A_30_P01017473	chr17:26669587-26669907_F										lincRNA:chr17:26669587-26669907 forward strand	chr17:26669801-26669860	mm|17qA3.3
15	A_30_P01017482	0.475029	0.553888	0.485518	0.810136	0.733067	0.672624	0.825871	0.841945	0.793914	0.504811	0.738609	0.820577	1.46314	1.11098	0.549067	0.151827	0.00641403	0.174258	Detected	Detected	Detected	Detected	Detected	Detected	Detected	Detected	Detected	0	0	0	FALSE	A_30_P01017482	chr6:4841700-4847400_R										lincRNA:chr6:4841700-4847400 reverse strand	chr6:4843775-4843716	mm|6qA1
16	A_30_P01017490	0.429614	0.480684	0.462684	1.23195	1.07448	1.12488	0.728622	0.990721	0.890253	0.457661	1.14377	0.869866	2.49917	0.760523	1.32145	-0.394936	7.96545e-05	0.0721785	Detected	Detected	Detected	Detected	Detected	Detected	Detected	Detected	Detected	0	0	0	FALSE	A_30_P01017490	chr8:122807653-122823000_R										lincRNA:chr8:122807653-122823000 reverse strand	chr8:122807786-122807727	mm|8qE1
17	A_30_P01017495	0.110162	0.165958	0.16062	0.294572	0.358464	0.362662	0.5457	0.174572	0.197837	0.14558	0.338566	0.306036	2.32564	0.90392	1.21762	-0.145733	0.0103807	0.581925	Detected	Detected	Detected	Detected	Detected	Detected	Detected	Detected	Detected	0	0	0	FALSE	A_30_P01017495	chr10:39607282-39619520_F										lincRNA:chr10:39607282-39619520 forward strand	chr10:39612377-39612436	mm|10qB1
18	A_30_P01017497	0.0143709	0.00958107	0.00951182	0.0204636	0.0270113	0.0253014	0.0221543	0.0268129	0.0172537	0.0111546	0.0242588	0.0220736	2.17478	0.909924	1.12087	-0.136183	0.012519	0.54014	Not Detected	Not Detected	Not Detected	Not Detected	Not Detected	Not Detected	Not Detected	Not Detected	Not Detected	3	3	3	FALSE	A_30_P01017497	chr19:21653968-21671718_F										lincRNA:chr19:21653968-21671718 forward strand	chr19:21661252-21661311	mm|19qB
19	A_30_P01017503	0.0121118	0.0138486	0.0104021	0.022148	0.0292811	0.0274639	0.0217437	0.025142	0.0191457	0.0121208	0.0262977	0.0220105	2.16963	0.836974	1.11745	-0.256746	0.00280796	0.199888	Not Detected	Not Detected	Not Detected	Not Detected	Not Detected	Not Detected	Not Detected	Not Detected	Not Detected	3	3	3	FALSE	A_30_P01017503	chr16:17833211-17835112_F										lincRNA:chr16:17833211-17835112 forward strand	chr16:17834993-17835052	mm|16qA3
20	A_30_P01017505	0.160703	0.152872	0.14355	0.121806	0.106323	0.0855338	0.0895565	0.130179	0.10987	0.152375	0.104554	0.109869	0.686163	1.05083	-0.543377	0.0715309	0.053348	0.761991	Detected	Detected	Detected	Detected	Not Detected	Not Detected	Not Detected	Detected	Detected	0	2	1	FALSE	A_30_P01017505	chr1:55298349-55308374_R										lincRNA:chr1:55298349-55308374 reverse strand	chr1:55299894-55299835	mm|1qC1.2
21	A_30_P01017506	0.0122344	0.0103133	0.0103846	0.022315	0.0292011	0.0270758	0.0216422	0.0250776	0.0186955	0.0109774	0.0261973	0.0218051	2.38647	0.832342	1.25488	-0.264752	0.00146909	0.18923	Not Detected	Not Detected	Not Detected	Not Detected	Not Detected	Not Detected	Not Detected	Not Detected	Not Detected	3	3	3	FALSE	A_30_P01017506	chr17:87674225-87682154_F										lincRNA:chr17:87674225-87682154 forward strand	chr17:87674577-87674636	mm|17qE4
22	A_30_P01017517	0.0127368	0.0321488	0.0184737	0.0234886	0.0312952	0.0291306	0.0231963	0.0265073	0.0199477	0.0211198	0.0279714	0.0232171	1.32442	0.830029	0.40536	-0.268767	0.325967	0.19396	Not Detected	Not Detected	Not Detected	Not Detected	Not Detected	Not Detected	Not Detected	Not Detected	Not Detected	3	3	3	FALSE	A_30_P01017517	chr4:88602254-88675616_F										lincRNA:chr4:88602254-88675616 forward strand	chr4:88602266-88602325	mm|4qC4
23	A_30_P01017524	0.0126184	0.0103061	0.0103522	0.0256932	0.0299689	0.0279966	0.0691655	0.0465089	0.0193775	0.0110923	0.0278862	0.0450173	2.51403	1.61432	1.33	0.690927	0.000673836	0.446136	Not Detected	Not Detected	Not Detected	Not Detected	Not Detected	Not Detected	Not Detected	Not Detected	Not Detected	3	3	3	FALSE	A_30_P01017524	chr8:93337794-93348869_F										lincRNA:chr8:93337794-93348869 forward strand	chr8:93340828-93340887	mm|8qC5
24	A_30_P01017525	0.855914	0.815364	0.875643	1.50272	1.47378	1.48771	1.47387	1.6208	1.46966	0.848974	1.48807	1.52144	1.75279	1.02243	0.809653	0.0319969	0.000725942	0.579949	Detected	Detected	Detected	Detected	Detected	Detected	Detected	Detected	Detected	0	0	0	FALSE	A_30_P01017525	chrX:98658045-98677545_R										lincRNA:chrX:98658045-98677545 reverse strand	chrX:98674839-98674780	mm|XqD
25	A_30_P01017530	0.0107878	0.00917655	0.0092974	0.0261161	0.0262043	0.0246511	0.0194103	0.0228721	0.0171973	0.00975393	0.0256572	0.0198266	2.63044	0.77275	1.39531	-0.371926	0.000966078	0.078123	Not Detected	Not Detected	Not Detected	Not Detected	Not Detected	Not Detected	Not Detected	Not Detected	Not Detected	3	3	3	FALSE	A_30_P01017530	chrX:50096566-50098135_R										lincRNA:chrX:50096566-50098135 reverse strand	chrX:50098104-50098045	mm|XqA5
26	A_30_P01017535	0.0523579	0.0774482	0.0645599	0.195456	0.126556	0.21873	0.130451	0.193888	0.150875	0.0647887	0.180247	0.158405	2.78208	0.878819	1.47616	-0.186362	0.0103585	0.60075	Not Detected	Detected	Detected	Detected	Not Detected	Detected	Detected	Detected	Detected	1	1	0	FALSE	A_30_P01017535	chr1:92546371-92551596_R										lincRNA:chr1:92546371-92551596 reverse strand	chr1:92549843-92549784	mm|1qD
27	A_30_P01017541	0.0481497	0.0725344	0.0470295	0.0230916	0.030773	0.0286176	0.0320768	0.0312167	0.019167	0.0559045	0.0274941	0.0274868	0.491804	0.999736	-1.02384	-0.000380761	0.0198779	0.924867	Not Detected	Detected	Not Detected	Not Detected	Not Detected	Not Detected	Not Detected	Not Detected	Not Detected	2	3	3	FALSE	A_30_P01017541	chr1:58443698-58449898_F										lincRNA:chr1:58443698-58449898 forward strand	chr1:58444692-58444751	mm|1qC1.3
28	A_30_P01017542	0.0125181	0.0105249	0.0122281	0.0516604	0.0305084	0.0284143	0.0264957	0.0362805	0.0368201	0.011757	0.036861	0.0331988	3.13523	0.900648	1.64857	-0.150965	0.0209598	0.740461	Not Detected	Not Detected	Not Detected	Not Detected	Not Detected	Not Detected	Not Detected	Not Detected	Not Detected	3	3	3	FALSE	A_30_P01017542	chr16:4585697-4594022_F										lincRNA:chr16:4585697-4594022 forward strand	chr16:4593722-4593781	mm|16qA1
29	A_30_P01017544	0.0449085	0.0503858	0.0498144	0.045027	0.0249705	0.0237849	0.0504477	0.0216327	0.0204059	0.0483696	0.0312608	0.0308288	0.64629	0.986181	-0.629746	-0.020075	0.140393	0.873583	Not Detected	Detected	Detected	Not Detected	Not Detected	Not Detected	Not Detected	Not Detected	Not Detected	1	3	3	FALSE	A_30_P01017544	chr1:85300475-85331475_R										lincRNA:chr1:85300475-85331475 reverse strand	chr1:85301169-85301110	mm|1qC5
30	A_30_P01017549	0.00958125	0.0215772	0.0190576	0.0192063	0.02356	0.0241829	0.0208084	0.0203452	0.0466366	0.0167387	0.0223164	0.0292634	1.33322	1.3113	0.414919	0.390994	0.308463	0.550188	Not Detected	Not Detected	Not Detected	Not Detected	Not Detected	Not Detected	Not Detected	Not Detected	Not Detected	3	3	3	FALSE	A_30_P01017549	chr3:95500407-95500904_F										lincRNA:chr3:95500407-95500904 forward strand	chr3:95500451-95500510	mm|3qF2.1
31	A_30_P01017550	0.10767	0.130807	0.133822	0.055456	0.0252694	0.0408568	0.0562426	0.0304339	0.03364	0.1241	0.0405274	0.0401055	0.326571	0.98959	-1.61453	-0.0150965	0.0281405	0.995226	Detected	Detected	Detected	Not Detected	Not Detected	Not Detected	Not Detected	Not Detected	Not Detected	0	3	3	FALSE	A_30_P01017550	chr2:36112819-36114110_F										lincRNA:chr2:36112819-36114110 forward strand	chr2:36113089-36113148	mm|2qB
32	A_30_P01017559	0.0102971	0.0131848	0.0217456	0.054774	0.0253587	0.0238314	0.0266869	0.0266898	0.0162074	0.0150758	0.0346547	0.0231947	2.2987	0.669308	1.20082	-0.579258	0.0830878	0.338731	Not Detected	Not Detected	Not Detected	Not Detected	Not Detected	Not Detected	Not Detected	Not Detected	Not Detected	3	3	3	FALSE	A_30_P01017559	chrX:8898275-8909200_F										lincRNA:chrX:8898275-8909200 forward strand	chrX:8903576-8903635	mm|XqA1.1
33	A_30_P01017560	0.177003	0.164803	0.120999	0.507418	0.429006	0.398324	0.269536	0.371484	0.252983	0.154268	0.444916	0.298001	2.88404	0.669791	1.52809	-0.578217	0.00304341	0.0534567	Detected	Detected	Detected	Detected	Detected	Detected	Detected	Detected	Detected	0	0	0	FALSE	A_30_P01017560	chr4:12050675-12066450_R										lincRNA:chr4:12050675-12066450 reverse strand	chr4:12051619-12051560	mm|4qA1
34	A_30_P01017561	0.0125666	0.00909616	0.0165895	0.019677	0.0258781	0.0247556	0.0195752	0.0224305	0.0164134	0.0127507	0.0234369	0.019473	1.83808	0.83087	0.878202	-0.267306	0.0491085	0.207588	Not Detected	Not Detected	Not Detected	Not Detected	Not Detected	Not Detected	Not Detected	Not Detected	Not Detected	3	3	3	FALSE	A_30_P01017561	chr13:65588708-65589300_F										lincRNA:chr13:65588708-65589300 forward strand	chr13:65588748-65588807	mm|13qB3
35	A_30_P01017564	1.23442	0.785412	0.769962	0.0830061	0.0392749	0.0472051	0.0700986	0.0815296	0.166145	0.929931	0.0564954	0.105925	0.0607522	1.87492	-4.04092	0.906832	0.000900612	0.15874	Detected	Detected	Detected	Not Detected	Not Detected	Not Detected	Not Detected	Not Detected	Detected	0	3	2	FALSE	A_30_P01017564	chr3:58118325-58136550_F										lincRNA:chr3:58118325-58136550 forward strand	chr3:58125111-58125170	mm|3qD
36	A_30_P01017575	0.0119915	0.0101462	0.010306	0.0217716	0.0290305	0.0274005	0.0216014	0.0249899	0.0190509	0.0108146	0.0260675	0.0218807	2.41041	0.839385	1.26928	-0.252596	0.00235802	0.215104	Not Detected	Not Detected	Not Detected	Not Detected	Not Detected	Not Detected	Not Detected	Not Detected	Not Detected	3	3	3	FALSE	A_30_P01017575	chr9:51905799-51906277_F										lincRNA:chr9:51905799-51906277 forward strand	chr9:51906024-51906083	mm|9qA5.3
37	A_30_P01017581	0.0098022	0.0094469	0.00840797	0.0178251	0.0236899	0.0224017	0.0177735	0.0205091	0.0152688	0.00921903	0.0213056	0.0178505	2.31105	0.837831	1.20855	-0.255268	0.00328453	0.22018	Not Detected	Not Detected	Not Detected	Not Detected	Not Detected	Not Detected	Not Detected	Not Detected	Not Detected	3	3	3	FALSE	A_30_P01017581	chrX:120562611-120780555_R										lincRNA:chrX:120562611-120780555 reverse strand	chrX:120562981-120562922	mm|XqE3
38	A_30_P01017582	0.049664	0.0619036	0.0578783	0.0753252	0.0411445	0.0500734	0.0584544	0.0599513	0.0298214	0.056482	0.0555144	0.049409	0.982869	0.890022	-0.0249289	-0.168087	0.828142	0.674239	Not Detected	Detected	Detected	Not Detected	Not Detected	Not Detected	Not Detected	Not Detected	Not Detected	1	3	3	FALSE	A_30_P01017582	chr7:137486825-137498500_F										lincRNA:chr7:137486825-137498500 forward strand	chr7:137495421-137495480	mm|7qF3
39	A_30_P01017586	0.0611644	0.0689429	0.057366	0.0787645	0.0281525	0.287384	0.0208284	0.0473562	0.0419074	0.0624911	0.131434	0.0366973	2.10324	0.279208	1.07261	-1.84059	0.678755	0.307613	Detected	Detected	Detected	Not Detected	Not Detected	Detected	Not Detected	Not Detected	Not Detected	0	2	3	FALSE	A_30_P01017586	chr4:12159175-12175725_R										lincRNA:chr4:12159175-12175725 reverse strand	chr4:12161943-12161884	mm|4qA1
40	A_30_P01017587	0.992241	0.954049	0.96897	1.45124	1.50567	1.44439	1.46503	1.67559	1.4002	0.971753	1.4671	1.51361	1.50975	1.0317	0.594306	0.0450226	2.21572e-05	0.654501	Detected	Detected	Detected	Detected	Detected	Detected	Detected	Detected	Detected	0	0	0	FALSE	A_30_P01017587	chr5:106982442-107045717_F										lincRNA:chr5:106982442-107045717 forward strand	chr5:107006699-107006758	mm|5qE5
41	A_30_P01017589	0.0121728	0.0213788	0.0112174	0.0222292	0.0295221	0.0273859	0.0218698	0.0329183	0.0288773	0.014923	0.0263791	0.0278885	1.76768	1.05722	0.821856	0.0802755	0.0798165	0.760285	Not Detected	Not Detected	Not Detected	Not Detected	Not Detected	Not Detected	Not Detected	Not Detected	Not Detected	3	3	3	FALSE	A_30_P01017589	chr6:36765550-36793825_F										lincRNA:chr6:36765550-36793825 forward strand	chr6:36788371-36788430	mm|6qB1
42	A_30_P01017595	0.0298	0.0480947	0.0181697	0.027863	0.0518828	0.0404343	0.038667	0.0535061	0.0355257	0.0320215	0.04006	0.0425663	1.25104	1.06256	0.323124	0.0875472	0.472254	0.747606	Not Detected	Not Detected	Not Detected	Not Detected	Not Detected	Not Detected	Not Detected	Not Detected	Not Detected	3	3	3	FALSE	A_30_P01017595	chr12:116850878-116855932_R										lincRNA:chr12:116850878-116855932 reverse strand	chr12:116855798-116855739	mm|12qF2
43	A_30_P01017599	0.0127579	0.0153634	0.0109852	0.0236386	0.327131	0.0297737	0.0237713	0.0271119	0.0197646	0.0130355	0.126848	0.0235493	9.73093	0.18565	3.28258	-2.42934	0.203553	0.369457	Not Detected	Not Detected	Not Detected	Not Detected	Detected	Not Detected	Not Detected	Not Detected	Not Detected	3	2	3	FALSE	A_30_P01017599	chr1:135061034-135070387_F										lincRNA:chr1:135061034-135070387 forward strand	chr1:135070328-135070387	mm|1qE4
44	A_30_P01017601	0.0519254	0.057793	0.0792744	0.198066	0.0385114	0.0717126	0.167432	0.109965	0.070754	0.0629976	0.102763	0.11605	1.63122	1.1293	0.705955	0.175426	0.624494	0.628143	Not Detected	Detected	Detected	Detected	Not Detected	Not Detected	Detected	Not Detected	Not Detected	1	2	2	FALSE	A_30_P01017601	chr16:11032048-11036671_F										lincRNA:chr16:11032048-11036671 forward strand	chr16:11036612-11036671	mm|16qA1
45	A_30_P01017605	0.0356486	0.0509307	0.0392227	0.213874	0.120553	0.114717	0.122869	0.100281	0.0942136	0.041934	0.149714	0.105788	3.57024	0.706599	1.83602	-0.501037	0.0113953	0.255669	Not Detected	Detected	Not Detected	Detected	Not Detected	Not Detected	Detected	Not Detected	Detected	2	2	1	FALSE	A_30_P01017605	chr4:86267450-86277650_F										lincRNA:chr4:86267450-86277650 forward strand	chr4:86272947-86273006	mm|4qC4
46	A_30_P01017607	0.0128604	0.0109018	0.0142025	0.0238014	0.0317827	0.0298204	0.023793	0.0271374	0.0198425	0.0126549	0.0284682	0.023591	2.24958	0.828679	1.16965	-0.271114	0.00242053	0.209576	Not Detected	Not Detected	Not Detected	Not Detected	Not Detected	Not Detected	Not Detected	Not Detected	Not Detected	3	3	3	FALSE	A_30_P01017607	chr3:41327493-41328368_F										lincRNA:chr3:41327493-41328368 forward strand	chr3:41328309-41328368	mm|3qB
47	A_30_P01017610	0.0181911	0.0292737	0.028902	0.0852311	0.0261998	0.0245176	0.0255985	0.0252195	0.0546479	0.0254556	0.0453162	0.0351553	1.7802	0.775778	0.832042	-0.366284	0.41183	0.777451	Not Detected	Not Detected	Not Detected	Not Detected	Not Detected	Not Detected	Not Detected	Not Detected	Not Detected	3	3	3	FALSE	A_30_P01017610	chr10:72559397-72946868_F										lincRNA:chr10:72559397-72946868 forward strand	chr10:72946629-72946688	mm|10qB5.3
48	A_30_P01017617	0.0267507	0.0102838	0.0102951	0.0540969	0.0304938	0.0283022	0.0411625	0.0252633	0.0186184	0.0157765	0.037631	0.0283481	2.38525	0.753317	1.25414	-0.40867	0.0800335	0.396368	Not Detected	Not Detected	Not Detected	Not Detected	Not Detected	Not Detected	Not Detected	Not Detected	Not Detected	3	3	3	FALSE	A_30_P01017617	chr18:77972377-77981443_R										lincRNA:chr18:77972377-77981443 reverse strand	chr18:77981231-77981172	mm|18qE3
49	A_30_P01017619	0.443094	0.435099	0.459842	0.238873	0.146655	0.157422	0.128929	0.141268	0.195527	0.446011	0.180983	0.155241	0.405782	0.857766	-1.30122	-0.221344	0.02488	0.503343	Detected	Detected	Detected	Detected	Detected	Detected	Detected	Detected	Detected	0	0	0	FALSE	A_30_P01017619	chr5:111602486-111603075_F										lincRNA:chr5:111602486-111603075 forward strand	chr5:111602612-111602671	mm|5qF
50	A_30_P01017620	0.0121573	0.0102673	0.010314	0.0221864	0.029003	0.0268613	0.0214574	0.0248494	0.018542	0.0109129	0.0260169	0.0216163	2.38406	0.830855	1.25342	-0.267331	0.00144665	0.1844	Not Detected	Not Detected	Not Detected	Not Detected	Not Detected	Not Detected	Not Detected	Not Detected	Not Detected	3	3	3	FALSE	A_30_P01017620	chr3:27760757-27761151_F										lincRNA:chr3:27760757-27761151 forward strand	chr3:27760905-27760964	mm|3qA3
51	A_30_P01017624	0.0263319	0.0849531	0.0459072	0.0392178	0.0286414	0.0309383	0.0701402	0.0636368	0.0666058	0.0523974	0.0329325	0.0667942	0.628514	2.02822	-0.669983	1.02021	0.399246	0.0116849	Not Detected	Detected	Not Detected	Not Detected	Not Detected	Not Detected	Not Detected	Not Detected	Not Detected	2	3	3	FALSE	A_30_P01017624	chr17:26911397-26917047_R										lincRNA:chr17:26911397-26917047 reverse strand
52	A_30_P01017625	0.26332	0.23132	0.279238	0.460461	0.417081	0.349287	0.330288	0.369963	0.277556	0.257959	0.408943	0.325935	1.5853	0.797019	0.664755	-0.327314	0.012732	0.12229	Detected	Detected	Detected	Detected	Detected	Detected	Detected	Detected	Detected	0	0	0	FALSE	A_30_P01017625	chr7:111526943-111545093_F										lincRNA:chr7:111526943-111545093 forward strand	chr7:111536045-111536104	mm|7qE3
53	A_30_P01017626	0.161703	0.15269	0.106708	0.178301	0.0890419	0.113312	0.0291086	0.0594325	0.0372083	0.140367	0.126885	0.0419165	0.90395	0.330351	-0.145685	-1.59793	0.630964	0.0191052	Detected	Detected	Detected	Detected	Not Detected	Not Detected	Not Detected	Not Detected	Not Detected	0	2	3	FALSE	A_30_P01017626	chr2:128217275-128217972_R										lincRNA:chr2:128217275-128217972 reverse strand	chr2:128217505-128217446	mm|2qF1
54	A_30_P01017627	1.59761	1.57267	1.46924	2.06505	2.79827	2.72874	2.66378	2.75761	2.94833	1.5465	2.53069	2.78991	1.63639	1.10243	0.710518	0.140689	0.0312816	0.392985	Detected	Detected	Detected	Detected	Detected	Detected	Detected	Detected	Detected	0	0	0	FALSE	A_30_P01017627	chr17:26679595-26688270_R										lincRNA:chr17:26679595-26688270 reverse strand	chr17:26680124-26680065	mm|17qA3.3
55	A_30_P01017640	0.0130265	0.0110537	0.0112258	0.0241994	0.0322344	0.0301942	0.0240461	0.0273267	0.020106	0.0117687	0.028876	0.0238263	2.45363	0.825124	1.29492	-0.277316	0.00213813	0.19595	Not Detected	Not Detected	Not Detected	Not Detected	Not Detected	Not Detected	Not Detected	Not Detected	Not Detected	3	3	3	FALSE	A_30_P01017640	chr11:76427968-76435706_R										lincRNA:chr11:76427968-76435706 reverse strand	chr11:76428299-76428240	mm|11qB5
56	A_30_P01017641	0.0160687	0.00994747	0.0241706	0.0218168	0.0288646	0.0269112	0.0213354	0.0248613	0.0199641	0.0167289	0.0258642	0.0220536	1.54608	0.85267	0.628611	-0.22994	0.186825	0.218617	Not Detected	Not Detected	Not Detected	Not Detected	Not Detected	Not Detected	Not Detected	Not Detected	Not Detected	3	3	3	FALSE	A_30_P01017641	chr11:35805295-35817263_R										lincRNA:chr11:35805295-35817263 reverse strand	chr11:35810525-35810466	mm|11qA4
57	A_30_P01017643	0.0685798	0.0513149	0.0709038	0.07544	0.0360892	0.0250334	0.0341132	0.0229077	0.039882	0.0635995	0.0455209	0.032301	0.715743	0.709586	-0.482487	-0.49495	0.313005	0.525861	Detected	Detected	Detected	Not Detected	Not Detected	Not Detected	Not Detected	Not Detected	Not Detected	0	3	3	FALSE	A_30_P01017643	chr16:84702353-84710928_R										lincRNA:chr16:84702353-84710928 reverse strand	chr16:84705966-84705907	mm|16qC3.3
58	A_30_P01017648	0.0098	0.0148032	0.00840582	0.017893	0.0239064	0.0225333	0.017922	0.0205857	0.0151806	0.011003	0.0214443	0.0178961	1.94894	0.83454	0.962693	-0.260948	0.0360462	0.220501	Not Detected	Not Detected	Not Detected	Not Detected	Not Detected	Not Detected	Not Detected	Not Detected	Not Detected	3	3	3	FALSE	A_30_P01017648	chr4:136735305-136735523_F										lincRNA:chr4:136735305-136735523 forward strand	chr4:136735464-136735523	mm|4qD3
59	A_30_P01017653	0.0123166	0.0103303	0.0161893	0.0247832	0.0297637	0.0276385	0.0220904	0.0254062	0.0188709	0.0129454	0.0273951	0.0221225	2.11621	0.807535	1.08148	-0.308403	0.0169828	0.110357	Not Detected	Not Detected	Not Detected	Not Detected	Not Detected	Not Detected	Not Detected	Not Detected	Not Detected	3	3	3	FALSE	A_30_P01017653	chr3:70581406-70614856_R										lincRNA:chr3:70581406-70614856 reverse strand	chr3:70593236-70593177	mm|3qE2
60	A_30_P01017657	0.0605705	0.0766283	0.0767962	0.115404	0.116538	0.128706	0.119961	0.103632	0.0909492	0.0713317	0.120216	0.104847	1.68531	0.87216	0.753011	-0.197335	0.011203	0.210889	Detected	Detected	Detected	Detected	Not Detected	Detected	Detected	Not Detected	Detected	0	1	1	FALSE	A_30_P01017657	chrX:121970356-121970881_R										lincRNA:chrX:121970356-121970881 reverse strand	chrX:121970836-121970777	mm|XqE3
61	A_30_P01017659	0.123315	0.105142	0.161231	0.159766	0.105317	0.109541	0.109142	0.112729	0.13153	0.129896	0.124874	0.1178	0.961341	0.943351	-0.0568804	-0.0841338	0.829177	0.785894	Detected	Detected	Detected	Detected	Not Detected	Not Detected	Detected	Not Detected	Detected	0	2	1	FALSE	A_30_P01017659	chr1:52507374-52514124_R										lincRNA:chr1:52507374-52514124 reverse strand	chr1:52512598-52512539	mm|1qC1.1
62	A_30_P01017660	0.261108	0.254472	0.282445	0.341096	0.714606	0.179302	0.787952	0.199252	0.203138	0.266008	0.411668	0.396781	1.54757	0.963837	0.630009	-0.0531386	0.553971	0.870866	Detected	Detected	Detected	Detected	Detected	Detected	Detected	Detected	Detected	0	0	0	FALSE	A_30_P01017660	chr17:3103174-3114885_R										lincRNA:chr17:3103174-3114885 reverse strand	chr17:3114420-3114361	mm|17qA1
63	A_30_P01017662	0.0120358	0.0100845	0.0102023	0.0218821	0.0377494	0.0267959	0.0214125	0.024621	0.0183825	0.0107742	0.0288091	0.021472	2.67391	0.745319	1.41895	-0.42407	0.0172444	0.222641	Not Detected	Not Detected	Not Detected	Not Detected	Not Detected	Not Detected	Not Detected	Not Detected	Not Detected	3	3	3	FALSE	A_30_P01017662	chr12:21535610-21560351_F										lincRNA:chr12:21535610-21560351 forward strand	chr12:21535822-21535881	mm|12qA1.3
64	A_30_P01017667	0.112573	0.0951217	0.0811504	0.0584505	0.0434136	0.0613276	0.0519103	0.0262952	0.0509244	0.0962818	0.0543972	0.0430433	0.564979	0.791278	-0.82373	-0.337744	0.0167774	0.361336	Detected	Detected	Detected	Not Detected	Not Detected	Not Detected	Not Detected	Not Detected	Not Detected	0	3	3	FALSE	A_30_P01017667	chr17:17142085-17181901_F										lincRNA:chr17:17142085-17181901 forward strand	chr17:17181842-17181901	mm|17qA3.1
65	A_30_P01017669	0.0428345	0.0465002	0.0476011	0.0748376	0.120967	0.0928303	0.166654	0.0611946	0.0578407	0.0456453	0.0962117	0.0952298	2.10781	0.989794	1.07575	-0.0147992	0.0293417	0.773815	Not Detected	Not Detected	Not Detected	Not Detected	Not Detected	Not Detected	Detected	Not Detected	Not Detected	3	3	2	FALSE	A_30_P01017669	chr11:97275905-97310538_F										lincRNA:chr11:97275905-97310538 forward strand	chr11:97280289-97280348	mm|11qD
66	A_30_P01017670	0.0140123	0.0104448	0.07203	0.0228922	0.0305656	0.0288352	0.0230471	0.0287205	0.0194699	0.0321624	0.027431	0.0237458	0.852892	0.865656	-0.229566	-0.208135	0.754383	0.35825	Not Detected	Not Detected	Detected	Not Detected	Not Detected	Not Detected	Not Detected	Not Detected	Not Detected	2	3	3	FALSE	A_30_P01017670	chr13:5506700-5519000_F										lincRNA:chr13:5506700-5519000 forward strand	chr13:5508425-5508484	mm|13qA1
67	A_30_P01017675	0.519811	0.543297	0.497636	0.427852	0.172402	0.110114	0.153496	0.139911	0.153798	0.520248	0.236789	0.149068	0.455147	0.62954	-1.1356	-0.66763	0.139754	0.531176	Detected	Detected	Detected	Detected	Detected	Not Detected	Detected	Detected	Detected	0	1	0	FALSE	A_30_P01017675	chr17:12965849-12968519_F										lincRNA:chr17:12965849-12968519 forward strand	chr17:12968254-12968313	mm|17qA1
68	A_30_P01017679	0.0647422	0.118811	0.142911	0.217871	0.145633	0.104182	0.119063	0.234053	0.196312	0.108822	0.155895	0.183143	1.43258	1.17478	0.518612	0.232391	0.316753	0.5986	Detected	Detected	Detected	Detected	Detected	Not Detected	Detected	Detected	Detected	0	1	0	FALSE	A_30_P01017679	chr18:35985999-35986376_R										lincRNA:chr18:35985999-35986376 reverse strand	chr18:35986299-35986240	mm|18qB2
69	A_30_P01017690	0.110694	0.106213	0.0964189	0.2257	0.219006	0.133071	0.242381	0.152331	0.167279	0.104442	0.192592	0.18733	1.84401	0.972677	0.882847	-0.0399672	0.0686834	0.929503	Detected	Detected	Detected	Detected	Detected	Not Detected	Detected	Detected	Detected	0	1	0	FALSE	A_30_P01017690	chr18:84297418-84297745_R										lincRNA:chr18:84297418-84297745 reverse strand	chr18:84297538-84297479	mm|18qE4
70	A_30_P01017692	0.0169649	0.01109	0.0111566	0.0237361	0.0321368	0.0298584	0.0289213	0.0271837	0.0204217	0.0130705	0.0285771	0.0255089	2.18638	0.892634	1.12855	-0.16386	0.0130938	0.455273	Not Detected	Not Detected	Not Detected	Not Detected	Not Detected	Not Detected	Not Detected	Not Detected	Not Detected	3	3	3	FALSE	A_30_P01017692	chr13:28975118-28977236_R										lincRNA:chr13:28975118-28977236 reverse strand	chr13:28975186-28975127	mm|13qA3.1
71	A_30_P01017694	0.00927687	0.00793325	0.0080125	0.017091	0.0228643	0.0216837	0.0172363	0.0199071	0.014588	0.00840754	0.0205463	0.0172438	2.4438	0.839265	1.28912	-0.252802	0.00266317	0.238612	Not Detected	Not Detected	Not Detected	Not Detected	Not Detected	Not Detected	Not Detected	Not Detected	Not Detected	3	3	3	FALSE	A_30_P01017694	chr10:56151791-56184966_F										lincRNA:chr10:56151791-56184966 forward strand
72	A_30_P01017695	2.19175	2.08163	1.83359	1.67634	1.64055	1.58355	1.67897	1.84926	1.50152	2.03566	1.63348	1.67658	0.802434	1.02639	-0.317546	0.0375767	0.044224	0.74677	Detected	Detected	Detected	Detected	Detected	Detected	Detected	Detected	Detected	0	0	0	FALSE	A_30_P01017695	chr9:43542196-43544496_R										lincRNA:chr9:43542196-43544496 reverse strand	chr9:43542644-43542585	mm|9qA5.1
73	A_30_P01017698	0.428508	0.41612	0.440898	0.697158	0.544225	0.598393	0.571034	0.698758	0.507415	0.428508	0.613259	0.592402	1.43115	0.965991	0.517172	-0.0499188	0.0336307	0.763516	Detected	Detected	Detected	Detected	Detected	Detected	Detected	Detected	Detected	0	0	0	FALSE	A_30_P01017698	chr1:139713316-139913366_R										lincRNA:chr1:139713316-139913366 reverse strand	chr1:139796253-139796194	mm|1qE4
74	A_30_P01017704	0.0498041	0.0741645	0.117532	0.10735	0.121537	0.16356	0.157402	0.234664	0.122722	0.0805003	0.130816	0.171596	1.62503	1.31174	0.700469	0.391479	0.153433	0.338223	Not Detected	Detected	Detected	Detected	Not Detected	Detected	Detected	Detected	Detected	1	1	0	FALSE	A_30_P01017704	chr5:113771679-113771745_F										lincRNA:chr5:113771679-113771745 forward strand	chr5:113771686-113771745	mm|5qF
75	A_30_P01017706	0.0259006	0.0177995	0.0129915	0.0184004	0.0245191	0.0230655	0.0226486	0.0213622	0.0158378	0.0188972	0.021995	0.0199495	1.16393	0.907004	0.219005	-0.140819	0.465097	0.511609	Not Detected	Not Detected	Not Detected	Not Detected	Not Detected	Not Detected	Not Detected	Not Detected	Not Detected	3	3	3	FALSE	A_30_P01017706	chr5:149947200-149979950_R										lincRNA:chr5:149947200-149979950 reverse strand	chr5:149957352-149957293	mm|5qG3
76	A_30_P01017707	0.497209	0.468798	0.460008	0.277577	0.376304	0.15897	0.12055	0.0917931	0.18521	0.475338	0.270951	0.132518	0.570017	0.489085	-0.810924	-1.03184	0.131488	0.10116	Detected	Detected	Detected	Detected	Detected	Detected	Detected	Not Detected	Detected	0	0	1	FALSE	A_30_P01017707	chr3:30077338-30080281_R										lincRNA:chr3:30077338-30080281 reverse strand	chr3:30077398-30077339	mm|3qA3
77	A_30_P01017708	0.0145001	0.0216789	0.00989108	0.0460678	0.0399914	0.0257435	0.0205197	0.0236337	0.0287042	0.0153567	0.0372675	0.0242859	2.42679	0.651663	1.27905	-0.617803	0.0368366	0.130517	Not Detected	Not Detected	Not Detected	Not Detected	Not Detected	Not Detected	Not Detected	Not Detected	Not Detected	3	3	3	FALSE	A_30_P01017708	chr13:94189389-94189810_F										lincRNA:chr13:94189389-94189810 forward strand	chr13:94189751-94189810	mm|13qC3
78	A_30_P01017710	0.0121975	0.0102882	0.0104266	0.0223849	0.0295292	0.0276482	0.0218889	0.0253938	0.0191923	0.0109708	0.0265208	0.0221584	2.4174	0.835509	1.27346	-0.259272	0.00176089	0.197739	Not Detected	Not Detected	Not Detected	Not Detected	Not Detected	Not Detected	Not Detected	Not Detected	Not Detected	3	3	3	FALSE	A_30_P01017710	chr18:36480559-36481146_R										lincRNA:chr18:36480559-36481146 reverse strand	chr18:36480707-36480648	mm|18qB2
79	A_30_P01017712	0.0116428	0.00996404	0.00992294	0.0284415	0.028658	0.0265438	0.0212024	0.0460929	0.0179619	0.0105099	0.0278811	0.028419	2.65284	1.01929	1.40754	0.0275713	0.000642354	0.833045	Not Detected	Not Detected	Not Detected	Not Detected	Not Detected	Not Detected	Not Detected	Not Detected	Not Detected	3	3	3	FALSE	A_30_P01017712	chr15:102100397-102105872_F										lincRNA:chr15:102100397-102105872 forward strand	chr15:102104187-102104246	mm|15qF3
80	A_30_P01017714	4.02889	4.18051	4.1995	4.87533	7.20608	5.9474	6.42889	8.10461	6.21607	4.1363	6.00961	6.91653	1.45289	1.15091	0.538929	0.202777	0.0833755	0.361112	Detected	Detected	Detected	Detected	Detected	Detected	Detected	Detected	Detected	0	0	0	FALSE	A_30_P01017714	chr8:72671462-72672533_F										lincRNA:chr8:72671462-72672533 forward strand	chr8:72672447-72672506	mm|8qB3.3
81	A_30_P01017718	0.0311579	0.0489328	0.0394996	0.0656852	0.0291506	0.0271389	0.0348616	0.0518996	0.0736663	0.0398634	0.0406582	0.0534758	1.01994	1.31525	0.0284819	0.39534	0.885431	0.431401	Not Detected	Not Detected	Not Detected	Not Detected	Not Detected	Not Detected	Not Detected	Not Detected	Not Detected	3	3	3	FALSE	A_30_P01017718	chr11:119797116-119804012_R										lincRNA:chr11:119797116-119804012 reverse strand	chr11:119797226-119797167	mm|11qE2
82	A_30_P01017721	6.39019	5.95254	5.27744	7.31442	13.329	13.8185	14.2053	13.3975	14.826	5.87339	11.4873	14.1429	1.95583	1.23118	0.967778	0.300039	0.0824912	0.354486	Detected	Detected	Detected	Detected	Detected	Detected	Detected	Detected	Detected	0	0	0	FALSE	A_30_P01017721	chr14:44284425-44300475_F										lincRNA:chr14:44284425-44300475 forward strand	chr14:44293351-44293410	mm|14qC1
83	A_30_P01017723	0.0696654	0.0587759	0.0968249	0.112702	0.0630429	0.122233	0.0990577	0.116683	0.0810056	0.0750887	0.0993257	0.0989153	1.32278	0.995869	0.403571	-0.00597265	0.369134	0.921435	Detected	Detected	Detected	Detected	Not Detected	Not Detected	Not Detected	Not Detected	Not Detected	0	2	3	FALSE	A_30_P01017723	chr17:35080914-35090009_R										lincRNA:chr17:35080914-35090009 reverse strand	chr17:35087585-35087526	mm|17qB1
84	A_30_P01017727	0.0100804	0.00850539	0.00855386	0.018094	0.0610999	0.0227594	0.0245744	0.020914	0.0156256	0.00904656	0.0339844	0.0203713	3.75661	0.599431	1.90943	-0.738333	0.084304	0.42017	Not Detected	Not Detected	Not Detected	Not Detected	Not Detected	Not Detected	Not Detected	Not Detected	Not Detected	3	3	3	FALSE	A_30_P01017727	chr12:4579206-4583562_R										lincRNA:chr12:4579206-4583562 reverse strand	chr12:4583523-4583464	mm|12qA1.1
85	A_30_P01017734	0.025828	0.0282427	0.0493283	0.0217302	0.0288922	0.0270621	0.0214333	0.0245579	0.0179244	0.0344663	0.0258948	0.0213052	0.751308	0.822759	-0.412524	-0.281458	0.34629	0.193254	Not Detected	Not Detected	Not Detected	Not Detected	Not Detected	Not Detected	Not Detected	Not Detected	Not Detected	3	3	3	FALSE	A_30_P01017734	chr11:69184157-69201732_F										lincRNA:chr11:69184157-69201732 forward strand	chr11:69196282-69196341	mm|11qB3
86	A_30_P01017735	0.0117483	0.00995798	0.018454	0.051862	0.0450173	0.0266774	0.0794404	0.024781	0.0187117	0.0133868	0.0411855	0.0409777	3.07659	0.994954	1.62133	-0.00729837	0.0151599	0.744423	Not Detected	Not Detected	Not Detected	Not Detected	Not Detected	Not Detected	Not Detected	Not Detected	Not Detected	3	3	3	FALSE	A_30_P01017735	chr6:40693617-40720167_R										lincRNA:chr6:40693617-40720167 reverse strand	chr6:40696441-40696382	mm|6qB1
87	A_30_P01017740	0.0119049	0.00989149	0.0100771	0.0214578	0.0284273	0.0266768	0.0211931	0.024303	0.0187035	0.0106245	0.0255207	0.0213999	2.40206	0.838531	1.26427	-0.254064	0.00178765	0.200715	Not Detected	Not Detected	Not Detected	Not Detected	Not Detected	Not Detected	Not Detected	Not Detected	Not Detected	3	3	3	FALSE	A_30_P01017740	chr3:75451370-75459674_F										lincRNA:chr3:75451370-75459674 forward strand	chr3:75452170-75452229	mm|3qE3
88	A_30_P01017749	0.0294439	0.0201423	0.0141286	0.0689903	0.0236447	0.0224432	0.0178296	0.020497	0.014835	0.0212383	0.0383594	0.0177205	1.80615	0.461961	0.852914	-1.11416	0.324291	0.219385	Not Detected	Not Detected	Not Detected	Not Detected	Not Detected	Not Detected	Not Detected	Not Detected	Not Detected	3	3	3	FALSE	A_30_P01017749	chr1:94077221-94091396_R										lincRNA:chr1:94077221-94091396 reverse strand	chr1:94091010-94090951	mm|1qD
89	A_30_P01017751	0.245502	0.213185	0.199975	0.306146	0.162794	0.112276	0.173884	0.143982	0.211143	0.219554	0.193739	0.176336	0.88242	0.910175	-0.180463	-0.135785	0.552377	0.956088	Detected	Detected	Detected	Detected	Detected	Not Detected	Detected	Detected	Detected	0	1	0	FALSE	A_30_P01017751	chr4:57372663-57377164_R										lincRNA:chr4:57372663-57377164 reverse strand	chr4:57372729-57372670	mm|4qB3
90	A_30_P01017752	0.0714973	0.0760512	0.107251	0.11335	0.119252	0.136309	0.0894204	0.124401	0.0990532	0.0849332	0.122971	0.104291	1.44785	0.848101	0.533912	-0.237692	0.076261	0.219147	Detected	Detected	Detected	Detected	Not Detected	Detected	Not Detected	Detected	Detected	0	1	1	FALSE	A_30_P01017752	chr18:78188082-78194070_F										lincRNA:chr18:78188082-78194070 forward strand	chr18:78194010-78194069	mm|18qE3
91	A_30_P01017754	0.0107461	0.0242319	0.00920261	0.0198554	0.026397	0.0246825	0.0195808	0.0229058	0.0171148	0.0147269	0.023645	0.0198671	1.60557	0.840225	0.683083	-0.251152	0.19573	0.221769	Not Detected	Not Detected	Not Detected	Not Detected	Not Detected	Not Detected	Not Detected	Not Detected	Not Detected	3	3	3	FALSE	A_30_P01017754	chr6:91284617-91285070_R										lincRNA:chr6:91284617-91285070 reverse strand	chr6:91284791-91284732	mm|6qD1
92	A_30_P01017760	1.29893	1.17048	1.1379	1.33102	0.983579	0.976983	0.885507	1.05026	1.0126	1.20244	1.09719	0.982787	0.912474	0.895728	-0.132144	-0.158867	0.435244	0.438735	Detected	Detected	Detected	Detected	Detected	Detected	Detected	Detected	Detected	0	0	0	FALSE	A_30_P01017760	chr17:88993214-89025839_F										lincRNA:chr17:88993214-89025839 forward strand	chr17:89021980-89022039	mm|17qE4
93	A_30_P01017765	0.107656	0.0516449	0.0822081	0.196082	0.100791	0.0749117	0.0672796	0.0884866	0.101608	0.0805031	0.123928	0.0857914	1.53942	0.692269	0.622386	-0.530596	0.337575	0.412799	Detected	Not Detected	Detected	Detected	Not Detected	Not Detected	Not Detected	Not Detected	Detected	1	2	2	FALSE	A_30_P01017765	chr13:29106280-29120376_F										lincRNA:chr13:29106280-29120376 forward strand	chr13:29115533-29115592	mm|13qA3.1
94	A_30_P01017774	0.0887719	0.0927747	0.12556	0.13164	0.0918791	0.183527	0.276294	0.131386	0.128583	0.102369	0.135682	0.178754	1.32542	1.31745	0.406451	0.397746	0.342479	0.485533	Detected	Detected	Detected	Detected	Not Detected	Detected	Detected	Detected	Detected	0	1	0	FALSE	A_30_P01017774	chr18:61781410-61788685_R										lincRNA:chr18:61781410-61788685 reverse strand	chr18:61787727-61787668	mm|18qE1
95	A_30_P01017777	0.100172	0.0845334	0.105763	0.125441	0.0747681	0.0857515	0.0935989	0.125522	0.0939225	0.0968229	0.0953203	0.104348	0.984481	1.09471	-0.0225653	0.130546	0.846679	0.60044	Detected	Detected	Detected	Detected	Not Detected	Not Detected	Not Detected	Not Detected	Not Detected	0	2	3	FALSE	A_30_P01017777	chr5:149931140-149995639_R										lincRNA:chr5:149931140-149995639 reverse strand	chr5:149931208-149931149	mm|5qG3
96	A_30_P01017782	0.0724506	0.0515126	0.0632507	0.120642	0.0847441	0.125759	0.134961	0.133801	0.0778752	0.0624046	0.110382	0.115546	1.76881	1.04678	0.822776	0.0659639	0.0261953	0.899708	Detected	Detected	Detected	Detected	Not Detected	Not Detected	Detected	Detected	Not Detected	0	2	1	FALSE	A_30_P01017782	chr4:41261959-41267670_F										lincRNA:chr4:41261959-41267670 forward strand	chr4:41261998-41262057	mm|4qA5
97	A_30_P01017787	0.00972075	0.00830972	0.00837941	0.020279	0.0236214	0.0224	0.0177255	0.0206267	0.0153621	0.0088033	0.0221001	0.0179048	2.51044	0.810166	1.32794	-0.30371	0.00018812	0.109677	Not Detected	Not Detected	Not Detected	Not Detected	Not Detected	Not Detected	Not Detected	Not Detected	Not Detected	3	3	3	FALSE	A_30_P01017787	chr11:33414450-33450750_R										lincRNA:chr11:33414450-33450750 reverse strand	chr11:33431499-33431440	mm|11qA4
98	A_30_P01017790	0.0821135	0.0768998	0.151775	0.116223	0.168799	0.203838	0.197072	0.433105	0.165671	0.103596	0.162954	0.265282	1.57297	1.62796	0.653489	0.703068	0.160224	0.298616	Detected	Detected	Detected	Detected	Detected	Detected	Detected	Detected	Detected	0	0	0	FALSE	A_30_P01017790	chr1:163508244-163586072_R										lincRNA:chr1:163508244-163586072 reverse strand	chr1:163527731-163527672	mm|1qH2.1
99	A_30_P01017795	0.0468587	0.0387417	0.0736722	0.0910161	0.0957422	0.126787	0.0920604	0.0928244	0.0721386	0.0530909	0.104515	0.0856745	1.96861	0.819733	0.977176	-0.286774	0.0458615	0.218346	Not Detected	Not Detected	Detected	Not Detected	Not Detected	Not Detected	Not Detected	Not Detected	Not Detected	2	3	3	FALSE	A_30_P01017795	chrX:98669962-98670424_F										lincRNA:chrX:98669962-98670424 forward strand	chrX:98670057-98670116	mm|XqD
100	A_30_P01017797	0.00979821	0.00834361	0.0084452	0.0180674	0.0240794	0.0227184	0.0180269	0.0210225	0.0155916	0.00886234	0.0216217	0.0182137	2.43973	0.842378	1.28672	-0.247461	0.00234595	0.235777	Not Detected	Not Detected	Not Detected	Not Detected	Not Detected	Not Detected	Not Detected	Not Detected	Not Detected	3	3	3	FALSE	A_30_P01017797	chr10:21542515-21579890_F										lincRNA:chr10:21542515-21579890 forward strand	chr10:21564917-21564976	mm|10qA3
101	A_30_P01017800	0.0104595	0.00896717	0.00907469	0.0195366	0.0256563	0.0242851	0.0193176	0.0222466	0.016291	0.00950046	0.0231593	0.0192851	2.43771	0.832713	1.28552	-0.264108	0.00196453	0.207559	Not Detected	Not Detected	Not Detected	Not Detected	Not Detected	Not Detected	Not Detected	Not Detected	Not Detected	3	3	3	FALSE	A_30_P01017800	chr1:167215985-167216196_F										lincRNA:chr1:167215985-167216196 forward strand	chr1:167216067-167216126	mm|1qH2.3
102	A_30_P01017803	0.124656	0.122124	0.111678	0.337997	0.263814	0.211469	0.212917	0.200292	0.224939	0.119486	0.271094	0.212716	2.26883	0.784659	1.18195	-0.349863	0.0220365	0.234233	Detected	Detected	Detected	Detected	Detected	Detected	Detected	Detected	Detected	0	0	0	FALSE	A_30_P01017803	chr5:143201822-143204033_R										lincRNA:chr5:143201822-143204033 reverse strand	chr5:143203871-143203812	mm|5qG2
103	A_30_P01017807	0.0800641	0.0908293	0.0990479	0.102148	0.0364556	0.117747	0.163269	0.16194	0.0516143	0.0899804	0.0854501	0.125608	0.949652	1.46996	-0.0745294	0.555773	0.699815	0.516006	Detected	Detected	Detected	Not Detected	Not Detected	Not Detected	Detected	Detected	Not Detected	0	3	1	FALSE	A_30_P01017807	chr2:77807600-77836075_R										lincRNA:chr2:77807600-77836075 reverse strand	chr2:77814209-77814150	mm|2qC3
104	A_30_P01017813	0.0172812	0.0104365	0.010502	0.0222806	0.0309116	0.285885	0.0222738	0.0257689	0.0191156	0.0127399	0.113026	0.0223861	8.87178	0.198062	3.14922	-2.33597	0.189039	0.352623	Not Detected	Not Detected	Not Detected	Not Detected	Not Detected	Detected	Not Detected	Not Detected	Not Detected	3	2	3	FALSE	A_30_P01017813	chr4:135584179-135584625_F										lincRNA:chr4:135584179-135584625 forward strand	chr4:135584311-135584370	mm|4qD3
105	A_30_P01017814	0.0102821	0.00884598	0.00893722	0.0192075	0.025274	0.0240275	0.0190772	0.0219362	0.0159671	0.00935511	0.0228363	0.0189935	2.44105	0.831724	1.2875	-0.265822	0.00215679	0.211293	Not Detected	Not Detected	Not Detected	Not Detected	Not Detected	Not Detected	Not Detected	Not Detected	Not Detected	3	3	3	FALSE	A_30_P01017814	chr1:166985480-166986024_R										lincRNA:chr1:166985480-166986024 reverse strand	chr1:166985650-166985591	mm|1qH2.3
106	A_30_P01017818	0.623675	0.599721	0.580971	0.901015	0.997651	1.18216	1.22284	1.17835	0.803743	0.601456	1.02694	1.06831	1.70743	1.04029	0.771823	0.0569789	0.0167032	0.864811	Detected	Detected	Detected	Detected	Detected	Detected	Detected	Detected	Detected	0	0	0	FALSE	A_30_P01017818	chr16:11008534-11013759_F										lincRNA:chr16:11008534-11013759 forward strand	chr16:11008685-11008744	mm|16qA1
107	A_30_P01017830	0.0116977	0.0440047	0.0389293	0.0444296	0.359571	0.0471986	0.0636526	0.0432588	0.0317222	0.0315439	0.1504	0.0462112	4.76795	0.307256	2.25337	-1.70249	0.222175	0.407868	Not Detected	Detected	Not Detected	Not Detected	Detected	Not Detected	Not Detected	Not Detected	Not Detected	2	2	3	FALSE	A_30_P01017830	chrX:18810088-18814982_R										lincRNA:chrX:18810088-18814982 reverse strand	chrX:18814909-18814850	mm|XqA1.3
108	A_30_P01017833	0.0106727	0.00919325	0.00925237	0.0199147	0.0261489	0.0249695	0.0197728	0.0226386	0.0188374	0.00970611	0.0236777	0.0204163	2.43946	0.862257	1.28656	-0.21381	0.00212549	0.235191	Not Detected	Not Detected	Not Detected	Not Detected	Not Detected	Not Detected	Not Detected	Not Detected	Not Detected	3	3	3	FALSE	A_30_P01017833	chr12:119836655-119984828_R										lincRNA:chr12:119836655-119984828 reverse strand	chr12:119836988-119836929	mm|12qF2
109	A_30_P01017835	0.618696	0.605082	0.576279	1.04622	1.0579	0.985752	0.970734	1.01571	0.787546	0.600019	1.02996	0.924664	1.71654	0.897768	0.779507	-0.155585	5.93255e-05	0.282434	Detected	Detected	Detected	Detected	Detected	Detected	Detected	Detected	Detected	0	0	0	FALSE	A_30_P01017835	chr7:6210340-6229115_F										lincRNA:chr7:6210340-6229115 forward strand	chr7:6211992-6212051	mm|7qA1
110	A_30_P01017845	0.0313618	0.0391105	0.0163513	0.0492157	0.0321677	0.0582307	0.0551165	0.0272689	0.0273199	0.0289412	0.046538	0.0365684	1.60802	0.785775	0.685285	-0.347811	0.192502	0.413762	Not Detected	Not Detected	Not Detected	Not Detected	Not Detected	Not Detected	Not Detected	Not Detected	Not Detected	3	3	3	FALSE	A_30_P01017845	chr11:120097758-120098581_F										lincRNA:chr11:120097758-120098581 forward strand	chr11:120097899-120097958	mm|11qE2
111	A_30_P01017848	0.0123542	0.0103978	0.0120014	0.0225733	0.0590474	0.0277364	0.0449781	0.040788	0.0362149	0.0115845	0.0364523	0.0406604	3.14665	1.11544	1.65382	0.157611	0.0640899	0.575487	Not Detected	Not Detected	Not Detected	Not Detected	Not Detected	Not Detected	Not Detected	Not Detected	Not Detected	3	3	3	FALSE	A_30_P01017848	chr3:93582250-93592950_R										lincRNA:chr3:93582250-93592950 reverse strand	chr3:93584177-93584118	mm|3qF2.1
112	A_30_P01017851	0.244584	0.185956	0.185501	0.341625	0.201644	0.296599	0.294435	0.265558	0.214317	0.205347	0.279956	0.258103	1.36333	0.921943	0.447137	-0.117251	0.198181	0.740512	Detected	Detected	Detected	Detected	Detected	Detected	Detected	Detected	Detected	0	0	0	FALSE	A_30_P01017851	chr9:95295459-95301266_F										lincRNA:chr9:95295459-95301266 forward strand	chr9:95300199-95300258	mm|9qE3.3
113	A_30_P01017852	0.011971	0.0159948	0.0192881	0.0291094	0.0582162	0.0439912	0.0483211	0.0420265	0.0229504	0.0157513	0.0437723	0.037766	2.77896	0.862784	1.47455	-0.212929	0.0189284	0.634654	Not Detected	Not Detected	Not Detected	Not Detected	Not Detected	Not Detected	Not Detected	Not Detected	Not Detected	3	3	3	FALSE	A_30_P01017852	chr8:71495043-71525582_R										lincRNA:chr8:71495043-71525582 reverse strand	chr8:71525543-71525484	mm|8qB3.3
114	A_30_P01017853	0.515156	0.4005	0.500914	1.17039	0.482529	0.441417	0.485928	0.511656	0.459161	0.47219	0.698111	0.485582	1.47845	0.695565	0.564089	-0.523743	0.447675	0.491333	Detected	Detected	Detected	Detected	Detected	Detected	Detected	Detected	Detected	0	0	0	FALSE	A_30_P01017853	chr1:182686731-182709331_F										lincRNA:chr1:182686731-182709331 forward strand	chr1:182687489-182687548	mm|1qH4
115	A_30_P01017854	0.00937957	0.00801157	0.00808056	0.0171809	0.0229611	0.0217624	0.0172856	0.0199546	0.01471	0.00849057	0.0206348	0.0173167	2.43032	0.839201	1.28115	-0.252912	0.00260612	0.234278	Not Detected	Not Detected	Not Detected	Not Detected	Not Detected	Not Detected	Not Detected	Not Detected	Not Detected	3	3	3	FALSE	A_30_P01017854	chr8:15580278-15583962_R										lincRNA:chr8:15580278-15583962 reverse strand	chr8:15580338-15580279	mm|8qA1.1
116	A_30_P01017857	0.0130872	0.0110835	0.0111528	0.0237229	0.0321348	0.0298514	0.0232112	0.0271696	0.0204062	0.0117745	0.0285697	0.0235957	2.42641	0.825898	1.27882	-0.275964	0.00268694	0.19885	Not Detected	Not Detected	Not Detected	Not Detected	Not Detected	Not Detected	Not Detected	Not Detected	Not Detected	3	3	3	FALSE	A_30_P01017857	chr1:59504708-59506348_R										lincRNA:chr1:59504708-59506348 reverse strand	chr1:59505011-59504952	mm|1qC1.3
117	A_30_P01017859	1.23903	1.10935	1.16874	2.26057	2.14111	2.03224	1.95022	2.23928	1.96894	1.17237	2.14464	2.05282	1.82932	0.957183	0.871306	-0.063133	0.0001694	0.459624	Detected	Detected	Detected	Detected	Detected	Detected	Detected	Detected	Detected	0	0	0	FALSE	A_30_P01017859	chr8:106592650-106603525_R										lincRNA:chr8:106592650-106603525 reverse strand	chr8:106595449-106595390	mm|8qD3
118	A_30_P01017864	0.284929	0.261457	0.310315	0.378361	0.165664	0.146944	0.0831146	0.0762122	0.13407	0.285567	0.230323	0.097799	0.806547	0.424617	-0.31017	-1.23577	0.411037	0.098247	Detected	Detected	Detected	Detected	Detected	Detected	Not Detected	Not Detected	Detected	0	0	2	FALSE	A_30_P01017864	chr12:3406750-3425850_R										lincRNA:chr12:3406750-3425850 reverse strand	chr12:3414232-3414173	mm|12qA1.1
119	A_30_P01017865	8.77968	8.23461	8.19913	8.16152	7.09873	8.51758	8.23855	7.13247	6.91707	8.40447	7.92594	7.42936	0.943063	0.937347	-0.084574	-0.0933444	0.388061	0.448394	Detected	Detected	Detected	Detected	Detected	Detected	Detected	Detected	Detected	0	0	0	FALSE	A_30_P01017865	chr6:112552041-112560067_F										lincRNA:chr6:112552041-112560067 forward strand	chr6:112558705-112558764	mm|6qE3
120	A_30_P01017868	0.272627	0.323981	0.29336	0.159809	0.209645	0.207178	0.363726	0.21442	0.198281	0.296656	0.19221	0.258809	0.647924	1.34649	-0.626104	0.429202	0.0206234	0.298338	Detected	Detected	Detected	Detected	Detected	Detected	Detected	Detected	Detected	0	0	0	FALSE	A_30_P01017868	chr2:177789718-177813140_R										lincRNA:chr2:177789718-177813140 reverse strand	chr2:177789778-177789719	mm|2qH4
121	A_30_P01017886	0.0127602	0.0108019	0.0109506	0.0235655	0.0314555	0.0295025	0.0235542	0.0269216	0.0196958	0.0115042	0.0281745	0.0233905	2.44905	0.830203	1.29222	-0.268464	0.00218015	0.212393	Not Detected	Not Detected	Not Detected	Not Detected	Not Detected	Not Detected	Not Detected	Not Detected	Not Detected	3	3	3	FALSE	A_30_P01017886	chr7:28588159-28617009_F										lincRNA:chr7:28588159-28617009 forward strand	chr7:28589875-28589934	mm|7qA3
122	A_30_P01017887	0.135087	0.160237	0.131957	0.2905	0.328085	0.317395	0.278204	0.302703	0.277868	0.142427	0.311993	0.286259	2.19054	0.917515	1.13129	-0.124197	0.00108686	0.140921	Detected	Detected	Detected	Detected	Detected	Detected	Detected	Detected	Detected	0	0	0	FALSE	A_30_P01017887	chr16:25122825-25273475_F										lincRNA:chr16:25122825-25273475 forward strand	chr16:25174966-25175025	mm|16qB1
123	A_30_P01017892	4.1169	4.52457	4.41461	2.93446	3.97998	4.10588	4.57751	4.19635	4.10932	4.35203	3.67344	4.29439	0.844076	1.16904	-0.244556	0.225324	0.231017	0.257395	Detected	Detected	Detected	Detected	Detected	Detected	Detected	Detected	Detected	0	0	0	FALSE	A_30_P01017892	chr8:27912000-27992750_F										lincRNA:chr8:27912000-27992750 forward strand	chr8:27933611-27933670	mm|8qA2
124	A_30_P01017895	2.22336	2.18101	2.47938	0.812753	0.375029	2.36008	0.572172	0.399572	0.681588	2.29458	1.18262	0.551111	0.515397	0.466008	-0.956244	-1.10157	0.219863	0.443363	Detected	Detected	Detected	Detected	Detected	Detected	Detected	Detected	Detected	0	0	0	FALSE	A_30_P01017895	chr1:175654606-175672031_R										lincRNA:chr1:175654606-175672031 reverse strand	chr1:175655105-175655046	mm|1qH3
125	A_30_P01017898	0.00969726	0.00828961	0.0173048	0.0177259	0.0235814	0.0223598	0.017697	0.0205961	0.0269172	0.0117639	0.0212224	0.0217368	1.80402	1.02424	0.851217	0.0345543	0.0901361	0.920213	Not Detected	Not Detected	Not Detected	Not Detected	Not Detected	Not Detected	Not Detected	Not Detected	Not Detected	3	3	3	FALSE	A_30_P01017898	chr1:84947500-85045150_F										lincRNA:chr1:84947500-85045150 forward strand	chr1:85035652-85035711	mm|1qC5
126	A_30_P01017899	0.0285867	0.0372398	0.0452478	0.0370667	0.023614	0.0223994	0.0445178	0.020589	0.0214588	0.0370248	0.0276934	0.0288552	0.747969	1.04195	-0.41895	0.0592905	0.225333	0.997347	Not Detected	Not Detected	Detected	Not Detected	Not Detected	Not Detected	Not Detected	Not Detected	Not Detected	2	3	3	FALSE	A_30_P01017899	chr7:69088784-69089906_R										lincRNA:chr7:69088784-69089906 reverse strand	chr7:69089324-69089265	mm|7qC
127	A_30_P01017900	0.013008	0.0110397	0.0112104	0.0241831	0.0321884	0.0301508	0.024003	0.0272584	0.0201172	0.0117527	0.0288408	0.0237929	2.45397	0.824973	1.29512	-0.277581	0.00211009	0.193437	Not Detected	Not Detected	Not Detected	Not Detected	Not Detected	Not Detected	Not Detected	Not Detected	Not Detected	3	3	3	FALSE	A_30_P01017900	chr4:129488462-129516410_F										lincRNA:chr4:129488462-129516410 forward strand	chr4:129488570-129488629	mm|4qD2.2
128	A_30_P01017903	0.0104747	0.0171747	0.0248548	0.0268808	0.0257684	0.0242513	0.0192516	0.0361799	0.0220214	0.0175014	0.0256335	0.0258176	1.46466	1.00718	0.550561	0.0103266	0.218707	0.889714	Not Detected	Not Detected	Not Detected	Not Detected	Not Detected	Not Detected	Not Detected	Not Detected	Not Detected	3	3	3	FALSE	A_30_P01017903	chr15:100905367-100905654_R										lincRNA:chr15:100905367-100905654 reverse strand	chr15:100905427-100905368	mm|15qF2
129	A_30_P01017906	0.0117613	0.00986277	0.00999311	0.0254411	0.0284552	0.0263924	0.0210672	0.0241603	0.0179663	0.0105391	0.0267629	0.0210646	2.5394	0.787083	1.34449	-0.345411	0.000513922	0.0883512	Not Detected	Not Detected	Not Detected	Not Detected	Not Detected	Not Detected	Not Detected	Not Detected	Not Detected	3	3	3	FALSE	A_30_P01017906	chr4:59093960-59122541_R										lincRNA:chr4:59093960-59122541 reverse strand	chr4:59094020-59093961	mm|4qB3
130	A_30_P01017908	0.0100926	0.0119755	0.00865642	0.0183244	0.0302495	0.0229599	0.0281237	0.0317424	0.0178621	0.0102415	0.0238446	0.0259094	2.32823	1.08659	1.21923	0.119812	0.0124376	0.757968	Not Detected	Not Detected	Not Detected	Not Detected	Not Detected	Not Detected	Not Detected	Not Detected	Not Detected	3	3	3	FALSE	A_30_P01017908	chr15:102926581-102932542_R										lincRNA:chr15:102926581-102932542 reverse strand	chr15:102928815-102928756	mm|15qF3
131	A_30_P01017909	0.0109855	0.0259021	0.00980923	0.0198916	0.0262879	0.0245025	0.0195244	0.0224231	0.0168031	0.0155656	0.0235607	0.0195836	1.51364	0.831197	0.598018	-0.266737	0.234938	0.192414	Not Detected	Not Detected	Not Detected	Not Detected	Not Detected	Not Detected	Not Detected	Not Detected	Not Detected	3	3	3	FALSE	A_30_P01017909	chr1:87374975-87412500_F										lincRNA:chr1:87374975-87412500 forward strand	chr1:87404544-87404603	mm|1qC5
132	A_30_P01017910	0.0121336	0.0102969	0.0104074	0.0301978	0.029819	0.0280801	0.0221608	0.0253492	0.0189326	0.010946	0.0293656	0.0221475	2.68278	0.7542	1.42373	-0.406982	0.000786881	0.0672105	Not Detected	Not Detected	Not Detected	Not Detected	Not Detected	Not Detected	Not Detected	Not Detected	Not Detected	3	3	3	FALSE	A_30_P01017910	chr17:13020750-13033750_R										lincRNA:chr17:13020750-13033750 reverse strand	chr17:13023759-13023700	mm|17qA1
133	A_30_P01017916	0.174449	0.192709	0.231414	0.218121	0.244579	0.148801	0.231732	0.0869565	0.160279	0.199524	0.203834	0.159656	1.0216	0.783265	0.030829	-0.352427	0.97111	0.421169	Detected	Detected	Detected	Detected	Detected	Detected	Detected	Not Detected	Detected	0	0	1	FALSE	A_30_P01017916	chr4:21683562-21694344_R										lincRNA:chr4:21683562-21694344 reverse strand	chr4:21684484-21684425	mm|4qA3
134	A_30_P01017920	1.38001	1.11795	1.37604	1.5135	0.877761	0.868379	1.14427	1.31404	1.13099	1.29134	1.08655	1.19643	0.841412	1.10113	-0.249115	0.138989	0.387797	0.558047	Detected	Detected	Detected	Detected	Detected	Detected	Detected	Detected	Detected	0	0	0	FALSE	A_30_P01017920	chr13:108653722-108654406_R										lincRNA:chr13:108653722-108654406 reverse strand	chr13:108653832-108653773	mm|13qD2.1
135	A_30_P01017927	0.026828	0.0503084	0.0173387	0.0231768	0.0312904	0.0294749	0.022968	0.0267266	0.0200477	0.0314917	0.0279807	0.0232474	0.888511	0.830837	-0.170539	-0.267363	0.932814	0.211806	Not Detected	Not Detected	Not Detected	Not Detected	Not Detected	Not Detected	Not Detected	Not Detected	Not Detected	3	3	3	FALSE	A_30_P01017927	chr17:33372482-33375285_R										lincRNA:chr17:33372482-33375285 reverse strand	chr17:33373109-33373050	mm|17qB1
136	A_30_P01017938	0.010156	0.00869691	0.00880522	0.0189599	0.0250039	0.0236433	0.0188212	0.0217174	0.0158588	0.00921938	0.0225357	0.0187992	2.44438	0.834194	1.28947	-0.261544	0.00207158	0.215558	Not Detected	Not Detected	Not Detected	Not Detected	Not Detected	Not Detected	Not Detected	Not Detected	Not Detected	3	3	3	FALSE	A_30_P01017938	chrX:121520904-121524132_F										lincRNA:chrX:121520904-121524132 forward strand	chrX:121523786-121523845	mm|XqE3
137	A_30_P01017939	0.0820439	0.0629325	0.0703685	0.0362596	0.073989	0.0282697	0.0201467	0.0557662	0.0329028	0.0717816	0.0461728	0.0362719	0.643239	0.78557	-0.636573	-0.348189	0.2064	0.591949	Detected	Detected	Detected	Not Detected	Not Detected	Not Detected	Not Detected	Not Detected	Not Detected	0	3	3	FALSE	A_30_P01017939	chr15:61984389-62102500_R										lincRNA:chr15:61984389-62102500 reverse strand	chr15:62050115-62050056	mm|15qD1
138	A_30_P01017943	0.700813	0.741828	0.755106	0.739947	0.820122	0.88214	1.12047	0.882471	1.36428	0.732582	0.81407	1.12241	1.11123	1.37876	0.152162	0.46337	0.168885	0.120285	Detected	Detected	Detected	Detected	Detected	Detected	Detected	Detected	Detected	0	0	0	FALSE	A_30_P01017943	chr5:105072936-105074001_F										lincRNA:chr5:105072936-105074001 forward strand	chr5:105073810-105073869	mm|5qE5
139	A_30_P01017948	0.0896659	0.0880968	0.125961	0.260361	0.266717	0.188284	0.199344	0.207833	0.178272	0.101241	0.238454	0.195149	2.35531	0.818394	1.23591	-0.289133	0.00606745	0.226182	Detected	Detected	Detected	Detected	Detected	Detected	Detected	Detected	Detected	0	0	0	FALSE	A_30_P01017948	chr12:76744947-76778372_F										lincRNA:chr12:76744947-76778372 forward strand	chr12:76770520-76770579	mm|12qC3
140	A_30_P01017959	0.196812	0.197825	0.216448	0.324484	0.24393	0.174356	0.440419	0.211646	0.156641	0.203695	0.24759	0.269568	1.21549	1.08877	0.281543	0.122698	0.457365	0.960961	Detected	Detected	Detected	Detected	Detected	Detected	Detected	Detected	Detected	0	0	0	FALSE	A_30_P01017959	chr10:87541696-87547421_R										lincRNA:chr10:87541696-87547421 reverse strand	chr10:87542510-87542451	mm|10qC1
141	A_30_P01017963	0.227884	0.209366	0.220185	0.217482	0.140693	0.161663	0.101418	0.101234	0.127064	0.219145	0.173279	0.109906	0.790704	0.63427	-0.33879	-0.656831	0.186121	0.0532078	Detected	Detected	Detected	Detected	Not Detected	Detected	Not Detected	Not Detected	Detected	0	1	2	FALSE	A_30_P01017963	chr1:193755364-193770539_R										lincRNA:chr1:193755364-193770539 reverse strand	chr1:193769008-193768949	mm|1qH6
142	A_30_P01017969	0.317251	0.344867	0.306403	0.448585	0.332717	0.425029	0.35916	0.302509	0.370447	0.32284	0.40211	0.344039	1.24554	0.855583	0.31677	-0.225021	0.134452	0.253825	Detected	Detected	Detected	Detected	Detected	Detected	Detected	Detected	Detected	0	0	0	FALSE	A_30_P01017969	chr1:167797581-167803031_R										lincRNA:chr1:167797581-167803031 reverse strand	chr1:167797868-167797809	mm|1qH2.3
143	A_30_P01017972	0.138472	0.102471	0.112129	0.0979147	0.165796	0.125483	0.172155	0.120208	0.123191	0.117691	0.129731	0.138518	1.10231	1.06773	0.140525	0.0945484	0.670148	0.717015	Detected	Detected	Detected	Not Detected	Detected	Not Detected	Detected	Detected	Detected	0	2	0	FALSE	A_30_P01017972	chr7:144563845-144603732_R										lincRNA:chr7:144563845-144603732 reverse strand	chr7:144568674-144568615	mm|7qF4
144	A_30_P01017973	0.0185521	0.0110369	0.0115725	0.0241859	0.0321721	0.0300978	0.0239466	0.0272233	0.0200981	0.0137205	0.0288186	0.023756	2.1004	0.824329	1.07066	-0.278707	0.0263483	0.191012	Not Detected	Not Detected	Not Detected	Not Detected	Not Detected	Not Detected	Not Detected	Not Detected	Not Detected	3	3	3	FALSE	A_30_P01017973	chr4:124091663-124128538_R										lincRNA:chr4:124091663-124128538 reverse strand	chr4:124128534-124128475	mm|4qD2.2
145	A_30_P01017975	0.18043	0.178535	0.183058	0.255011	0.207151	0.145239	0.217017	0.176889	0.246348	0.180675	0.202467	0.213418	1.12062	1.05409	0.164293	0.0759948	0.646959	0.737194	Detected	Detected	Detected	Detected	Detected	Detected	Detected	Detected	Detected	0	0	0	FALSE	A_30_P01017975	chr4:131738732-131739264_F										lincRNA:chr4:131738732-131739264 forward strand	chr4:131739130-131739189	mm|4qD2.3
146	A_30_P01017978	1.17077	1.02745	1.06591	3.49393	2.69188	2.56137	2.13886	2.56019	2.62505	1.08804	2.91573	2.44137	2.67979	0.83731	1.42212	-0.256167	0.00422826	0.22161	Detected	Detected	Detected	Detected	Detected	Detected	Detected	Detected	Detected	0	0	0	FALSE	A_30_P01017978	chr9:31839533-31840971_R										lincRNA:chr9:31839533-31840971 reverse strand	chr9:31839684-31839625	mm|9qA4
147	A_30_P01017981	0.0103462	0.00884902	0.0089277	0.018897	0.0250443	0.023711	0.0186793	0.0219121	0.0164234	0.00937429	0.0225508	0.0190049	2.4056	0.842761	1.26639	-0.246804	0.00234855	0.227636	Not Detected	Not Detected	Not Detected	Not Detected	Not Detected	Not Detected	Not Detected	Not Detected	Not Detected	3	3	3	FALSE	A_30_P01017981	chr4:128060015-128075590_R										lincRNA:chr4:128060015-128075590 reverse strand	chr4:128060240-128060181	mm|4qD2.2
148	A_30_P01017984	0.301599	0.281696	0.3638	0.402357	0.391983	0.488725	0.366343	0.426719	0.346921	0.315698	0.427688	0.379995	1.35474	0.888485	0.438013	-0.17058	0.0425841	0.277742	Detected	Detected	Detected	Detected	Detected	Detected	Detected	Detected	Detected	0	0	0	FALSE	A_30_P01017984	chr12:17350856-17355179_R										lincRNA:chr12:17350856-17355179 reverse strand	chr12:17351273-17351214	mm|12qA1.1
149	A_30_P01017990	0.0110261	0.00947158	0.00953721	0.0205102	0.0271004	0.0258415	0.0203516	0.0233391	0.0170681	0.0100116	0.024484	0.020253	2.44556	0.82719	1.29016	-0.273709	0.00228005	0.201874	Not Detected	Not Detected	Not Detected	Not Detected	Not Detected	Not Detected	Not Detected	Not Detected	Not Detected	3	3	3	FALSE	A_30_P01017990	chr3:137734560-137740335_F										lincRNA:chr3:137734560-137740335 forward strand	chr3:137734578-137734637	mm|3qG3
150	A_30_P01017996	9.43557	9.15421	9.03842	10.1267	12.422	12.0424	13.1877	16.3334	10.5309	9.2094	11.5304	13.3507	1.25202	1.15787	0.324258	0.211477	0.0684575	0.413629	Detected	Detected	Detected	Detected	Detected	Detected	Detected	Detected	Detected	0	0	0	FALSE	A_30_P01017996	chr17:71242333-71273533_R										lincRNA:chr17:71242333-71273533 reverse strand	chr17:71245915-71245856	mm|17qE1.3
151	A_30_P01017997	0.258743	0.227369	0.28594	0.215689	0.119769	0.159593	0.125609	0.10255	0.16657	0.257351	0.165017	0.131576	0.641215	0.797349	-0.641119	-0.326718	0.095351	0.381221	Detected	Detected	Detected	Detected	Not Detected	Detected	Detected	Not Detected	Detected	0	1	1	FALSE	A_30_P01017997	chr2:176264400-176302925_R										lincRNA:chr2:176264400-176302925 reverse strand	chr2:176289236-176289177	mm|2qH4
152	A_30_P01018000	0.0268807	0.0275805	0.0512431	0.017342	0.0329991	0.0471249	0.0428276	0.0333323	0.0147462	0.0352348	0.0324887	0.030302	0.922063	0.932696	-0.117063	-0.100521	0.768766	0.85875	Not Detected	Not Detected	Detected	Not Detected	Not Detected	Not Detected	Not Detected	Not Detected	Not Detected	2	3	3	FALSE	A_30_P01018000	chr3:88009045-88036270_F										lincRNA:chr3:88009045-88036270 forward strand	chr3:88032531-88032590	mm|3qF1
153	A_30_P01018007	0.0615379	0.010285	0.0263199	0.0223602	0.0294917	0.0276173	0.02187	0.0253524	0.019188	0.0327143	0.0264897	0.0221368	0.80973	0.835675	-0.304487	-0.258986	0.959646	0.197313	Detected	Not Detected	Not Detected	Not Detected	Not Detected	Not Detected	Not Detected	Not Detected	Not Detected	2	3	3	FALSE	A_30_P01018007	chr3:35782698-35789748_F										lincRNA:chr3:35782698-35789748 forward strand	chr3:35789129-35789188	mm|3qB
154	A_30_P01018008	0.0467895	0.0137457	0.00966101	0.0837558	0.0272605	0.0257853	0.0204937	0.0234562	0.0176532	0.0233987	0.0456005	0.0205344	1.94885	0.45031	0.96262	-1.15101	0.291448	0.231223	Not Detected	Not Detected	Not Detected	Not Detected	Not Detected	Not Detected	Not Detected	Not Detected	Not Detected	3	3	3	FALSE	A_30_P01018008	chrX:98680220-98718445_R										lincRNA:chrX:98680220-98718445 reverse strand	chrX:98714533-98714474	mm|XqD
155	A_30_P01018012	0.0612602	0.0459498	0.0527209	0.149845	0.128905	0.105385	0.0999658	0.063378	0.0731326	0.0533103	0.128045	0.0788255	2.40188	0.615608	1.26416	-0.699916	0.00307817	0.0470313	Detected	Detected	Detected	Detected	Detected	Not Detected	Detected	Not Detected	Not Detected	0	1	2	FALSE	A_30_P01018012	chr5:149751979-149808240_R										lincRNA:chr5:149751979-149808240 reverse strand	chr5:149755169-149755110	mm|5qG3
156	A_30_P01018023	0.0360721	0.0264425	0.00879825	0.0358333	0.0248824	0.0233356	0.018571	0.023764	0.0158786	0.023771	0.0280171	0.0194046	1.17863	0.692597	0.237108	-0.529912	0.559236	0.112062	Not Detected	Not Detected	Not Detected	Not Detected	Not Detected	Not Detected	Not Detected	Not Detected	Not Detected	3	3	3	FALSE	A_30_P01018023	chr17:95150800-95180650_F										lincRNA:chr17:95150800-95180650 forward strand	chr17:95167150-95167209	mm|17qE5
157	A_30_P01018024	0.0166682	0.00980715	0.00992715	0.0213302	0.0283881	0.0264601	0.0208424	0.0338992	0.0185056	0.0121342	0.0253928	0.0244158	2.09267	0.961524	1.06534	-0.0566051	0.0311512	0.763064	Not Detected	Not Detected	Not Detected	Not Detected	Not Detected	Not Detected	Not Detected	Not Detected	Not Detected	3	3	3	FALSE	A_30_P01018024	chr2:78761468-78772543_R										lincRNA:chr2:78761468-78772543 reverse strand	chr2:78768175-78768116	mm|2qC3
158	A_30_P01018030	0.686765	0.568778	0.682268	0.838756	0.567623	0.564205	0.707325	0.723455	0.639276	0.645937	0.656861	0.690019	1.01691	1.05048	0.0241956	0.071046	0.986723	0.671912	Detected	Detected	Detected	Detected	Detected	Detected	Detected	Detected	Detected	0	0	0	FALSE	A_30_P01018030	chr2:181650800-181669350_F										lincRNA:chr2:181650800-181669350 forward strand	chr2:181653098-181653157	mm|2qH4
159	A_30_P01018031	0.0105865	0.00899351	0.00902097	0.0421312	0.0298561	0.0302391	0.0188512	0.0452979	0.0268521	0.00953365	0.0340755	0.0303338	3.57423	0.890194	1.83763	-0.167808	0.00249224	0.590874	Not Detected	Not Detected	Not Detected	Not Detected	Not Detected	Not Detected	Not Detected	Not Detected	Not Detected	3	3	3	FALSE	A_30_P01018031	chr18:61784800-61785170_F										lincRNA:chr18:61784800-61785170 forward strand	chr18:61784921-61784980	mm|18qE1
160	A_30_P01018039	7.52663	6.30921	5.83839	20.6018	22.9978	18.5627	16.8433	19.4576	28.2155	6.55808	20.7208	21.5055	3.15958	1.03787	1.65973	0.0536281	0.000356971	0.926829	Detected	Detected	Detected	Detected	Detected	Detected	Detected	Detected	Detected	0	0	0	FALSE	A_30_P01018039	chr16:8738782-8830148_R										lincRNA:chr16:8738782-8830148 reverse strand	chr16:8738972-8738913	mm|16qA1
161	A_30_P01018042	0.0652644	0.0704323	0.0802694	0.140228	0.0660812	0.0245685	0.0453465	0.0559131	0.0581453	0.0719887	0.0769593	0.053135	1.06905	0.690429	0.0963253	-0.534435	0.780624	0.802127	Detected	Detected	Detected	Detected	Not Detected	Not Detected	Not Detected	Not Detected	Not Detected	0	2	3	FALSE	A_30_P01018042	chr10:57549604-57549956_R										lincRNA:chr10:57549604-57549956 reverse strand	chr10:57549877-57549818	mm|10qB4
162	A_30_P01018048	0.0106061	0.00895692	0.0154527	0.0193535	0.0258336	0.0241543	0.0418354	0.0220415	0.021007	0.0116719	0.0231138	0.0282946	1.9803	1.22414	0.985716	0.291774	0.0298877	0.562816	Not Detected	Not Detected	Not Detected	Not Detected	Not Detected	Not Detected	Not Detected	Not Detected	Not Detected	3	3	3	FALSE	A_30_P01018048	chr3:37659958-37665945_F										lincRNA:chr3:37659958-37665945 forward strand	chr3:37665800-37665859	mm|3qB
163	A_30_P01018049	0.021266	0.0245058	0.0196149	0.0661792	0.05456	0.0717856	0.0447099	0.0507472	0.0859791	0.0217955	0.064175	0.0604788	2.94441	0.942404	1.55798	-0.0855818	0.000626453	0.69447	Not Detected	Not Detected	Not Detected	Not Detected	Not Detected	Not Detected	Not Detected	Not Detected	Detected	3	3	2	FALSE	A_30_P01018049	chr12:111617728-111665403_F										lincRNA:chr12:111617728-111665403 forward strand	chr12:111655183-111655242	mm|12qF1
164	A_30_P01018050	0.0839274	0.0638468	0.0706788	0.0198263	0.0261473	0.0251103	0.0197975	0.0226429	0.0352971	0.0728177	0.0236946	0.0259125	0.325397	1.0936	-1.61973	0.129087	0.000689123	0.761023	Detected	Detected	Detected	Not Detected	Not Detected	Not Detected	Not Detected	Not Detected	Not Detected	0	3	3	FALSE	A_30_P01018050	chr13:12915483-12918645_F										lincRNA:chr13:12915483-12918645 forward strand	chr13:12915625-12915684	mm|13qA1
165	A_30_P01018051	0.0400731	0.080018	0.0627836	0.114672	0.0795279	0.114189	0.0400302	0.144896	0.0619754	0.0609583	0.102796	0.0823005	1.68634	0.800618	0.753894	-0.320814	0.0958149	0.451603	Not Detected	Detected	Detected	Detected	Not Detected	Not Detected	Not Detected	Detected	Not Detected	1	2	2	FALSE	A_30_P01018051	chr1:137689555-137692960_R										lincRNA:chr1:137689555-137692960 reverse strand	chr1:137692717-137692658	mm|1qE4
166	A_30_P01018053	0.164244	0.256571	0.259945	1.23115	0.574721	0.652519	0.606265	0.862122	0.680474	0.22692	0.819462	0.716287	3.61124	0.874095	1.85249	-0.194139	0.0160313	0.759628	Detected	Detected	Detected	Detected	Detected	Detected	Detected	Detected	Detected	0	0	0	FALSE	A_30_P01018053	chr15:79709500-79714700_R										lincRNA:chr15:79709500-79714700 reverse strand	chr15:79713527-79713468	mm|15qE1
167	A_30_P01018054	0.0109142	0.00922207	0.0171345	0.0202421	0.0268072	0.0250388	0.0199083	0.0232087	0.0219809	0.0124236	0.0240293	0.0216993	1.93417	0.903034	0.951715	-0.147148	0.0476112	0.384698	Not Detected	Not Detected	Not Detected	Not Detected	Not Detected	Not Detected	Not Detected	Not Detected	Not Detected	3	3	3	FALSE	A_30_P01018054	chr1:57410074-57426723_R										lincRNA:chr1:57410074-57426723 reverse strand	chr1:57415929-57415870	mm|1qC1.3
168	A_30_P01018055	0.199185	0.173406	0.149317	0.182032	0.138626	0.114938	0.12674	0.180499	0.11399	0.173969	0.145199	0.14041	0.834622	0.967019	-0.260805	-0.0483842	0.301398	0.862952	Detected	Detected	Detected	Detected	Detected	Not Detected	Detected	Detected	Detected	0	1	0	FALSE	A_30_P01018055	chr9:66825889-66853614_F										lincRNA:chr9:66825889-66853614 forward strand	chr9:66853415-66853474	mm|9qC
169	A_30_P01018056	480.181	481.166	476.292	529.871	997.398	923.533	914.121	1034.77	989.447	479.213	816.934	979.445	1.70474	1.19893	0.769552	0.261745	0.130264	0.390095	Detected	Detected	Detected	Detected	Detected	Detected	Detected	Detected	Detected	0	0	0	FALSE	A_30_P01018056	chr2:168804720-168854970_R										lincRNA:chr2:168804720-168854970 reverse strand	chr2:168808878-168808819	mm|2qH3
170	A_30_P01018062	0.00971345	0.00827101	0.00835485	0.0178069	0.0238367	0.046492	0.0178898	0.0225855	0.0150469	0.00877977	0.0293785	0.0185074	3.34616	0.629964	1.74251	-0.66666	0.0538318	0.301618	Not Detected	Not Detected	Not Detected	Not Detected	Not Detected	Not Detected	Not Detected	Not Detected	Not Detected	3	3	3	FALSE	A_30_P01018062	chr8:57987539-57988398_F										lincRNA:chr8:57987539-57988398 forward strand	chr8:57988049-57988108	mm|8qB2
171	A_30_P01018067	0.0106565	0.00917816	0.00924311	0.0198874	0.0261099	0.024917	0.019736	0.0228803	0.0166537	0.00969259	0.0236381	0.0197567	2.43878	0.835797	1.28616	-0.258775	0.00211825	0.220284	Not Detected	Not Detected	Not Detected	Not Detected	Not Detected	Not Detected	Not Detected	Not Detected	Not Detected	3	3	3	FALSE	A_30_P01018067	chr10:83399729-83399790_F										lincRNA:chr10:83399729-83399790 forward strand	chr10:83399731-83399790	mm|10qC1
172	A_30_P01018068	0.9042	0.96779	1.00635	0.653124	0.904599	0.7941	0.899293	1.13464	0.879764	0.959448	0.783941	0.971231	0.817075	1.23891	-0.29146	0.30907	0.146813	0.159811	Detected	Detected	Detected	Detected	Detected	Detected	Detected	Detected	Detected	0	0	0	FALSE	A_30_P01018068	chr3:88009045-88036270_F										lincRNA:chr3:88009045-88036270 forward strand	chr3:88033785-88033844	mm|3qF1
173	A_30_P01018073	0.0123024	0.0103286	0.0104888	0.0225411	0.0300175	0.0278716	0.0222332	0.025466	0.0187974	0.0110399	0.0268101	0.0221655	2.42846	0.826762	1.28004	-0.274456	0.00190614	0.195426	Not Detected	Not Detected	Not Detected	Not Detected	Not Detected	Not Detected	Not Detected	Not Detected	Not Detected	3	3	3	FALSE	A_30_P01018073	chr3:93152559-93153151_F										lincRNA:chr3:93152559-93153151 forward strand	chr3:93152751-93152810	mm|3qF2.1
174	A_30_P01018081	0.249101	0.22799	0.240293	0.240389	0.217727	0.262656	0.120046	0.127433	0.164803	0.239128	0.240257	0.137427	1.00472	0.572	0.00680015	-0.805914	0.970175	0.0132494	Detected	Detected	Detected	Detected	Detected	Detected	Detected	Detected	Detected	0	0	0	FALSE	A_30_P01018081	chr4:123572090-123581365_R										lincRNA:chr4:123572090-123581365 reverse strand	chr4:123580938-123580879	mm|4qD2.2
175	A_30_P01018083	1.44326	0.985459	1.13741	2.33254	0.166227	0.17863	0.104903	0.0950506	0.337888	1.18871	0.892467	0.17928	0.750786	0.200882	-0.413525	-2.31558	0.349914	0.374644	Detected	Detected	Detected	Detected	Detected	Detected	Detected	Not Detected	Detected	0	0	1	FALSE	A_30_P01018083	chr1:183951156-183986156_F										lincRNA:chr1:183951156-183986156 forward strand	chr1:183958831-183958890	mm|1qH5
176	A_30_P01018086	0.368684	0.332546	0.36078	0.743714	0.701566	0.718137	0.635998	1.09698	0.534605	0.354004	0.721139	0.755862	2.0371	1.04815	1.02651	0.0678456	0.000235454	0.995012	Detected	Detected	Detected	Detected	Detected	Detected	Detected	Detected	Detected	0	0	0	FALSE	A_30_P01018086	chr2:181663381-181664097_F										lincRNA:chr2:181663381-181664097 forward strand	chr2:181663950-181664009	mm|2qH4
177	A_30_P01018087	0.0501488	0.0508719	0.0807214	0.121861	0.0638298	0.0848826	0.130695	0.132932	0.178617	0.0605807	0.0901911	0.147415	1.48878	1.63447	0.574126	0.708824	0.188668	0.0915696	Not Detected	Detected	Detected	Detected	Not Detected	Not Detected	Detected	Detected	Detected	1	2	0	FALSE	A_30_P01018087	chr15:59966962-59972812_F										lincRNA:chr15:59966962-59972812 forward strand	chr15:59971179-59971238	mm|15qD1
178	A_30_P01018088	0.151725	0.189727	0.147636	0.284907	0.189095	0.241648	0.241472	0.290379	0.229748	0.163029	0.23855	0.253866	1.46324	1.06421	0.549162	0.0897767	0.0685336	0.641443	Detected	Detected	Detected	Detected	Detected	Detected	Detected	Detected	Detected	0	0	0	FALSE	A_30_P01018088	chr11:59189157-59220607_F										lincRNA:chr11:59189157-59220607 forward strand	chr11:59220445-59220504	mm|11qB1.3
179	A_30_P01018095	0.0108303	0.00928163	0.00923714	0.0197199	0.0260179	0.0245258	0.0194041	0.0223951	0.0347771	0.00978303	0.0234212	0.0255254	2.39406	1.08984	1.25946	0.124119	0.00203973	0.775256	Not Detected	Not Detected	Not Detected	Not Detected	Not Detected	Not Detected	Not Detected	Not Detected	Not Detected	3	3	3	FALSE	A_30_P01018095	chrX:11699327-11699881_R										lincRNA:chrX:11699327-11699881 reverse strand	chrX:11699745-11699686	mm|XqA1.1
180	A_30_P01018096	0.0347174	0.0319778	0.0256329	0.0265623	0.0308514	0.028851	0.0228393	0.0261192	0.0192649	0.0307761	0.0287549	0.0227411	0.934326	0.790862	-0.0980014	-0.338503	0.583678	0.0942045	Not Detected	Not Detected	Not Detected	Not Detected	Not Detected	Not Detected	Not Detected	Not Detected	Not Detected	3	3	3	FALSE	A_30_P01018096	chr17:45525567-45526189_R										lincRNA:chr17:45525567-45526189 reverse strand	chr17:45525758-45525699	mm|17qB3
181	A_30_P01018099	0.0128436	0.0108504	0.0108407	0.0233506	0.031433	0.0294272	0.0229585	0.0268208	0.0201809	0.0115116	0.0280703	0.02332	2.43844	0.830774	1.28596	-0.267473	0.00234013	0.20604	Not Detected	Not Detected	Not Detected	Not Detected	Not Detected	Not Detected	Not Detected	Not Detected	Not Detected	3	3	3	FALSE	A_30_P01018099	chr18:63455560-63548085_R										lincRNA:chr18:63455560-63548085 reverse strand	chr18:63480813-63480754	mm|18qE1
182	A_30_P01018102	0.153336	0.193916	0.184322	0.308511	0.288101	0.310078	0.302314	0.289979	0.353215	0.177191	0.30223	0.315169	1.70567	1.04281	0.77034	0.0604785	0.0108102	0.59573	Detected	Detected	Detected	Detected	Detected	Detected	Detected	Detected	Detected	0	0	0	FALSE	A_30_P01018102	chr3:38320928-38341869_F										lincRNA:chr3:38320928-38341869 forward strand	chr3:38338027-38338086	mm|3qB
183	A_30_P01018109	0.011701	0.00991113	0.0100584	0.0213985	0.0284432	0.0265614	0.0208423	0.0246692	0.0186295	0.0105568	0.0254677	0.0213804	2.41244	0.839508	1.27049	-0.252383	0.0021059	0.214721	Not Detected	Not Detected	Not Detected	Not Detected	Not Detected	Not Detected	Not Detected	Not Detected	Not Detected	3	3	3	FALSE	A_30_P01018109	chr8:49237358-49246495_F										lincRNA:chr8:49237358-49246495 forward strand	chr8:49239440-49239499	mm|8qB1.2
184	A_30_P01018110	0.0123258	0.0104118	0.0105594	0.022502	0.030005	0.0278995	0.0218419	0.0258379	0.0195392	0.011099	0.0268022	0.0224063	2.41483	0.835989	1.27192	-0.258444	0.00211028	0.20693	Not Detected	Not Detected	Not Detected	Not Detected	Not Detected	Not Detected	Not Detected	Not Detected	Not Detected	3	3	3	FALSE	A_30_P01018110	chr10:39386908-39390947_F										lincRNA:chr10:39386908-39390947 forward strand	chr10:39390771-39390830	mm|10qB1
185	A_30_P01018111	0.0107239	0.0145548	0.00918591	0.0198537	0.0263614	0.0246465	0.0464533	0.0228661	0.0170556	0.0114882	0.0236206	0.0287916	2.05607	1.21892	1.03989	0.285606	0.0150423	0.745106	Not Detected	Not Detected	Not Detected	Not Detected	Not Detected	Not Detected	Not Detected	Not Detected	Not Detected	3	3	3	FALSE	A_30_P01018111	chr1:52507374-52514124_F										lincRNA:chr1:52507374-52514124 forward strand	chr1:52513142-52513201	mm|1qC1.1
186	A_30_P01018115	0.0322279	0.0127082	0.0260654	0.0204189	0.0267343	0.0251484	0.0200337	0.0231141	0.0171072	0.0236672	0.0241005	0.020085	1.01831	0.833384	0.0261792	-0.262947	0.798317	0.199225	Not Detected	Not Detected	Not Detected	Not Detected	Not Detected	Not Detected	Not Detected	Not Detected	Not Detected	3	3	3	FALSE	A_30_P01018115	chr18:36449530-36456800_R										lincRNA:chr18:36449530-36456800 reverse strand	chr18:36451979-36451920	mm|18qB2
187	A_30_P01018116	0.0945356	0.12864	0.133528	0.0913426	0.120565	0.111349	0.163503	0.237982	0.162199	0.118901	0.107752	0.187895	0.906232	1.74377	-0.142047	0.802207	0.53477	0.0289348	Detected	Detected	Detected	Not Detected	Not Detected	Not Detected	Detected	Detected	Detected	0	3	0	FALSE	A_30_P01018116	chr10:93975406-93977476_R										lincRNA:chr10:93975406-93977476 reverse strand	chr10:93977265-93977206	mm|10qC2
188	A_30_P01018122	0.458068	0.442008	0.528583	0.923829	0.934053	0.750268	0.800306	0.74446	0.791233	0.47622	0.869383	0.778666	1.82559	0.895654	0.868364	-0.158987	0.00328187	0.273142	Detected	Detected	Detected	Detected	Detected	Detected	Detected	Detected	Detected	0	0	0	FALSE	A_30_P01018122	chr2:77715502-77719430_F										lincRNA:chr2:77715502-77719430 forward strand	chr2:77719371-77719430	mm|2qC3
189	A_30_P01018123	0.0124095	0.0104609	0.0105707	0.0226664	0.0302596	0.0281477	0.0220629	0.0259798	0.0196406	0.011147	0.0270246	0.0225611	2.42437	0.834837	1.27761	-0.260434	0.00205743	0.205108	Not Detected	Not Detected	Not Detected	Not Detected	Not Detected	Not Detected	Not Detected	Not Detected	Not Detected	3	3	3	FALSE	A_30_P01018123	chr9:14460976-14488051_R										lincRNA:chr9:14460976-14488051 reverse strand	chr9:14484488-14484429	mm|9qA2
190	A_30_P01018127	0.0848127	0.09001	0.0834593	0.138487	0.0999401	0.0927162	0.0866526	0.0952627	0.102707	0.086094	0.110381	0.0948742	1.2821	0.859516	0.358507	-0.218403	0.195204	0.383911	Detected	Detected	Detected	Detected	Not Detected	Not Detected	Not Detected	Not Detected	Detected	0	2	2	FALSE	A_30_P01018127	chr3:85842798-85887216_F										lincRNA:chr3:85842798-85887216 forward strand	chr3:85842863-85842922	mm|3qF1
191	A_30_P01018128	0.498436	0.516179	0.681854	0.624809	0.637186	0.740001	0.592237	0.778574	0.754807	0.56549	0.667332	0.708539	1.1801	1.06175	0.238903	0.0864432	0.220398	0.619201	Detected	Detected	Detected	Detected	Detected	Detected	Detected	Detected	Detected	0	0	0	FALSE	A_30_P01018128	chr19:36699712-36763966_R										lincRNA:chr19:36699712-36763966 reverse strand	chr19:36699772-36699713	mm|19qC2
192	A_30_P01018129	0.101242	0.117895	0.0911898	0.0846414	0.0262195	0.025071	0.0203362	0.0226873	0.0168154	0.103442	0.0453106	0.0199463	0.438027	0.440213	-1.19091	-1.18373	0.126095	0.237734	Detected	Detected	Detected	Not Detected	Not Detected	Not Detected	Not Detected	Not Detected	Not Detected	0	3	3	FALSE	A_30_P01018129	chr19:23068397-23190256_R										lincRNA:chr19:23068397-23190256 reverse strand	chr19:23068883-23068824	mm|19qB
193	A_30_P01018133	0.0102626	0.00879428	0.0150171	0.120622	0.0927136	0.0235113	0.0677152	0.0216671	0.0440874	0.011358	0.0789489	0.0444899	6.95095	0.563528	2.79721	-0.827441	0.0630912	0.489952	Not Detected	Not Detected	Not Detected	Detected	Not Detected	Not Detected	Not Detected	Not Detected	Not Detected	3	2	3	FALSE	A_30_P01018133	chr1:71939741-71947891_F										lincRNA:chr1:71939741-71947891 forward strand	chr1:71940116-71940175	mm|1qC3
194	A_30_P01018134	0.0106063	0.00914798	0.0109499	0.0379643	0.0260194	0.0248971	0.0196883	0.0225422	0.0165792	0.0102348	0.0296269	0.0196032	2.89474	0.661669	1.53343	-0.595819	0.00802476	0.0759786	Not Detected	Not Detected	Not Detected	Not Detected	Not Detected	Not Detected	Not Detected	Not Detected	Not Detected	3	3	3	FALSE	A_30_P01018134	chr5:33788271-33788845_R										lincRNA:chr5:33788271-33788845 reverse strand	chr5:33788331-33788272	mm|5qB1
195	A_30_P01018141	0.219862	0.194009	0.192566	0.289516	0.242458	0.178593	0.177099	0.23342	0.262271	0.202146	0.236856	0.224263	1.17171	0.946834	0.228612	-0.0788164	0.42639	0.804817	Detected	Detected	Detected	Detected	Detected	Detected	Detected	Detected	Detected	0	0	0	FALSE	A_30_P01018141	chr6:140639450-140662200_F										lincRNA:chr6:140639450-140662200 forward strand	chr6:140653660-140653719	mm|6qG2
196	A_30_P01018145	0.0395853	0.124037	0.114132	0.18964	0.109175	0.0951606	0.173202	0.26252	0.108545	0.0925847	0.131325	0.181422	1.41844	1.38147	0.504301	0.466207	0.391682	0.408988	Not Detected	Detected	Detected	Detected	Not Detected	Not Detected	Detected	Detected	Detected	1	2	0	FALSE	A_30_P01018145	chr4:135136959-135139933_F										lincRNA:chr4:135136959-135139933 forward strand	chr4:135139378-135139437	mm|4qD3
197	A_30_P01018151	0.36913	0.455627	0.483555	0.630005	0.517666	0.561457	0.626156	0.583456	0.571315	0.436104	0.569709	0.593642	1.30636	1.04201	0.385554	0.0593681	0.0604886	0.542104	Detected	Detected	Detected	Detected	Detected	Detected	Detected	Detected	Detected	0	0	0	FALSE	A_30_P01018151	chr3:35831966-35841638_F										lincRNA:chr3:35831966-35841638 forward strand	chr3:35832030-35832089	mm|3qB
198	A_30_P01018153	0.0317675	0.0424135	0.0404797	0.0598015	0.054047	0.114028	0.222575	0.045119	0.0477105	0.0382202	0.0759587	0.105135	1.9874	1.38411	0.990879	0.468954	0.0982309	0.889081	Not Detected	Not Detected	Not Detected	Not Detected	Not Detected	Not Detected	Detected	Not Detected	Not Detected	3	3	2	FALSE	A_30_P01018153	chr4:73870498-73881323_F										lincRNA:chr4:73870498-73881323 forward strand	chr4:73874172-73874231	mm|4qC3
199	A_30_P01018159	0.0509841	0.0678998	0.0482845	0.0927497	0.0623254	0.0636715	0.0381043	0.061259	0.0512616	0.0557228	0.0729155	0.0502083	1.30854	0.688582	0.387958	-0.538299	0.192725	0.119368	Detected	Detected	Detected	Detected	Not Detected	Not Detected	Not Detected	Not Detected	Not Detected	0	2	3	FALSE	A_30_P01018159	chr1:167218236-167218418_F										lincRNA:chr1:167218236-167218418 forward strand	chr1:167218359-167218418	mm|1qH2.3
200	A_30_P01018160	0.0123697	0.0104102	0.0114242	0.0227446	0.0303153	0.0281836	0.0224375	0.0256613	0.018867	0.0114014	0.0270812	0.0223219	2.37525	0.82426	1.24808	-0.278829	0.00252928	0.192898	Not Detected	Not Detected	Not Detected	Not Detected	Not Detected	Not Detected	Not Detected	Not Detected	Not Detected	3	3	3	FALSE	A_30_P01018160	chr11:19960515-19961093_R										lincRNA:chr11:19960515-19961093 reverse strand	chr11:19960954-19960895	mm|11qA3.1
201	A_30_P01018161	0.031678	0.0551569	0.0634185	0.110147	0.0822752	0.0635348	0.0596539	0.0950734	0.0435489	0.0500845	0.0853189	0.0660921	1.7035	0.774647	0.768502	-0.368388	0.112296	0.372118	Not Detected	Detected	Detected	Detected	Not Detected	Not Detected	Not Detected	Not Detected	Not Detected	1	2	3	FALSE	A_30_P01018161	chr2:117024098-117025009_R										lincRNA:chr2:117024098-117025009 reverse strand	chr2:117024920-117024861	mm|2qE5
202	A_30_P01018165	0.13999	0.145087	0.14881	0.223248	0.303895	0.234828	0.205798	0.295038	0.237616	0.144629	0.25399	0.24615	1.75615	0.969133	0.812417	-0.0452337	0.0251961	0.827084	Detected	Detected	Detected	Detected	Detected	Detected	Detected	Detected	Detected	0	0	0	FALSE	A_30_P01018165	chr4:149383134-149451259_F										lincRNA:chr4:149383134-149451259 forward strand	chr4:149422184-149422243	mm|4qE2
203	A_30_P01018166	0.0585977	0.0440103	0.133089	0.138721	0.100882	0.0522932	0.0806208	0.0833282	0.0974464	0.0785657	0.097299	0.0871318	1.23844	0.895506	0.308526	-0.159225	0.596504	0.909952	Detected	Detected	Detected	Detected	Not Detected	Not Detected	Not Detected	Not Detected	Detected	0	2	2	FALSE	A_30_P01018166	chr7:134372392-134372943_R										lincRNA:chr7:134372392-134372943 reverse strand	chr7:134372820-134372761	mm|7qF3
204	A_30_P01018170	0.0105614	0.00911138	0.0090551	0.0193914	0.0345348	0.0245532	0.0193431	0.0224642	0.0167265	0.00957597	0.0261598	0.0195113	2.73182	0.745849	1.44986	-0.423045	0.0207777	0.244329	Not Detected	Not Detected	Not Detected	Not Detected	Not Detected	Not Detected	Not Detected	Not Detected	Not Detected	3	3	3	FALSE	A_30_P01018170	chr15:95965249-96114921_R										lincRNA:chr15:95965249-96114921 reverse strand	chr15:95965371-95965312	mm|15qF1
205	A_30_P01018175	0.00975476	0.0133586	0.00837579	0.0265733	0.023857	0.0224987	0.0187004	0.0205498	0.0151125	0.0104964	0.0243097	0.0181209	2.31601	0.745419	1.21164	-0.423876	0.0161409	0.0607724	Not Detected	Not Detected	Not Detected	Not Detected	Not Detected	Not Detected	Not Detected	Not Detected	Not Detected	3	3	3	FALSE	A_30_P01018175	chr14:26093652-26208156_F										lincRNA:chr14:26093652-26208156 forward strand	chr14:26192655-26192714	mm|14qA3
206	A_30_P01018178	0.0312675	0.103017	0.0331082	0.239929	0.0878222	0.279173	0.428797	0.18736	0.140183	0.0557977	0.202308	0.252113	3.62575	1.24618	1.85828	0.317516	0.0659684	0.683897	Not Detected	Detected	Not Detected	Detected	Not Detected	Detected	Detected	Detected	Detected	2	1	0	FALSE	A_30_P01018178	chr16:59557120-59602070_F										lincRNA:chr16:59557120-59602070 forward strand	chr16:59557175-59557234	mm|16qC1.3
207	A_30_P01018180	0.0121277	0.0145875	0.0103605	0.02481	0.029199	0.0293696	0.385156	0.0254161	0.0397016	0.0123586	0.0277928	0.150091	2.24887	5.40035	1.1692	2.43305	0.00471017	0.368869	Not Detected	Not Detected	Not Detected	Not Detected	Not Detected	Not Detected	Detected	Not Detected	Not Detected	3	3	2	FALSE	A_30_P01018180	chr2:28203295-28249724_F										lincRNA:chr2:28203295-28249724 forward strand	chr2:28249281-28249335	mm|2qA3
208	A_30_P01018181	0.099208	0.106982	0.0901488	0.0867762	0.0346187	0.0257382	0.0399918	0.0565622	0.0563634	0.0987798	0.0490444	0.0509725	0.496503	1.03931	-1.01013	0.0556298	0.146624	0.699929	Detected	Detected	Detected	Not Detected	Not Detected	Not Detected	Not Detected	Not Detected	Not Detected	0	3	3	FALSE	A_30_P01018181	chrX:148803114-148851243_F										lincRNA:chrX:148803114-148851243 forward strand	chrX:148803178-148803237	mm|XqF3
209	A_30_P01018185	0.277004	0.177861	0.188164	0.259293	0.26585	0.143799	0.211614	0.253522	0.299246	0.214343	0.222981	0.254794	1.0403	1.14267	0.0569972	0.192414	0.932125	0.526521	Detected	Detected	Detected	Detected	Detected	Detected	Detected	Detected	Detected	0	0	0	FALSE	A_30_P01018185	chr8:126396600-126407275_F										lincRNA:chr8:126396600-126407275 forward strand	chr8:126397210-126397269	mm|8qE2
210	A_30_P01018186	0.908888	0.794547	0.750992	0.712365	0.63127	0.631253	0.605497	1.21589	0.633292	0.818143	0.658296	0.818225	0.804623	1.24294	-0.313616	0.313762	0.0413289	0.541004	Detected	Detected	Detected	Detected	Detected	Detected	Detected	Detected	Detected	0	0	0	FALSE	A_30_P01018186	chr11:3538125-3554450_F										lincRNA:chr11:3538125-3554450 forward strand	chr11:3547405-3547464	mm|11qA1
211	A_30_P01018188	0.0121211	0.0102243	0.0102732	0.0220722	0.0288622	0.0267227	0.0428944	0.0246804	0.0443371	0.0108729	0.0258857	0.037304	2.38076	1.4411	1.25142	0.527174	0.00144889	0.209968	Not Detected	Not Detected	Not Detected	Not Detected	Not Detected	Not Detected	Not Detected	Not Detected	Not Detected	3	3	3	FALSE	A_30_P01018188	chr11:87841800-87858725_F										lincRNA:chr11:87841800-87858725 forward strand	chr11:87845203-87845262	mm|11qC
212	A_30_P01018189	0.0120302	0.0100832	0.0101955	0.0218633	0.0288557	0.0267369	0.0213646	0.0245785	0.0183668	0.0107696	0.0258186	0.0214367	2.39735	0.830278	1.26144	-0.268333	0.00163884	0.189511	Not Detected	Not Detected	Not Detected	Not Detected	Not Detected	Not Detected	Not Detected	Not Detected	Not Detected	3	3	3	FALSE	A_30_P01018189	chr2:174088550-174109425_F										lincRNA:chr2:174088550-174109425 forward strand	chr2:174107955-174108014	mm|2qH4
213	A_30_P01018196	0.0186763	0.0101274	0.015224	0.0604714	0.0495136	0.0222694	0.0176942	0.023279	0.0150955	0.0146759	0.0440848	0.0186896	3.00389	0.423946	1.58683	-1.23805	0.0542351	0.107146	Not Detected	Not Detected	Not Detected	Not Detected	Not Detected	Not Detected	Not Detected	Not Detected	Not Detected	3	3	3	FALSE	A_30_P01018196	chr8:12873805-12880007_F										lincRNA:chr8:12873805-12880007 forward strand	chr8:12879910-12879969	mm|8qA1.1
214	A_30_P01018197	0.536526	0.466704	0.533208	0.434045	0.247264	0.196405	0.245787	0.194563	0.163453	0.512146	0.292571	0.201268	0.571265	0.687927	-0.807768	-0.539673	0.11572	0.299803	Detected	Detected	Detected	Detected	Detected	Detected	Detected	Detected	Detected	0	0	0	FALSE	A_30_P01018197	chr6:142915873-142938323_F										lincRNA:chr6:142915873-142938323 forward strand	chr6:142919640-142919699	mm|6qG3
215	A_30_P01018198	0.0130931	0.024665	0.03246	0.0436235	0.0320551	0.0300095	0.0599892	0.0272091	0.0309162	0.023406	0.0352293	0.0393715	1.50514	1.11758	0.589897	0.160374	0.221521	0.835739	Not Detected	Not Detected	Not Detected	Not Detected	Not Detected	Not Detected	Not Detected	Not Detected	Not Detected	3	3	3	FALSE	A_30_P01018198	chr18:60812427-60819775_R										lincRNA:chr18:60812427-60819775 reverse strand	chr18:60812487-60812428	mm|18qE1
216	A_30_P01018204	0.185985	0.162648	0.165056	0.220064	0.167472	0.198437	0.147313	0.27852	0.119172	0.17123	0.195325	0.181668	1.14072	0.930084	0.189941	-0.104568	0.251814	0.658117	Detected	Detected	Detected	Detected	Detected	Detected	Detected	Detected	Detected	0	0	0	FALSE	A_30_P01018204	chr5:15176325-15223375_F										lincRNA:chr5:15176325-15223375 forward strand	chr5:15217364-15217423	mm|5qA2
217	A_30_P01018210	0.00965326	0.00825022	0.00832346	0.0176613	0.0235099	0.0222884	0.0176479	0.0205344	0.0152705	0.00874231	0.0211532	0.0178176	2.41964	0.842311	1.27479	-0.247574	0.00249103	0.234574	Not Detected	Not Detected	Not Detected	Not Detected	Not Detected	Not Detected	Not Detected	Not Detected	Not Detected	3	3	3	FALSE	A_30_P01018210	chr2:75447542-75448025_R										lincRNA:chr2:75447542-75448025 reverse strand	chr2:75447602-75447543	mm|2qC3
218	A_30_P01018212	0.161506	0.154999	0.175556	0.332822	0.36532	0.216696	1.12691	0.255821	0.215181	0.16402	0.304946	0.532635	1.8592	1.74666	0.894679	0.804595	0.0590945	0.647948	Detected	Detected	Detected	Detected	Detected	Detected	Detected	Detected	Detected	0	0	0	FALSE	A_30_P01018212	chr3:37543528-37546874_F										lincRNA:chr3:37543528-37546874 forward strand	chr3:37546793-37546852	mm|3qB
219	A_30_P01018218	1.4065	1.23925	1.13599	0.748764	0.387394	0.284427	0.326732	0.227981	0.369025	1.26058	0.473528	0.307912	0.375643	0.650251	-1.41257	-0.62093	0.0596297	0.336228	Detected	Detected	Detected	Detected	Detected	Detected	Detected	Detected	Detected	0	0	0	FALSE	A_30_P01018218	chr2:72818943-72826893_F										lincRNA:chr2:72818943-72826893 forward strand	chr2:72821940-72821999	mm|2qC3
220	A_30_P01018222	0.576509	0.570568	0.594823	0.813333	0.782028	0.868231	0.813295	0.987172	0.789391	0.580633	0.821197	0.863286	1.41431	1.05125	0.500101	0.0721093	0.00310276	0.594282	Detected	Detected	Detected	Detected	Detected	Detected	Detected	Detected	Detected	0	0	0	FALSE	A_30_P01018222	chr16:95978147-96138364_R										lincRNA:chr16:95978147-96138364 reverse strand	chr16:96138341-96138282	mm|16qC4
221	A_30_P01018224	0.0103364	0.00882636	0.00893733	0.0402147	0.0254989	0.0240922	0.0190999	0.021911	0.0193375	0.00936669	0.0299352	0.0201161	3.19593	0.671989	1.67623	-0.573492	0.013428	0.140864	Not Detected	Not Detected	Not Detected	Not Detected	Not Detected	Not Detected	Not Detected	Not Detected	Not Detected	3	3	3	FALSE	A_30_P01018224	chr19:58222540-58223077_F										lincRNA:chr19:58222540-58223077 forward strand	chr19:58223015-58223074	mm|19qD2
222	A_30_P01018226	0.0619761	0.0474167	0.0585777	0.133026	0.0793316	0.0767353	0.124992	0.10962	0.0559655	0.0559901	0.0963644	0.096859	1.7211	1.00513	0.783327	0.00738676	0.0837352	0.955757	Detected	Detected	Detected	Detected	Not Detected	Not Detected	Detected	Detected	Not Detected	0	2	1	FALSE	A_30_P01018226	chr12:110738120-110769295_R										lincRNA:chr12:110738120-110769295 reverse strand	chr12:110750166-110750107	mm|12qF1
223	A_30_P01018227	0.0169466	0.0171484	0.0349583	0.0237566	0.0389251	0.0294337	0.02334	0.0268106	0.0287488	0.0230178	0.0307052	0.0262998	1.33398	0.856527	0.415733	-0.22343	0.317437	0.44647	Not Detected	Not Detected	Not Detected	Not Detected	Not Detected	Not Detected	Not Detected	Not Detected	Not Detected	3	3	3	FALSE	A_30_P01018227	chr1:71718767-71719614_F										lincRNA:chr1:71718767-71719614 forward strand	chr1:71719444-71719503	mm|1qC3
224	A_30_P01018229	0.0112331	0.0130723	0.00958699	0.0207855	0.0275556	0.0256967	0.0203964	0.0238163	0.017825	0.0112975	0.0246792	0.0206792	2.18449	0.83792	1.1273	-0.255115	0.00319116	0.21194	Not Detected	Not Detected	Not Detected	Not Detected	Not Detected	Not Detected	Not Detected	Not Detected	Not Detected	3	3	3	FALSE	A_30_P01018229	chr12:21380896-21387071_R										lincRNA:chr12:21380896-21387071 reverse strand	chr12:21383074-21383015	mm|12qA1.3
225	A_30_P01018230	0.0137678	0.0103843	0.0246871	0.90373	0.0304284	0.0285541	0.0227583	0.0257111	0.0195368	0.0162797	0.320904	0.0226687	19.7119	0.0706402	4.301	-3.82337	0.252226	0.341963	Not Detected	Not Detected	Not Detected	Detected	Not Detected	Not Detected	Not Detected	Not Detected	Not Detected	3	2	3	FALSE	A_30_P01018230	chr4:88745771-88776323_F										lincRNA:chr4:88745771-88776323 forward strand	chr4:88769991-88770050	mm|4qC4
226	A_30_P01018231	0.0337935	0.0290966	0.0298212	0.0434279	0.029675	0.0336258	0.0412284	0.025603	0.0193557	0.0309038	0.0355762	0.028729	1.15119	0.807535	0.203131	-0.308404	0.370489	0.386644	Not Detected	Not Detected	Not Detected	Not Detected	Not Detected	Not Detected	Not Detected	Not Detected	Not Detected	3	3	3	FALSE	A_30_P01018231	chr12:16833551-16901804_R										lincRNA:chr12:16833551-16901804 reverse strand
227	A_30_P01018238	0.0687751	0.0921688	0.0916791	0.0216605	0.0455004	0.0498286	0.0603701	0.0399787	0.0180928	0.0842077	0.0389965	0.0394805	0.4631	1.01241	-1.11061	0.0177955	0.0751351	0.933884	Detected	Detected	Detected	Not Detected	Not Detected	Not Detected	Not Detected	Not Detected	Not Detected	0	3	3	FALSE	A_30_P01018238	chr2:108382077-108441137_R										lincRNA:chr2:108382077-108441137 reverse strand	chr2:108412824-108412765	mm|2qE3
228	A_30_P01018239	0.0418821	0.038827	0.0378166	0.0593084	0.066421	0.0497884	0.101894	0.0549656	0.0874177	0.0395086	0.0585059	0.0814259	1.48084	1.39175	0.566417	0.476904	0.0320137	0.237938	Not Detected	Not Detected	Not Detected	Not Detected	Not Detected	Not Detected	Detected	Not Detected	Detected	3	3	1	FALSE	A_30_P01018239	chr10:81069014-81083448_F										lincRNA:chr10:81069014-81083448 forward strand	chr10:81083325-81083384	mm|10qC1
229	A_30_P01018242	0.0107496	0.017684	0.0134312	0.0235609	0.0258066	0.0565607	0.0215108	0.0220392	0.0164768	0.013955	0.0353094	0.0200089	2.53024	0.566675	1.33927	-0.819406	0.0696083	0.210842	Not Detected	Not Detected	Not Detected	Not Detected	Not Detected	Not Detected	Not Detected	Not Detected	Not Detected	3	3	3	FALSE	A_30_P01018242	chr13:51249947-51250937_F										lincRNA:chr13:51249947-51250937 forward strand	chr13:51250748-51250807	mm|13qA5
230	A_30_P01018244	0.0434826	0.0413031	0.053652	0.0533341	0.0345293	0.089592	0.0200458	0.0406545	0.0171799	0.0461459	0.0591518	0.02596	1.28184	0.438871	0.358221	-1.18813	0.587764	0.0980874	Not Detected	Not Detected	Detected	Not Detected	Not Detected	Not Detected	Not Detected	Not Detected	Not Detected	2	3	3	FALSE	A_30_P01018244	chr8:70623390-70645212_R										lincRNA:chr8:70623390-70645212 reverse strand	chr8:70623450-70623391	mm|8qB3.3
231	A_30_P01018245	0.0280091	0.030643	0.0119972	0.0217357	0.0289496	0.0753556	0.0211571	0.0250873	0.0189387	0.0235498	0.0420136	0.0217277	1.78404	0.517158	0.835145	-0.951323	0.351632	0.30123	Not Detected	Not Detected	Not Detected	Not Detected	Not Detected	Not Detected	Not Detected	Not Detected	Not Detected	3	3	3	FALSE	A_30_P01018245	chr12:109993800-109994116_R										lincRNA:chr12:109993800-109994116 reverse strand	chr12:109994049-109993990	mm|12qF1
232	A_30_P01018246	0.24481	0.284528	0.256596	0.395968	0.350703	0.326401	0.413111	0.394303	0.359426	0.261978	0.357691	0.388947	1.36534	1.08738	0.449265	0.120861	0.0139575	0.293816	Detected	Detected	Detected	Detected	Detected	Detected	Detected	Detected	Detected	0	0	0	FALSE	A_30_P01018246	chr1:93812836-93816128_F										lincRNA:chr1:93812836-93816128 forward strand	chr1:93815364-93815423	mm|1qD
233	A_30_P01018249	0.272535	0.250173	0.28053	0.46329	0.34007	0.219159	0.478225	0.222912	0.226914	0.267746	0.34084	0.30935	1.273	0.907612	0.348228	-0.139852	0.461121	0.739512	Detected	Detected	Detected	Detected	Detected	Detected	Detected	Detected	Detected	0	0	0	FALSE	A_30_P01018249	chr8:113968152-113973727_R										lincRNA:chr8:113968152-113973727 reverse strand	chr8:113972315-113972256	mm|8qE1
234	A_30_P01018255	0.0101641	0.00870088	0.00872497	0.0501215	0.0244207	0.0231408	0.0182926	0.0212086	0.0427014	0.00919663	0.032561	0.0274008	3.54054	0.841523	1.82397	-0.248925	0.0358249	0.646574	Not Detected	Not Detected	Not Detected	Not Detected	Not Detected	Not Detected	Not Detected	Not Detected	Not Detected	3	3	3	FALSE	A_30_P01018255	chr3:106858397-106896812_R										lincRNA:chr3:106858397-106896812 reverse strand	chr3:106896745-106896686	mm|3qF2.3
235	A_30_P01018256	0.00992765	0.0151705	0.026544	0.0267774	0.0291883	0.0220757	0.0212996	0.0307093	0.024536	0.017214	0.0260138	0.025515	1.5112	0.980823	0.595694	-0.0279353	0.223931	0.867081	Not Detected	Not Detected	Not Detected	Not Detected	Not Detected	Not Detected	Not Detected	Not Detected	Not Detected	3	3	3	FALSE	A_30_P01018256	chr14:78957377-78963514_F										lincRNA:chr14:78957377-78963514 forward strand	chr14:78963455-78963514	mm|14qD3
236	A_30_P01018260	0.0103069	0.00871964	0.00880116	0.0187531	0.0249851	0.023421	0.0186455	0.0213919	0.0158632	0.0092759	0.0223864	0.0186335	2.4134	0.832359	1.27106	-0.264723	0.00216255	0.208533	Not Detected	Not Detected	Not Detected	Not Detected	Not Detected	Not Detected	Not Detected	Not Detected	Not Detected	3	3	3	FALSE	A_30_P01018260	chr10:69844350-69844784_F										lincRNA:chr10:69844350-69844784 forward strand	chr10:69844725-69844784	mm|10qB5.3
237	A_30_P01018263	0.0122428	0.010341	0.0104188	0.0223942	0.0293308	0.0272789	0.0218113	0.0253364	0.0187873	0.0110009	0.0263346	0.0219784	2.39387	0.83458	1.25934	-0.260878	0.00152492	0.19875	Not Detected	Not Detected	Not Detected	Not Detected	Not Detected	Not Detected	Not Detected	Not Detected	Not Detected	3	3	3	FALSE	A_30_P01018263	chr9:53613193-53613871_F										lincRNA:chr9:53613193-53613871 forward strand	chr9:53613766-53613825	mm|9qA5.3
238	A_30_P01018265	0.0294224	0.014732	0.0214578	0.0402481	0.0264192	0.0248419	0.078753	0.0843044	0.0402158	0.0218708	0.0305031	0.0677577	1.3947	2.22134	0.479952	1.15143	0.242699	0.0614869	Not Detected	Not Detected	Not Detected	Not Detected	Not Detected	Not Detected	Not Detected	Not Detected	Not Detected	3	3	3	FALSE	A_30_P01018265	chr13:5506700-5519000_R										lincRNA:chr13:5506700-5519000 reverse strand	chr13:5508172-5508113	mm|13qA1
239	A_30_P01018267	0.0388002	0.0112676	0.0651957	0.0179032	0.515986	0.0520836	0.0473791	0.0696166	0.0373143	0.0384211	0.195324	0.0514367	5.08377	0.26334	2.3459	-1.925	0.461542	0.693807	Not Detected	Not Detected	Detected	Not Detected	Detected	Not Detected	Not Detected	Not Detected	Not Detected	2	2	3	FALSE	A_30_P01018267	chr13:16050871-16065396_R										lincRNA:chr13:16050871-16065396 reverse strand	chr13:16062160-16062101	mm|13qA1
240	A_30_P01018270	0.0294603	0.0245932	0.0302244	0.0495981	0.0312715	0.0823264	0.0419601	0.0231803	0.0285478	0.0280926	0.0543986	0.0312294	1.9364	0.574085	0.953379	-0.800665	0.164607	0.210758	Not Detected	Not Detected	Not Detected	Not Detected	Not Detected	Not Detected	Not Detected	Not Detected	Not Detected	3	3	3	FALSE	A_30_P01018270	chr11:59193573-59193832_R										lincRNA:chr11:59193573-59193832 reverse strand	chr11:59193694-59193635	mm|11qB1.3
241	A_30_P01018271	0.0634473	0.0434196	0.0520892	0.111389	0.0972345	0.0820298	0.0785722	0.0657361	0.110638	0.0529854	0.0968843	0.0849822	1.82851	0.877151	0.870669	-0.189104	0.0137143	0.462219	Detected	Not Detected	Detected	Detected	Not Detected	Not Detected	Not Detected	Not Detected	Detected	1	2	2	FALSE	A_30_P01018271	chr14:99735346-99735699_R										lincRNA:chr14:99735346-99735699 reverse strand	chr14:99735639-99735580	mm|14qE2.2
242	A_30_P01018273	0.0145808	0.0396093	0.0255393	0.0248234	0.0283798	0.0262856	0.0425731	0.02419	0.0706626	0.0265764	0.0264962	0.0458085	0.996982	1.72887	-0.00435994	0.789829	0.818508	0.277641	Not Detected	Not Detected	Not Detected	Not Detected	Not Detected	Not Detected	Not Detected	Not Detected	Not Detected	3	3	3	FALSE	A_30_P01018273	chr12:55271691-55276492_R										lincRNA:chr12:55271691-55276492 reverse strand	chr12:55276427-55276368	mm|12qC1
243	A_30_P01018274	0.0449016	0.0599276	0.056883	0.0946187	0.0485925	0.040771	0.0484278	0.0762986	0.101454	0.0539041	0.0613274	0.0753936	1.13771	1.22936	0.186137	0.29791	0.82259	0.529274	Not Detected	Detected	Detected	Not Detected	Not Detected	Not Detected	Not Detected	Not Detected	Detected	1	3	2	FALSE	A_30_P01018274	chr2:151343784-151344246_F										lincRNA:chr2:151343784-151344246 forward strand	chr2:151343867-151343926	mm|2qG3
244	A_30_P01018277	0.0198824	0.0274983	0.0330606	0.0219839	0.0296874	0.0275522	0.0259091	0.025561	0.0192186	0.0268138	0.0264078	0.0235629	0.984861	0.892269	-0.022008	-0.164449	0.992641	0.434977	Not Detected	Not Detected	Not Detected	Not Detected	Not Detected	Not Detected	Not Detected	Not Detected	Not Detected	3	3	3	FALSE	A_30_P01018277	chr7:140011140-140018815_R										lincRNA:chr7:140011140-140018815 reverse strand	chr7:140013672-140013613	mm|7qF3
245	A_30_P01018279	0.0120352	0.0102161	0.0327406	0.181814	0.0295853	0.0278971	0.0220063	0.0251732	0.0188381	0.0183306	0.0797655	0.0220059	4.35148	0.275882	2.12151	-1.85787	0.183162	0.28454	Not Detected	Not Detected	Not Detected	Detected	Not Detected	Not Detected	Not Detected	Not Detected	Not Detected	3	2	3	FALSE	A_30_P01018279	chr15:99765243-99783300_F										lincRNA:chr15:99765243-99783300 forward strand	chr15:99783023-99783082	mm|15qF1
246	A_30_P01018286	0.0104322	0.0109866	0.0090673	0.0194755	0.0256353	0.0244914	0.0276159	0.0222285	0.0161815	0.010162	0.0232007	0.0220086	2.28308	0.948617	1.19098	-0.076102	0.0022456	0.720832	Not Detected	Not Detected	Not Detected	Not Detected	Not Detected	Not Detected	Not Detected	Not Detected	Not Detected	3	3	3	FALSE	A_30_P01018286	chr3:37606942-37610130_F										lincRNA:chr3:37606942-37610130 forward strand	chr3:37609885-37609944	mm|3qB
247	A_30_P01018288	2.27514	2.14465	2.3916	2.11723	3.5048	3.1164	3.32784	3.92342	4.46679	2.27046	2.91281	3.90602	1.28291	1.34098	0.359424	0.423288	0.270844	0.171208	Detected	Detected	Detected	Detected	Detected	Detected	Detected	Detected	Detected	0	0	0	FALSE	A_30_P01018288	chr12:77544397-77564122_R										lincRNA:chr12:77544397-77564122 reverse strand	chr12:77553142-77553083	mm|12qC3
248	A_30_P01018294	0.0593981	0.0717805	0.0330805	0.0201164	0.026336	0.255257	0.0195731	0.0224277	0.028842	0.054753	0.10057	0.0236142	1.83679	0.234804	0.877188	-2.09047	0.987984	0.430925	Detected	Detected	Not Detected	Not Detected	Not Detected	Detected	Not Detected	Not Detected	Not Detected	1	2	3	FALSE	A_30_P01018294	chr3:127170996-127201096_F										lincRNA:chr3:127170996-127201096 forward strand	chr3:127184302-127184361	mm|3qG2
249	A_30_P01018295	0.479947	0.569084	0.543869	0.436807	0.295966	0.329188	0.332128	0.395236	0.308217	0.530967	0.353987	0.345194	0.666684	0.975158	-0.584924	-0.0362916	0.0526154	0.909399	Detected	Detected	Detected	Detected	Detected	Detected	Detected	Detected	Detected	0	0	0	FALSE	A_30_P01018295	chr12:16003706-16022581_F										lincRNA:chr12:16003706-16022581 forward strand	chr12:16008758-16008817	mm|12qA1.1
250	A_30_P01018297	6.60574	6.8322	6.40685	10.9211	12.4043	9.6642	10.5578	12.1699	10.2713	6.61493	10.9965	10.9997	1.66238	1.00029	0.73325	0.000412294	0.0151888	0.977656	Detected	Detected	Detected	Detected	Detected	Detected	Detected	Detected	Detected	0	0	0	FALSE	A_30_P01018297	chr16:90038086-90127636_F										lincRNA:chr16:90038086-90127636 forward strand	chr16:90090750-90090809	mm|16qC3.3
251	A_30_P01018303	0.0543665	0.0605343	0.0819242	0.260766	0.110012	0.106237	0.268794	0.0863767	0.0737407	0.0656083	0.159005	0.14297	2.42355	0.899157	1.27712	-0.153355	0.094747	0.723182	Not Detected	Detected	Detected	Detected	Not Detected	Not Detected	Detected	Not Detected	Not Detected	1	2	2	FALSE	A_30_P01018303	chr4:118723941-118757032_F										lincRNA:chr4:118723941-118757032 forward strand	chr4:118740800-118740859	mm|4qD2.1
252	A_30_P01018310	0.0525485	0.0479316	0.0454711	0.0506089	0.0359087	0.0847962	0.020751	0.062672	0.0823664	0.0486504	0.0571046	0.0552632	1.17377	0.967753	0.231155	-0.0472888	0.73197	0.819369	Not Detected	Not Detected	Not Detected	Not Detected	Not Detected	Not Detected	Not Detected	Not Detected	Not Detected	3	3	3	FALSE	A_30_P01018310	chr13:112337405-112356455_R										lincRNA:chr13:112337405-112356455 reverse strand	chr13:112351430-112351371	mm|13qD2.2
253	A_30_P01018311	0.0198703	0.0152948	0.00977613	0.0244734	0.0277679	0.0259398	0.0204185	0.0240916	0.0181653	0.0149804	0.0260604	0.0208918	1.73963	0.80167	0.798779	-0.318919	0.099012	0.092911	Not Detected	Not Detected	Not Detected	Not Detected	Not Detected	Not Detected	Not Detected	Not Detected	Not Detected	3	3	3	FALSE	A_30_P01018311	chr2:181664903-181665707_R										lincRNA:chr2:181664903-181665707 reverse strand	chr2:181664970-181664911	mm|2qH4
254	A_30_P01018314	0.0123006	0.0103618	0.0104569	0.0224597	0.0294934	0.0274344	0.0219439	0.025418	0.0188814	0.0110398	0.0264625	0.0220811	2.39701	0.834429	1.26124	-0.261138	0.00157059	0.19935	Not Detected	Not Detected	Not Detected	Not Detected	Not Detected	Not Detected	Not Detected	Not Detected	Not Detected	3	3	3	FALSE	A_30_P01018314	chr8:86706637-86707004_R										lincRNA:chr8:86706637-86707004 reverse strand	chr8:86706839-86706780	mm|8qC3
255	A_30_P01018332	1.56922	1.8188	1.94478	1.56503	3.06457	2.72029	3.20186	3.39265	3.2656	1.7776	2.44996	3.2867	1.37824	1.34153	0.462828	0.423882	0.300976	0.248048	Detected	Detected	Detected	Detected	Detected	Detected	Detected	Detected	Detected	0	0	0	FALSE	A_30_P01018332	chr6:122741562-122743423_R										lincRNA:chr6:122741562-122743423 reverse strand	chr6:122742200-122742141	mm|6qF2
256	A_30_P01018334	0.036055	0.0430283	0.0348184	0.0853985	0.0676795	0.0434463	0.094087	0.0950852	0.0570816	0.0379673	0.0655081	0.0820846	1.72538	1.25304	0.786918	0.325438	0.111273	0.415655	Not Detected	Not Detected	Not Detected	Not Detected	Not Detected	Not Detected	Not Detected	Not Detected	Not Detected	3	3	3	FALSE	A_30_P01018334	chr9:56913341-56913901_R										lincRNA:chr9:56913341-56913901 reverse strand	chr9:56913490-56913431	mm|9qB
257	A_30_P01018338	0.0163078	0.0214003	0.0126804	0.0706281	0.0241159	0.0288519	0.0180836	0.0312821	0.0340783	0.0167962	0.0411986	0.0278147	2.45286	0.675136	1.29446	-0.56675	0.122009	0.474923	Not Detected	Not Detected	Not Detected	Not Detected	Not Detected	Not Detected	Not Detected	Not Detected	Not Detected	3	3	3	FALSE	A_30_P01018338	chr14:106562325-106660675_F										lincRNA:chr14:106562325-106660675 forward strand	chr14:106639707-106639766	mm|14qE2.3
258	A_30_P01018341	0.291506	0.261272	0.29958	0.179717	0.0383894	0.0381383	0.0374727	0.0250183	0.0618129	0.284119	0.0854148	0.0414346	0.30063	0.485099	-1.73394	-1.04365	0.101132	0.447926	Detected	Detected	Detected	Detected	Not Detected	Not Detected	Not Detected	Not Detected	Not Detected	0	2	3	FALSE	A_30_P01018341	chr10:8606683-8665783_R										lincRNA:chr10:8606683-8665783 reverse strand	chr10:8661353-8661294	mm|10qA1
259	A_30_P01018342	0.0523295	0.03406	0.0372447	0.0595907	0.0231517	0.021955	0.0482494	0.0540905	0.028336	0.0412114	0.0348992	0.0435587	0.846833	1.24813	-0.239851	0.319767	0.515666	0.486345	Detected	Not Detected	Not Detected	Not Detected	Not Detected	Not Detected	Not Detected	Not Detected	Not Detected	2	3	3	FALSE	A_30_P01018342	chr18:46954653-46955671_F										lincRNA:chr18:46954653-46955671 forward strand	chr18:46955531-46955590	mm|18qC
260	A_30_P01018344	0.0469537	0.0175406	0.0223415	0.043518	0.028226	0.0278998	0.0211071	0.0845831	0.0677405	0.0289452	0.0332146	0.0578102	1.1475	1.74051	0.198492	0.799507	0.575985	0.436837	Not Detected	Not Detected	Not Detected	Not Detected	Not Detected	Not Detected	Not Detected	Not Detected	Not Detected	3	3	3	FALSE	A_30_P01018344	chr15:32705156-32729116_R										lincRNA:chr15:32705156-32729116 reverse strand	chr15:32708866-32708807	mm|15qB3.1
261	A_30_P01018345	0.0203659	0.0304785	0.0147219	0.0296428	0.028866	0.0271279	0.0473011	0.0380743	0.0281958	0.0218554	0.0285456	0.0378571	1.30611	1.3262	0.385274	0.407295	0.276953	0.221491	Not Detected	Not Detected	Not Detected	Not Detected	Not Detected	Not Detected	Not Detected	Not Detected	Not Detected	3	3	3	FALSE	A_30_P01018345	chr8:87504644-87513694_F										lincRNA:chr8:87504644-87513694 forward strand	chr8:87513546-87513605	mm|8qC3
262	A_30_P01018349	0.0115165	0.00971761	0.00984273	0.0211369	0.0281187	0.0262231	0.0206674	0.0243333	0.0183429	0.010359	0.0251595	0.0211145	2.42877	0.839225	1.28023	-0.25287	0.00198022	0.214944	Not Detected	Not Detected	Not Detected	Not Detected	Not Detected	Not Detected	Not Detected	Not Detected	Not Detected	3	3	3	FALSE	A_30_P01018349	chr7:6108350-6119600_R										lincRNA:chr7:6108350-6119600 reverse strand
263	A_30_P01018351	0.0894658	0.0877229	0.112921	0.0676098	0.0564365	0.084341	0.0608082	0.108543	0.0807406	0.0967032	0.0694624	0.083364	0.718305	1.20013	-0.477331	0.263191	0.0833996	0.460716	Detected	Detected	Detected	Not Detected	Not Detected	Not Detected	Not Detected	Detected	Detected	0	3	1	FALSE	A_30_P01018351	chr4:114585803-114588898_F										lincRNA:chr4:114585803-114588898 forward strand	chr4:114588837-114588896	mm|4qD1
264	A_30_P01018353	0.0273539	0.0132155	0.0100935	0.0195495	0.121748	0.0244235	0.0400836	0.0226591	0.017021	0.0168876	0.0552404	0.0265879	3.27106	0.481313	1.70976	-1.05495	0.250032	0.53758	Not Detected	Not Detected	Not Detected	Not Detected	Not Detected	Not Detected	Not Detected	Not Detected	Not Detected	3	3	3	FALSE	A_30_P01018353	chr7:28797929-28798370_R										lincRNA:chr7:28797929-28798370 reverse strand	chr7:28798270-28798211	mm|7qA3
265	A_30_P01018356	0.0115469	0.00974899	0.00990094	0.0212284	0.0446581	0.0264192	0.0209943	0.0446037	0.0176021	0.0103989	0.0307686	0.0277333	2.95882	0.901353	1.56502	-0.149835	0.0360477	0.719773	Not Detected	Not Detected	Not Detected	Not Detected	Not Detected	Not Detected	Not Detected	Not Detected	Not Detected	3	3	3	FALSE	A_30_P01018356	chr13:65716675-65765575_R										lincRNA:chr13:65716675-65765575 reverse strand	chr13:65725457-65725398	mm|13qB3
266	A_30_P01018357	0.34829	0.320105	0.418226	0.653928	0.589093	0.550123	0.625734	0.46059	0.382779	0.362207	0.597715	0.489701	1.6502	0.819289	0.722643	-0.287555	0.00902289	0.26484	Detected	Detected	Detected	Detected	Detected	Detected	Detected	Detected	Detected	0	0	0	FALSE	A_30_P01018357	chr15:63902437-63908787_F										lincRNA:chr15:63902437-63908787 forward strand	chr15:63902462-63902521	mm|15qD1
267	A_30_P01018359	0.0124318	0.010499	0.0104815	0.306995	0.0304023	0.0990712	0.0224493	0.0261186	0.0196102	0.0111374	0.145489	0.022726	13.0631	0.156204	3.70743	-2.6785	0.0818502	0.157945	Not Detected	Not Detected	Not Detected	Detected	Not Detected	Not Detected	Not Detected	Not Detected	Not Detected	3	2	3	FALSE	A_30_P01018359	chr5:142844084-142844445_R										lincRNA:chr5:142844084-142844445 reverse strand	chr5:142844144-142844085	mm|5qG2
268	A_30_P01018363	0.183007	0.151096	0.20437	0.249009	0.199956	0.273239	0.185339	0.185874	0.193173	0.179491	0.240735	0.188128	1.34121	0.781476	0.423532	-0.355727	0.0840071	0.120677	Detected	Detected	Detected	Detected	Detected	Detected	Detected	Detected	Detected	0	0	0	FALSE	A_30_P01018363	chr12:21381390-21381723_F										lincRNA:chr12:21381390-21381723 forward strand	chr12:21381664-21381723	mm|12qA1.3
269	A_30_P01018372	1.14204	0.980304	1.10348	0.577079	0.82683	0.974545	1.1677	0.826163	0.908819	1.07528	0.792818	0.96756	0.737316	1.22041	-0.439646	0.287362	0.161678	0.327735	Detected	Detected	Detected	Detected	Detected	Detected	Detected	Detected	Detected	0	0	0	FALSE	A_30_P01018372	chr18:35204950-35216650_R										lincRNA:chr18:35204950-35216650 reverse strand	chr18:35213963-35213904	mm|18qB1
270	A_30_P01018374	0.500627	0.503981	0.614751	0.832321	0.481203	0.6979	0.858157	0.943982	0.452944	0.539786	0.670475	0.751694	1.24211	1.12114	0.312794	0.164963	0.352407	0.765215	Detected	Detected	Detected	Detected	Detected	Detected	Detected	Detected	Detected	0	0	0	FALSE	A_30_P01018374	chr7:4827340-4863315_R										lincRNA:chr7:4827340-4863315 reverse strand	chr7:4828781-4828722	mm|7qA1
271	A_30_P01018376	0.0192327	0.0211364	0.0371578	0.0462481	0.0302208	0.0281023	0.0366604	0.0763013	0.0418673	0.0258423	0.0348571	0.0516097	1.34884	1.48061	0.431718	0.56619	0.288699	0.262552	Not Detected	Not Detected	Not Detected	Not Detected	Not Detected	Not Detected	Not Detected	Not Detected	Not Detected	3	3	3	FALSE	A_30_P01018376	chr1:153685487-153710962_R										lincRNA:chr1:153685487-153710962 reverse strand	chr1:153699333-153699274	mm|1qG2
272	A_30_P01018378	0.220229	0.155492	0.174612	0.193359	0.172692	0.217779	0.133484	0.173127	0.136479	0.183444	0.19461	0.147697	1.06087	0.758935	0.0852458	-0.397953	0.626226	0.0623837	Detected	Detected	Detected	Detected	Detected	Detected	Detected	Detected	Detected	0	0	0	FALSE	A_30_P01018378	chr1:93744621-93825321_F										lincRNA:chr1:93744621-93825321 forward strand	chr1:93755516-93755575	mm|1qD
273	A_30_P01018383	0.0131791	0.0301574	0.0221515	0.0456003	0.030514	0.0434244	0.0489271	0.0237244	0.0258809	0.0218293	0.0398462	0.0328441	1.82535	0.824271	0.868176	-0.278809	0.0992775	0.435378	Not Detected	Not Detected	Not Detected	Not Detected	Not Detected	Not Detected	Not Detected	Not Detected	Not Detected	3	3	3	FALSE	A_30_P01018383	chr7:117144653-117150145_R										lincRNA:chr7:117144653-117150145 reverse strand	chr7:117144713-117144654	mm|7qF1
274	A_30_P01018386	0.445244	0.414554	0.44975	0.556908	1.09618	0.818766	0.801272	1.01839	0.795144	0.436516	0.82395	0.871602	1.88756	1.05783	0.916522	0.0811131	0.090284	0.712653	Detected	Detected	Detected	Detected	Detected	Detected	Detected	Detected	Detected	0	0	0	FALSE	A_30_P01018386	chr17:41231055-41249764_R										lincRNA:chr17:41231055-41249764 reverse strand	chr17:41239023-41238964	mm|17qB2
275	A_30_P01018392	0.0101011	0.00868853	0.0115119	0.0645174	0.0379258	0.0460193	0.0325715	0.0256815	0.0323192	0.0101005	0.0494875	0.0301907	4.89951	0.610068	2.29264	-0.712957	0.00285219	0.0728759	Not Detected	Not Detected	Not Detected	Not Detected	Not Detected	Not Detected	Not Detected	Not Detected	Not Detected	3	3	3	FALSE	A_30_P01018392	chr10:81589292-81626369_R										lincRNA:chr10:81589292-81626369 reverse strand	chr10:81622304-81622245	mm|10qC1
276	A_30_P01018399	0.0761201	0.0903347	0.0762611	0.0506198	0.0357351	0.0338622	0.023649	0.0629887	0.0762296	0.0809053	0.0400724	0.0542891	0.4953	1.35478	-1.01363	0.438054	0.0168317	0.636257	Detected	Detected	Detected	Not Detected	Not Detected	Not Detected	Not Detected	Not Detected	Not Detected	0	3	3	FALSE	A_30_P01018399	chr4:146890596-146891297_F										lincRNA:chr4:146890596-146891297 forward strand	chr4:146890954-146891013	mm|4qE1
277	A_30_P01018401	0.012037	0.0101261	0.0101996	0.0221394	0.0294484	0.0274741	0.0216974	0.0253315	0.0190558	0.0107875	0.026354	0.0220282	2.443	0.83586	1.28865	-0.258666	0.00184468	0.207198	Not Detected	Not Detected	Not Detected	Not Detected	Not Detected	Not Detected	Not Detected	Not Detected	Not Detected	3	3	3	FALSE	A_30_P01018401	chr15:96984422-97000322_F										lincRNA:chr15:96984422-97000322 forward strand	chr15:96991770-96991829	mm|15qF1
278	A_30_P01018402	0.204	0.164248	0.153329	0.189912	0.0804338	0.127406	0.0819271	0.291399	0.114165	0.173859	0.132584	0.162497	0.762593	1.22562	-0.391014	0.293509	0.322226	0.818647	Detected	Detected	Detected	Detected	Not Detected	Not Detected	Not Detected	Detected	Detected	0	2	1	FALSE	A_30_P01018402	chr6:115468025-115489250_R										lincRNA:chr6:115468025-115489250 reverse strand	chr6:115486728-115486669	mm|6qE3
279	A_30_P01018414	0.0098526	0.0161825	0.00850068	0.0181561	0.0242954	0.0229548	0.0223666	0.02162	0.0359519	0.0115119	0.0218021	0.0266461	1.89387	1.22218	0.921337	0.28946	0.0570362	0.404129	Not Detected	Not Detected	Not Detected	Not Detected	Not Detected	Not Detected	Not Detected	Not Detected	Not Detected	3	3	3	FALSE	A_30_P01018414	chr9:96947862-96967726_R										lincRNA:chr9:96947862-96967726 reverse strand	chr9:96948003-96947944	mm|9qE3.3
280	A_30_P01018429	0.0112224	0.00957798	0.0202347	0.0208264	0.0273652	0.0258742	0.0205659	0.0235171	0.0177806	0.0136784	0.0246886	0.0206212	1.80493	0.835252	0.851946	-0.259716	0.0934836	0.196179	Not Detected	Not Detected	Not Detected	Not Detected	Not Detected	Not Detected	Not Detected	Not Detected	Not Detected	3	3	3	FALSE	A_30_P01018429	chr9:67414463-67483185_F										lincRNA:chr9:67414463-67483185 forward strand	chr9:67455845-67455904	mm|9qC
281	A_30_P01018431	0.142053	0.135456	0.179895	0.192957	0.209492	0.187127	0.211603	0.167018	0.12886	0.152468	0.196525	0.16916	1.28896	0.860756	0.36621	-0.216324	0.0823694	0.359057	Detected	Detected	Detected	Detected	Detected	Detected	Detected	Detected	Detected	0	0	0	FALSE	A_30_P01018431	chr7:140012053-140012509_R										lincRNA:chr7:140012053-140012509 reverse strand	chr7:140012240-140012181	mm|7qF3
282	A_30_P01018433	0.0118366	0.0100488	0.0102041	0.0217266	0.439132	0.0272239	0.169532	0.0252921	0.0190146	0.0106965	0.162694	0.0712796	15.21	0.438121	3.92695	-1.1906	0.205186	0.762633	Not Detected	Not Detected	Not Detected	Not Detected	Detected	Not Detected	Detected	Not Detected	Not Detected	3	2	2	FALSE	A_30_P01018433	chr3:51990494-51991875_F										lincRNA:chr3:51990494-51991875 forward strand	chr3:51991816-51991875	mm|3qC
283	A_30_P01018435	0.0205398	0.0108279	0.010863	0.0319563	0.0313582	0.0292545	0.0228431	0.0267642	0.0220991	0.0140769	0.0308563	0.0239022	2.19198	0.774628	1.13224	-0.368425	0.057552	0.0324204	Not Detected	Not Detected	Not Detected	Not Detected	Not Detected	Not Detected	Not Detected	Not Detected	Not Detected	3	3	3	FALSE	A_30_P01018435	chr18:47327300-47333819_F										lincRNA:chr18:47327300-47333819 forward strand	chr18:47329131-47329190	mm|18qC
284	A_30_P01018455	0.087047	0.0744154	0.0881265	0.112882	0.135125	0.134272	0.11617	0.148491	0.106056	0.0831963	0.127426	0.123572	1.53163	0.969755	0.615071	-0.0443079	0.00615947	0.766549	Detected	Detected	Detected	Detected	Not Detected	Detected	Detected	Detected	Detected	0	1	0	FALSE	A_30_P01018455	chr8:122963590-122964126_F										lincRNA:chr8:122963590-122964126 forward strand	chr8:122963924-122963983	mm|8qE1
285	A_30_P01018456	0.0100311	0.00852253	0.00857843	0.0182257	0.0242339	0.0228095	0.0181321	0.0208513	0.0194687	0.00904403	0.0217564	0.0194841	2.40561	0.895556	1.2664	-0.159145	0.00222257	0.358121	Not Detected	Not Detected	Not Detected	Not Detected	Not Detected	Not Detected	Not Detected	Not Detected	Not Detected	3	3	3	FALSE	A_30_P01018456	chr9:36511566-36512137_R										lincRNA:chr9:36511566-36512137 reverse strand	chr9:36511731-36511672	mm|9qA4
286	A_30_P01018470	0.0392167	0.0614426	0.0560565	0.0210976	0.0279045	0.026573	0.0209077	0.0239569	0.0328707	0.0522386	0.0251917	0.0259118	0.482243	1.02858	-1.05217	0.0406588	0.0165704	0.920842	Not Detected	Detected	Detected	Not Detected	Not Detected	Not Detected	Not Detected	Not Detected	Not Detected	1	3	3	FALSE	A_30_P01018470	chr12:77550684-77551505_F										lincRNA:chr12:77550684-77551505 forward strand	chr12:77551052-77551111	mm|12qC3
287	A_30_P01018471	0.138625	0.125451	0.150412	0.173774	0.220456	0.194278	0.172893	0.192239	0.195194	0.138163	0.196169	0.186775	1.41984	0.952112	0.505732	-0.0707974	0.0179582	0.599686	Detected	Detected	Detected	Detected	Detected	Detected	Detected	Detected	Detected	0	0	0	FALSE	A_30_P01018471	chr17:8719950-8783850_R										lincRNA:chr17:8719950-8783850 reverse strand	chr17:8720972-8720913	mm|17qA1
288	A_30_P01018472	0.549721	0.42356	0.600429	0.355566	0.186005	0.258277	0.352331	0.399659	0.300538	0.52457	0.266616	0.350842	0.508257	1.31591	-0.976371	0.39606	0.043808	0.243509	Detected	Detected	Detected	Detected	Detected	Detected	Detected	Detected	Detected	0	0	0	FALSE	A_30_P01018472	chr17:56687541-56694616_R										lincRNA:chr17:56687541-56694616 reverse strand	chr17:56690913-56690854	mm|17qD
289	A_30_P01018482	0.183492	0.139457	0.223871	0.101908	0.098244	0.0903519	0.063067	0.0260939	0.0554817	0.182274	0.0968347	0.0482142	0.53126	0.497902	-0.91251	-1.00607	0.0390673	0.106571	Detected	Detected	Detected	Not Detected	Not Detected	Not Detected	Not Detected	Not Detected	Not Detected	0	3	3	FALSE	A_30_P01018482	chr12:5303823-5379098_R										lincRNA:chr12:5303823-5379098 reverse strand	chr12:5370664-5370605	mm|12qA1.1
290	A_30_P01018486	0.00945855	0.00807582	0.00816381	0.0174264	0.0232649	0.0220255	0.0174913	0.0203141	0.0149888	0.00856606	0.0209056	0.0175981	2.44051	0.841788	1.28719	-0.248472	0.00252158	0.23936	Not Detected	Not Detected	Not Detected	Not Detected	Not Detected	Not Detected	Not Detected	Not Detected	Not Detected	3	3	3	FALSE	A_30_P01018486	chr1:59449275-59474025_F										lincRNA:chr1:59449275-59474025 forward strand	chr1:59450350-59450409	mm|1qC1.3
291	A_30_P01018488	0.102622	0.098401	0.088433	0.0963502	0.0603829	0.11156	0.0550096	0.0907238	0.0921693	0.0964854	0.089431	0.0793009	0.926886	0.886728	-0.109537	-0.173437	0.62734	0.671347	Detected	Detected	Detected	Not Detected	Not Detected	Not Detected	Not Detected	Not Detected	Not Detected	0	3	3	FALSE	A_30_P01018488	chr3:68867193-68876128_R										lincRNA:chr3:68867193-68876128 reverse strand	chr3:68875114-68875055	mm|3qE1
292	A_30_P01018497	0.495335	0.507832	0.406145	0.385547	0.233198	0.443078	0.268095	0.283515	0.386433	0.469771	0.353941	0.312681	0.753433	0.883427	-0.408448	-0.178817	0.243911	0.681249	Detected	Detected	Detected	Detected	Detected	Detected	Detected	Detected	Detected	0	0	0	FALSE	A_30_P01018497	chr12:86415200-86415483_F										lincRNA:chr12:86415200-86415483 forward strand	chr12:86415279-86415338	mm|12qD2
293	A_30_P01018499	2.30517	2.27534	2.52041	6.01892	4.97354	4.44179	5.78274	5.16873	5.02535	2.36697	5.14475	5.32561	2.17356	1.03515	1.12006	0.0498443	0.00713744	0.708637	Detected	Detected	Detected	Detected	Detected	Detected	Detected	Detected	Detected	0	0	0	FALSE	A_30_P01018499	chr18:61809278-61825191_R										lincRNA:chr18:61809278-61825191 reverse strand	chr18:61809463-61809404	mm|18qE1
294	A_30_P01018506	0.387446	0.447822	0.378645	1.69981	1.32605	1.36821	1.14616	1.44531	0.840654	0.404638	1.46469	1.14404	3.61975	0.781082	1.85589	-0.356455	0.000368904	0.229836	Detected	Detected	Detected	Detected	Detected	Detected	Detected	Detected	Detected	0	0	0	FALSE	A_30_P01018506	chr9:113648970-113715170_R										lincRNA:chr9:113648970-113715170 reverse strand	chr9:113682858-113682799	mm|9qF3
295	A_30_P01018507	0.00951028	0.00815702	0.00824806	0.0176794	0.0235462	0.0223466	0.0177731	0.0204871	0.0148628	0.00863845	0.0211907	0.0177077	2.45307	0.835633	1.29459	-0.259059	0.00253781	0.231355	Not Detected	Not Detected	Not Detected	Not Detected	Not Detected	Not Detected	Not Detected	Not Detected	Not Detected	3	3	3	FALSE	A_30_P01018507	chrX:120784762-120785166_R										lincRNA:chrX:120784762-120785166 reverse strand	chrX:120785024-120784965	mm|XqE3
296	A_30_P01018510	0.0118495	0.0169066	0.0121677	0.021823	0.0290153	0.0270415	0.0307979	0.0249853	0.0325672	0.0136413	0.0259599	0.0294501	1.90304	1.13445	0.928306	0.181988	0.012425	0.34149	Not Detected	Not Detected	Not Detected	Not Detected	Not Detected	Not Detected	Not Detected	Not Detected	Not Detected	3	3	3	FALSE	A_30_P01018510	chr1:69566918-69567447_R										lincRNA:chr1:69566918-69567447 reverse strand	chr1:69567136-69567077	mm|1qC3
297	A_30_P01018511	0.0891875	0.0881905	0.0675095	0.202043	0.14506	0.14653	0.161407	0.241798	0.153803	0.0816292	0.164544	0.185669	2.01575	1.12838	1.01132	0.174259	0.00862453	0.571154	Detected	Detected	Detected	Detected	Detected	Detected	Detected	Detected	Detected	0	0	0	FALSE	A_30_P01018511	chr19:7458725-7474825_F										lincRNA:chr19:7458725-7474825 forward strand	chr19:7472937-7472996	mm|19qA
298	A_30_P01018513	0.552473	0.457432	0.487179	1.23586	1.1329	1.08001	0.961507	1.01048	1.12461	0.499028	1.14959	1.0322	2.30366	0.897885	1.20393	-0.155398	0.000449005	0.151118	Detected	Detected	Detected	Detected	Detected	Detected	Detected	Detected	Detected	0	0	0	FALSE	A_30_P01018513	chr15:33966641-34004891_R										lincRNA:chr15:33966641-34004891 reverse strand	chr15:33982943-33982884	mm|15qB3.1
299	A_30_P01018515	0.0868139	0.0935538	0.100165	0.0759634	0.03099	0.0591186	0.0229379	0.0297055	0.0329747	0.093511	0.0553574	0.0285394	0.591988	0.515548	-0.756361	-0.955822	0.155484	0.137748	Detected	Detected	Detected	Not Detected	Not Detected	Not Detected	Not Detected	Not Detected	Not Detected	0	3	3	FALSE	A_30_P01018515	chr8:42462791-42466106_R										lincRNA:chr8:42462791-42466106 reverse strand	chr8:42462911-42462852	mm|8qA4
300	A_30_P01018525	0.179199	0.154208	0.229317	0.381402	0.432366	0.40357	0.367409	0.522146	0.44485	0.187575	0.405779	0.444802	2.16329	1.09617	1.11323	0.132466	0.0144913	0.508171	Detected	Detected	Detected	Detected	Detected	Detected	Detected	Detected	Detected	0	0	0	FALSE	A_30_P01018525	chr14:43929100-43945100_R										lincRNA:chr14:43929100-43945100 reverse strand	chr14:43929384-43929325	mm|14qC1
301	A_30_P01018528	1.20344	1.08411	1.18847	1.79046	1.7944	1.47526	1.68903	1.75968	1.54275	1.15867	1.68671	1.66382	1.45572	0.986431	0.541734	-0.0197092	0.0148649	0.892517	Detected	Detected	Detected	Detected	Detected	Detected	Detected	Detected	Detected	0	0	0	FALSE	A_30_P01018528	chr17:88225376-88238756_R										lincRNA:chr17:88225376-88238756 reverse strand	chr17:88238731-88238672	mm|17qE4
302	A_30_P01018531	0.0129615	0.0109498	0.011047	0.0235604	0.0316588	0.0294064	0.0229268	0.0269671	0.0203473	0.0116528	0.0282085	0.0234137	2.42076	0.830024	1.27546	-0.268775	0.0023335	0.1997	Not Detected	Not Detected	Not Detected	Not Detected	Not Detected	Not Detected	Not Detected	Not Detected	Not Detected	3	3	3	FALSE	A_30_P01018531	chr7:129294998-129295498_F										lincRNA:chr7:129294998-129295498 forward strand	chr7:129295332-129295391	mm|7qF3
303	A_30_P01018532	0.0667364	0.0697621	0.0756894	0.253236	0.0763843	0.0957169	0.195996	0.0810737	0.0823227	0.0707293	0.141779	0.119798	2.00453	0.844959	1.00327	-0.243047	0.27088	0.817881	Detected	Detected	Detected	Detected	Not Detected	Not Detected	Detected	Not Detected	Not Detected	0	2	2	FALSE	A_30_P01018532	chr10:69669025-69686275_R										lincRNA:chr10:69669025-69686275 reverse strand	chr10:69682265-69682206	mm|10qB5.3
304	A_30_P01018536	0.0105803	0.00911811	0.00910604	0.0194611	0.0260536	0.0247291	0.0194372	0.416052	0.0169449	0.00960147	0.0234146	0.150811	2.43865	6.44091	1.28608	2.68726	0.00280034	0.525555	Not Detected	Not Detected	Not Detected	Not Detected	Not Detected	Not Detected	Not Detected	Detected	Not Detected	3	3	2	FALSE	A_30_P01018536	chr11:114686321-114705990_F										lincRNA:chr11:114686321-114705990 forward strand	chr11:114705891-114705950	mm|11qE2
305	A_30_P01018537	0.125099	0.115929	0.18878	0.179811	0.130943	0.168163	0.186046	0.193872	0.199303	0.143269	0.159639	0.193073	1.11426	1.20944	0.156084	0.274337	0.537336	0.171033	Detected	Detected	Detected	Detected	Not Detected	Detected	Detected	Detected	Detected	0	1	0	FALSE	A_30_P01018537	chr6:100162756-100178531_R										lincRNA:chr6:100162756-100178531 reverse strand	chr6:100174590-100174531	mm|6qD3
306	A_30_P01018544	0.0251814	0.0114992	0.0125815	0.0430991	0.031774	0.0555679	0.0717893	0.0543033	0.0431713	0.0164207	0.0434803	0.0564213	2.6479	1.29763	1.40485	0.375878	0.0337077	0.293072	Not Detected	Not Detected	Not Detected	Not Detected	Not Detected	Not Detected	Not Detected	Not Detected	Not Detected	3	3	3	FALSE	A_30_P01018544	chr2:45132558-45136718_F										lincRNA:chr2:45132558-45136718 forward strand	chr2:45136420-45136479	mm|2qB
307	A_30_P01018547	0.0573319	0.050101	0.0391889	0.0436193	0.0294334	0.0274881	0.0245006	0.0489784	0.0512368	0.048874	0.0335136	0.0415719	0.685715	1.24045	-0.544318	0.310862	0.105104	0.550469	Not Detected	Not Detected	Not Detected	Not Detected	Not Detected	Not Detected	Not Detected	Not Detected	Not Detected	3	3	3	FALSE	A_30_P01018547	chr5:73771801-73772662_F										lincRNA:chr5:73771801-73772662 forward strand	chr5:73772603-73772662	mm|5qC3.2
308	A_30_P01018549	0.0121386	0.0102197	0.0103003	0.0223198	0.0295979	0.0276632	0.0218667	0.0254628	0.0191529	0.0108862	0.026527	0.0221608	2.43675	0.835406	1.28496	-0.25945	0.00179541	0.203919	Not Detected	Not Detected	Not Detected	Not Detected	Not Detected	Not Detected	Not Detected	Not Detected	Not Detected	3	3	3	FALSE	A_30_P01018549	chr15:62164419-62165018_F										lincRNA:chr15:62164419-62165018 forward strand	chr15:62164893-62164952	mm|15qD1
309	A_30_P01018554	0.0117152	0.0099248	0.0100957	0.0215914	0.0284251	0.0266628	0.0212059	0.0243411	0.0185858	0.0105786	0.0255598	0.0213776	2.41618	0.836377	1.27273	-0.257774	0.00181475	0.193346	Not Detected	Not Detected	Not Detected	Not Detected	Not Detected	Not Detected	Not Detected	Not Detected	Not Detected	3	3	3	FALSE	A_30_P01018554	chr1:182180931-182186106_F										lincRNA:chr1:182180931-182186106 forward strand	chr1:182184868-182184927	mm|1qH4
310	A_30_P01018556	0.0297137	0.0432624	0.0566854	0.0673909	0.0492548	0.0262203	0.0597697	0.048715	0.0443128	0.0432205	0.047622	0.0509325	1.10184	1.06952	0.139914	0.0969581	0.869362	0.689806	Not Detected	Not Detected	Detected	Not Detected	Not Detected	Not Detected	Not Detected	Not Detected	Not Detected	2	3	3	FALSE	A_30_P01018556	chr3:30099759-30133959_F										lincRNA:chr3:30099759-30133959 forward strand	chr3:30125539-30125598	mm|3qA3
311	A_30_P01018559	0.0416735	0.0520777	0.0468401	0.237852	0.0396556	0.0269642	0.0213504	0.0245827	0.0189093	0.0468638	0.101491	0.0216141	2.16565	0.212967	1.1148	-2.2313	0.693834	0.247313	Not Detected	Detected	Not Detected	Detected	Not Detected	Not Detected	Not Detected	Not Detected	Not Detected	2	2	3	FALSE	A_30_P01018559	chr9:88333945-88342370_F										lincRNA:chr9:88333945-88342370 forward strand	chr9:88340717-88340776	mm|9qE3.1
312	A_30_P01018562	0.012351	0.0103611	0.0105023	0.0456294	0.0299503	0.0278171	0.0222268	0.0255288	0.0198382	0.0110715	0.0344656	0.0225313	3.11301	0.653732	1.63831	-0.613229	0.011036	0.102167	Not Detected	Not Detected	Not Detected	Not Detected	Not Detected	Not Detected	Not Detected	Not Detected	Not Detected	3	3	3	FALSE	A_30_P01018562	chr11:49932129-49938154_R										lincRNA:chr11:49932129-49938154 reverse strand	chr11:49933964-49933905	mm|11qB1.3
313	A_30_P01018564	0.0101981	0.0154625	0.00932679	0.0184866	0.0244714	0.0230631	0.0183038	0.0210911	0.0157768	0.0116625	0.022007	0.0183905	1.88699	0.835667	0.91609	-0.259	0.0329389	0.208008	Not Detected	Not Detected	Not Detected	Not Detected	Not Detected	Not Detected	Not Detected	Not Detected	Not Detected	3	3	3	FALSE	A_30_P01018564	chr18:5988500-6022000_R										lincRNA:chr18:5988500-6022000 reverse strand	chr18:6014679-6014620	mm|18qA1
314	A_30_P01018567	0.124737	0.153665	0.128707	0.0794036	0.0412824	0.0673703	0.0830383	0.106847	0.0605475	0.135703	0.0626854	0.0834775	0.461931	1.33169	-1.11425	0.413257	0.0435783	0.313528	Detected	Detected	Detected	Not Detected	Not Detected	Not Detected	Not Detected	Not Detected	Not Detected	0	3	3	FALSE	A_30_P01018567	chr3:145269449-145298239_F										lincRNA:chr3:145269449-145298239 forward strand	chr3:145271156-145271215	mm|3qH2
315	A_30_P01018573	0.0770858	0.0970919	0.0837941	0.0829427	0.0243432	0.023063	0.0182063	0.0279545	0.0159151	0.0859906	0.0434496	0.020692	0.505284	0.476229	-0.984835	-1.07027	0.170848	0.297631	Detected	Detected	Detected	Not Detected	Not Detected	Not Detected	Not Detected	Not Detected	Not Detected	0	3	3	FALSE	A_30_P01018573	chr3:127170996-127201096_R										lincRNA:chr3:127170996-127201096 reverse strand	chr3:127184375-127184316	mm|3qG2
316	A_30_P01018575	0.0103759	0.0104632	0.00892575	0.0189022	0.0250141	0.0237424	0.0187108	0.0855539	0.0163256	0.00992163	0.0225529	0.0401968	2.2731	1.78234	1.18466	0.833769	0.00278611	0.6504	Not Detected	Not Detected	Not Detected	Not Detected	Not Detected	Not Detected	Not Detected	Not Detected	Not Detected	3	3	3	FALSE	A_30_P01018575	chr3:125563727-125564266_F										lincRNA:chr3:125563727-125564266 forward strand	chr3:125564009-125564068	mm|3qG1
317	A_30_P01018576	0.228686	0.197687	0.223412	0.0882949	0.0287541	0.0266259	0.0364527	0.497107	0.102727	0.216595	0.0478917	0.212096	0.221111	4.42866	-2.17715	2.14687	0.0481704	0.286343	Detected	Detected	Detected	Not Detected	Not Detected	Not Detected	Not Detected	Detected	Detected	0	3	1	FALSE	A_30_P01018576	chrX:11690182-11690581_R										lincRNA:chrX:11690182-11690581 reverse strand	chrX:11690353-11690294	mm|XqA1.1
318	A_30_P01018582	0.0214983	0.0159392	0.0109108	0.0234758	0.0312601	0.0290971	0.0375344	0.026449	0.0194274	0.0161161	0.0279443	0.0278036	1.73394	0.994965	0.794053	-0.00728176	0.0806819	0.881976	Not Detected	Not Detected	Not Detected	Not Detected	Not Detected	Not Detected	Not Detected	Not Detected	Not Detected	3	3	3	FALSE	A_30_P01018582	chr12:52944867-52971992_R										lincRNA:chr12:52944867-52971992 reverse strand	chr12:52966812-52966753	mm|12qC1
319	A_30_P01018588	0.0764609	0.103364	0.093471	0.0421384	0.0360096	0.0274313	0.0851493	0.0419426	0.0601523	0.0910985	0.0351931	0.0624147	0.386319	1.77349	-1.37214	0.826595	0.0047338	0.0983383	Detected	Detected	Detected	Not Detected	Not Detected	Not Detected	Not Detected	Not Detected	Not Detected	0	3	3	FALSE	A_30_P01018588	chr2:175640275-175701875_F										lincRNA:chr2:175640275-175701875 forward strand	chr2:175691592-175691651	mm|2qH4
320	A_30_P01018592	0.0104245	0.00890967	0.00901778	0.0192977	0.0257135	0.0243056	0.0192597	0.022092	0.0159839	0.00945065	0.0231056	0.0191118	2.44487	0.827152	1.28976	-0.273776	0.00243995	0.21167	Not Detected	Not Detected	Not Detected	Not Detected	Not Detected	Not Detected	Not Detected	Not Detected	Not Detected	3	3	3	FALSE	A_30_P01018592	chr1:93755492-93755943_R										lincRNA:chr1:93755492-93755943 reverse strand	chr1:93755819-93755760	mm|1qD
321	A_30_P01018595	0.0117595	0.00995929	0.0101352	0.0212747	0.0285404	0.0270059	0.0212681	0.0245679	0.0188135	0.010618	0.025607	0.0215499	2.41166	0.841562	1.27003	-0.248859	0.00270167	0.22554	Not Detected	Not Detected	Not Detected	Not Detected	Not Detected	Not Detected	Not Detected	Not Detected	Not Detected	3	3	3	FALSE	A_30_P01018595	chr2:131529950-131550900_R										lincRNA:chr2:131529950-131550900 reverse strand	chr2:131541509-131541450	mm|2qF1
322	A_30_P01018596	0.109828	0.114252	0.130326	0.193288	0.199788	0.215106	0.108097	0.201891	0.0925839	0.118135	0.202727	0.13419	1.71606	0.661926	0.779099	-0.595259	0.0019836	0.184651	Detected	Detected	Detected	Detected	Detected	Detected	Detected	Detected	Detected	0	0	0	FALSE	A_30_P01018596	chr1:185808525-185826139_R										lincRNA:chr1:185808525-185826139 reverse strand	chr1:185826110-185826051	mm|1qH5
323	A_30_P01018597	0.021896	0.156466	0.0178489	0.0350482	0.0582029	0.0315976	0.0210909	0.0242103	0.0536545	0.0654036	0.0416162	0.0329852	0.636299	0.792606	-0.652224	-0.335325	0.982443	0.464229	Not Detected	Detected	Not Detected	Not Detected	Not Detected	Not Detected	Not Detected	Not Detected	Not Detected	2	3	3	FALSE	A_30_P01018597	chrX:121493684-121500532_F										lincRNA:chrX:121493684-121500532 forward strand	chrX:121499267-121499326	mm|XqE3
324	A_30_P01018601	0.0093712	0.0161696	0.0111499	0.0172896	0.0231444	0.0219459	0.020617	0.0200789	0.163084	0.0122302	0.0207933	0.0679267	1.70015	3.26676	0.765664	1.70786	0.0553439	0.43081	Not Detected	Not Detected	Not Detected	Not Detected	Not Detected	Not Detected	Not Detected	Not Detected	Detected	3	3	2	FALSE	A_30_P01018601	chr1:167797581-167803031_F										lincRNA:chr1:167797581-167803031 forward strand	chr1:167802728-167802787	mm|1qH2.3
325	A_30_P01018611	0.880128	0.791603	1.09777	1.24752	1.78633	1.74854	1.82126	2.11757	1.35795	0.923168	1.59413	1.76559	1.72681	1.10756	0.788106	0.147382	0.0242186	0.603244	Detected	Detected	Detected	Detected	Detected	Detected	Detected	Detected	Detected	0	0	0	FALSE	A_30_P01018611	chr14:78957377-78962977_R										lincRNA:chr14:78957377-78962977 reverse strand	chr14:78959124-78959065	mm|14qD3
326	A_30_P01018617	56.9442	53.2157	50.1647	26.4484	55.5371	47.4288	68.8055	68.1569	44.4977	53.4415	43.1381	60.4867	0.807202	1.40216	-0.308999	0.487655	0.368081	0.255166	Detected	Detected	Detected	Detected	Detected	Detected	Detected	Detected	Detected	0	0	0	FALSE	A_30_P01018617	chr6:86425510-86450160_R										lincRNA:chr6:86425510-86450160 reverse strand	chr6:86446458-86446399	mm|6qD1
327	A_30_P01018619	0.0114234	0.0104877	0.00986018	0.0212265	0.0277524	0.0260458	0.0207391	0.0238937	0.0178904	0.0105904	0.0250082	0.0208411	2.3614	0.833369	1.23964	-0.262973	0.00248037	0.191013	Not Detected	Not Detected	Not Detected	Not Detected	Not Detected	Not Detected	Not Detected	Not Detected	Not Detected	3	3	3	FALSE	A_30_P01018619	chr13:67806242-67830110_R										lincRNA:chr13:67806242-67830110 reverse strand	chr13:67806658-67806599	mm|13qB3
328	A_30_P01018620	2.78059	2.37946	2.76961	11.9107	9.15309	7.97202	6.28949	7.55301	7.09894	2.64322	9.67862	6.98048	3.66168	0.721227	1.8725	-0.471475	0.00312244	0.0988442	Detected	Detected	Detected	Detected	Detected	Detected	Detected	Detected	Detected	0	0	0	FALSE	A_30_P01018620	chr17:39980973-39981876_R										lincRNA:chr17:39980973-39981876 reverse strand	chr17:39981446-39981387	mm|17qB1
329	A_30_P01018623	0.239755	0.261157	0.21438	0.907569	0.734476	0.684873	0.536909	0.677137	0.404408	0.238431	0.775639	0.539485	3.2531	0.695536	1.70182	-0.523803	0.0006531	0.110034	Detected	Detected	Detected	Detected	Detected	Detected	Detected	Detected	Detected	0	0	0	FALSE	A_30_P01018623	chr5:124667541-124700029_F										lincRNA:chr5:124667541-124700029 forward strand	chr5:124695426-124695485	mm|5qF
330	A_30_P01018624	0.133636	0.123697	0.170476	0.0621161	0.0248546	0.0235447	0.0267162	0.0217431	0.0162881	0.142603	0.0368384	0.0215825	0.258329	0.585868	-1.95272	-0.771352	0.0347216	0.291245	Detected	Detected	Detected	Not Detected	Not Detected	Not Detected	Not Detected	Not Detected	Not Detected	0	3	3	FALSE	A_30_P01018624	chr3:108763862-108772151_R										lincRNA:chr3:108763862-108772151 reverse strand	chr3:108766872-108766813	mm|3qF3
331	A_30_P01018625	0.0936195	0.0199742	0.0125884	0.0637076	0.0319439	0.0582408	0.0401224	0.0441726	0.0377878	0.0420607	0.0512975	0.0406943	1.21961	0.7933	0.286415	-0.334062	0.475253	0.474324	Detected	Not Detected	Not Detected	Not Detected	Not Detected	Not Detected	Not Detected	Not Detected	Not Detected	2	3	3	FALSE	A_30_P01018625	chr12:45415565-45423519_R										lincRNA:chr12:45415565-45423519 reverse strand
332	A_30_P01018630	0.010111	0.00865402	0.0086825	0.0183712	0.0243079	0.0230379	0.0182134	0.0211203	0.0158057	0.00914918	0.0219057	0.0183798	2.39428	0.839044	1.25959	-0.253182	0.00228702	0.217402	Not Detected	Not Detected	Not Detected	Not Detected	Not Detected	Not Detected	Not Detected	Not Detected	Not Detected	3	3	3	FALSE	A_30_P01018630	chr18:46961860-46962372_F										lincRNA:chr18:46961860-46962372 forward strand	chr18:46961901-46961960	mm|18qC
333	A_30_P01018632	0.283963	0.299004	0.34957	0.515423	0.873559	1.01286	0.398279	0.82969	0.41995	0.310846	0.800612	0.549307	2.57559	0.686108	1.36491	-0.543493	0.0376981	0.274947	Detected	Detected	Detected	Detected	Detected	Detected	Detected	Detected	Detected	0	0	0	FALSE	A_30_P01018632	chr8:124713947-124714299_F										lincRNA:chr8:124713947-124714299 forward strand	chr8:124714228-124714287	mm|8qE1
334	A_30_P01018656	0.375903	0.523344	0.55118	0.754887	0.747695	0.619331	1.17291	0.666888	0.856578	0.483476	0.707304	0.898793	1.46296	1.27073	0.548887	0.345657	0.0625507	0.316421	Detected	Detected	Detected	Detected	Detected	Detected	Detected	Detected	Detected	0	0	0	FALSE	A_30_P01018656	chr17:22420025-22457650_F										lincRNA:chr17:22420025-22457650 forward strand	chr17:22452022-22452081	mm|17qA3.3
335	A_30_P01018664	0.133647	0.107553	0.108464	0.203354	0.110629	0.0402837	0.982171	0.0652095	0.122589	0.116555	0.118089	0.38999	1.01316	3.30251	0.0188651	1.72356	0.739885	0.498847	Detected	Detected	Detected	Detected	Not Detected	Not Detected	Detected	Not Detected	Detected	0	2	1	FALSE	A_30_P01018664	chr3:35782698-35789932_R										lincRNA:chr3:35782698-35789932 reverse strand	chr3:35789087-35789028	mm|3qB
336	A_30_P01018668	0.0134934	0.0236649	0.029062	0.0638754	0.0313774	0.0334324	0.0309766	0.0453286	0.0255698	0.0220735	0.0428951	0.0339583	1.94329	0.791661	0.958498	-0.337046	0.110724	0.505869	Not Detected	Not Detected	Not Detected	Not Detected	Not Detected	Not Detected	Not Detected	Not Detected	Not Detected	3	3	3	FALSE	A_30_P01018668	chr11:119794849-119803349_R										lincRNA:chr11:119794849-119803349 reverse strand	chr11:119797436-119797377	mm|11qE2
337	A_30_P01018669	0.0106365	0.00901303	0.0091353	0.0197764	0.026157	0.0244834	0.0194949	0.0226752	0.0168271	0.00959494	0.0234722	0.0196658	2.44631	0.837831	1.29061	-0.25527	0.00184623	0.215171	Not Detected	Not Detected	Not Detected	Not Detected	Not Detected	Not Detected	Not Detected	Not Detected	Not Detected	3	3	3	FALSE	A_30_P01018669	chr3:93570498-93588934_F										lincRNA:chr3:93570498-93588934 forward strand	chr3:93588875-93588934	mm|3qF2.1
338	A_30_P01018681	2.69071	2.29898	2.41701	6.48829	5.45927	5.01275	4.10205	4.96209	4.30617	2.4689	5.65344	4.45677	2.28986	0.788329	1.19526	-0.343131	0.00175892	0.0732027	Detected	Detected	Detected	Detected	Detected	Detected	Detected	Detected	Detected	0	0	0	FALSE	A_30_P01018681	chr5:125861675-125880125_F										lincRNA:chr5:125861675-125880125 forward strand	chr5:125866713-125866772	mm|5qG1.1
339	A_30_P01018682	0.0660921	0.0731368	0.0550699	0.0600382	0.0304543	0.0285838	0.0797645	0.0829774	0.0468064	0.0647663	0.0396921	0.0698494	0.612851	1.75978	-0.706391	0.815397	0.138575	0.124212	Detected	Detected	Detected	Not Detected	Not Detected	Not Detected	Not Detected	Not Detected	Not Detected	0	3	3	FALSE	A_30_P01018682	chr18:54122285-54122917_F										lincRNA:chr18:54122285-54122917 forward strand	chr18:54122702-54122761	mm|18qD2
340	A_30_P01018685	0.207641	0.209483	0.22619	0.674405	0.553652	0.522182	0.505806	0.378108	0.335131	0.214438	0.583413	0.406348	2.72066	0.696502	1.44396	-0.5218	0.00282575	0.073551	Detected	Detected	Detected	Detected	Detected	Detected	Detected	Detected	Detected	0	0	0	FALSE	A_30_P01018685	chr2:156654675-156665430_R										lincRNA:chr2:156654675-156665430 reverse strand	chr2:156665223-156665164	mm|2qH1
341	A_30_P01018687	0.442895	0.424504	0.403158	0.630549	0.596033	0.406016	0.55937	0.571946	0.512664	0.423519	0.544199	0.547993	1.28495	1.00697	0.361708	0.0100234	0.230888	0.879791	Detected	Detected	Detected	Detected	Detected	Detected	Detected	Detected	Detected	0	0	0	FALSE	A_30_P01018687	chr1:161969026-162001640_F										lincRNA:chr1:161969026-162001640 forward strand	chr1:161974626-161974685	mm|1qH2.1
342	A_30_P01018690	0.0153468	0.0211213	0.0253749	0.0173302	0.0231941	0.021952	0.0174514	0.0200805	0.0147338	0.0206143	0.0208254	0.0174219	1.01024	0.836569	0.0146987	-0.257443	0.899567	0.23079	Not Detected	Not Detected	Not Detected	Not Detected	Not Detected	Not Detected	Not Detected	Not Detected	Not Detected	3	3	3	FALSE	A_30_P01018690	chrX:132445535-132448486_F										lincRNA:chrX:132445535-132448486 forward strand	chrX:132448427-132448486	mm|XqF1
343	A_30_P01018692	0.0188893	0.0196513	0.037557	0.0413909	0.0421253	0.0273285	0.0420483	0.108269	0.0325377	0.0253659	0.0369482	0.0609518	1.45661	1.64965	0.542618	0.722163	0.208046	0.4161	Not Detected	Not Detected	Not Detected	Not Detected	Not Detected	Not Detected	Not Detected	Not Detected	Not Detected	3	3	3	FALSE	A_30_P01018692	chr11:18479852-18485704_R										lincRNA:chr11:18479852-18485704 reverse strand	chr11:18483543-18483484	mm|11qA3.1
344	A_30_P01018700	0.0113144	0.00968415	0.00977761	0.0210153	0.0277993	0.0263714	0.0207832	0.0238394	0.0174245	0.0102587	0.025062	0.0206824	2.44299	0.82525	1.28865	-0.277097	0.00219999	0.197251	Not Detected	Not Detected	Not Detected	Not Detected	Not Detected	Not Detected	Not Detected	Not Detected	Not Detected	3	3	3	FALSE	A_30_P01018700	chr12:103151449-103153545_F										lincRNA:chr12:103151449-103153545 forward strand	chr12:103152859-103152918	mm|12qE
345	A_30_P01018701	0.228519	0.197923	0.198167	0.355438	0.26988	0.279738	0.367464	0.264583	0.273605	0.208203	0.301685	0.301884	1.449	1.00066	0.535055	0.000951483	0.0321027	0.983962	Detected	Detected	Detected	Detected	Detected	Detected	Detected	Detected	Detected	0	0	0	FALSE	A_30_P01018701	chr9:32156266-32169196_F										lincRNA:chr9:32156266-32169196 forward strand	chr9:32169123-32169182	mm|9qA4
346	A_30_P01018704	0.0115284	0.00977532	0.00992389	0.0212811	0.0283305	0.0265368	0.0354607	0.0241046	0.0175715	0.0104092	0.0253828	0.0257123	2.4385	1.01298	1.28599	0.0186058	0.00214291	0.930601	Not Detected	Not Detected	Not Detected	Not Detected	Not Detected	Not Detected	Not Detected	Not Detected	Not Detected	3	3	3	FALSE	A_30_P01018704	chr6:121036929-121037581_R										lincRNA:chr6:121036929-121037581 reverse strand	chr6:121037123-121037064	mm|6qF1
347	A_30_P01018705	0.0125633	0.016313	0.0218791	0.0228698	0.0307795	0.029027	0.0226844	0.0263868	0.0197934	0.0169185	0.0275588	0.0229549	1.62892	0.832942	0.703914	-0.263712	0.066945	0.214488	Not Detected	Not Detected	Not Detected	Not Detected	Not Detected	Not Detected	Not Detected	Not Detected	Not Detected	3	3	3	FALSE	A_30_P01018705	chr11:33442089-33444467_R										lincRNA:chr11:33442089-33444467 reverse strand	chr11:33442251-33442192	mm|11qA4
348	A_30_P01018707	0.0139533	0.009111	0.00907339	0.0210113	0.0379428	0.0243406	0.0191878	0.0222734	0.0197875	0.0107126	0.0277649	0.0204162	2.59181	0.735324	1.37396	-0.443547	0.0159191	0.256138	Not Detected	Not Detected	Not Detected	Not Detected	Not Detected	Not Detected	Not Detected	Not Detected	Not Detected	3	3	3	FALSE	A_30_P01018707	chr15:79709500-79714700_F										lincRNA:chr15:79709500-79714700 forward strand	chr15:79713752-79713811	mm|15qE1
349	A_30_P01018713	0.0973379	0.0753243	0.0989671	0.0422323	0.0262006	0.0245492	0.0216878	0.0227924	0.0306968	0.0905431	0.030994	0.025059	0.342312	0.808512	-1.54662	-0.306658	0.0108001	0.401181	Detected	Detected	Detected	Not Detected	Not Detected	Not Detected	Not Detected	Not Detected	Not Detected	0	3	3	FALSE	A_30_P01018713	chr14:79725080-79725434_R										lincRNA:chr14:79725080-79725434 reverse strand	chr14:79725380-79725321	mm|14qD3
350	A_30_P01018717	0.0329135	0.0176316	0.0192339	0.0214367	0.0285801	0.0266823	0.0364884	0.0258879	0.0177438	0.0232597	0.0255664	0.0267067	1.09917	1.0446	0.136416	0.062954	0.596784	0.973119	Not Detected	Not Detected	Not Detected	Not Detected	Not Detected	Not Detected	Not Detected	Not Detected	Not Detected	3	3	3	FALSE	A_30_P01018717	chr6:47928244-47928681_R										lincRNA:chr6:47928244-47928681 reverse strand	chr6:47928547-47928488	mm|6qB2.3
351	A_30_P01018721	0.172757	0.16928	0.201353	0.39212	0.264565	0.35227	0.209018	0.244452	0.249977	0.18113	0.336319	0.234482	1.85678	0.697202	0.892801	-0.520351	0.0207743	0.0779389	Detected	Detected	Detected	Detected	Detected	Detected	Detected	Detected	Detected	0	0	0	FALSE	A_30_P01018721	chr3:95502970-95503399_R										lincRNA:chr3:95502970-95503399 reverse strand	chr3:95503091-95503032	mm|3qF2.1
352	A_30_P01018726	0.360271	0.370095	0.363475	0.103706	0.0664491	0.088765	0.0626612	0.0930648	0.112878	0.364614	0.0863066	0.0895348	0.236707	1.0374	-2.07883	0.0529774	0.00773734	0.916032	Detected	Detected	Detected	Not Detected	Not Detected	Not Detected	Not Detected	Not Detected	Detected	0	3	2	FALSE	A_30_P01018726	chr10:6497224-6497863_R										lincRNA:chr10:6497224-6497863 reverse strand	chr10:6497478-6497419	mm|10qA1
353	A_30_P01018733	0.0129603	0.00849902	0.0108874	0.0183683	0.0245634	0.0232129	0.018434	0.0211486	0.0153444	0.0107822	0.0220482	0.018309	2.04487	0.830407	1.03201	-0.268109	0.0110154	0.22049	Not Detected	Not Detected	Not Detected	Not Detected	Not Detected	Not Detected	Not Detected	Not Detected	Not Detected	3	3	3	FALSE	A_30_P01018733	chr5:45400409-45815639_R										lincRNA:chr5:45400409-45815639 reverse strand	chr5:45400977-45400918	mm|5qB3
354	A_30_P01018734	0.0301059	0.0317924	0.057604	0.0539345	0.0283626	0.0266995	0.0389043	0.0537149	0.0641971	0.0398341	0.0363322	0.0522721	0.912088	1.43873	-0.132755	0.524792	0.760463	0.22503	Not Detected	Not Detected	Detected	Not Detected	Not Detected	Not Detected	Not Detected	Not Detected	Not Detected	2	3	3	FALSE	A_30_P01018734	chr6:86477309-86537554_R										lincRNA:chr6:86477309-86537554 reverse strand	chr6:86515373-86515314	mm|6qD1
355	A_30_P01018741	0.0257607	0.0380587	0.0280843	0.0339767	0.022864	0.0216826	0.017234	0.0199116	0.023286	0.0306346	0.0261745	0.0201438	0.854409	0.769599	-0.227001	-0.37782	0.426562	0.223202	Not Detected	Not Detected	Not Detected	Not Detected	Not Detected	Not Detected	Not Detected	Not Detected	Not Detected	3	3	3	FALSE	A_30_P01018741	chr14:79304650-79345152_F										lincRNA:chr14:79304650-79345152 forward strand	chr14:79315052-79315111	mm|14qD3
356	A_30_P01018744	0.248393	0.244848	0.266455	0.390952	0.310045	0.203618	0.369113	0.221527	0.222547	0.253232	0.301538	0.271062	1.19076	0.898931	0.251883	-0.153718	0.54006	0.71124	Detected	Detected	Detected	Detected	Detected	Detected	Detected	Detected	Detected	0	0	0	FALSE	A_30_P01018744	chr18:63455560-63548085_F										lincRNA:chr18:63455560-63548085 forward strand	chr18:63526547-63526606	mm|18qE1
357	A_30_P01018745	0.0606399	0.0773597	0.0644345	0.0219009	0.0291909	0.0271169	0.0216065	0.0247432	0.0245376	0.067478	0.0260696	0.0236291	0.386341	0.906388	-1.37205	-0.1418	0.00121426	0.407989	Detected	Detected	Detected	Not Detected	Not Detected	Not Detected	Not Detected	Not Detected	Not Detected	0	3	3	FALSE	A_30_P01018745	chr4:3746573-3746891_F										lincRNA:chr4:3746573-3746891 forward strand	chr4:3746726-3746785	mm|4qA1
358	A_30_P01018748	0.022672	0.0394577	0.0348683	0.019873	0.0843548	0.0265546	0.0352867	0.0790671	0.0524821	0.0323327	0.0435942	0.0556119	1.3483	1.27567	0.431142	0.351259	0.820573	0.484132	Not Detected	Not Detected	Not Detected	Not Detected	Not Detected	Not Detected	Not Detected	Not Detected	Not Detected	3	3	3	FALSE	A_30_P01018748	chr3:9635102-9661327_R										lincRNA:chr3:9635102-9661327 reverse strand	chr3:9656730-9656671	mm|3qA1
359	A_30_P01018750	0.0108931	0.0148415	0.0118421	0.0200208	0.442587	0.025306	0.275343	0.189131	0.625484	0.0125255	0.162638	0.363319	12.9845	2.23391	3.69872	1.15957	0.251028	0.231833	Not Detected	Not Detected	Not Detected	Not Detected	Detected	Not Detected	Detected	Detected	Detected	3	2	0	FALSE	A_30_P01018750	chr10:121498271-121512171_R										lincRNA:chr10:121498271-121512171 reverse strand	chr10:121506323-121506264	mm|10qD2
360	A_30_P01018751	0.04539	0.0541209	0.0541269	0.0347228	0.02501	0.0234442	0.0186611	0.0214255	0.0159779	0.0512126	0.0277257	0.0186882	0.541385	0.674039	-0.885274	-0.569097	0.0206575	0.0668357	Not Detected	Detected	Detected	Not Detected	Not Detected	Not Detected	Not Detected	Not Detected	Not Detected	1	3	3	FALSE	A_30_P01018751	chr9:55921147-55921563_F										lincRNA:chr9:55921147-55921563 forward strand	chr9:55921215-55921274	mm|9qB
361	A_30_P01018752	0.0454131	0.0488203	0.0589934	0.0695646	0.0851593	0.0857084	0.0477751	0.095458	0.0317362	0.0510756	0.0801441	0.0583231	1.56913	0.727728	0.649962	-0.458529	0.0125586	0.32177	Not Detected	Detected	Detected	Not Detected	Not Detected	Not Detected	Not Detected	Not Detected	Not Detected	1	3	3	FALSE	A_30_P01018752	chr4:11899775-11931875_R										lincRNA:chr4:11899775-11931875 reverse strand	chr4:11921133-11921074	mm|4qA1
362	A_30_P01018753	0.0113805	0.00960025	0.00972282	0.0209204	0.0278308	0.0259596	0.020491	0.0240879	0.0181336	0.0102345	0.0249036	0.0209042	2.4333	0.839402	1.28291	-0.252566	0.00196297	0.216021	Not Detected	Not Detected	Not Detected	Not Detected	Not Detected	Not Detected	Not Detected	Not Detected	Not Detected	3	3	3	FALSE	A_30_P01018753	chr7:67111261-67120645_F										lincRNA:chr7:67111261-67120645 forward strand	chr7:67120516-67120575	mm|7qC
363	A_30_P01018758	0.0124218	0.0104544	0.0106297	0.0228535	0.03045	0.0283119	0.0225393	0.0257882	0.0189484	0.0111686	0.0272051	0.0224253	2.43585	0.824305	1.28443	-0.27875	0.00196736	0.193093	Not Detected	Not Detected	Not Detected	Not Detected	Not Detected	Not Detected	Not Detected	Not Detected	Not Detected	3	3	3	FALSE	A_30_P01018758	chr7:50833970-50850878_R										lincRNA:chr7:50833970-50850878 reverse strand	chr7:50846790-50846731	mm|7qB4
364	A_30_P01018759	0.0102739	0.00885079	0.00893414	0.0191894	0.0252657	0.0240653	0.0190844	0.0219265	0.0159336	0.00935293	0.0228401	0.0189815	2.44203	0.83106	1.28808	-0.266975	0.00223166	0.211637	Not Detected	Not Detected	Not Detected	Not Detected	Not Detected	Not Detected	Not Detected	Not Detected	Not Detected	3	3	3	FALSE	A_30_P01018759	chr2:117781720-117937595_R										lincRNA:chr2:117781720-117937595 reverse strand	chr2:117819407-117819348	mm|2qE5
365	A_30_P01018760	0.404363	0.419547	0.491318	0.63651	1.12644	0.795153	0.722235	0.962457	0.851167	0.438409	0.852701	0.845286	1.94499	0.991304	0.959763	-0.0126005	0.0480582	0.951193	Detected	Detected	Detected	Detected	Detected	Detected	Detected	Detected	Detected	0	0	0	FALSE	A_30_P01018760	chr15:79764481-79809909_R										lincRNA:chr15:79764481-79809909 reverse strand	chr15:79764758-79764699	mm|15qE1
366	A_30_P01018770	0.132517	0.128316	0.148065	0.206069	0.404882	0.249023	0.256166	0.262612	0.317164	0.1363	0.286658	0.278647	2.10315	0.972055	1.07255	-0.04089	0.066962	0.969866	Detected	Detected	Detected	Detected	Detected	Detected	Detected	Detected	Detected	0	0	0	FALSE	A_30_P01018770	chr18:24239025-24246898_F										lincRNA:chr18:24239025-24246898 forward strand	chr18:24240415-24240474	mm|18qA2
367	A_30_P01018771	3.91031	3.47797	3.21365	2.35509	0.666696	1.29419	1.51887	0.66356	1.12383	3.53398	1.43866	1.10209	0.407094	0.76605	-1.29657	-0.384489	0.103618	0.682384	Detected	Detected	Detected	Detected	Detected	Detected	Detected	Detected	Detected	0	0	0	FALSE	A_30_P01018771	chr13:48620882-48643532_R										lincRNA:chr13:48620882-48643532 reverse strand	chr13:48631028-48630969	mm|13qA5
368	A_30_P01018779	0.0793646	0.0852581	0.0809275	0.0774118	0.0299446	0.0278559	0.0649657	0.0482523	0.0549232	0.08185	0.0450708	0.0560471	0.55065	1.24353	-0.860791	0.314447	0.162382	0.4276	Detected	Detected	Detected	Not Detected	Not Detected	Not Detected	Not Detected	Not Detected	Not Detected	0	3	3	FALSE	A_30_P01018779	chr2:174787150-174866550_R										lincRNA:chr2:174787150-174866550 reverse strand	chr2:174844782-174844723	mm|2qH4
369	A_30_P01018786	0.315314	0.27891	0.46607	0.503214	0.480698	0.60551	0.558287	0.62148	0.452568	0.353431	0.529807	0.544111	1.49904	1.027	0.584038	0.0384342	0.0942187	0.853004	Detected	Detected	Detected	Detected	Detected	Detected	Detected	Detected	Detected	0	0	0	FALSE	A_30_P01018786	chr3:90425270-90435820_F										lincRNA:chr3:90425270-90435820 forward strand	chr3:90428205-90428264	mm|3qF1
370	A_30_P01018787	0.0114262	0.0325497	0.00986682	0.0228668	0.0277589	0.0261006	0.0207727	0.0257573	0.0179415	0.0179476	0.0255754	0.0214905	1.425	0.84028	0.510966	-0.251058	0.312215	0.22293	Not Detected	Not Detected	Not Detected	Not Detected	Not Detected	Not Detected	Not Detected	Not Detected	Not Detected	3	3	3	FALSE	A_30_P01018787	chr14:65720392-65769859_R										lincRNA:chr14:65720392-65769859 reverse strand
371	A_30_P01018791	0.0234303	0.0351089	0.0226285	0.0192773	0.0256004	0.0243068	0.0191244	0.022327	0.0166925	0.0270559	0.0230615	0.0193813	0.852365	0.840418	-0.230457	-0.250822	0.435985	0.225254	Not Detected	Not Detected	Not Detected	Not Detected	Not Detected	Not Detected	Not Detected	Not Detected	Not Detected	3	3	3	FALSE	A_30_P01018791	chr6:112552041-112560067_R										lincRNA:chr6:112552041-112560067 reverse strand	chr6:112559167-112559108	mm|6qE3
372	A_30_P01018800	0.130864	0.12453	0.136764	0.272585	0.197628	0.184493	0.250896	0.17875	0.132345	0.130719	0.218235	0.18733	1.6695	0.858386	0.739413	-0.220301	0.0476651	0.485879	Detected	Detected	Detected	Detected	Detected	Detected	Detected	Detected	Detected	0	0	0	FALSE	A_30_P01018800	chr5:112220574-112234709_F										lincRNA:chr5:112220574-112234709 forward strand	chr5:112234588-112234647	mm|5qF
373	A_30_P01018806	0.00961632	0.00820631	0.00829458	0.0176724	0.0235633	0.0222981	0.0176799	0.0205878	0.0152656	0.00870574	0.0211779	0.0178445	2.43264	0.842597	1.28252	-0.247085	0.00247153	0.237741	Not Detected	Not Detected	Not Detected	Not Detected	Not Detected	Not Detected	Not Detected	Not Detected	Not Detected	3	3	3	FALSE	A_30_P01018806	chr2:104398943-104412968_F										lincRNA:chr2:104398943-104412968 forward strand	chr2:104412462-104412521	mm|2qE2
374	A_30_P01018807	4.90314	4.3792	4.37198	5.43973	9.02615	7.938	7.60797	9.00074	8.86238	4.55144	7.46796	8.49036	1.64079	1.13691	0.71439	0.185113	0.0812669	0.439582	Detected	Detected	Detected	Detected	Detected	Detected	Detected	Detected	Detected	0	0	0	FALSE	A_30_P01018807	chr6:67155508-67216941_R										lincRNA:chr6:67155508-67216941 reverse strand	chr6:67156019-67155960	mm|6qC1
375	A_30_P01018811	0.0225518	0.0213894	0.0162553	0.0590262	0.0310347	0.0228387	0.0246747	0.0230119	0.0156197	0.0200655	0.0376332	0.0211021	1.87552	0.56073	0.907288	-0.834621	0.174788	0.198953	Not Detected	Not Detected	Not Detected	Not Detected	Not Detected	Not Detected	Not Detected	Not Detected	Not Detected	3	3	3	FALSE	A_30_P01018811	chr13:98270713-98272269_F										lincRNA:chr13:98270713-98272269 forward strand	chr13:98270739-98270798	mm|13qD1
376	A_30_P01018816	0.0128075	0.0108619	0.0110179	0.0429316	0.0316865	0.0296875	0.0236206	0.0267813	0.0240455	0.0115624	0.0347685	0.0248158	3.00703	0.713743	1.58834	-0.486524	0.00402726	0.0906442	Not Detected	Not Detected	Not Detected	Not Detected	Not Detected	Not Detected	Not Detected	Not Detected	Not Detected	3	3	3	FALSE	A_30_P01018816	chr2:173420987-173480087_F										lincRNA:chr2:173420987-173480087 forward strand	chr2:173441601-173441660	mm|2qH4
377	A_30_P01018817	0.0616261	0.0773499	0.0776302	0.0896918	0.0376989	0.033468	0.0546465	0.114354	0.0564558	0.0722021	0.0536196	0.075152	0.742632	1.40158	-0.429281	0.487052	0.330742	0.392718	Detected	Detected	Detected	Not Detected	Not Detected	Not Detected	Not Detected	Not Detected	Not Detected	0	3	3	FALSE	A_30_P01018817	chr1:182808654-182815659_R										lincRNA:chr1:182808654-182815659 reverse strand	chr1:182808983-182808924	mm|1qH4
378	A_30_P01018822	0.0534817	0.0680032	0.10972	0.107999	0.026838	0.0256891	0.0347758	0.0468422	0.0366907	0.0770683	0.0535088	0.0394362	0.694304	0.737004	-0.526362	-0.440255	0.363921	0.891909	Not Detected	Detected	Detected	Detected	Not Detected	Not Detected	Not Detected	Not Detected	Not Detected	1	2	3	FALSE	A_30_P01018822	chr13:23517278-23523756_F										lincRNA:chr13:23517278-23523756 forward strand	chr13:23517358-23517417	mm|13qA3.1
379	A_30_P01018827	0.539451	0.493052	0.586304	0.767668	0.639129	0.710064	0.916902	0.940234	0.701054	0.539602	0.70562	0.85273	1.30767	1.20848	0.386996	0.273197	0.0214635	0.182725	Detected	Detected	Detected	Detected	Detected	Detected	Detected	Detected	Detected	0	0	0	FALSE	A_30_P01018827	chr12:70637975-70638314_R										lincRNA:chr12:70637975-70638314 reverse strand	chr12:70638081-70638022	mm|12qC2
380	A_30_P01018833	0.258293	0.218028	0.23861	0.0485217	0.0262296	0.0387271	0.0517938	0.0822471	0.102737	0.23831	0.0378261	0.078926	0.158726	2.08655	-2.65539	1.06112	0.00605051	0.0551647	Detected	Detected	Detected	Not Detected	Not Detected	Not Detected	Not Detected	Not Detected	Detected	0	3	2	FALSE	A_30_P01018833	chr13:28551902-28975446_R										lincRNA:chr13:28551902-28975446 reverse strand	chr13:28551962-28551903	mm|13qA3.1
381	A_30_P01018834	0.011814	0.00993953	0.0100328	0.0217785	0.0289185	0.0269527	0.0213313	0.0249067	0.0187218	0.0105954	0.0258833	0.0216532	2.44287	0.836574	1.28858	-0.257436	0.0017952	0.207624	Not Detected	Not Detected	Not Detected	Not Detected	Not Detected	Not Detected	Not Detected	Not Detected	Not Detected	3	3	3	FALSE	A_30_P01018834	chr15:74507625-74519200_R										lincRNA:chr15:74507625-74519200 reverse strand	chr15:74513823-74513764	mm|15qD3
382	A_30_P01018842	0.0104916	0.00905228	0.0091141	0.019586	0.0257643	0.024628	0.0194799	0.0223366	0.016304	0.00955265	0.0233261	0.0193735	2.44185	0.830549	1.28797	-0.267862	0.00225754	0.208194	Not Detected	Not Detected	Not Detected	Not Detected	Not Detected	Not Detected	Not Detected	Not Detected	Not Detected	3	3	3	FALSE	A_30_P01018842	chr7:66570691-66573827_R										lincRNA:chr7:66570691-66573827 reverse strand	chr7:66570893-66570834	mm|7qC
383	A_30_P01018844	0.557926	0.621355	0.685554	0.353521	0.265425	0.273215	0.300981	0.352878	0.364649	0.621612	0.297387	0.339502	0.478412	1.14162	-1.06367	0.191082	0.00409025	0.284725	Detected	Detected	Detected	Detected	Detected	Detected	Detected	Detected	Detected	0	0	0	FALSE	A_30_P01018844	chr14:78214602-78225827_R										lincRNA:chr14:78214602-78225827 reverse strand	chr14:78220707-78220648	mm|14qD3
384	A_30_P01018846	0.0127357	0.00965358	0.0206198	0.0210263	0.027549	0.0259758	0.0206607	0.0236905	0.017833	0.0143364	0.0248504	0.0207281	1.73338	0.834115	0.793587	-0.261682	0.102195	0.192679	Not Detected	Not Detected	Not Detected	Not Detected	Not Detected	Not Detected	Not Detected	Not Detected	Not Detected	3	3	3	FALSE	A_30_P01018846	chr9:114416254-114416844_R										lincRNA:chr9:114416254-114416844 reverse strand	chr9:114416653-114416594	mm|9qF3
385	A_30_P01018860	0.0464603	0.0411926	0.0446051	0.0229436	0.0304255	0.0373914	0.024531	0.040315	0.025487	0.044086	0.0302535	0.030111	0.686239	0.995289	-0.543217	-0.0068124	0.100297	0.959124	Not Detected	Not Detected	Not Detected	Not Detected	Not Detected	Not Detected	Not Detected	Not Detected	Not Detected	3	3	3	FALSE	A_30_P01018860	chr8:59994074-60002058_R										lincRNA:chr8:59994074-60002058 reverse strand
386	A_30_P01018861	2.59304	2.64172	2.83856	4.66494	7.12425	6.66621	6.21846	7.70507	6.56328	2.69111	6.1518	6.82894	2.28597	1.11007	1.19281	0.150652	0.0214879	0.485119	Detected	Detected	Detected	Detected	Detected	Detected	Detected	Detected	Detected	0	0	0	FALSE	A_30_P01018861	chr2:152172745-152184745_R										lincRNA:chr2:152172745-152184745 reverse strand	chr2:152179352-152179293	mm|2qG3
387	A_30_P01018863	0.0891193	0.0774651	0.0670435	0.122123	0.136445	0.06687	0.102061	0.127234	0.123895	0.077876	0.108479	0.11773	1.39297	1.08528	0.478167	0.118065	0.317454	0.642908	Detected	Detected	Detected	Detected	Detected	Not Detected	Detected	Detected	Detected	0	1	0	FALSE	A_30_P01018863	chr18:75518299-75524782_R										lincRNA:chr18:75518299-75524782 reverse strand	chr18:75520036-75519977	mm|18qE3
388	A_30_P01018865	0.0463171	0.0387	0.0383384	0.0898722	0.0287348	0.0418654	0.0243342	0.0245473	0.0464832	0.0411185	0.0534908	0.0317882	1.30089	0.594275	0.379502	-0.750798	0.698706	0.328791	Not Detected	Not Detected	Not Detected	Not Detected	Not Detected	Not Detected	Not Detected	Not Detected	Not Detected	3	3	3	FALSE	A_30_P01018865	chr5:53931541-53945241_R										lincRNA:chr5:53931541-53945241 reverse strand	chr5:53938263-53938204	mm|5qC1
389	A_30_P01018869	0.0343191	0.0384993	0.0341948	0.0638944	0.0387187	0.0219248	0.0173888	0.0261618	0.0508457	0.0356711	0.0415126	0.0314654	1.16376	0.757973	0.218794	-0.399782	0.862491	0.553321	Not Detected	Not Detected	Not Detected	Not Detected	Not Detected	Not Detected	Not Detected	Not Detected	Not Detected	3	3	3	FALSE	A_30_P01018869	chr5:52461266-52541416_F										lincRNA:chr5:52461266-52541416 forward strand	chr5:52506631-52506690	mm|5qC1
390	A_30_P01018875	0.321407	0.287181	0.327299	0.319996	0.237972	0.203853	0.240169	0.257067	0.22362	0.311962	0.25394	0.240285	0.81401	0.946227	-0.296881	-0.0797412	0.230195	0.800309	Detected	Detected	Detected	Detected	Detected	Detected	Detected	Detected	Detected	0	0	0	FALSE	A_30_P01018875	chr2:158169020-158191295_R										lincRNA:chr2:158169020-158191295 reverse strand	chr2:158181784-158181725	mm|2qH1
391	A_30_P01018877	0.00937855	0.00801136	0.00808072	0.0171796	0.0229548	0.0217594	0.0172811	0.0199583	0.0147194	0.00849021	0.0206313	0.0173196	2.43001	0.839482	1.28096	-0.252428	0.00260342	0.234647	Not Detected	Not Detected	Not Detected	Not Detected	Not Detected	Not Detected	Not Detected	Not Detected	Not Detected	3	3	3	FALSE	A_30_P01018877	chr2:94063213-94063624_F										lincRNA:chr2:94063213-94063624 forward strand	chr2:94063563-94063622	mm|2qE1
392	A_30_P01018878	0.050932	0.0286728	0.0451444	0.0278886	0.0251139	0.0235415	0.0187277	0.0215221	0.0160918	0.0415831	0.0255147	0.0187805	0.613583	0.736068	-0.70467	-0.442089	0.109178	0.0446458	Not Detected	Not Detected	Detected	Not Detected	Not Detected	Not Detected	Not Detected	Not Detected	Not Detected	2	3	3	FALSE	A_30_P01018878	chr8:71938275-72113375_F										lincRNA:chr8:71938275-72113375 forward strand	chr8:72105151-72105210	mm|8qB3.3
393	A_30_P01018886	0.0911079	0.178569	0.0943178	0.150886	0.112808	0.122895	0.124837	0.156471	0.0812063	0.121332	0.128863	0.120838	1.06207	0.937723	0.0868849	-0.092767	0.69432	0.693597	Detected	Detected	Detected	Detected	Not Detected	Detected	Detected	Detected	Detected	0	1	0	FALSE	A_30_P01018886	chr7:134779841-134840591_F										lincRNA:chr7:134779841-134840591 forward strand	chr7:134826758-134826817	mm|7qF3
394	A_30_P01018891	0.781992	0.788924	0.600745	1.0557	1.07628	0.983587	1.01247	1.17361	0.919496	0.723887	1.03852	1.03519	1.43465	0.996795	0.520695	-0.00463078	0.0443173	0.928237	Detected	Detected	Detected	Detected	Detected	Detected	Detected	Detected	Detected	0	0	0	FALSE	A_30_P01018891	chr10:94900849-94928059_R										lincRNA:chr10:94900849-94928059 reverse strand	chr10:94906135-94906076	mm|10qC2
395	A_30_P01018894	0.0130358	0.0141847	0.0110783	0.0236685	0.0460622	0.0296442	0.0230943	0.027091	0.0204212	0.0127663	0.033125	0.0235355	2.59473	0.710507	1.37558	-0.493079	0.0303533	0.250846	Not Detected	Not Detected	Not Detected	Not Detected	Not Detected	Not Detected	Not Detected	Not Detected	Not Detected	3	3	3	FALSE	A_30_P01018894	chr5:110891642-110918642_R										lincRNA:chr5:110891642-110918642 reverse strand	chr5:110909673-110909614	mm|5qF
396	A_30_P01018899	0.0377261	0.0399335	0.032197	0.0204761	0.0270957	0.0252921	0.0201108	0.0234397	0.017487	0.0366189	0.024288	0.0203458	0.663264	0.837692	-0.592345	-0.255508	0.0199346	0.211725	Not Detected	Not Detected	Not Detected	Not Detected	Not Detected	Not Detected	Not Detected	Not Detected	Not Detected	3	3	3	FALSE	A_30_P01018899	chr2:72825297-72826470_F										lincRNA:chr2:72825297-72826470 forward strand	chr2:72825311-72825370	mm|2qC3
397	A_30_P01018909	0.0102609	0.00879971	0.0088215	0.0186674	0.0246924	0.0234255	0.0184844	0.0214955	0.0557082	0.00929403	0.0222618	0.031896	2.39528	1.43277	1.26019	0.518808	0.00232396	0.563886	Not Detected	Not Detected	Not Detected	Not Detected	Not Detected	Not Detected	Not Detected	Not Detected	Not Detected	3	3	3	FALSE	A_30_P01018909	chr10:98761521-98885681_F										lincRNA:chr10:98761521-98885681 forward strand	chr10:98885063-98885122	mm|10qD1
398	A_30_P01018912	0.0925675	0.0616896	0.0571964	0.0651512	0.0950078	0.83351	0.169718	0.124132	0.208575	0.0704845	0.331223	0.167475	4.69923	0.505627	2.23242	-0.983855	0.366309	0.952889	Detected	Detected	Detected	Not Detected	Not Detected	Detected	Detected	Not Detected	Detected	0	2	1	FALSE	A_30_P01018912	chr15:74436455-74466741_R										lincRNA:chr15:74436455-74466741 reverse strand	chr15:74438600-74438541	mm|15qD3
399	A_30_P01018914	1.66494	1.17306	1.47843	1.46419	1.65552	1.62611	1.95348	1.95799	1.72755	1.43881	1.58194	1.87967	1.09948	1.18821	0.136815	0.248789	0.425259	0.0381355	Detected	Detected	Detected	Detected	Detected	Detected	Detected	Detected	Detected	0	0	0	FALSE	A_30_P01018914	chr9:78107225-78118850_F										lincRNA:chr9:78107225-78118850 forward strand	chr9:78116834-78116893	mm|9qE1
400	A_30_P01018920	0.0401272	0.0457555	0.0831516	0.164423	0.0893251	0.0232308	0.0574562	0.0370041	0.0275197	0.0563448	0.0923262	0.04066	1.63859	0.440395	0.712459	-1.18313	0.698959	0.422084	Not Detected	Detected	Detected	Detected	Not Detected	Not Detected	Not Detected	Not Detected	Not Detected	1	2	3	FALSE	A_30_P01018920	chr18:36472370-36472659_F										lincRNA:chr18:36472370-36472659 forward strand	chr18:36472600-36472659	mm|18qB2
401	A_30_P01018927	0.0297006	0.0209791	0.0095479	0.0205483	0.0371288	0.0254559	0.0202321	0.0232097	0.0172814	0.0200759	0.027711	0.0202411	1.38031	0.730434	0.464996	-0.453174	0.37326	0.230985	Not Detected	Not Detected	Not Detected	Not Detected	Not Detected	Not Detected	Not Detected	Not Detected	Not Detected	3	3	3	FALSE	A_30_P01018927	chr15:90156889-90184564_F										lincRNA:chr15:90156889-90184564 forward strand	chr15:90184179-90184238	mm|15qE3
402	A_30_P01018931	0.916806	0.910402	0.851633	0.878562	0.245366	0.325557	0.254654	0.304022	0.307395	0.892947	0.483162	0.28869	0.541087	0.597502	-0.886069	-0.742984	0.183683	0.450436	Detected	Detected	Detected	Detected	Detected	Detected	Detected	Detected	Detected	0	0	0	FALSE	A_30_P01018931	chr2:176610409-176612864_F										lincRNA:chr2:176610409-176612864 forward strand	chr2:176612790-176612849	mm|2qH4
403	A_30_P01018933	0.0432027	0.0481536	0.040165	0.115363	0.0280473	0.0266942	0.0455881	0.0375111	0.0688121	0.0438404	0.0567016	0.0506371	1.29336	0.893045	0.371128	-0.163195	0.983782	0.855456	Not Detected	Not Detected	Not Detected	Detected	Not Detected	Not Detected	Not Detected	Not Detected	Not Detected	3	2	3	FALSE	A_30_P01018933	chr13:54399275-54445825_R										lincRNA:chr13:54399275-54445825 reverse strand	chr13:54431608-54431549	mm|13qB1
404	A_30_P01018938	0.154542	0.133168	0.164211	0.152795	0.0290673	0.0319215	0.0215151	0.0249157	0.0630857	0.15064	0.0712612	0.0365055	0.473056	0.512278	-1.07992	-0.965002	0.187013	0.501051	Detected	Detected	Detected	Detected	Not Detected	Not Detected	Not Detected	Not Detected	Not Detected	0	2	3	FALSE	A_30_P01018938	chr6:93029101-93031007_F										lincRNA:chr6:93029101-93031007 forward strand	chr6:93030434-93030493	mm|6qD1
405	A_30_P01018940	0.128913	0.112367	0.1304	0.14063	0.348209	0.130229	0.2166	0.141178	0.160729	0.123893	0.206356	0.172835	1.66559	0.83756	0.736037	-0.255736	0.327133	0.81727	Detected	Detected	Detected	Detected	Detected	Not Detected	Detected	Detected	Detected	0	1	0	FALSE	A_30_P01018940	chr7:150205925-150233950_F										lincRNA:chr7:150205925-150233950 forward strand	chr7:150219780-150219839	mm|7qF5
406	A_30_P01018943	0.0106581	0.00905056	0.00907724	0.0192928	0.025434	0.0238641	0.0189554	0.0218198	0.0163812	0.00959531	0.0228636	0.0190521	2.38279	0.833294	1.25265	-0.263102	0.00189228	0.195881	Not Detected	Not Detected	Not Detected	Not Detected	Not Detected	Not Detected	Not Detected	Not Detected	Not Detected	3	3	3	FALSE	A_30_P01018943	chr9:34192364-34192810_R										lincRNA:chr9:34192364-34192810 reverse strand	chr9:34192494-34192435	mm|9qA4
407	A_30_P01018948	0.12735	0.120674	0.136744	0.285853	0.25689	0.184238	1.1552	0.183507	0.203266	0.128256	0.242327	0.51399	1.88939	2.12106	0.917923	1.08479	0.0348795	0.587136	Detected	Detected	Detected	Detected	Detected	Detected	Detected	Detected	Detected	0	0	0	FALSE	A_30_P01018948	chr7:26054813-26063725_R										lincRNA:chr7:26054813-26063725 reverse strand	chr7:26056117-26056058	mm|7qA3
408	A_30_P01018952	0.0117314	0.00999175	0.0100695	0.0217814	0.0288331	0.0273069	0.0215072	0.0246294	0.0183496	0.0105976	0.0259738	0.0214954	2.45092	0.827581	1.29333	-0.273027	0.00204948	0.192443	Not Detected	Not Detected	Not Detected	Not Detected	Not Detected	Not Detected	Not Detected	Not Detected	Not Detected	3	3	3	FALSE	A_30_P01018952	chr10:27466235-27529430_R										lincRNA:chr10:27466235-27529430 reverse strand	chr10:27466449-27466390	mm|10qA4
409	A_30_P01018953	0.227248	0.293088	0.269521	0.299006	0.397489	0.438818	0.285561	0.441147	0.369879	0.263285	0.378438	0.365529	1.43737	0.965888	0.52343	-0.0500716	0.07056	0.836764	Detected	Detected	Detected	Detected	Detected	Detected	Detected	Detected	Detected	0	0	0	FALSE	A_30_P01018953	chr16:23543837-23560153_F										lincRNA:chr16:23543837-23560153 forward strand	chr16:23560038-23560097	mm|16qB1
410	A_30_P01018957	0.707085	0.627484	0.599127	0.677538	0.814257	0.752246	0.78932	0.76804	0.742694	0.644566	0.748014	0.766685	1.16049	1.02496	0.214738	0.0355679	0.11065	0.668229	Detected	Detected	Detected	Detected	Detected	Detected	Detected	Detected	Detected	0	0	0	FALSE	A_30_P01018957	chr10:81680941-81704964_R										lincRNA:chr10:81680941-81704964 reverse strand	chr10:81685965-81685906	mm|10qC1
411	A_30_P01018958	0.266668	0.230122	0.256909	0.393236	0.377395	0.355556	0.387571	0.369529	0.295407	0.251233	0.375396	0.350836	1.49421	0.934575	0.579385	-0.097617	0.00280999	0.478582	Detected	Detected	Detected	Detected	Detected	Detected	Detected	Detected	Detected	0	0	0	FALSE	A_30_P01018958	chr6:50339188-50409363_F										lincRNA:chr6:50339188-50409363 forward strand	chr6:50400013-50400072	mm|6qB2.3
412	A_30_P01018959	0.326114	0.280008	0.29864	0.922138	1.02325	0.890478	0.815679	1.48307	0.802698	0.301587	0.945288	1.03382	3.13437	1.09365	1.64818	0.129155	4.8273e-05	0.835365	Detected	Detected	Detected	Detected	Detected	Detected	Detected	Detected	Detected	0	0	0	FALSE	A_30_P01018959	chr5:125861675-125880125_R										lincRNA:chr5:125861675-125880125 reverse strand	chr5:125866355-125866296	mm|5qG1.1
413	A_30_P01018963	0.0175119	0.0450363	0.0385549	0.0979196	0.0627159	0.037316	0.0547287	0.0455924	0.0371094	0.033701	0.0659838	0.0458102	1.95792	0.694264	0.969319	-0.526444	0.171119	0.398104	Not Detected	Not Detected	Not Detected	Not Detected	Not Detected	Not Detected	Not Detected	Not Detected	Not Detected	3	3	3	FALSE	A_30_P01018963	chr13:98221098-98480773_R										lincRNA:chr13:98221098-98480773 reverse strand	chr13:98222347-98222288	mm|13qD1
414	A_30_P01018964	0.365488	0.409623	0.435413	0.28458	0.284346	0.293243	0.309169	0.316342	0.316435	0.403508	0.28739	0.313982	0.712228	1.09253	-0.489588	0.127673	0.019219	0.00289209	Detected	Detected	Detected	Detected	Detected	Detected	Detected	Detected	Detected	0	0	0	FALSE	A_30_P01018964	chr2:153163620-153170845_R										lincRNA:chr2:153163620-153170845 reverse strand	chr2:153167575-153167516	mm|2qH1
415	A_30_P01018966	0.142692	0.133387	0.129172	0.302695	0.165466	0.175385	0.106375	0.197741	0.188853	0.135084	0.214515	0.164323	1.58802	0.766021	0.667227	-0.384545	0.155228	0.393872	Detected	Detected	Detected	Detected	Detected	Detected	Detected	Detected	Detected	0	0	0	FALSE	A_30_P01018966	chr13:70745306-70837331_R										lincRNA:chr13:70745306-70837331 reverse strand	chr13:70745473-70745414	mm|13qC1
416	A_30_P01018968	0.0414225	0.0510038	0.0689022	0.0825617	0.105929	0.073535	0.0766414	0.041783	0.0599548	0.0537762	0.0873419	0.0594597	1.62418	0.680769	0.699708	-0.554762	0.0590102	0.137375	Not Detected	Detected	Detected	Not Detected	Not Detected	Not Detected	Not Detected	Not Detected	Not Detected	1	3	3	FALSE	A_30_P01018968	chr7:106529142-106529752_R										lincRNA:chr7:106529142-106529752 reverse strand	chr7:106529532-106529473	mm|7qE2
417	A_30_P01018969	0.0102198	0.0157607	0.0338533	0.0242549	0.031939	0.0232969	0.0185448	0.0212739	0.0157418	0.0199446	0.0264969	0.0185202	1.32853	0.698956	0.409827	-0.516726	0.373625	0.0553297	Not Detected	Not Detected	Not Detected	Not Detected	Not Detected	Not Detected	Not Detected	Not Detected	Not Detected	3	3	3	FALSE	A_30_P01018969	chr4:53315503-53316050_F										lincRNA:chr4:53315503-53316050 forward strand	chr4:53315791-53315850	mm|4qB2
418	A_30_P01018972	0.029902	0.0402594	0.113076	0.0722839	0.02713	0.0414254	0.0476489	0.0233243	0.0169692	0.0610793	0.0469464	0.0293142	0.768614	0.624418	-0.379669	-0.679416	0.746525	0.308013	Not Detected	Not Detected	Detected	Not Detected	Not Detected	Not Detected	Not Detected	Not Detected	Not Detected	2	3	3	FALSE	A_30_P01018972	chr3:35236023-35241498_R										lincRNA:chr3:35236023-35241498 reverse strand	chr3:35236775-35236716	mm|3qA3
419	A_30_P01018976	1.84061	1.67366	1.43431	2.66911	2.27183	2.16546	2.247	2.5634	2.1054	1.64953	2.3688	2.30527	1.43605	0.97318	0.522103	-0.0392221	0.0203133	0.772746	Detected	Detected	Detected	Detected	Detected	Detected	Detected	Detected	Detected	0	0	0	FALSE	A_30_P01018976	chr15:92197603-92208534_F										lincRNA:chr15:92197603-92208534 forward strand	chr15:92208387-92208446	mm|15qE3
420	A_30_P01018981	0.849746	0.861911	0.771502	0.698162	0.944937	0.734138	0.982532	0.96983	1.01766	0.82772	0.792412	0.990008	0.957344	1.24936	-0.0628908	0.321188	0.64831	0.12896	Detected	Detected	Detected	Detected	Detected	Detected	Detected	Detected	Detected	0	0	0	FALSE	A_30_P01018981	chr7:13533925-13544525_F										lincRNA:chr7:13533925-13544525 forward strand	chr7:13541092-13541151	mm|7qA1
421	A_30_P01018982	0.0281138	0.015045	0.0313434	0.0297243	0.0302633	0.0282083	0.0225511	0.0259422	0.0399698	0.0248341	0.0293986	0.0294877	1.1838	1.00303	0.243428	0.0043648	0.444096	0.889286	Not Detected	Not Detected	Not Detected	Not Detected	Not Detected	Not Detected	Not Detected	Not Detected	Not Detected	3	3	3	FALSE	A_30_P01018982	chr4:8865575-8899400_F										lincRNA:chr4:8865575-8899400 forward strand	chr4:8874435-8874494	mm|4qA1
422	A_30_P01018983	0.0118784	0.0101555	0.0102462	0.0222466	0.0297584	0.0281764	0.0225708	0.0252609	0.0190576	0.01076	0.0267271	0.0222964	2.48393	0.834226	1.31262	-0.26149	0.00247048	0.211748	Not Detected	Not Detected	Not Detected	Not Detected	Not Detected	Not Detected	Not Detected	Not Detected	Not Detected	3	3	3	FALSE	A_30_P01018983	chr8:72178035-72200445_R										lincRNA:chr8:72178035-72200445 reverse strand	chr8:72190217-72190158	mm|8qB3.3
423	A_30_P01018984	0.0105773	0.00896151	0.009081	0.0194798	0.0259093	0.0242894	0.0192252	0.0225508	0.0168781	0.00953995	0.0232261	0.0195514	2.43462	0.841782	1.2837	-0.248482	0.00209632	0.226123	Not Detected	Not Detected	Not Detected	Not Detected	Not Detected	Not Detected	Not Detected	Not Detected	Not Detected	3	3	3	FALSE	A_30_P01018984	chr13:66888650-66902600_F										lincRNA:chr13:66888650-66902600 forward strand	chr13:66892595-66892654	mm|13qB3
424	A_30_P01018990	0.245801	0.233446	0.253686	0.400126	0.257242	0.368216	0.445243	0.376856	0.292675	0.244311	0.341862	0.371591	1.39929	1.08696	0.484693	0.120305	0.138875	0.660717	Detected	Detected	Detected	Detected	Detected	Detected	Detected	Detected	Detected	0	0	0	FALSE	A_30_P01018990	chr5:123582742-123588202_F										lincRNA:chr5:123582742-123588202 forward strand	chr5:123586499-123586558	mm|5qF
425	A_30_P01018993	0.0112163	0.00946658	0.00960483	0.0205715	0.0274632	0.0256344	0.0264991	0.0233501	0.0171255	0.0100959	0.0245564	0.0223249	2.43231	0.909128	1.28233	-0.137445	0.00212823	0.546392	Not Detected	Not Detected	Not Detected	Not Detected	Not Detected	Not Detected	Not Detected	Not Detected	Not Detected	3	3	3	FALSE	A_30_P01018993	chr10:92550314-92577555_F										lincRNA:chr10:92550314-92577555 forward strand	chr10:92566271-92566330	mm|10qC2
426	A_30_P01018995	0.0888948	0.0985042	0.114672	0.0650069	0.110822	0.0961194	0.144956	0.100343	0.139294	0.10069	0.0906493	0.128197	0.900279	1.41421	-0.151555	0.5	0.534708	0.150816	Detected	Detected	Detected	Not Detected	Not Detected	Not Detected	Detected	Not Detected	Detected	0	3	1	FALSE	A_30_P01018995	chr18:77968421-77972209_R										lincRNA:chr18:77968421-77972209 reverse strand	chr18:77968971-77968912	mm|18qE3
427	A_30_P01018998	0.010312	0.00872789	0.00882335	0.0188268	0.0251488	0.0235794	0.018769	0.0215181	0.0194302	0.00928773	0.0225184	0.0199058	2.42453	0.88398	1.2777	-0.177915	0.00225544	0.316485	Not Detected	Not Detected	Not Detected	Not Detected	Not Detected	Not Detected	Not Detected	Not Detected	Not Detected	3	3	3	FALSE	A_30_P01018998	chr4:133368314-133380210_F										lincRNA:chr4:133368314-133380210 forward strand	chr4:133376749-133376808	mm|4qD3
428	A_30_P01019001	0.0313352	0.0318917	0.027156	0.0642399	0.0308834	0.0286186	0.0223535	0.026433	0.0199426	0.0301276	0.0412473	0.0229097	1.36909	0.555423	0.453213	-0.848341	0.441665	0.170577	Not Detected	Not Detected	Not Detected	Not Detected	Not Detected	Not Detected	Not Detected	Not Detected	Not Detected	3	3	3	FALSE	A_30_P01019001	chr8:106619342-106624851_F										lincRNA:chr8:106619342-106624851 forward strand	chr8:106622296-106622355	mm|8qD3
429	A_30_P01019006	0.0588273	0.0429658	0.0906478	0.247902	0.0982999	0.0551923	0.173754	0.111287	0.132927	0.064147	0.133798	0.139323	2.0858	1.04129	1.0606	0.0583729	0.3154	0.676504	Detected	Not Detected	Detected	Detected	Not Detected	Not Detected	Detected	Not Detected	Detected	1	2	1	FALSE	A_30_P01019006	chr7:134369091-134376366_R										lincRNA:chr7:134369091-134376366 reverse strand	chr7:134375961-134375902	mm|7qF3
430	A_30_P01019010	1.56335	1.50965	1.6157	3.3564	2.87806	3.1261	2.67589	2.66145	2.68911	1.5629	3.12019	2.67548	1.99641	0.857474	0.997409	-0.221834	0.00118013	0.075365	Detected	Detected	Detected	Detected	Detected	Detected	Detected	Detected	Detected	0	0	0	FALSE	A_30_P01019010	chr11:96111499-96126224_R										lincRNA:chr11:96111499-96126224 reverse strand	chr11:96115040-96114981	mm|11qD
431	A_30_P01019011	11.5818	10.4342	10.4154	20.8732	19.6563	17.0797	15.6239	17.0777	15.3417	10.8105	19.2031	16.0144	1.77634	0.833951	0.828911	-0.261965	0.00273142	0.0746163	Detected	Detected	Detected	Detected	Detected	Detected	Detected	Detected	Detected	0	0	0	FALSE	A_30_P01019011	chr15:51829797-51844247_R										lincRNA:chr15:51829797-51844247 reverse strand	chr15:51829935-51829876	mm|15qC
432	A_30_P01019013	0.184708	0.144184	0.146945	0.301625	0.199307	0.334973	0.245161	0.199942	0.26472	0.158612	0.278635	0.236607	1.7567	0.849166	0.812871	-0.235881	0.0554513	0.473053	Detected	Detected	Detected	Detected	Detected	Detected	Detected	Detected	Detected	0	0	0	FALSE	A_30_P01019013	chr14:22267795-22319045_R										lincRNA:chr14:22267795-22319045 reverse strand
433	A_30_P01019014	2.03697	1.71794	1.69158	1.1046	0.295922	0.402114	0.310093	0.326432	0.376266	1.81549	0.600879	0.337597	0.330973	0.561838	-1.59522	-0.831774	0.0827237	0.408691	Detected	Detected	Detected	Detected	Detected	Detected	Detected	Detected	Detected	0	0	0	FALSE	A_30_P01019014	chr14:62280837-62283960_R										lincRNA:chr14:62280837-62283960 reverse strand	chr14:62281001-62280942	mm|14qD1
434	A_30_P01019015	0.914082	0.981289	1.00617	0.901067	1.15005	1.01169	1.16255	1.13832	1.11725	0.967181	1.02094	1.13937	1.05558	1.116	0.0780372	0.158342	0.564151	0.24348	Detected	Detected	Detected	Detected	Detected	Detected	Detected	Detected	Detected	0	0	0	FALSE	A_30_P01019015	chr13:49488457-49493732_R										lincRNA:chr13:49488457-49493732 reverse strand	chr13:49490177-49490118	mm|13qA5
435	A_30_P01019017	0.022109	0.0450188	0.0350755	0.0507417	0.048774	0.0290696	0.0185818	0.690331	0.0161374	0.0340677	0.0428618	0.241683	1.25813	5.63867	0.331285	2.49535	0.431179	0.802413	Not Detected	Detected	Not Detected	Not Detected	Not Detected	Not Detected	Not Detected	Detected	Not Detected	2	3	2	FALSE	A_30_P01019017	chr18:63355660-63369610_F										lincRNA:chr18:63355660-63369610 forward strand	chr18:63365245-63365304	mm|18qE1
436	A_30_P01019026	0.273525	0.204169	0.224514	0.176609	0.134765	0.163179	0.107735	0.176184	0.149436	0.23407	0.158184	0.144452	0.675801	0.913186	-0.56533	-0.13102	0.0296504	0.569701	Detected	Detected	Detected	Detected	Not Detected	Detected	Not Detected	Detected	Detected	0	1	1	FALSE	A_30_P01019026	chr17:26911397-26917047_R										lincRNA:chr17:26911397-26917047 reverse strand	chr17:26913216-26913157	mm|17qA3.3
437	A_30_P01019027	0.0103491	0.00881609	0.00892625	0.0190881	0.0255034	0.0240296	0.0190746	0.0218671	0.0158839	0.00936382	0.0228737	0.0189419	2.44277	0.828107	1.28852	-0.27211	0.00243604	0.212972	Not Detected	Not Detected	Not Detected	Not Detected	Not Detected	Not Detected	Not Detected	Not Detected	Not Detected	3	3	3	FALSE	A_30_P01019027	chr1:44922628-44923224_F										lincRNA:chr1:44922628-44923224 forward strand	chr1:44923165-44923224	mm|1qC1.1
438	A_30_P01019028	0.0448699	0.0680843	0.0611783	0.0703653	0.0856548	0.0679077	0.10349	0.0818644	0.107455	0.0580442	0.0746426	0.0976031	1.28596	1.30761	0.362848	0.386928	0.162268	0.0770581	Not Detected	Detected	Detected	Not Detected	Not Detected	Not Detected	Detected	Not Detected	Detected	1	3	1	FALSE	A_30_P01019028	chr4:135138014-135174889_R										lincRNA:chr4:135138014-135174889 reverse strand	chr4:135164039-135163980	mm|4qD3
439	A_30_P01019030	0.48613	0.426199	0.434984	0.50244	0.421589	0.477437	0.45483	0.397068	0.631381	0.449104	0.467155	0.494426	1.04019	1.05838	0.0568513	0.0818535	0.594631	0.806206	Detected	Detected	Detected	Detected	Detected	Detected	Detected	Detected	Detected	0	0	0	FALSE	A_30_P01019030	chr16:59557120-59602070_R										lincRNA:chr16:59557120-59602070 reverse strand	chr16:59597976-59597917	mm|16qC1.3
440	A_30_P01019034	0.0126778	0.0223998	0.0405766	0.231902	0.0303946	0.0285278	0.0227312	0.0256821	0.0508643	0.025218	0.0969413	0.0330925	3.84413	0.341367	1.94266	-1.55061	0.304304	0.458905	Not Detected	Not Detected	Not Detected	Detected	Not Detected	Not Detected	Not Detected	Not Detected	Not Detected	3	2	3	FALSE	A_30_P01019034	chrX:6942702-6954713_F										lincRNA:chrX:6942702-6954713 forward strand	chrX:6951000-6951059	mm|XqA1.1
441	A_30_P01019036	0.0294058	0.0523743	0.0397724	0.0192558	0.0257468	0.0345732	0.0257078	0.0538586	0.0335442	0.0405175	0.0265253	0.0377035	0.654662	1.42142	-0.611178	0.507331	0.148191	0.296251	Not Detected	Detected	Not Detected	Not Detected	Not Detected	Not Detected	Not Detected	Not Detected	Not Detected	2	3	3	FALSE	A_30_P01019036	chr4:128207615-128242898_F										lincRNA:chr4:128207615-128242898 forward strand	chr4:128242502-128242561	mm|4qD2.2
442	A_30_P01019037	6.85521	6.00844	6.98015	13.9141	13.712	12.3876	12.8444	16.9883	17.5276	6.6146	13.3379	15.7868	2.01643	1.1836	1.0118	0.243185	0.000420132	0.241061	Detected	Detected	Detected	Detected	Detected	Detected	Detected	Detected	Detected	0	0	0	FALSE	A_30_P01019037	chr19:5834117-5835940_R										lincRNA:chr19:5834117-5835940 reverse strand	chr19:5834602-5834543	mm|19qA
443	A_30_P01019038	0.0599515	0.0384568	0.0522588	0.066194	0.0431826	0.0297689	0.0492082	0.0268576	0.0200388	0.0502224	0.0463818	0.0320349	0.923529	0.690677	-0.11477	-0.533918	0.690481	0.330999	Not Detected	Not Detected	Not Detected	Not Detected	Not Detected	Not Detected	Not Detected	Not Detected	Not Detected	3	3	3	FALSE	A_30_P01019038	chr3:95443575-95462543_R										lincRNA:chr3:95443575-95462543 reverse strand	chr3:95457804-95457745	mm|3qF2.1
444	A_30_P01019039	0.0107202	0.00915383	0.00927819	0.0200062	0.0262355	0.0247177	0.0196859	0.0227126	0.0167381	0.00971739	0.0236531	0.0197122	2.4341	0.833386	1.28339	-0.262943	0.00179725	0.203255	Not Detected	Not Detected	Not Detected	Not Detected	Not Detected	Not Detected	Not Detected	Not Detected	Not Detected	3	3	3	FALSE	A_30_P01019039	chr13:94198298-94198965_R										lincRNA:chr13:94198298-94198965 reverse strand	chr13:94198609-94198550	mm|13qC3
445	A_30_P01019040	0.0113769	0.00963803	0.00964881	0.0206171	0.0270381	0.025196	0.0431958	0.0230748	0.0173591	0.0102213	0.0242837	0.0278766	2.37581	1.14795	1.24842	0.199064	0.00162484	0.824656	Not Detected	Not Detected	Not Detected	Not Detected	Not Detected	Not Detected	Not Detected	Not Detected	Not Detected	3	3	3	FALSE	A_30_P01019040	chr6:140556677-140557216_F										lincRNA:chr6:140556677-140557216 forward strand	chr6:140557036-140557095	mm|6qG2
446	A_30_P01019049	1.35273	1.07633	1.22575	4.68121	4.64743	4.37436	4.05804	4.52134	3.0321	1.21827	4.56766	3.8705	3.7493	0.847369	1.90662	-0.238938	0.00108025	0.270677	Detected	Detected	Detected	Detected	Detected	Detected	Detected	Detected	Detected	0	0	0	FALSE	A_30_P01019049	chr10:66559716-66647841_R										lincRNA:chr10:66559716-66647841 reverse strand	chr10:66620724-66620665	mm|10qB5.1
447	A_30_P01019059	0.0101112	0.00864346	0.00867138	0.025998	0.0242877	0.0229908	0.0181955	0.0210573	0.0255052	0.00914201	0.0244255	0.021586	2.67179	0.883747	1.41781	-0.178295	0.000211711	0.309314	Not Detected	Not Detected	Not Detected	Not Detected	Not Detected	Not Detected	Not Detected	Not Detected	Not Detected	3	3	3	FALSE	A_30_P01019059	chr16:77682803-77708453_R										lincRNA:chr16:77682803-77708453 reverse strand	chr16:77690992-77690933	mm|16qC3.1
448	A_30_P01019061	0.0126637	0.0108369	0.010966	0.0236593	0.0316099	0.0298838	0.0301189	0.0269137	0.0198275	0.0114889	0.0283843	0.02562	2.47059	0.902612	1.30486	-0.147822	0.00250209	0.516846	Not Detected	Not Detected	Not Detected	Not Detected	Not Detected	Not Detected	Not Detected	Not Detected	Not Detected	3	3	3	FALSE	A_30_P01019061	chr14:65720392-65769859_R										lincRNA:chr14:65720392-65769859 reverse strand
449	A_30_P01019064	0.025313	0.0155577	0.0340721	0.0247289	0.0678047	0.0287504	0.0553969	0.024063	0.0611625	0.0249809	0.040428	0.0468741	1.61835	1.15945	0.694527	0.213437	0.339452	0.705646	Not Detected	Not Detected	Not Detected	Not Detected	Not Detected	Not Detected	Not Detected	Not Detected	Not Detected	3	3	3	FALSE	A_30_P01019064	chr3:95454378-95454600_F										lincRNA:chr3:95454378-95454600 forward strand	chr3:95454481-95454540	mm|3qF2.1
450	A_30_P01019067	0.2647	0.279892	0.281059	0.171119	0.0672803	0.065244	0.0579983	0.0600735	0.124111	0.275217	0.101214	0.0807277	0.367762	0.797592	-1.44316	-0.326278	0.0722976	0.672081	Detected	Detected	Detected	Detected	Not Detected	Not Detected	Not Detected	Not Detected	Detected	0	2	2	FALSE	A_30_P01019067	chr9:88333945-88342370_R										lincRNA:chr9:88333945-88342370 reverse strand	chr9:88336748-88336689	mm|9qE3.1
451	A_30_P01019069	0.0719415	0.0441403	0.0970953	0.141177	0.138526	0.155584	0.0976353	0.205704	0.164803	0.071059	0.145096	0.156047	2.04191	1.07548	1.02992	0.104979	0.0765481	0.911201	Detected	Not Detected	Detected	Detected	Not Detected	Detected	Not Detected	Detected	Detected	1	1	1	FALSE	A_30_P01019069	chr4:155560296-155564642_F										lincRNA:chr4:155560296-155564642 forward strand	chr4:155564366-155564425	mm|4qE2
452	A_30_P01019070	0.0114885	0.0096809	0.0264842	0.0211378	0.0281249	0.026218	0.0207051	0.0243055	0.018289	0.0158845	0.0251603	0.0210999	1.58395	0.838619	0.663526	-0.253912	0.21046	0.21419	Not Detected	Not Detected	Not Detected	Not Detected	Not Detected	Not Detected	Not Detected	Not Detected	Not Detected	3	3	3	FALSE	A_30_P01019070	chr6:121036119-121036703_R										lincRNA:chr6:121036119-121036703 reverse strand	chr6:121036304-121036245	mm|6qF1
453	A_30_P01019078	0.53791	0.574135	0.572213	1.1037	0.679289	0.916706	1.00587	1.12434	0.670937	0.561419	0.899899	0.933716	1.6029	1.03758	0.680686	0.0532209	0.0821417	0.883502	Detected	Detected	Detected	Detected	Detected	Detected	Detected	Detected	Detected	0	0	0	FALSE	A_30_P01019078	chr13:65338067-65365992_R										lincRNA:chr13:65338067-65365992 reverse strand	chr13:65343335-65343276	mm|13qB3
454	A_30_P01019081	0.0727156	0.0533364	0.0565067	0.111318	0.0703838	0.104526	0.0910867	0.0720137	0.0973106	0.0608529	0.0954095	0.0868036	1.56787	0.909801	0.648807	-0.136378	0.0724486	0.655104	Detected	Detected	Detected	Not Detected	Not Detected	Not Detected	Not Detected	Not Detected	Detected	0	3	2	FALSE	A_30_P01019081	chr4:124202159-124202824_F										lincRNA:chr4:124202159-124202824 forward strand	chr4:124202738-124202797	mm|4qD2.2
455	A_30_P01019084	0.0698998	0.0830577	0.0687297	0.136572	0.121042	0.102918	0.098421	0.113213	0.0869605	0.0738957	0.120177	0.0995316	1.62631	0.828207	0.7016	-0.271936	0.0110245	0.169299	Detected	Detected	Detected	Detected	Detected	Not Detected	Detected	Detected	Detected	0	1	0	FALSE	A_30_P01019084	chr5:125078875-125098525_R										lincRNA:chr5:125078875-125098525 reverse strand	chr5:125092114-125092055	mm|5qF
456	A_30_P01019085	0.197045	0.130309	0.156533	0.101642	0.0270988	0.0253763	0.0581461	0.0568533	0.0365082	0.161296	0.0513722	0.0505025	0.318497	0.983071	-1.65065	-0.0246324	0.0875152	0.733236	Detected	Detected	Detected	Not Detected	Not Detected	Not Detected	Not Detected	Not Detected	Not Detected	0	3	3	FALSE	A_30_P01019085	chr5:105032961-105037248_F										lincRNA:chr5:105032961-105037248 forward strand	chr5:105036928-105036987	mm|5qE5
457	A_30_P01019086	2.32205	2.66188	2.14144	3.64863	5.00411	4.25012	4.9099	5.31759	5.47789	2.37512	4.30095	5.23513	1.81083	1.2172	0.856653	0.283568	0.00829865	0.143852	Detected	Detected	Detected	Detected	Detected	Detected	Detected	Detected	Detected	0	0	0	FALSE	A_30_P01019086	chr7:16633756-16634410_F										lincRNA:chr7:16633756-16634410 forward strand	chr7:16634351-16634410	mm|7qA2
458	A_30_P01019087	0.0101559	0.0109583	0.0088088	0.0188477	0.0296293	0.0238041	0.0188568	0.0216462	0.0156207	0.00997433	0.0240937	0.0187079	2.41557	0.776465	1.27236	-0.365007	0.0102453	0.210171	Not Detected	Not Detected	Not Detected	Not Detected	Not Detected	Not Detected	Not Detected	Not Detected	Not Detected	3	3	3	FALSE	A_30_P01019087	chrX:11688787-11689145_R										lincRNA:chrX:11688787-11689145 reverse strand	chrX:11688847-11688788	mm|XqA1.1
459	A_30_P01019092	0.0522874	0.0627502	0.0468607	0.061797	0.0613174	0.0421244	0.0582837	0.100249	0.0522186	0.0539661	0.0550796	0.0702503	1.02063	1.27543	0.0294653	0.350985	0.9392	0.424446	Not Detected	Detected	Not Detected	Not Detected	Not Detected	Not Detected	Not Detected	Not Detected	Not Detected	2	3	3	FALSE	A_30_P01019092	chr7:30645026-30667034_F										lincRNA:chr7:30645026-30667034 forward strand	chr7:30663403-30663462	mm|7qB1
460	A_30_P01019099	0.0127846	0.0171461	0.0109525	0.0235707	0.0314329	0.0293338	0.0234028	0.026747	0.0196312	0.0136277	0.0281125	0.0232603	2.06289	0.827403	1.04466	-0.273338	0.0134337	0.202189	Not Detected	Not Detected	Not Detected	Not Detected	Not Detected	Not Detected	Not Detected	Not Detected	Not Detected	3	3	3	FALSE	A_30_P01019099	chr4:147105275-147171025_R										lincRNA:chr4:147105275-147171025 reverse strand	chr4:147107488-147107429	mm|4qE2
461	A_30_P01019101	0.0177017	0.0123241	0.0149151	0.0242764	0.0276742	0.0258065	0.0205149	0.0606963	0.0175364	0.0149803	0.0259191	0.0329159	1.73021	1.26995	0.790948	0.34477	0.0229868	0.86238	Not Detected	Not Detected	Not Detected	Not Detected	Not Detected	Not Detected	Not Detected	Not Detected	Not Detected	3	3	3	FALSE	A_30_P01019101	chr8:40072950-40088400_R										lincRNA:chr8:40072950-40088400 reverse strand	chr8:40073186-40073127	mm|8qA4
462	A_30_P01019102	0.00993114	0.00848524	0.00856577	0.0181611	0.0241333	0.0228564	0.0180617	0.0211025	0.0157533	0.00899405	0.0217169	0.0183058	2.41459	0.842927	1.27178	-0.24652	0.00241741	0.232475	Not Detected	Not Detected	Not Detected	Not Detected	Not Detected	Not Detected	Not Detected	Not Detected	Not Detected	3	3	3	FALSE	A_30_P01019102	chr7:48794017-48815817_R										lincRNA:chr7:48794017-48815817 reverse strand	chr7:48800606-48800547	mm|7qB3
463	A_30_P01019103	0.0116414	0.00984986	0.00999265	0.021302	0.0283132	0.0264309	0.0207631	0.0245455	0.0185348	0.0104946	0.0253487	0.0212811	2.4154	0.839534	1.27226	-0.25234	0.00206483	0.214601	Not Detected	Not Detected	Not Detected	Not Detected	Not Detected	Not Detected	Not Detected	Not Detected	Not Detected	3	3	3	FALSE	A_30_P01019103	chr12:53708656-53729799_F										lincRNA:chr12:53708656-53729799 forward strand	chr12:53728399-53728458	mm|12qC1
464	A_30_P01019104	1.20504	1.10705	1.04975	1.56235	1.3683	1.35619	1.24879	1.35722	1.17584	1.12061	1.42895	1.26062	1.27515	0.882199	0.350666	-0.180823	0.0168948	0.114052	Detected	Detected	Detected	Detected	Detected	Detected	Detected	Detected	Detected	0	0	0	FALSE	A_30_P01019104	chr4:55593675-55629225_F										lincRNA:chr4:55593675-55629225 forward strand	chr4:55627486-55627545	mm|4qB3
465	A_30_P01019105	1.51186	1.6181	1.36977	1.40833	0.992857	0.660806	0.765525	0.882428	0.965278	1.49991	1.02067	0.871077	0.680485	0.853441	-0.555364	-0.228637	0.18375	0.654894	Detected	Detected	Detected	Detected	Detected	Detected	Detected	Detected	Detected	0	0	0	FALSE	A_30_P01019105	chr8:48480224-48480698_R										lincRNA:chr8:48480224-48480698 reverse strand	chr8:48480309-48480250	mm|8qB1.1
466	A_30_P01019107	0.158466	0.174134	0.21183	0.354785	0.271913	0.231044	0.338618	0.343138	0.269751	0.181476	0.285914	0.317169	1.57549	1.10932	0.655799	0.149672	0.0491171	0.491393	Detected	Detected	Detected	Detected	Detected	Detected	Detected	Detected	Detected	0	0	0	FALSE	A_30_P01019107	chr9:67414463-67483185_R										lincRNA:chr9:67414463-67483185 reverse strand	chr9:67425659-67425600	mm|9qC
467	A_30_P01019117	0.0254774	0.0217794	0.0126517	0.0218143	0.0479469	0.0294461	0.0212823	0.214275	0.0567448	0.0199695	0.0330691	0.0974342	1.65598	2.94638	0.727689	1.55894	0.190277	0.404017	Not Detected	Not Detected	Not Detected	Not Detected	Not Detected	Not Detected	Not Detected	Detected	Not Detected	3	3	2	FALSE	A_30_P01019117	chr12:85210777-85262127_F										lincRNA:chr12:85210777-85262127 forward strand	chr12:85216018-85216077	mm|12qD1
468	A_30_P01019118	0.0111958	0.00951248	0.00964462	0.0277251	0.0271859	0.0255037	0.0200429	0.0236892	0.0178497	0.0101176	0.0268049	0.0205272	2.64932	0.765802	1.40562	-0.384957	0.000567305	0.0690339	Not Detected	Not Detected	Not Detected	Not Detected	Not Detected	Not Detected	Not Detected	Not Detected	Not Detected	3	3	3	FALSE	A_30_P01019118	chr8:12535648-12544923_R										lincRNA:chr8:12535648-12544923 reverse strand	chr8:12541493-12541434	mm|8qA1.1
469	A_30_P01019123	0.141872	0.174905	0.250162	0.0268637	0.0260175	0.0425381	0.0195545	0.0224432	0.0385602	0.18898	0.0318064	0.0268526	0.168306	0.844252	-2.57084	-0.244255	0.00149686	0.514157	Detected	Detected	Detected	Not Detected	Not Detected	Not Detected	Not Detected	Not Detected	Not Detected	0	3	3	FALSE	A_30_P01019123	chr17:95150800-95180650_F										lincRNA:chr17:95150800-95180650 forward strand	chr17:95174242-95174301	mm|17qE5
470	A_30_P01019124	0.0104934	0.00888751	0.00900801	0.0194678	0.025827	0.0241875	0.0192394	0.0224213	0.0166544	0.00946298	0.0231608	0.0194384	2.44751	0.83928	1.29132	-0.252776	0.0019463	0.22096	Not Detected	Not Detected	Not Detected	Not Detected	Not Detected	Not Detected	Not Detected	Not Detected	Not Detected	3	3	3	FALSE	A_30_P01019124	chr5:115836050-115871725_R										lincRNA:chr5:115836050-115871725 reverse strand	chr5:115846740-115846681	mm|5qF
471	A_30_P01019126	2.75549	2.73904	2.80002	2.91065	4.37356	4.22151	4.47626	4.98642	5.34361	2.76485	3.83524	4.93543	1.38714	1.28686	0.472116	0.363858	0.139145	0.167564	Detected	Detected	Detected	Detected	Detected	Detected	Detected	Detected	Detected	0	0	0	FALSE	A_30_P01019126	chr17:13806767-13824342_F										lincRNA:chr17:13806767-13824342 forward strand	chr17:13820367-13820426	mm|17qA1
472	A_30_P01019128	0.336591	0.429439	0.255052	0.614805	0.292106	0.34402	0.249231	0.252021	0.357365	0.34036	0.416977	0.286206	1.2251	0.686383	0.292903	-0.542915	0.565156	0.276777	Detected	Detected	Detected	Detected	Detected	Detected	Detected	Detected	Detected	0	0	0	FALSE	A_30_P01019128	chr16:4585697-4594022_R										lincRNA:chr16:4585697-4594022 reverse strand	chr16:4593034-4592975	mm|16qA1
473	A_30_P01019131	0.0103617	0.00882104	0.00894255	0.0340025	0.029941	0.0239643	0.0247147	0.0221242	0.0305794	0.0093751	0.0293026	0.0258061	3.12558	0.880677	1.64412	-0.183315	0.00234635	0.418076	Not Detected	Not Detected	Not Detected	Not Detected	Not Detected	Not Detected	Not Detected	Not Detected	Not Detected	3	3	3	FALSE	A_30_P01019131	chr17:21752466-21793451_F										lincRNA:chr17:21752466-21793451 forward strand	chr17:21766230-21766289	mm|17qA3.2
474	A_30_P01019138	0.0125958	0.01065	0.0108055	0.0230514	0.0311445	0.241514	0.0224738	1.90049	0.0199127	0.0113504	0.09857	0.647626	8.68426	6.57021	3.1184	2.71594	0.162605	0.772491	Not Detected	Not Detected	Not Detected	Not Detected	Not Detected	Detected	Not Detected	Detected	Not Detected	3	2	2	FALSE	A_30_P01019138	chr14:76912477-76931702_R										lincRNA:chr14:76912477-76931702 reverse strand	chr14:76914081-76914022	mm|14qD3
475	A_30_P01019139	0.962243	0.943231	0.955946	1.04316	0.999553	0.795943	0.870223	1.05043	0.889626	0.953807	0.946219	0.936761	0.992044	0.990005	-0.0115233	-0.0144928	0.876367	0.950941	Detected	Detected	Detected	Detected	Detected	Detected	Detected	Detected	Detected	0	0	0	FALSE	A_30_P01019139	chr17:85418489-85427364_F										lincRNA:chr17:85418489-85427364 forward strand	chr17:85423018-85423077	mm|17qE4
476	A_30_P01019141	0.030717	0.0204342	0.0171433	0.0668925	0.0787483	0.065056	0.0278325	0.0246182	0.0379305	0.0227648	0.0702323	0.030127	3.08512	0.428963	1.62533	-1.22107	0.0140056	0.0107171	Not Detected	Not Detected	Not Detected	Not Detected	Not Detected	Not Detected	Not Detected	Not Detected	Not Detected	3	3	3	FALSE	A_30_P01019141	chr8:108153471-108159672_F										lincRNA:chr8:108153471-108159672 forward strand	chr8:108159553-108159612	mm|8qD3
477	A_30_P01019142	0.011697	0.00984328	0.00994403	0.0215835	0.0286418	0.0266903	0.0211383	0.0246868	0.0185398	0.0104948	0.0256385	0.021455	2.44298	0.836826	1.28864	-0.257001	0.00178241	0.208138	Not Detected	Not Detected	Not Detected	Not Detected	Not Detected	Not Detected	Not Detected	Not Detected	Not Detected	3	3	3	FALSE	A_30_P01019142	chr12:103151385-103157735_R										lincRNA:chr12:103151385-103157735 reverse strand	chr12:103157121-103157062	mm|12qE
478	A_30_P01019149	0.0437541	0.137874	0.0222473	0.020675	0.0273392	0.0259944	0.0204848	0.0234984	0.0171459	0.0679584	0.0246696	0.0203764	0.36301	0.825973	-1.46192	-0.275833	0.299276	0.200146	Not Detected	Detected	Not Detected	Not Detected	Not Detected	Not Detected	Not Detected	Not Detected	Not Detected	2	3	3	FALSE	A_30_P01019149	chr3:10081893-10094218_F										lincRNA:chr3:10081893-10094218 forward strand	chr3:10089561-10089620	mm|3qA1
479	A_30_P01019152	0.271616	0.261533	0.258818	0.111144	0.0315491	0.0507519	0.0700018	0.076985	0.0273728	0.263989	0.0644815	0.0581199	0.244258	0.901341	-2.03352	-0.149855	0.051827	0.905356	Detected	Detected	Detected	Not Detected	Not Detected	Not Detected	Not Detected	Not Detected	Not Detected	0	3	3	FALSE	A_30_P01019152	chr3:145313275-145315057_F										lincRNA:chr3:145313275-145315057 forward strand	chr3:145314877-145314936	mm|3qH2
480	A_30_P01019154	0.0571081	0.0637123	0.0744989	0.0376065	0.0265005	0.0467731	0.0544717	0.0229928	0.0217266	0.0651064	0.03696	0.0330637	0.567687	0.894581	-0.816833	-0.160717	0.0529419	0.633158	Detected	Detected	Detected	Not Detected	Not Detected	Not Detected	Not Detected	Not Detected	Not Detected	0	3	3	FALSE	A_30_P01019154	chr18:35967933-35986564_F										lincRNA:chr18:35967933-35986564 forward strand	chr18:35967951-35968010	mm|18qB2
481	A_30_P01019157	0.0317359	0.0599999	0.0548156	0.157462	0.0819972	0.123733	0.181802	0.174774	0.082212	0.0488505	0.121064	0.146262	2.47826	1.20814	1.30933	0.272788	0.029972	0.638598	Not Detected	Detected	Detected	Detected	Not Detected	Not Detected	Detected	Detected	Not Detected	1	2	1	FALSE	A_30_P01019157	chr16:22718344-22725594_F										lincRNA:chr16:22718344-22725594 forward strand	chr16:22722656-22722715	mm|16qB1
482	A_30_P01019160	0.0552076	0.0503769	0.00958027	0.0206861	0.0273624	0.0261441	0.0205586	0.023551	0.0174273	0.0383882	0.0247309	0.0205123	0.644231	0.82942	-0.634351	-0.269825	0.764644	0.202077	Not Detected	Detected	Not Detected	Not Detected	Not Detected	Not Detected	Not Detected	Not Detected	Not Detected	2	3	3	FALSE	A_30_P01019160	chr1:138442536-138521080_R										lincRNA:chr1:138442536-138521080 reverse strand	chr1:138478593-138478534	mm|1qE4
483	A_30_P01019161	0.0823478	0.0528928	0.0739664	0.164504	0.194126	0.0958554	0.0836253	0.144396	0.0912504	0.0697357	0.151495	0.106424	2.17242	0.702489	1.11931	-0.509453	0.0505601	0.282221	Detected	Detected	Detected	Detected	Detected	Not Detected	Not Detected	Detected	Not Detected	0	1	2	FALSE	A_30_P01019161	chr10:62262341-62269593_F										lincRNA:chr10:62262341-62269593 forward strand	chr10:62269533-62269592	mm|10qB4
484	A_30_P01019164	0.0118707	0.00999278	0.010099	0.021908	0.0289797	0.0270236	0.0214213	0.0249541	0.0187421	0.0106542	0.0259704	0.0217058	2.43759	0.835791	1.28545	-0.258787	0.00170818	0.202987	Not Detected	Not Detected	Not Detected	Not Detected	Not Detected	Not Detected	Not Detected	Not Detected	Not Detected	3	3	3	FALSE	A_30_P01019164	chr12:4554378-4560302_F										lincRNA:chr12:4554378-4560302 forward strand	chr12:4560148-4560207	mm|12qA1.1
485	A_30_P01019168	0.658935	0.652445	0.725313	1.77291	1.47334	1.47875	1.3891	1.33101	1.32717	0.678897	1.575	1.3491	2.31993	0.85657	1.21408	-0.223357	0.00102937	0.124763	Detected	Detected	Detected	Detected	Detected	Detected	Detected	Detected	Detected	0	0	0	FALSE	A_30_P01019168	chr15:102947390-102971082_F										lincRNA:chr15:102947390-102971082 forward strand	chr15:102966237-102966296	mm|15qF3
486	A_30_P01019170	0.278241	0.233838	0.324973	0.678217	0.632947	0.683849	0.746738	0.689736	0.502641	0.279017	0.665004	0.646372	2.38338	0.971981	1.25301	-0.0409996	0.00822923	0.764302	Detected	Detected	Detected	Detected	Detected	Detected	Detected	Detected	Detected	0	0	0	FALSE	A_30_P01019170	chr15:85421725-85424047_F										lincRNA:chr15:85421725-85424047 forward strand	chr15:85421931-85421990	mm|15qE2
487	A_30_P01019172	0.00975223	0.0161087	0.0783242	0.0181483	0.0241042	0.022769	0.051322	0.0209854	0.0189474	0.0347284	0.0216738	0.0304183	0.624095	1.40346	-0.680162	0.488986	0.921301	0.533315	Not Detected	Not Detected	Detected	Not Detected	Not Detected	Not Detected	Not Detected	Not Detected	Not Detected	2	3	3	FALSE	A_30_P01019172	chr19:29582018-29596693_F										lincRNA:chr19:29582018-29596693 forward strand	chr19:29596090-29596149	mm|19qC1
488	A_30_P01019173	1.96063	2.09074	1.91018	1.42475	1.17862	1.71399	1.34705	1.16116	1.30372	1.98718	1.43912	1.27064	0.7242	0.88293	-0.46554	-0.179629	0.0831698	0.406894	Detected	Detected	Detected	Detected	Detected	Detected	Detected	Detected	Detected	0	0	0	FALSE	A_30_P01019173	chr8:119092623-119094219_R										lincRNA:chr8:119092623-119094219 reverse strand	chr8:119092774-119092715	mm|8qE1
489	A_30_P01019180	0.0496685	0.0123377	0.00989467	0.024013	0.028224	0.0267998	0.0383293	0.0500066	0.0342357	0.023967	0.0263456	0.0408572	1.09925	1.55082	0.136514	0.633029	0.544701	0.0463061	Not Detected	Not Detected	Not Detected	Not Detected	Not Detected	Not Detected	Not Detected	Not Detected	Not Detected	3	3	3	FALSE	A_30_P01019180	chr6:128116450-128147150_F										lincRNA:chr6:128116450-128147150 forward strand	chr6:128133488-128133547	mm|6qF3
490	A_30_P01019182	0.0141154	0.014212	0.00923468	0.0198894	0.0262279	0.0251636	0.0198334	0.0227054	0.016687	0.0125207	0.0237603	0.0197419	1.89768	0.830879	0.92424	-0.26729	0.0249862	0.208058	Not Detected	Not Detected	Not Detected	Not Detected	Not Detected	Not Detected	Not Detected	Not Detected	Not Detected	3	3	3	FALSE	A_30_P01019182	chr1:138473514-138476054_R										lincRNA:chr1:138473514-138476054 reverse strand	chr1:138473928-138473869	mm|1qE4
491	A_30_P01019184	0.244611	0.283289	0.252038	0.233902	0.142043	0.125622	0.106125	0.218052	0.136957	0.259979	0.167189	0.153711	0.643086	0.919387	-0.636916	-0.121255	0.122009	0.762834	Detected	Detected	Detected	Detected	Not Detected	Not Detected	Not Detected	Detected	Detected	0	2	1	FALSE	A_30_P01019184	chr1:85036677-85038530_R										lincRNA:chr1:85036677-85038530 reverse strand	chr1:85038431-85038372	mm|1qC5
492	A_30_P01019185	0.56102	0.513446	0.5214	0.652275	0.643121	0.541254	0.531252	0.614267	0.585913	0.531955	0.612216	0.577144	1.15088	0.942713	0.202736	-0.0851098	0.134355	0.484475	Detected	Detected	Detected	Detected	Detected	Detected	Detected	Detected	Detected	0	0	0	FALSE	A_30_P01019185	chr13:99868423-99920944_R										lincRNA:chr13:99868423-99920944 reverse strand	chr13:99876078-99876019	mm|13qD1
493	A_30_P01019190	0.0121882	0.0102556	0.0103114	0.0223668	0.0298322	0.0278467	0.021935	0.025631	0.0192982	0.0109184	0.0266819	0.022288	2.44375	0.835325	1.28909	-0.259591	0.00193006	0.207958	Not Detected	Not Detected	Not Detected	Not Detected	Not Detected	Not Detected	Not Detected	Not Detected	Not Detected	3	3	3	FALSE	A_30_P01019190	chr11:95483973-95490751_F										lincRNA:chr11:95483973-95490751 forward strand	chr11:95485866-95485925	mm|11qD
494	A_30_P01019194	0.0560732	0.01004	0.149487	0.0230443	0.0288063	0.0270317	0.0214282	0.0246697	0.0189429	0.0718669	0.0262941	0.0216803	0.365872	0.824529	-1.45059	-0.278357	0.58137	0.12828	Not Detected	Not Detected	Detected	Not Detected	Not Detected	Not Detected	Not Detected	Not Detected	Not Detected	2	3	3	FALSE	A_30_P01019194	chrX:155945151-155945654_R										lincRNA:chrX:155945151-155945654 reverse strand	chrX:155945641-155945582	mm|XqF4
495	A_30_P01019201	1.86153	1.48477	1.53531	3.79511	3.21596	3.24371	2.6865	3.00885	2.97208	1.62721	3.41826	2.88914	2.10069	0.845209	1.07087	-0.242619	0.00146897	0.0707533	Detected	Detected	Detected	Detected	Detected	Detected	Detected	Detected	Detected	0	0	0	FALSE	A_30_P01019201	chr7:108209996-108216032_F										lincRNA:chr7:108209996-108216032 forward strand
496	A_30_P01019206	0.147125	0.12583	0.105843	0.141722	0.133711	0.140792	0.163612	0.217953	0.160512	0.126266	0.138742	0.180692	1.09881	1.30237	0.135937	0.381134	0.39281	0.119241	Detected	Detected	Detected	Detected	Not Detected	Not Detected	Detected	Detected	Detected	0	2	0	FALSE	A_30_P01019206	chr11:117768049-117807949_R										lincRNA:chr11:117768049-117807949 reverse strand	chr11:117793062-117793003	mm|11qE2
497	A_30_P01019207	0.0694628	0.063261	0.0562844	0.212177	0.0715708	0.0864677	0.085137	0.0640993	0.0334918	0.0630027	0.123405	0.0609094	1.95873	0.493572	0.969917	-1.01867	0.236331	0.207256	Detected	Detected	Detected	Detected	Not Detected	Not Detected	Not Detected	Not Detected	Not Detected	0	2	3	FALSE	A_30_P01019207	chr10:95772764-95825001_F										lincRNA:chr10:95772764-95825001 forward strand	chr10:95824660-95824719	mm|10qC3
498	A_30_P01019213	0.0188165	0.019255	0.0113991	0.0509658	0.0677251	0.0237478	0.0240271	0.0217812	0.0163106	0.0164902	0.0474796	0.0207063	2.87926	0.43611	1.5257	-1.19724	0.0657936	0.124904	Not Detected	Not Detected	Not Detected	Not Detected	Not Detected	Not Detected	Not Detected	Not Detected	Not Detected	3	3	3	FALSE	A_30_P01019213	chr9:56914085-56914489_F										lincRNA:chr9:56914085-56914489 forward strand	chr9:56914289-56914348	mm|9qB
499	A_30_P01019218	0.190408	0.259126	0.2708	0.265926	0.296263	0.18531	0.309116	0.219447	0.157174	0.240111	0.249166	0.228579	1.03771	0.917375	0.0534058	-0.124416	0.878035	0.688622	Detected	Detected	Detected	Detected	Detected	Detected	Detected	Detected	Detected	0	0	0	FALSE	A_30_P01019218	chr5:107503800-107515575_R										lincRNA:chr5:107503800-107515575 reverse strand	chr5:107513953-107513894	mm|5qE5
500	A_30_P01019227	0.0110201	0.00944926	0.00937912	0.0201399	0.0266212	0.47205	0.0198179	0.0228291	0.0170521	0.00994949	0.172937	0.0198997	17.3815	0.115069	4.11948	-3.11943	0.207263	0.36767	Not Detected	Not Detected	Not Detected	Not Detected	Not Detected	Detected	Not Detected	Not Detected	Not Detected	3	2	3	FALSE	A_30_P01019227	chr17:38132217-38157667_R										lincRNA:chr17:38132217-38157667 reverse strand
501	A_30_P01019229	0.00991644	0.0299404	0.0351999	0.0172845	0.02309	0.0218768	0.0173968	0.0201328	0.0147524	0.0250189	0.0207504	0.0174273	0.829391	0.839854	-0.269876	-0.25179	0.895555	0.238679	Not Detected	Not Detected	Not Detected	Not Detected	Not Detected	Not Detected	Not Detected	Not Detected	Not Detected	3	3	3	FALSE	A_30_P01019229	chr12:33604247-33638654_R										lincRNA:chr12:33604247-33638654 reverse strand	chr12:33604315-33604256	mm|12qA3
502	A_30_P01019232	0.727562	0.846125	0.667823	0.914159	1.49314	1.23721	1.29576	2.15327	1.92396	0.74717	1.21484	1.791	1.62592	1.47427	0.701254	0.56	0.0621237	0.140837	Detected	Detected	Detected	Detected	Detected	Detected	Detected	Detected	Detected	0	0	0	FALSE	A_30_P01019232	chr10:69679644-69682458_F										lincRNA:chr10:69679644-69682458 forward strand	chr10:69682391-69682450	mm|10qB5.3
503	A_30_P01019237	0.0105573	0.0268891	0.0201568	0.0474307	0.0259115	0.0247878	0.0315993	0.0224568	0.0164517	0.0192011	0.03271	0.0235026	1.70355	0.718515	0.768545	-0.47691	0.188379	0.320387	Not Detected	Not Detected	Not Detected	Not Detected	Not Detected	Not Detected	Not Detected	Not Detected	Not Detected	3	3	3	FALSE	A_30_P01019237	chr1:88339354-88345004_R										lincRNA:chr1:88339354-88345004 reverse strand	chr1:88340156-88340097	mm|1qD
504	A_30_P01019241	0.0144868	0.00793481	0.00948526	0.02801	0.0228861	0.0217063	0.0439208	0.0199151	0.0145653	0.0106356	0.0242008	0.0261337	2.27545	1.07987	1.18615	0.110859	0.026978	0.937815	Not Detected	Not Detected	Not Detected	Not Detected	Not Detected	Not Detected	Not Detected	Not Detected	Not Detected	3	3	3	FALSE	A_30_P01019241	chr2:154235540-154248551_F										lincRNA:chr2:154235540-154248551 forward strand	chr2:154246149-154246208	mm|2qH1
505	A_30_P01019242	0.176387	0.17434	0.136265	0.0356645	0.080136	0.127809	0.133938	0.116131	0.0993519	0.162331	0.0812031	0.116474	0.500232	1.43435	-0.999331	0.520397	0.155318	0.325325	Detected	Detected	Detected	Not Detected	Not Detected	Not Detected	Detected	Not Detected	Detected	0	3	1	FALSE	A_30_P01019242	chr17:45524689-45525320_R										lincRNA:chr17:45524689-45525320 reverse strand	chr17:45525003-45524944	mm|17qB3
506	A_30_P01019246	0.0114005	0.00962833	0.00975742	0.0218703	0.0973129	0.0259695	0.0204683	0.0241087	0.0181662	0.0102621	0.0483842	0.0209144	4.71485	0.432256	2.23721	-1.21004	0.106333	0.326578	Not Detected	Not Detected	Not Detected	Not Detected	Not Detected	Not Detected	Not Detected	Not Detected	Not Detected	3	3	3	FALSE	A_30_P01019246	chr6:66994066-67034841_F										lincRNA:chr6:66994066-67034841 forward strand	chr6:67021639-67021698	mm|6qC1
507	A_30_P01019247	0.0975998	0.0810298	0.0820326	0.128956	0.0591901	0.0259937	0.0358068	0.0580403	0.0615941	0.0868874	0.0713799	0.0518137	0.821522	0.725887	-0.283629	-0.462183	0.4837	0.789627	Detected	Detected	Detected	Detected	Not Detected	Not Detected	Not Detected	Not Detected	Not Detected	0	2	3	FALSE	A_30_P01019247	chr17:17371885-17406679_F										lincRNA:chr17:17371885-17406679 forward strand	chr17:17406620-17406679	mm|17qA3.1
508	A_30_P01019253	0.0149666	0.0248804	0.0491934	0.0719256	0.0317397	0.0280987	0.0427274	0.0737361	0.0567792	0.0296801	0.0439214	0.0577476	1.47982	1.31479	0.565425	0.394838	0.410501	0.380822	Not Detected	Not Detected	Not Detected	Not Detected	Not Detected	Not Detected	Not Detected	Not Detected	Not Detected	3	3	3	FALSE	A_30_P01019253	chr16:57811599-58042454_F										lincRNA:chr16:57811599-58042454 forward strand	chr16:58029251-58029310	mm|16qC1.1
509	A_30_P01019258	0.152051	0.170999	0.236271	0.335372	0.243034	0.188399	0.221835	0.365433	0.274485	0.18644	0.255602	0.287251	1.37096	1.12382	0.455184	0.168412	0.22791	0.605957	Detected	Detected	Detected	Detected	Detected	Detected	Detected	Detected	Detected	0	0	0	FALSE	A_30_P01019258	chr16:29804864-29815614_R										lincRNA:chr16:29804864-29815614 reverse strand	chr16:29813026-29812967	mm|16qB2
510	A_30_P01019261	0.0107376	0.00916544	0.00926727	0.0196288	0.0260304	0.0245614	0.0193141	0.0227611	0.0171001	0.00972343	0.0234069	0.0197251	2.40727	0.842707	1.2674	-0.246898	0.0022962	0.226054	Not Detected	Not Detected	Not Detected	Not Detected	Not Detected	Not Detected	Not Detected	Not Detected	Not Detected	3	3	3	FALSE	A_30_P01019261	chrX:147610870-147614259_F										lincRNA:chrX:147610870-147614259 forward strand	chrX:147614088-147614147	mm|XqF3
511	A_30_P01019262	0.011633	0.00989246	0.0130921	0.0501305	0.027854	0.0259027	0.0206123	0.0237445	0.0206299	0.0115392	0.0346291	0.0216622	3.001	0.625551	1.58544	-0.676801	0.024797	0.173744	Not Detected	Not Detected	Not Detected	Not Detected	Not Detected	Not Detected	Not Detected	Not Detected	Not Detected	3	3	3	FALSE	A_30_P01019262	chr8:37582187-37621987_F										lincRNA:chr8:37582187-37621987 forward strand	chr8:37597047-37597106	mm|8qA4
512	A_30_P01019263	0.0119616	0.0101875	0.0102386	0.0220737	0.0289377	0.0269943	0.0215756	0.0252095	0.0184592	0.0107959	0.0260019	0.0217481	2.40849	0.836403	1.26813	-0.257729	0.00164084	0.211797	Not Detected	Not Detected	Not Detected	Not Detected	Not Detected	Not Detected	Not Detected	Not Detected	Not Detected	3	3	3	FALSE	A_30_P01019263	chr2:168136823-168137075_R										lincRNA:chr2:168136823-168137075 reverse strand	chr2:168136976-168136917	mm|2qH3
513	A_30_P01019265	0.0118265	0.0099517	0.01001	0.0214388	0.028096	0.0683606	0.0207803	0.023942	0.0179993	0.0105961	0.0392985	0.0209072	3.70877	0.532011	1.89094	-0.910472	0.0738538	0.281455	Not Detected	Not Detected	Not Detected	Not Detected	Not Detected	Not Detected	Not Detected	Not Detected	Not Detected	3	3	3	FALSE	A_30_P01019265	chr12:18874250-18911150_R										lincRNA:chr12:18874250-18911150 reverse strand	chr12:18878258-18878199	mm|12qA1.2
514	A_30_P01019267	0.137642	0.115271	0.0835706	0.165822	0.0873116	0.106605	0.0677315	0.0925908	0.0793453	0.112161	0.119913	0.0798892	1.06911	0.666226	0.0964135	-0.585917	0.843379	0.174475	Detected	Detected	Detected	Detected	Not Detected	Not Detected	Not Detected	Not Detected	Detected	0	2	2	FALSE	A_30_P01019267	chr4:136856064-136875614_R										lincRNA:chr4:136856064-136875614 reverse strand	chr4:136873255-136873196	mm|4qD3
515	A_30_P01019268	0.0474685	0.0524444	0.0742532	0.0872907	0.0775029	0.0636586	0.0554703	0.0817643	0.0657592	0.0580554	0.0761507	0.0676646	1.31169	0.888561	0.391428	-0.170457	0.170207	0.448159	Detected	Detected	Detected	Detected	Not Detected	Not Detected	Not Detected	Not Detected	Not Detected	0	2	3	FALSE	A_30_P01019268	chr6:90937606-90938335_R										lincRNA:chr6:90937606-90938335 reverse strand	chr6:90937726-90937667	mm|6qD1
516	A_30_P01019269	3.32396	3.07825	2.87933	3.46122	5.49622	4.79423	4.9463	5.60944	5.51491	3.09385	4.58389	5.35689	1.48161	1.16863	0.56717	0.224821	0.10054	0.335204	Detected	Detected	Detected	Detected	Detected	Detected	Detected	Detected	Detected	0	0	0	FALSE	A_30_P01019269	chr12:112224193-112225328_R										lincRNA:chr12:112224193-112225328 reverse strand	chr12:112224733-112224674	mm|12qF1
517	A_30_P01019271	1.28386	1.24701	1.24562	0.654179	0.74243	0.764971	0.793597	0.721634	0.683077	1.25883	0.720527	0.73277	0.572379	1.01699	-0.804958	0.0243073	0.00558983	0.804501	Detected	Detected	Detected	Detected	Detected	Detected	Detected	Detected	Detected	0	0	0	FALSE	A_30_P01019271	chr6:54591416-54597566_F										lincRNA:chr6:54591416-54597566 forward strand	chr6:54595473-54595532	mm|6qB3
518	A_30_P01019276	0.0125381	0.0105632	0.0106107	0.0228942	0.192365	0.0285947	0.0224089	0.0262577	0.0198073	0.0112373	0.0812846	0.0228246	7.23344	0.280799	2.85468	-1.83239	0.155877	0.360952	Not Detected	Not Detected	Not Detected	Not Detected	Detected	Not Detected	Not Detected	Not Detected	Not Detected	3	2	3	FALSE	A_30_P01019276	chr8:117956760-117958872_R										lincRNA:chr8:117956760-117958872 reverse strand	chr8:117956897-117956838	mm|8qE1
519	A_30_P01019278	0.0173695	0.0124641	0.0132801	0.0364368	0.0288727	0.026901	0.0212657	0.0248734	0.0187063	0.0143712	0.0307368	0.0216151	2.13878	0.703232	1.09679	-0.507927	0.00526239	0.0473728	Not Detected	Not Detected	Not Detected	Not Detected	Not Detected	Not Detected	Not Detected	Not Detected	Not Detected	3	3	3	FALSE	A_30_P01019278	chr12:110870903-110891628_F										lincRNA:chr12:110870903-110891628 forward strand	chr12:110885159-110885218	mm|12qF1
520	A_30_P01019280	0.464091	0.476881	0.415884	1.76415	0.820422	1.22716	1.38222	1.49354	0.560881	0.452286	1.27058	1.14555	2.80924	0.901594	1.49018	-0.14945	0.0425486	0.731424	Detected	Detected	Detected	Detected	Detected	Detected	Detected	Detected	Detected	0	0	0	FALSE	A_30_P01019280	chr8:91569369-91594119_R										lincRNA:chr8:91569369-91594119 reverse strand	chr8:91569601-91569542	mm|8qC3
521	A_30_P01019285	0.0243866	0.00919908	0.0114894	0.0627341	0.0471026	0.046213	0.0682888	0.0523453	0.0244314	0.015025	0.0520166	0.0483552	3.46199	0.929611	1.7916	-0.105301	0.0354748	0.683411	Not Detected	Not Detected	Not Detected	Not Detected	Not Detected	Not Detected	Not Detected	Not Detected	Not Detected	3	3	3	FALSE	A_30_P01019285	chr5:124697599-124700029_F										lincRNA:chr5:124697599-124700029 forward strand	chr5:124699633-124699692	mm|5qF
522	A_30_P01019286	0.0284808	0.0330344	0.0412494	0.0576371	0.0466679	0.0759962	0.0889325	0.0485766	0.0323202	0.0342549	0.0601004	0.0566097	1.75451	0.94192	0.811065	-0.0863241	0.0389763	0.72391	Not Detected	Not Detected	Not Detected	Not Detected	Not Detected	Not Detected	Not Detected	Not Detected	Not Detected	3	3	3	FALSE	A_30_P01019286	chr12:45415565-45423519_R										lincRNA:chr12:45415565-45423519 reverse strand
523	A_30_P01019302	0.457684	0.405224	0.412543	0.511995	0.393919	0.410996	0.237534	0.218565	0.297246	0.42515	0.43897	0.251115	1.0325	0.572055	0.0461478	-0.805774	0.78643	0.0106166	Detected	Detected	Detected	Detected	Detected	Detected	Detected	Detected	Detected	0	0	0	FALSE	A_30_P01019302	chr5:113594167-113645342_R										lincRNA:chr5:113594167-113645342 reverse strand	chr5:113626623-113626564	mm|5qF
524	A_30_P01019307	0.0157857	0.0132119	0.0289909	0.0229121	0.0267918	0.0251832	0.17459	0.0229584	0.0492755	0.0193295	0.0249624	0.0822746	1.29141	3.29594	0.368951	1.72069	0.318	0.287309	Not Detected	Not Detected	Not Detected	Not Detected	Not Detected	Not Detected	Detected	Not Detected	Not Detected	3	3	2	FALSE	A_30_P01019307	chr4:88583425-88584070_R										lincRNA:chr4:88583425-88584070 reverse strand	chr4:88583485-88583426	mm|4qC4
525	A_30_P01019311	0.0111413	0.00942376	0.00945704	0.0201612	0.0264983	0.0247284	0.02073	0.022634	0.0170228	0.0100074	0.023796	0.0201289	2.37784	0.845897	1.24965	-0.241445	0.0016952	0.226944	Not Detected	Not Detected	Not Detected	Not Detected	Not Detected	Not Detected	Not Detected	Not Detected	Not Detected	3	3	3	FALSE	A_30_P01019311	chr13:62364360-62381775_F										lincRNA:chr13:62364360-62381775 forward strand	chr13:62376772-62376831	mm|13qB3
526	A_30_P01019313	0.045912	0.0433264	0.0117915	0.0193278	0.0256706	0.0671224	0.0190589	0.022411	0.0168118	0.0336766	0.0373736	0.0194272	1.10978	0.519811	0.150273	-0.943941	0.850944	0.306078	Not Detected	Not Detected	Not Detected	Not Detected	Not Detected	Not Detected	Not Detected	Not Detected	Not Detected	3	3	3	FALSE	A_30_P01019313	chr3:26982754-26983352_R										lincRNA:chr3:26982754-26983352 reverse strand	chr3:26983140-26983081	mm|3qA3
527	A_30_P01019320	1.9285	1.92431	2.15457	2.43159	3.06153	2.63709	3.14671	3.606	3.05941	2.00246	2.71007	3.27071	1.35337	1.20687	0.436556	0.271273	0.0282022	0.0927249	Detected	Detected	Detected	Detected	Detected	Detected	Detected	Detected	Detected	0	0	0	FALSE	A_30_P01019320	chr7:31709550-31723025_F										lincRNA:chr7:31709550-31723025 forward strand	chr7:31710791-31710850	mm|7qB1
528	A_30_P01019322	0.300656	0.270309	0.304755	0.353063	0.155891	0.237194	0.311141	0.322666	0.219149	0.291907	0.248716	0.284319	0.852039	1.14315	-0.231009	0.193011	0.462106	0.559923	Detected	Detected	Detected	Detected	Not Detected	Detected	Detected	Detected	Detected	0	1	0	FALSE	A_30_P01019322	chr9:96635508-96654148_R										lincRNA:chr9:96635508-96654148 reverse strand	chr9:96646970-96646911	mm|9qE3.3
529	A_30_P01019326	0.0206986	0.0259637	0.0285592	0.0645182	0.0251342	0.0337267	0.0249456	0.0216212	0.0454782	0.0250738	0.0411264	0.0306817	1.64021	0.746034	0.71388	-0.422686	0.264198	0.50031	Not Detected	Not Detected	Not Detected	Not Detected	Not Detected	Not Detected	Not Detected	Not Detected	Not Detected	3	3	3	FALSE	A_30_P01019326	chr15:73455424-73477275_F										lincRNA:chr15:73455424-73477275 forward strand	chr15:73469746-73469805	mm|15qD3
530	A_30_P01019328	0.379336	0.361961	0.355311	0.305553	0.242476	0.235682	0.219768	0.295237	0.215154	0.365536	0.261237	0.243386	0.71467	0.931667	-0.484652	-0.102113	0.0465901	0.601075	Detected	Detected	Detected	Detected	Detected	Detected	Detected	Detected	Detected	0	0	0	FALSE	A_30_P01019328	chr3:36280098-36347798_R										lincRNA:chr3:36280098-36347798 reverse strand	chr3:36347467-36347408	mm|3qB
531	A_30_P01019332	0.139575	0.119096	0.123874	0.205498	0.176117	0.194964	0.142634	0.174121	0.188296	0.127515	0.192193	0.16835	1.50722	0.875945	0.591888	-0.191088	0.00338854	0.238953	Detected	Detected	Detected	Detected	Detected	Detected	Detected	Detected	Detected	0	0	0	FALSE	A_30_P01019332	chr7:88668435-88674440_F										lincRNA:chr7:88668435-88674440 forward strand	chr7:88674381-88674440	mm|7qD3
532	A_30_P01019349	0.0518175	0.0332555	0.0597736	0.0818221	0.0793295	0.102254	0.0905358	0.0628611	0.0410485	0.0482822	0.087802	0.0648151	1.81852	0.738196	0.862762	-0.437923	0.0544378	0.263801	Detected	Not Detected	Detected	Not Detected	Not Detected	Not Detected	Detected	Not Detected	Not Detected	1	3	2	FALSE	A_30_P01019349	chr13:99472132-99472291_F										lincRNA:chr13:99472132-99472291 forward strand	chr13:99472134-99472193	mm|13qD1
533	A_30_P01019354	0.0125201	0.0106048	0.0107531	0.023229	0.0307674	0.0288327	0.0228056	0.0260607	0.0193801	0.0112927	0.0276097	0.0227488	2.44493	0.823942	1.28979	-0.279385	0.00190827	0.183259	Not Detected	Not Detected	Not Detected	Not Detected	Not Detected	Not Detected	Not Detected	Not Detected	Not Detected	3	3	3	FALSE	A_30_P01019354	chr8:87504644-87513694_F										lincRNA:chr8:87504644-87513694 forward strand	chr8:87512873-87512932	mm|8qC3
534	A_30_P01019356	0.0318591	0.0392153	0.0415172	0.046099	0.0314862	0.0510052	0.0445773	0.0520186	0.0286435	0.0375305	0.0428635	0.0417465	1.1421	0.97394	0.191684	-0.0380945	0.528376	0.883621	Not Detected	Not Detected	Not Detected	Not Detected	Not Detected	Not Detected	Not Detected	Not Detected	Not Detected	3	3	3	FALSE	A_30_P01019356	chr14:65436123-65436905_R										lincRNA:chr14:65436123-65436905 reverse strand	chr14:65436568-65436509	mm|14qD1
535	A_30_P01019361	0.0449897	0.0451792	0.0570608	0.0508361	0.0539484	0.0290763	0.0426991	0.0494824	0.0292867	0.0490766	0.0446203	0.0404894	0.909197	0.907422	-0.137335	-0.140154	0.602649	0.754287	Not Detected	Not Detected	Detected	Not Detected	Not Detected	Not Detected	Not Detected	Not Detected	Not Detected	2	3	3	FALSE	A_30_P01019361	chr4:130039725-130069550_R										lincRNA:chr4:130039725-130069550 reverse strand	chr4:130039950-130039891	mm|4qD2.2
536	A_30_P01019364	0.0498242	0.0902395	0.134514	0.23025	0.73164	0.243679	0.24455	0.215399	0.161892	0.0915258	0.401856	0.207281	4.39063	0.515808	2.13443	-0.955095	0.0448702	0.296774	Not Detected	Detected	Detected	Detected	Detected	Detected	Detected	Detected	Detected	1	0	0	FALSE	A_30_P01019364	chr13:112648658-112719303_R										lincRNA:chr13:112648658-112719303 reverse strand	chr13:112719069-112719010	mm|13qD2.2
537	A_30_P01019373	0.0362462	0.0439536	0.0421672	0.0507628	0.0242619	0.0646349	0.0506014	0.0569547	0.0284049	0.040789	0.0465532	0.0453203	1.14132	0.973518	0.1907	-0.0387212	0.866907	0.980938	Not Detected	Detected	Not Detected	Not Detected	Not Detected	Not Detected	Not Detected	Not Detected	Not Detected	2	3	3	FALSE	A_30_P01019373	chr1:94077221-94091396_F										lincRNA:chr1:94077221-94091396 forward strand	chr1:94090449-94090508	mm|1qD
538	A_30_P01019377	0.705487	0.683732	0.664973	0.844183	0.974563	0.850646	0.909069	0.955197	0.888261	0.684731	0.889797	0.917509	1.29949	1.03114	0.377941	0.0442452	0.0205608	0.575407	Detected	Detected	Detected	Detected	Detected	Detected	Detected	Detected	Detected	0	0	0	FALSE	A_30_P01019377	chr11:79551860-79552221_R										lincRNA:chr11:79551860-79552221 reverse strand	chr11:79552145-79552086	mm|11qB5
539	A_30_P01019380	0.70326	0.81786	0.963238	1.22955	0.682151	1.07536	1.50534	1.29073	0.886641	0.828119	0.995689	1.22757	1.20235	1.23289	0.265856	0.30204	0.47682	0.416256	Detected	Detected	Detected	Detected	Detected	Detected	Detected	Detected	Detected	0	0	0	FALSE	A_30_P01019380	chr16:4867322-4874772_F										lincRNA:chr16:4867322-4874772 forward strand	chr16:4872175-4872234	mm|16qA1
540	A_30_P01019383	0.221827	0.191689	0.239475	0.138234	0.11682	0.0869686	0.102471	0.13288	0.0999649	0.217664	0.114008	0.111772	0.523779	0.980388	-0.93297	-0.0285751	0.0237533	0.952512	Detected	Detected	Detected	Detected	Not Detected	Not Detected	Detected	Detected	Detected	0	2	0	FALSE	A_30_P01019383	chr3:65729664-65731697_R										lincRNA:chr3:65729664-65731697 reverse strand	chr3:65729778-65729719	mm|3qE1
541	A_30_P01019388	0.0101403	0.00861116	0.00964417	0.0188082	0.0249937	0.023476	0.0186744	0.0217407	0.0160953	0.0094652	0.022426	0.0188368	2.36931	0.839954	1.24447	-0.251617	0.00268591	0.226609	Not Detected	Not Detected	Not Detected	Not Detected	Not Detected	Not Detected	Not Detected	Not Detected	Not Detected	3	3	3	FALSE	A_30_P01019388	chr16:25517037-25531362_F										lincRNA:chr16:25517037-25531362 forward strand	chr16:25527263-25527322	mm|16qB1
542	A_30_P01019391	0.0121628	0.0103018	0.0104684	0.0222516	0.0298186	0.0277032	0.0216763	0.0257081	0.0193882	0.0109777	0.0265911	0.0222575	2.4223	0.837027	1.27637	-0.256653	0.00234856	0.215044	Not Detected	Not Detected	Not Detected	Not Detected	Not Detected	Not Detected	Not Detected	Not Detected	Not Detected	3	3	3	FALSE	A_30_P01019391	chr16:91187988-91188416_R										lincRNA:chr16:91187988-91188416 reverse strand	chr16:91188268-91188209	mm|16qC3.3
543	A_30_P01019393	0.0123241	0.0158421	0.0104425	0.0224708	0.0299964	0.0283179	0.034341	0.0258446	0.0194258	0.0128696	0.0269284	0.0265371	2.09241	0.98547	1.06516	-0.0211168	0.00960882	0.867174	Not Detected	Not Detected	Not Detected	Not Detected	Not Detected	Not Detected	Not Detected	Not Detected	Not Detected	3	3	3	FALSE	A_30_P01019393	chr1:121201987-121223410_R										lincRNA:chr1:121201987-121223410 reverse strand	chr1:121206348-121206289	mm|1qE2.3
544	A_30_P01019400	0.0387122	0.0240009	0.0445162	0.0225652	0.0297413	0.033217	0.0243368	0.042633	0.0731754	0.0357431	0.0285079	0.046715	0.797577	1.63867	-0.326305	0.712527	0.411105	0.328104	Not Detected	Not Detected	Not Detected	Not Detected	Not Detected	Not Detected	Not Detected	Not Detected	Not Detected	3	3	3	FALSE	A_30_P01019400	chr16:94775095-94775634_F										lincRNA:chr16:94775095-94775634 forward strand	chr16:94775458-94775517	mm|16qC4
545	A_30_P01019405	0.0114971	0.00969254	0.00981852	0.0379063	0.0281054	0.0262037	0.0208268	0.0242441	0.0181476	0.0103361	0.0307385	0.0210729	2.97391	0.685553	1.57236	-0.544661	0.00382648	0.0628323	Not Detected	Not Detected	Not Detected	Not Detected	Not Detected	Not Detected	Not Detected	Not Detected	Not Detected	3	3	3	FALSE	A_30_P01019405	chrX:20381171-20381562_F										lincRNA:chrX:20381171-20381562 forward strand	chrX:20381357-20381416	mm|XqA1.3
546	A_30_P01019412	0.0117756	0.00992297	0.0100495	0.0217739	0.0287026	0.0267645	0.0212556	0.0247226	0.0185506	0.0105827	0.025747	0.0215096	2.43293	0.835421	1.2827	-0.259424	0.00164031	0.199721	Not Detected	Not Detected	Not Detected	Not Detected	Not Detected	Not Detected	Not Detected	Not Detected	Not Detected	3	3	3	FALSE	A_30_P01019412	chr7:131819366-131852866_R										lincRNA:chr7:131819366-131852866 reverse strand	chr7:131844784-131844725	mm|7qF3
547	A_30_P01019413	0.0119926	0.0238055	0.0211543	0.022113	0.0289935	0.0269081	0.0215028	0.0250308	0.0184178	0.0189841	0.0260049	0.0216505	1.36982	0.832554	0.45399	-0.264384	0.234775	0.198841	Not Detected	Not Detected	Not Detected	Not Detected	Not Detected	Not Detected	Not Detected	Not Detected	Not Detected	3	3	3	FALSE	A_30_P01019413	chr12:56564855-56565310_R										lincRNA:chr12:56564855-56565310 reverse strand	chr12:56564953-56564894	mm|12qC1
548	A_30_P01019414	0.0147557	0.020317	0.0106203	0.0228271	0.0304138	0.0282839	0.027656	0.0257447	0.0189154	0.015231	0.0271749	0.0241054	1.78418	0.887044	0.835264	-0.172923	0.0654863	0.438574	Not Detected	Not Detected	Not Detected	Not Detected	Not Detected	Not Detected	Not Detected	Not Detected	Not Detected	3	3	3	FALSE	A_30_P01019414	chr13:94187304-94188195_R										lincRNA:chr13:94187304-94188195 reverse strand	chr13:94187399-94187340	mm|13qC3
549	A_30_P01019416	0.0126608	0.0106877	0.0106704	0.023066	0.0310088	0.0290774	0.0227345	0.0265224	0.0393428	0.0113396	0.0277174	0.0295332	2.4443	1.06551	1.28942	0.091546	0.00226531	0.828604	Not Detected	Not Detected	Not Detected	Not Detected	Not Detected	Not Detected	Not Detected	Not Detected	Not Detected	3	3	3	FALSE	A_30_P01019416	chr1:138518674-138521227_R										lincRNA:chr1:138518674-138521227 reverse strand	chr1:138518736-138518677	mm|1qE4
550	A_30_P01019417	0.0104242	0.00888319	0.00890257	0.0355624	0.0249269	0.0323435	0.0186231	0.0214781	0.0161067	0.00940333	0.0309443	0.018736	3.29078	0.605475	1.71843	-0.72386	0.00235238	0.0231982	Not Detected	Not Detected	Not Detected	Not Detected	Not Detected	Not Detected	Not Detected	Not Detected	Not Detected	3	3	3	FALSE	A_30_P01019417	chr3:145390505-145398253_F										lincRNA:chr3:145390505-145398253 forward strand	chr3:145397952-145398011	mm|3qH2
551	A_30_P01019426	1.2919	1.18913	1.23177	1.76572	1.71758	1.52884	1.45746	1.68808	1.50771	1.2376	1.67071	1.55108	1.34996	0.928397	0.432916	-0.107186	0.00875532	0.300633	Detected	Detected	Detected	Detected	Detected	Detected	Detected	Detected	Detected	0	0	0	FALSE	A_30_P01019426	chr5:113768412-113769110_R										lincRNA:chr5:113768412-113769110 reverse strand	chr5:113768472-113768413	mm|5qF
552	A_30_P01019429	0.0114319	0.00964636	0.00979656	0.0209886	1.18204	0.0261339	0.0207755	0.0237947	0.0174366	0.0102916	0.40972	0.0206689	39.8111	0.0504465	5.3151	-4.3091	0.244634	0.385867	Not Detected	Not Detected	Not Detected	Not Detected	Detected	Not Detected	Not Detected	Not Detected	Not Detected	3	2	3	FALSE	A_30_P01019429	chr3:18521534-18522194_R										lincRNA:chr3:18521534-18522194 reverse strand	chr3:18521824-18521765	mm|3qA2
553	A_30_P01019433	0.0109883	0.00939926	0.00951619	0.0204826	0.0311493	0.0253208	0.0201401	0.0231442	0.0299177	0.00996791	0.0256509	0.0244007	2.57335	0.951261	1.36365	-0.0720868	0.00831205	0.784424	Not Detected	Not Detected	Not Detected	Not Detected	Not Detected	Not Detected	Not Detected	Not Detected	Not Detected	3	3	3	FALSE	A_30_P01019433	chr3:121997064-122031218_F										lincRNA:chr3:121997064-122031218 forward strand	chr3:122024583-122024642	mm|3qG1
554	A_30_P01019440	0.0255307	0.0896345	0.0309482	0.0888094	0.0374982	0.0500428	0.0192347	0.0457467	0.0569702	0.0487045	0.0587834	0.0406505	1.20694	0.69153	0.271356	-0.532136	0.578309	0.395002	Not Detected	Detected	Not Detected	Not Detected	Not Detected	Not Detected	Not Detected	Not Detected	Not Detected	2	3	3	FALSE	A_30_P01019440	chrX:120324027-120326909_R										lincRNA:chrX:120324027-120326909 reverse strand	chrX:120324210-120324151	mm|XqE3
555	A_30_P01019442	0.0336999	0.115142	0.176541	0.0190104	0.0250549	0.023838	0.0354501	0.0310155	0.0157946	0.108461	0.0226344	0.0274201	0.208688	1.21143	-2.26058	0.276714	0.106517	0.636587	Not Detected	Detected	Detected	Not Detected	Not Detected	Not Detected	Not Detected	Not Detected	Not Detected	1	3	3	FALSE	A_30_P01019442	chr5:14943275-14944205_F										lincRNA:chr5:14943275-14944205 forward strand	chr5:14944100-14944159	mm|5qA1
556	A_30_P01019443	0.801751	0.829671	0.702754	0.413148	0.34458	0.239619	0.345595	0.279533	0.323238	0.778058	0.332449	0.316122	0.42728	0.950889	-1.22675	-0.0726517	0.023658	0.876391	Detected	Detected	Detected	Detected	Detected	Detected	Detected	Detected	Detected	0	0	0	FALSE	A_30_P01019443	chr2:176264400-176302925_F										lincRNA:chr2:176264400-176302925 forward strand	chr2:176289231-176289290	mm|2qH4
557	A_30_P01019445	0.293567	0.183306	0.246588	0.260809	0.133268	0.0791232	0.246704	0.214793	0.198733	0.241154	0.157734	0.220077	0.654079	1.39524	-0.612464	0.480516	0.265154	0.323443	Detected	Detected	Detected	Detected	Not Detected	Not Detected	Detected	Detected	Detected	0	2	0	FALSE	A_30_P01019445	chr18:35967933-35986564_F										lincRNA:chr18:35967933-35986564 forward strand
558	A_30_P01019446	0.0894464	0.073892	0.0888029	0.159382	0.0309437	0.0360477	0.0434776	0.0509957	0.0468631	0.0840471	0.0754578	0.0471121	0.897804	0.624351	-0.155528	-0.679572	0.526587	0.765068	Detected	Detected	Detected	Detected	Not Detected	Not Detected	Not Detected	Not Detected	Not Detected	0	2	3	FALSE	A_30_P01019446	chr13:114282250-114308950_R										lincRNA:chr13:114282250-114308950 reverse strand	chr13:114303966-114303907	mm|13qD2.2
559	A_30_P01019455	1.8031	1.56645	1.36705	5.38682	4.55134	4.67833	3.95804	4.07227	5.69572	1.57887	4.87217	4.57534	3.08586	0.939078	1.62567	-0.0906826	0.000654162	0.605828	Detected	Detected	Detected	Detected	Detected	Detected	Detected	Detected	Detected	0	0	0	FALSE	A_30_P01019455	chr11:95573399-95587949_F										lincRNA:chr11:95573399-95587949 forward strand	chr11:95573953-95574012	mm|11qD
560	A_30_P01019456	0.0927187	0.0832871	0.101045	0.336872	0.264078	0.159492	0.207168	0.141486	0.180434	0.0923502	0.253481	0.176363	2.74478	0.695765	1.45669	-0.523329	0.0410692	0.275809	Detected	Detected	Detected	Detected	Detected	Detected	Detected	Detected	Detected	0	0	0	FALSE	A_30_P01019456	chr4:155560050-155570900_R										lincRNA:chr4:155560050-155570900 reverse strand	chr4:155569571-155569512	mm|4qE2
561	A_30_P01019457	0.0625511	0.0606283	0.0512631	0.0697255	0.0409818	0.0522624	0.0499352	0.0612373	0.109546	0.0581475	0.0543232	0.073573	0.934231	1.35436	-0.0981485	0.437607	0.636923	0.40033	Detected	Detected	Detected	Not Detected	Not Detected	Not Detected	Not Detected	Not Detected	Detected	0	3	2	FALSE	A_30_P01019457	chr15:73455424-73477275_R										lincRNA:chr15:73455424-73477275 reverse strand	chr15:73461307-73461248	mm|15qD3
562	A_30_P01019460	0.011381	0.00979709	0.00980543	0.0213131	0.0282054	0.0263338	0.0210468	0.0246823	0.0177358	0.0103278	0.0252841	0.0211549	2.44815	0.83669	1.29169	-0.257234	0.00203929	0.230512	Not Detected	Not Detected	Not Detected	Not Detected	Not Detected	Not Detected	Not Detected	Not Detected	Not Detected	3	3	3	FALSE	A_30_P01019460	chr10:119960546-119979696_R										lincRNA:chr10:119960546-119979696 reverse strand	chr10:119965624-119965565	mm|10qD2
563	A_30_P01019461	0.245437	0.25878	0.244858	0.461651	0.464814	0.378131	0.318684	0.430044	0.369371	0.249692	0.434866	0.372699	1.74161	0.857045	0.800421	-0.222557	0.0106537	0.229425	Detected	Detected	Detected	Detected	Detected	Detected	Detected	Detected	Detected	0	0	0	FALSE	A_30_P01019461	chr1:186560855-186563399_F										lincRNA:chr1:186560855-186563399 forward strand	chr1:186563196-186563255	mm|1qH5
564	A_30_P01019468	0.638264	0.535232	0.57413	1.00471	0.814376	0.763341	0.742143	0.920648	0.993947	0.582542	0.86081	0.885579	1.47768	1.02877	0.563334	0.0409265	0.0236453	0.828285	Detected	Detected	Detected	Detected	Detected	Detected	Detected	Detected	Detected	0	0	0	FALSE	A_30_P01019468	chr3:62727150-62758225_F										lincRNA:chr3:62727150-62758225 forward strand	chr3:62755889-62755948	mm|3qE1
565	A_30_P01019492	0.0101983	0.0178245	0.00875121	0.0625786	0.02449	0.0232011	0.0183411	0.0212592	0.102618	0.012258	0.0367566	0.047406	2.99857	1.28973	1.58428	0.367068	0.0643027	0.954462	Not Detected	Not Detected	Not Detected	Not Detected	Not Detected	Not Detected	Not Detected	Not Detected	Detected	3	3	2	FALSE	A_30_P01019492	chr9:57959595-57966629_R										lincRNA:chr9:57959595-57966629 reverse strand	chr9:57959655-57959596	mm|9qB
566	A_30_P01019493	0.072566	0.109436	0.0791044	0.0982272	0.0712884	0.0249005	0.0497649	0.0546605	0.0440843	0.0870354	0.0648054	0.0495032	0.744586	0.763876	-0.425489	-0.388591	0.413832	0.792927	Detected	Detected	Detected	Not Detected	Not Detected	Not Detected	Not Detected	Not Detected	Not Detected	0	3	3	FALSE	A_30_P01019493	chr1:75075500-75102200_R										lincRNA:chr1:75075500-75102200 reverse strand	chr1:75079392-75079333	mm|1qC3
567	A_30_P01019497	0.00967755	0.0083006	0.00839654	0.0180274	0.0239357	0.0227041	0.0180582	0.0208254	0.0151206	0.00879156	0.0215557	0.0180014	2.45186	0.835109	1.29388	-0.259964	0.00240241	0.227033	Not Detected	Not Detected	Not Detected	Not Detected	Not Detected	Not Detected	Not Detected	Not Detected	Not Detected	3	3	3	FALSE	A_30_P01019497	chr7:48853209-48886010_R										lincRNA:chr7:48853209-48886010 reverse strand	chr7:48880158-48880099	mm|7qB3
568	A_30_P01019501	0.108657	0.125338	0.150162	0.17715	0.236661	0.15032	0.360718	0.157171	0.170869	0.128053	0.188044	0.229586	1.46849	1.22092	0.554331	0.287967	0.0894099	0.661481	Detected	Detected	Detected	Detected	Detected	Detected	Detected	Detected	Detected	0	0	0	FALSE	A_30_P01019501	chr14:121850951-121854978_R										lincRNA:chr14:121850951-121854978 reverse strand	chr14:121851116-121851057	mm|14qE5
569	A_30_P01019502	0.0164298	0.0197853	0.0356558	0.0177655	0.0236817	0.0223984	0.0306998	0.0367753	0.0461749	0.023957	0.0212819	0.0378833	0.888338	1.78008	-0.17082	0.831939	0.802997	0.0208168	Not Detected	Not Detected	Not Detected	Not Detected	Not Detected	Not Detected	Not Detected	Not Detected	Not Detected	3	3	3	FALSE	A_30_P01019502	chr1:33893475-33903900_R										lincRNA:chr1:33893475-33903900 reverse strand	chr1:33896225-33896166	mm|1qB
570	A_30_P01019507	0.816753	0.315546	0.679116	0.437098	0.813733	0.72134	0.75972	1.35285	1.09714	0.603805	0.657391	1.0699	1.08875	1.6275	0.122668	0.702658	0.735349	0.125268	Detected	Detected	Detected	Detected	Detected	Detected	Detected	Detected	Detected	0	0	0	FALSE	A_30_P01019507	chr11:97457180-97487074_R										lincRNA:chr11:97457180-97487074 reverse strand	chr11:97484119-97484060	mm|11qD
571	A_30_P01019512	1.46798	1.27495	1.21957	3.29213	2.99777	2.96443	2.23919	2.71394	1.82786	1.32083	3.08478	2.26033	2.33548	0.732737	1.22372	-0.448633	0.000630941	0.0956128	Detected	Detected	Detected	Detected	Detected	Detected	Detected	Detected	Detected	0	0	0	FALSE	A_30_P01019512	chr4:141100989-141106639_R										lincRNA:chr4:141100989-141106639 reverse strand	chr4:141102357-141102298	mm|4qE1
572	A_30_P01019515	0.0490743	0.0291301	0.0261067	0.0376384	0.0761451	0.0910728	0.067472	0.0905886	0.0434784	0.0347704	0.0682854	0.0671797	1.9639	0.983807	0.973719	-0.023553	0.130093	0.986969	Not Detected	Not Detected	Not Detected	Not Detected	Not Detected	Not Detected	Not Detected	Not Detected	Not Detected	3	3	3	FALSE	A_30_P01019515	chr19:14911511-14911831_R										lincRNA:chr19:14911511-14911831 reverse strand	chr19:14911768-14911709	mm|19qA
573	A_30_P01019518	0.0123702	0.0104296	0.0104425	0.0226273	0.0302409	0.0283835	0.0223078	0.0259804	0.0195298	0.0110808	0.0270839	0.022606	2.44423	0.834665	1.28938	-0.26073	0.00205912	0.210238	Not Detected	Not Detected	Not Detected	Not Detected	Not Detected	Not Detected	Not Detected	Not Detected	Not Detected	3	3	3	FALSE	A_30_P01019518	chr12:52944867-52971992_F										lincRNA:chr12:52944867-52971992 forward strand	chr12:52966756-52966815	mm|12qC1
574	A_30_P01019527	0.00944133	0.00806341	0.0101026	0.0173618	0.02325	0.0220157	0.0175034	0.0232623	0.0147042	0.00920244	0.0208758	0.01849	2.26851	0.885712	1.18175	-0.175091	0.00252953	0.46544	Not Detected	Not Detected	Not Detected	Not Detected	Not Detected	Not Detected	Not Detected	Not Detected	Not Detected	3	3	3	FALSE	A_30_P01019527	chr13:28066579-28067179_F										lincRNA:chr13:28066579-28067179 forward strand	chr13:28067059-28067118	mm|13qA3.1
575	A_30_P01019531	0.0204428	0.00961485	0.0129732	0.0211137	0.0277125	0.0258835	0.0206167	0.0239106	0.0178414	0.0143436	0.0249032	0.0207896	1.73619	0.834816	0.795921	-0.26047	0.0998141	0.19823	Not Detected	Not Detected	Not Detected	Not Detected	Not Detected	Not Detected	Not Detected	Not Detected	Not Detected	3	3	3	FALSE	A_30_P01019531	chr8:34646787-34680312_R										lincRNA:chr8:34646787-34680312 reverse strand	chr8:34650197-34650138	mm|8qA4
576	A_30_P01019534	0.169979	0.141954	0.156367	0.171699	0.333346	0.186335	0.226529	0.270756	0.692814	0.1561	0.23046	0.3967	1.47636	1.72134	0.562042	0.783531	0.23516	0.331183	Detected	Detected	Detected	Detected	Detected	Detected	Detected	Detected	Detected	0	0	0	FALSE	A_30_P01019534	chr13:9818700-9824125_R										lincRNA:chr13:9818700-9824125 reverse strand	chr13:9819928-9819869	mm|13qA1
577	A_30_P01019536	0.0614609	0.148425	0.128746	0.153957	0.137296	0.116396	0.253965	0.100924	0.0680066	0.112877	0.135883	0.140965	1.20381	1.0374	0.267613	0.0529714	0.46641	0.798456	Detected	Detected	Detected	Detected	Not Detected	Not Detected	Detected	Not Detected	Not Detected	0	2	2	FALSE	A_30_P01019536	chr18:83530624-83534486_R										lincRNA:chr18:83530624-83534486 reverse strand	chr18:83530779-83530720	mm|18qE3
578	A_30_P01019540	0.0121166	0.0268895	0.0288592	0.0222572	0.0326573	0.027067	0.0216342	0.0251865	0.018596	0.0226218	0.0273272	0.0218056	1.208	0.797944	0.272625	-0.32564	0.479319	0.195885	Not Detected	Not Detected	Not Detected	Not Detected	Not Detected	Not Detected	Not Detected	Not Detected	Not Detected	3	3	3	FALSE	A_30_P01019540	chr4:124127144-124334840_R										lincRNA:chr4:124127144-124334840 reverse strand	chr4:124200367-124200308	mm|4qD2.2
579	A_30_P01019552	0.010802	0.00910701	0.00918617	0.0195906	0.025978	0.574276	0.0193154	0.0221665	0.0165499	0.00969838	0.206615	0.0193439	21.304	0.0936231	4.41305	-3.41699	0.216736	0.370416	Not Detected	Not Detected	Not Detected	Not Detected	Not Detected	Detected	Not Detected	Not Detected	Not Detected	3	2	3	FALSE	A_30_P01019552	chr15:36300306-36310544_R										lincRNA:chr15:36300306-36310544 reverse strand	chr15:36305157-36305098	mm|15qB3.1
580	A_30_P01019553	0.163228	0.172152	0.168558	0.245948	0.352727	0.328199	0.300916	0.359217	0.319947	0.167979	0.308958	0.326693	1.83926	1.0574	0.879125	0.0805262	0.0302533	0.633247	Detected	Detected	Detected	Detected	Detected	Detected	Detected	Detected	Detected	0	0	0	FALSE	A_30_P01019553	chr4:40720362-40729687_F										lincRNA:chr4:40720362-40729687 forward strand	chr4:40722510-40722569	mm|4qA5
581	A_30_P01019555	0.0120193	0.0101622	0.0103321	0.0436003	0.0290838	0.0273987	0.0359885	0.0376284	0.0221383	0.0108379	0.0333609	0.0319184	3.07818	0.956759	1.62208	-0.0637725	0.00986236	0.837234	Not Detected	Not Detected	Not Detected	Not Detected	Not Detected	Not Detected	Not Detected	Not Detected	Not Detected	3	3	3	FALSE	A_30_P01019555	chr17:27703181-27716306_F										lincRNA:chr17:27703181-27716306 forward strand	chr17:27715570-27715629	mm|17qA3.3
582	A_30_P01019560	0.530614	0.554427	0.629005	0.877669	1.63716	0.878697	1.07054	1.09684	0.781313	0.571348	1.13117	0.982898	1.97983	0.868919	0.985378	-0.202706	0.0834551	0.680573	Detected	Detected	Detected	Detected	Detected	Detected	Detected	Detected	Detected	0	0	0	FALSE	A_30_P01019560	chr1:42689799-42749799_F										lincRNA:chr1:42689799-42749799 forward strand	chr1:42749189-42749248	mm|1qB
583	A_30_P01019565	11.7185	9.66322	9.50266	33.235	30.726	28.0603	23.3905	26.4554	27.7493	10.2948	30.6738	25.8651	2.97955	0.84323	1.57509	-0.246002	0.000328814	0.0730092	Detected	Detected	Detected	Detected	Detected	Detected	Detected	Detected	Detected	0	0	0	FALSE	A_30_P01019565	chr16:29942664-29948289_R										lincRNA:chr16:29942664-29948289 reverse strand	chr16:29946676-29946617	mm|16qB2
584	A_30_P01019572	0.0197838	0.00906041	0.00917433	0.0537481	0.0259277	0.0245018	0.0194979	0.0407791	0.016497	0.0126728	0.0347259	0.0255913	2.74018	0.736952	1.45427	-0.440356	0.0489933	0.444387	Not Detected	Not Detected	Not Detected	Not Detected	Not Detected	Not Detected	Not Detected	Not Detected	Not Detected	3	3	3	FALSE	A_30_P01019572	chr15:79276925-79286500_F										lincRNA:chr15:79276925-79286500 forward strand	chr15:79285923-79285982	mm|15qE1
585	A_30_P01019577	0.0106771	0.0090365	0.00916024	0.019826	0.0262516	0.0245586	0.0195429	0.0227572	0.0169128	0.00962462	0.0235454	0.0197376	2.44637	0.83828	1.29065	-0.254496	0.00185763	0.216275	Not Detected	Not Detected	Not Detected	Not Detected	Not Detected	Not Detected	Not Detected	Not Detected	Not Detected	3	3	3	FALSE	A_30_P01019577	chr13:65716675-65765575_F										lincRNA:chr13:65716675-65765575 forward strand	chr13:65750524-65750583	mm|13qB3
586	A_30_P01019580	0.0122853	0.0105079	0.0106183	0.0229848	0.030712	0.0290434	0.023223	0.0260835	0.0194737	0.0111372	0.0275801	0.0229267	2.4764	0.831278	1.30824	-0.266597	0.00246074	0.208233	Not Detected	Not Detected	Not Detected	Not Detected	Not Detected	Not Detected	Not Detected	Not Detected	Not Detected	3	3	3	FALSE	A_30_P01019580	chr7:88131123-88136898_F										lincRNA:chr7:88131123-88136898 forward strand	chr7:88134270-88134329	mm|7qD3
587	A_30_P01019583	0.20176	0.163607	0.154196	0.0453384	0.077466	0.0476532	0.0704142	0.0648987	0.0798213	0.173187	0.0568192	0.0717114	0.328079	1.2621	-1.60788	0.335824	0.0104894	0.264524	Detected	Detected	Detected	Not Detected	Not Detected	Not Detected	Not Detected	Not Detected	Not Detected	0	3	3	FALSE	A_30_P01019583	chr5:23195569-23218551_R										lincRNA:chr5:23195569-23218551 reverse strand	chr5:23204806-23204747	mm|5qA3
588	A_30_P01019590	0.0109768	0.0234755	0.0110325	0.0220094	0.0262808	0.0244974	0.0438195	0.0507044	0.0309183	0.0151616	0.0242626	0.041814	1.60026	1.7234	0.67831	0.785255	0.163507	0.0567735	Not Detected	Not Detected	Not Detected	Not Detected	Not Detected	Not Detected	Not Detected	Not Detected	Not Detected	3	3	3	FALSE	A_30_P01019590	chr12:3173375-3203075_R										lincRNA:chr12:3173375-3203075 reverse strand	chr12:3193340-3193281	mm|12qA1.1
589	A_30_P01019592	0.0141574	0.0154045	0.0174569	0.0273917	0.0246991	0.0242817	0.0373155	0.0211928	0.0357711	0.015673	0.0254575	0.0314265	1.6243	1.23447	0.699816	0.303889	0.00457797	0.425369	Not Detected	Not Detected	Not Detected	Not Detected	Not Detected	Not Detected	Not Detected	Not Detected	Not Detected	3	3	3	FALSE	A_30_P01019592	chr18:77291264-77299664_F										lincRNA:chr18:77291264-77299664 forward strand	chr18:77296712-77296771	mm|18qE3
590	A_30_P01019598	0.438881	0.435079	0.442141	0.258084	0.0667844	0.0921972	0.10197	0.0993311	0.129602	0.4387	0.139022	0.110301	0.316894	0.793407	-1.65793	-0.333867	0.0830945	0.891451	Detected	Detected	Detected	Detected	Not Detected	Not Detected	Not Detected	Not Detected	Detected	0	2	2	FALSE	A_30_P01019598	chr14:105508625-105513462_R										lincRNA:chr14:105508625-105513462 reverse strand	chr14:105508888-105508829	mm|14qE2.3
591	A_30_P01019606	10.0461	9.62446	10.1602	10.5275	16.4597	13.4924	17.8479	21.5498	16.7693	9.94359	13.4932	18.7224	1.35697	1.38754	0.440392	0.472531	0.152835	0.102853	Detected	Detected	Detected	Detected	Detected	Detected	Detected	Detected	Detected	0	0	0	FALSE	A_30_P01019606	chr1:95871175-95886625_F										lincRNA:chr1:95871175-95886625 forward strand	chr1:95883765-95883824	mm|1qD
592	A_30_P01019607	0.186492	0.192563	0.189702	0.176346	0.279849	0.247487	0.305978	0.294054	0.245621	0.189585	0.234561	0.281884	1.23723	1.20175	0.307113	0.265143	0.293906	0.291407	Detected	Detected	Detected	Detected	Detected	Detected	Detected	Detected	Detected	0	0	0	FALSE	A_30_P01019607	chr2:31001736-31006911_F										lincRNA:chr2:31001736-31006911 forward strand	chr2:31002432-31002491	mm|2qB
593	A_30_P01019612	0.0301175	0.0372394	0.0613017	0.0697679	0.0799163	0.0639604	0.117795	0.0584466	0.0197201	0.0428862	0.0712149	0.0653204	1.66055	0.91723	0.731665	-0.124645	0.110697	0.59989	Not Detected	Not Detected	Detected	Not Detected	Not Detected	Not Detected	Not Detected	Not Detected	Not Detected	2	3	3	FALSE	A_30_P01019612	chr6:86776350-86799450_F										lincRNA:chr6:86776350-86799450 forward strand	chr6:86799222-86799281	mm|6qD1
594	A_30_P01019616	0.548437	0.540809	0.514922	0.607706	0.307476	0.738761	0.254496	0.224358	0.267632	0.534723	0.551314	0.248829	1.03103	0.451337	0.044084	-1.14772	0.910801	0.104806	Detected	Detected	Detected	Detected	Detected	Detected	Detected	Detected	Detected	0	0	0	FALSE	A_30_P01019616	chr10:126831225-126832253_F										lincRNA:chr10:126831225-126832253 forward strand	chr10:126831827-126831886	mm|10qD3
595	A_30_P01019625	0.0103165	0.0096192	0.0124377	0.018769	0.0248174	0.0235418	0.0185748	0.0215928	0.0161713	0.0107911	0.0223761	0.0187796	2.07356	0.839272	1.05211	-0.252789	0.00331806	0.217296	Not Detected	Not Detected	Not Detected	Not Detected	Not Detected	Not Detected	Not Detected	Not Detected	Not Detected	3	3	3	FALSE	A_30_P01019625	chr9:58301467-58323783_R										lincRNA:chr9:58301467-58323783 reverse strand	chr9:58304790-58304731	mm|9qB
596	A_30_P01019627	0.0920932	0.141152	0.132404	0.0226578	0.0427703	0.0544054	0.0808665	0.0491142	0.0637096	0.121883	0.0399445	0.0645635	0.327728	1.61633	-1.60943	0.692722	0.0292139	0.174664	Detected	Detected	Detected	Not Detected	Not Detected	Not Detected	Not Detected	Not Detected	Not Detected	0	3	3	FALSE	A_30_P01019627	chrX:20389063-20389702_F										lincRNA:chrX:20389063-20389702 forward strand	chrX:20389535-20389594	mm|XqA1.3
597	A_30_P01019632	0.364227	0.307679	0.319343	0.868802	0.792551	0.707518	0.634408	0.609267	0.575959	0.330416	0.789624	0.606545	2.38978	0.768144	1.25688	-0.380551	0.000420595	0.031305	Detected	Detected	Detected	Detected	Detected	Detected	Detected	Detected	Detected	0	0	0	FALSE	A_30_P01019632	chr3:85589154-85621215_R										lincRNA:chr3:85589154-85621215 reverse strand	chr3:85621213-85621154	mm|3qF1
598	A_30_P01019633	0.0954458	0.0940276	0.0954256	0.247156	0.143689	0.0805739	0.144781	0.134894	0.162956	0.0949663	0.15714	0.147544	1.65469	0.938932	0.726561	-0.090908	0.339944	0.923388	Detected	Detected	Detected	Detected	Not Detected	Not Detected	Detected	Not Detected	Detected	0	2	1	FALSE	A_30_P01019633	chr18:35977112-35977538_F										lincRNA:chr18:35977112-35977538 forward strand	chr18:35977477-35977536	mm|18qB2
599	A_30_P01019634	0.0769138	0.0723276	0.0670508	0.16617	0.0692159	0.111034	0.0819439	0.113481	0.0957936	0.0720974	0.115473	0.097073	1.60163	0.840651	0.679543	-0.25042	0.244676	0.691594	Detected	Detected	Detected	Detected	Not Detected	Not Detected	Not Detected	Not Detected	Detected	0	2	2	FALSE	A_30_P01019634	chr1:138567345-138578139_F										lincRNA:chr1:138567345-138578139 forward strand	chr1:138571774-138571833	mm|1qE4
600	A_30_P01019645	1.51664	1.51583	1.54864	3.7714	3.636	3.38031	3.01451	3.56587	2.56922	1.52703	3.5959	3.04987	2.35483	0.84815	1.23562	-0.237608	0.000903006	0.202497	Detected	Detected	Detected	Detected	Detected	Detected	Detected	Detected	Detected	0	0	0	FALSE	A_30_P01019645	chr14:21029450-21049451_F										lincRNA:chr14:21029450-21049451 forward strand	chr14:21040324-21040383	mm|14qA3
601	A_30_P01019646	6.49566	7.08679	6.46823	4.57578	10.0161	9.14769	9.57492	11.9072	10.9044	6.68356	7.91318	10.7955	1.18398	1.36425	0.243641	0.448103	0.69094	0.278149	Detected	Detected	Detected	Detected	Detected	Detected	Detected	Detected	Detected	0	0	0	FALSE	A_30_P01019646	chr13:58474388-58487288_R										lincRNA:chr13:58474388-58487288 reverse strand	chr13:58483829-58483770	mm|13qB1
602	A_30_P01019649	0.0720432	0.0826109	0.109481	0.479225	0.110139	0.30617	0.311608	0.275992	0.227346	0.0880451	0.298511	0.271648	3.39043	0.910011	1.76147	-0.136045	0.12415	0.89857	Detected	Detected	Detected	Detected	Not Detected	Detected	Detected	Detected	Detected	0	1	0	FALSE	A_30_P01019649	chr5:14923900-15062725_F										lincRNA:chr5:14923900-15062725 forward strand	chr5:14948302-14948361	mm|5qA1
603	A_30_P01019652	0.0428368	0.0401261	0.028115	0.0530694	0.0669569	0.0634306	0.0189777	0.0548775	0.0215272	0.037026	0.0611523	0.0317941	1.65161	0.519917	0.723869	-0.943646	0.0394277	0.143258	Not Detected	Not Detected	Not Detected	Not Detected	Not Detected	Not Detected	Not Detected	Not Detected	Not Detected	3	3	3	FALSE	A_30_P01019652	chr1:92412246-92423471_F										lincRNA:chr1:92412246-92423471 forward strand	chr1:92419303-92419362	mm|1qD
604	A_30_P01019655	0.0417885	0.0222884	0.0345751	0.0632605	0.0925311	0.0283352	0.0510916	0.0659896	0.0493746	0.032884	0.0613756	0.0554852	1.86643	0.904028	0.900278	-0.145561	0.259448	0.997587	Not Detected	Not Detected	Not Detected	Not Detected	Not Detected	Not Detected	Not Detected	Not Detected	Not Detected	3	3	3	FALSE	A_30_P01019655	chr19:16090063-16103160_R										lincRNA:chr19:16090063-16103160 reverse strand	chr19:16090287-16090228	mm|19qA
605	A_30_P01019656	0.0123741	0.0104388	0.0104478	0.0226258	0.0302416	0.0284109	0.022325	0.0259893	0.0195302	0.0110869	0.0270927	0.0226148	2.44367	0.83472	1.28905	-0.260636	0.00208175	0.210852	Not Detected	Not Detected	Not Detected	Not Detected	Not Detected	Not Detected	Not Detected	Not Detected	Not Detected	3	3	3	FALSE	A_30_P01019656	chr1:185808525-185826139_F										lincRNA:chr1:185808525-185826139 forward strand	chr1:185826080-185826139	mm|1qH5
606	A_30_P01019659	0.0613552	0.0610901	0.0557211	0.0544825	0.0824203	0.0252645	0.0664425	0.0311161	0.0636647	0.0593888	0.0540558	0.0537411	0.910202	0.994178	-0.135742	-0.00842326	0.617009	0.913404	Detected	Detected	Detected	Not Detected	Not Detected	Not Detected	Not Detected	Not Detected	Not Detected	0	3	3	FALSE	A_30_P01019659	chr4:40840725-40860875_F										lincRNA:chr4:40840725-40860875 forward strand	chr4:40859202-40859261	mm|4qA5
607	A_30_P01019666	0.194942	0.166931	0.196582	0.536386	0.445547	0.620981	0.435494	0.535025	0.249384	0.186152	0.534305	0.406634	2.87026	0.761053	1.52118	-0.393931	0.00207068	0.304948	Detected	Detected	Detected	Detected	Detected	Detected	Detected	Detected	Detected	0	0	0	FALSE	A_30_P01019666	chr7:134620707-134626739_F										lincRNA:chr7:134620707-134626739 forward strand	chr7:134621608-134621667	mm|7qF3
608	A_30_P01019669	0.00991222	0.00842976	0.0085374	0.0183375	0.0244198	0.0229911	0.0182695	0.021288	0.0157636	0.0089598	0.0219161	0.0184403	2.44605	0.841405	1.29045	-0.249127	0.00223868	0.232723	Not Detected	Not Detected	Not Detected	Not Detected	Not Detected	Not Detected	Not Detected	Not Detected	Not Detected	3	3	3	FALSE	A_30_P01019669	chrX:120324027-120326909_R										lincRNA:chrX:120324027-120326909 reverse strand	chrX:120324397-120324338	mm|XqE3
609	A_30_P01019671	0.0112522	0.0181128	0.00963184	0.0206726	0.0274894	0.0256695	0.0202536	0.0687171	0.0179396	0.012999	0.0246105	0.0356368	1.89327	1.44803	0.920879	0.534093	0.0544382	0.719195	Not Detected	Not Detected	Not Detected	Not Detected	Not Detected	Not Detected	Not Detected	Not Detected	Not Detected	3	3	3	FALSE	A_30_P01019671	chr9:58301467-58323783_R										lincRNA:chr9:58301467-58323783 reverse strand	chr9:58303855-58303796	mm|9qB
610	A_30_P01019674	0.010189	0.00873484	0.00877326	0.0185546	0.0245628	0.0233105	0.0183868	0.0214304	0.0160434	0.00923236	0.0221426	0.0186202	2.39837	0.840922	1.26205	-0.249955	0.00236641	0.222951	Not Detected	Not Detected	Not Detected	Not Detected	Not Detected	Not Detected	Not Detected	Not Detected	Not Detected	3	3	3	FALSE	A_30_P01019674	chr7:57115122-57121735_R										lincRNA:chr7:57115122-57121735 reverse strand	chr7:57116446-57116387	mm|7qB5
611	A_30_P01019676	0.0201269	0.0102912	0.0104619	0.0224748	0.0298896	0.0278992	0.0221243	0.0253274	0.0185505	0.0136267	0.0267545	0.0220008	1.9634	0.822319	0.973352	-0.282231	0.0677327	0.189876	Not Detected	Not Detected	Not Detected	Not Detected	Not Detected	Not Detected	Not Detected	Not Detected	Not Detected	3	3	3	FALSE	A_30_P01019676	chrX:123306246-123307974_F										lincRNA:chrX:123306246-123307974 forward strand	chrX:123306595-123306654	mm|XqE3
612	A_30_P01019681	0.0484076	0.0415773	0.0437173	0.073833	0.072385	0.0568329	0.0873518	0.078263	0.0657644	0.0445674	0.0676837	0.0771264	1.51868	1.13951	0.602818	0.188417	0.0219331	0.329802	Not Detected	Not Detected	Not Detected	Not Detected	Not Detected	Not Detected	Not Detected	Not Detected	Not Detected	3	3	3	FALSE	A_30_P01019681	chr13:98513868-98517366_R										lincRNA:chr13:98513868-98517366 reverse strand	chr13:98514146-98514087	mm|13qD1
613	A_30_P01019685	0.0245876	0.0287889	0.0274433	0.0706762	1.19595	0.233349	0.0211108	0.036534	0.0282513	0.0269399	0.499992	0.028632	18.5595	0.057265	4.21409	-4.1262	0.105965	0.104534	Not Detected	Not Detected	Not Detected	Not Detected	Detected	Detected	Not Detected	Not Detected	Not Detected	3	1	3	FALSE	A_30_P01019685	chr17:21177225-21187525_R										lincRNA:chr17:21177225-21187525 reverse strand	chr17:21178445-21178386	mm|17qA3.2
614	A_30_P01019689	0.0257196	0.0316219	0.0281978	0.0429797	0.0310633	0.0289106	0.0278077	0.0263767	0.0193956	0.0285131	0.0343179	0.0245267	1.20358	0.714691	0.267336	-0.484609	0.293842	0.115739	Not Detected	Not Detected	Not Detected	Not Detected	Not Detected	Not Detected	Not Detected	Not Detected	Not Detected	3	3	3	FALSE	A_30_P01019689	chr2:60531602-60543635_R										lincRNA:chr2:60531602-60543635 reverse strand	chr2:60543613-60543554	mm|2qC1.2
615	A_30_P01019691	0.0827972	0.0982603	0.0884245	0.136887	0.0793567	0.0778984	0.062521	0.11845	0.0669472	0.0898273	0.0980474	0.0826393	1.09151	0.84285	0.126325	-0.246651	0.801036	0.551546	Detected	Detected	Detected	Detected	Not Detected	Not Detected	Not Detected	Detected	Not Detected	0	2	2	FALSE	A_30_P01019691	chr12:3199327-3200827_F										lincRNA:chr12:3199327-3200827 forward strand	chr12:3200642-3200701	mm|12qA1.1
616	A_30_P01019693	0.00954671	0.00817357	0.0547146	0.0177496	0.0236262	0.0223778	0.01781	0.0205757	0.014992	0.024145	0.0212512	0.0177926	0.88015	0.83725	-0.184178	-0.25627	0.709916	0.232001	Not Detected	Not Detected	Detected	Not Detected	Not Detected	Not Detected	Not Detected	Not Detected	Not Detected	2	3	3	FALSE	A_30_P01019693	chr14:72400656-72400887_F										lincRNA:chr14:72400656-72400887 forward strand	chr14:72400768-72400827	mm|14qD2
617	A_30_P01019695	1.1716	1.17748	1.11629	2.59113	1.38725	1.23103	1.28607	1.73551	1.54193	1.15512	1.73647	1.52117	1.50328	0.876012	0.588113	-0.190977	0.266463	0.760043	Detected	Detected	Detected	Detected	Detected	Detected	Detected	Detected	Detected	0	0	0	FALSE	A_30_P01019695	chr8:129102060-129109035_R										lincRNA:chr8:129102060-129109035 reverse strand	chr8:129106723-129106664	mm|8qE2
618	A_30_P01019696	0.0560406	0.0908657	0.0399318	0.0357402	0.0972233	0.0463797	0.0326165	0.0701247	0.145296	0.0622794	0.0597811	0.082679	0.959886	1.38303	-0.0590657	0.467832	0.850035	0.672602	Not Detected	Detected	Not Detected	Not Detected	Not Detected	Not Detected	Not Detected	Not Detected	Detected	2	3	2	FALSE	A_30_P01019696	chr5:74340084-74346709_F										lincRNA:chr5:74340084-74346709 forward strand	chr5:74342324-74342383	mm|5qC3.3
619	A_30_P01019700	0.101806	0.100205	0.174071	0.269552	0.186786	0.174523	0.186792	0.110113	0.213059	0.125361	0.210287	0.169988	1.67745	0.808361	0.746272	-0.306929	0.0833637	0.400698	Detected	Detected	Detected	Detected	Detected	Detected	Detected	Not Detected	Detected	0	0	1	FALSE	A_30_P01019700	chr18:3003075-3016150_F										lincRNA:chr18:3003075-3016150 forward strand	chr18:3005674-3005733	mm|18qA1
620	A_30_P01019704	0.0116253	0.00985271	0.0100178	0.0214185	0.0282558	0.0265353	0.0211016	0.024179	0.0222022	0.0104986	0.0254032	0.0224942	2.41967	0.885489	1.27481	-0.175453	0.00189417	0.302804	Not Detected	Not Detected	Not Detected	Not Detected	Not Detected	Not Detected	Not Detected	Not Detected	Not Detected	3	3	3	FALSE	A_30_P01019704	chr14:105987405-106063477_F										lincRNA:chr14:105987405-106063477 forward strand	chr14:106020807-106020866	mm|14qE2.3
621	A_30_P01019708	0.0979015	0.0988016	0.100337	0.0649344	0.061319	0.119118	0.022232	0.128188	0.102557	0.0990134	0.0817904	0.0843255	0.826053	1.031	-0.275693	0.0440389	0.37795	0.804881	Detected	Detected	Detected	Not Detected	Not Detected	Not Detected	Not Detected	Not Detected	Detected	0	3	2	FALSE	A_30_P01019708	chrX:20555593-20591971_F										lincRNA:chrX:20555593-20591971 forward strand	chrX:20563200-20563259	mm|XqA1.3
622	A_30_P01019709	0.0541951	0.0862059	0.0612012	0.0380051	0.0286804	0.0412199	0.0313823	0.269001	0.0401588	0.0672007	0.0359685	0.113514	0.53524	3.15593	-0.901743	1.65807	0.0275058	0.426127	Not Detected	Detected	Detected	Not Detected	Not Detected	Not Detected	Not Detected	Detected	Not Detected	1	3	2	FALSE	A_30_P01019709	chr5:149765314-149771786_R										lincRNA:chr5:149765314-149771786 reverse strand	chr5:149766058-149765999	mm|5qG3
623	A_30_P01019715	0.0293855	0.0256402	0.0610687	0.104323	0.0512533	0.0248155	0.0572651	0.0516318	0.0321398	0.0386981	0.0601306	0.0470123	1.55384	0.781835	0.635836	-0.355063	0.520715	0.822629	Not Detected	Not Detected	Detected	Detected	Not Detected	Not Detected	Not Detected	Not Detected	Not Detected	2	2	3	FALSE	A_30_P01019715	chr15:10697243-10699102_F										lincRNA:chr15:10697243-10699102 forward strand	chr15:10699043-10699102	mm|15qA1
624	A_30_P01019723	0.0113344	0.00953467	0.00966747	0.0207067	0.0276091	0.0256935	0.0204721	0.0234515	0.0173138	0.0101788	0.0246698	0.0204124	2.42363	0.827428	1.27717	-0.273294	0.00200891	0.198246	Not Detected	Not Detected	Not Detected	Not Detected	Not Detected	Not Detected	Not Detected	Not Detected	Not Detected	3	3	3	FALSE	A_30_P01019723	chr7:26202452-26224557_F										lincRNA:chr7:26202452-26224557 forward strand	chr7:26224376-26224435	mm|7qA3
625	A_30_P01019724	0.0207446	0.00957801	0.0193877	0.0207399	0.0723711	0.0255652	0.0203981	0.0233971	0.0398289	0.0165701	0.0395587	0.0278747	2.38735	0.704641	1.25541	-0.50504	0.182586	0.628899	Not Detected	Not Detected	Not Detected	Not Detected	Not Detected	Not Detected	Not Detected	Not Detected	Not Detected	3	3	3	FALSE	A_30_P01019724	chr4:89032648-89133273_R										lincRNA:chr4:89032648-89133273 reverse strand	chr4:89109546-89109487	mm|4qC4
626	A_30_P01019725	0.0617621	0.0887659	0.080785	0.0255112	0.0311047	0.0291317	0.0652067	0.0262891	0.0627724	0.0771044	0.0285826	0.0514228	0.3707	1.79909	-1.43168	0.847271	0.00380162	0.223057	Not Detected	Detected	Detected	Not Detected	Not Detected	Not Detected	Not Detected	Not Detected	Not Detected	1	3	3	FALSE	A_30_P01019725	chr1:141070245-141076841_R										lincRNA:chr1:141070245-141076841 reverse strand	chr1:141072126-141072067	mm|1qF
627	A_30_P01019726	0.370219	0.301006	0.333908	0.0626497	0.025646	0.0241003	0.025896	0.0223659	0.0331465	0.335044	0.0374653	0.0271361	0.111822	0.724299	-3.16072	-0.465342	0.0150037	0.537068	Detected	Detected	Detected	Not Detected	Not Detected	Not Detected	Not Detected	Not Detected	Not Detected	0	3	3	FALSE	A_30_P01019726	chr16:64820905-64822069_R										lincRNA:chr16:64820905-64822069 reverse strand	chr16:64821020-64820961	mm|16qC1.3
628	A_30_P01019730	4.12455	3.88091	3.79359	5.16699	5.79867	6.37665	6.10637	5.40513	5.52647	3.93302	5.78077	5.67932	1.46981	0.982451	0.555625	-0.0255426	0.0140936	0.841463	Detected	Detected	Detected	Detected	Detected	Detected	Detected	Detected	Detected	0	0	0	FALSE	A_30_P01019730	chr4:13369325-13456750_F										lincRNA:chr4:13369325-13456750 forward strand	chr4:13410286-13410345	mm|4qA1
629	A_30_P01019731	0.0267385	0.0120028	0.012615	0.0215882	0.0282828	0.0264203	0.0514446	0.0243513	0.018254	0.0171188	0.0254304	0.03135	1.48553	1.23277	0.570977	0.301909	0.211035	0.746723	Not Detected	Not Detected	Not Detected	Not Detected	Not Detected	Not Detected	Not Detected	Not Detected	Not Detected	3	3	3	FALSE	A_30_P01019731	chr3:30032959-30079659_F										lincRNA:chr3:30032959-30079659 forward strand	chr3:30049010-30049069	mm|3qA3
630	A_30_P01019732	0.0111435	0.00939086	0.00945414	0.0201683	0.0265939	0.0247633	0.56156	0.0226754	0.0170227	0.00999615	0.0238419	0.200419	2.3851	8.4062	1.25405	3.07145	0.00172875	0.493787	Not Detected	Not Detected	Not Detected	Not Detected	Not Detected	Not Detected	Detected	Not Detected	Not Detected	3	3	2	FALSE	A_30_P01019732	chr7:71221826-71222801_R										lincRNA:chr7:71221826-71222801 reverse strand	chr7:71222603-71222544	mm|7qC
631	A_30_P01019738	0.0105938	0.0184838	0.0153426	0.104576	0.0413802	0.0297342	0.0307064	0.0223547	0.0195489	0.0148067	0.0585635	0.0242033	3.9552	0.413284	1.98375	-1.27479	0.0625826	0.173948	Not Detected	Not Detected	Not Detected	Detected	Not Detected	Not Detected	Not Detected	Not Detected	Not Detected	3	2	3	FALSE	A_30_P01019738	chr11:22992716-23024484_R										lincRNA:chr11:22992716-23024484 reverse strand	chr11:23024421-23024362	mm|11qA3.2
632	A_30_P01019745	0.0121988	0.0102841	0.0104034	0.0224031	0.0295841	0.0276878	0.0219123	0.0254489	0.0191949	0.0109621	0.0265583	0.0221853	2.42274	0.835345	1.27664	-0.259557	0.001756	0.19916	Not Detected	Not Detected	Not Detected	Not Detected	Not Detected	Not Detected	Not Detected	Not Detected	Not Detected	3	3	3	FALSE	A_30_P01019745	chr12:33611742-33638648_R										lincRNA:chr12:33611742-33638648 reverse strand	chr12:33627207-33627148	mm|12qA3
633	A_30_P01019746	0.0310036	0.0223106	0.0110187	0.0237793	0.0407548	0.0384057	0.0239022	0.0382186	0.0199101	0.0214443	0.0343133	0.0273437	1.60011	0.796883	0.678172	-0.32756	0.223781	0.408833	Not Detected	Not Detected	Not Detected	Not Detected	Not Detected	Not Detected	Not Detected	Not Detected	Not Detected	3	3	3	FALSE	A_30_P01019746	chr12:111617728-111665403_R										lincRNA:chr12:111617728-111665403 reverse strand	chr12:111621845-111621786	mm|12qF1
634	A_30_P01019747	0.0264389	0.0279321	0.015033	0.0690533	0.0321699	0.0449697	0.0384585	0.0498834	0.0444069	0.0231347	0.048731	0.0442496	2.1064	0.908038	1.07478	-0.139175	0.0698665	0.837738	Not Detected	Not Detected	Not Detected	Not Detected	Not Detected	Not Detected	Not Detected	Not Detected	Not Detected	3	3	3	FALSE	A_30_P01019747	chr19:4209657-4210475_R										lincRNA:chr19:4209657-4210475 reverse strand	chr19:4209944-4209885	mm|19qA
635	A_30_P01019754	0.00990874	0.00841912	0.0177306	0.0295363	0.0242891	0.0246285	0.0181992	0.0208776	0.015305	0.0120195	0.0261513	0.0181273	2.17574	0.693169	1.12151	-0.528721	0.0582223	0.0330039	Not Detected	Not Detected	Not Detected	Not Detected	Not Detected	Not Detected	Not Detected	Not Detected	Not Detected	3	3	3	FALSE	A_30_P01019754	chr3:75451370-75459674_R										lincRNA:chr3:75451370-75459674 reverse strand	chr3:75452155-75452096	mm|3qE3
636	A_30_P01019757	0.247953	0.221556	0.27836	0.147573	0.159839	0.161732	0.204598	0.0871476	0.146425	0.24929	0.156381	0.146057	0.627308	0.93398	-0.672753	-0.0985371	0.00999528	0.662071	Detected	Detected	Detected	Detected	Detected	Detected	Detected	Not Detected	Detected	0	0	1	FALSE	A_30_P01019757	chr7:26227170-26234328_R										lincRNA:chr7:26227170-26234328 reverse strand	chr7:26227571-26227512	mm|7qA3
637	A_30_P01019758	0.443095	0.415098	0.441388	0.551479	0.391616	0.329212	0.372354	0.48741	0.436099	0.433194	0.424102	0.431954	0.979013	1.01851	-0.0305994	0.0264658	0.798936	0.847416	Detected	Detected	Detected	Detected	Detected	Detected	Detected	Detected	Detected	0	0	0	FALSE	A_30_P01019758	chr15:83266264-83294664_R										lincRNA:chr15:83266264-83294664 reverse strand	chr15:83280594-83280535	mm|15qE1
638	A_30_P01019763	0.0113541	0.00969644	0.00963786	0.0207402	0.0273188	0.0255166	0.020267	0.0233264	0.0174344	0.0102295	0.0245252	0.0203426	2.3975	0.829458	1.26153	-0.269758	0.00179203	0.187678	Not Detected	Not Detected	Not Detected	Not Detected	Not Detected	Not Detected	Not Detected	Not Detected	Not Detected	3	3	3	FALSE	A_30_P01019763	chr16:92180800-92196850_F										lincRNA:chr16:92180800-92196850 forward strand	chr16:92189362-92189421	mm|16qC4
639	A_30_P01019769	0.0909124	0.0815215	0.0918376	0.144539	0.133994	0.121954	0.135823	0.127144	0.131076	0.0880905	0.133495	0.131347	1.51543	0.983909	0.599732	-0.0234025	0.00324448	0.807929	Detected	Detected	Detected	Detected	Detected	Detected	Detected	Detected	Detected	0	0	0	FALSE	A_30_P01019769	chr5:144517700-144526071_R										lincRNA:chr5:144517700-144526071 reverse strand	chr5:144525595-144525536	mm|5qG2
640	A_30_P01019772	0.505395	0.569498	0.516804	0.467986	0.825829	0.630369	0.677463	0.824207	0.813038	0.530565	0.641394	0.771569	1.20889	1.20296	0.273681	0.266584	0.422884	0.335143	Detected	Detected	Detected	Detected	Detected	Detected	Detected	Detected	Detected	0	0	0	FALSE	A_30_P01019772	chr6:135294099-135300310_R										lincRNA:chr6:135294099-135300310 reverse strand	chr6:135299812-135299753	mm|6qG1
641	A_30_P01019779	1.33075	1.19179	1.08327	1.00147	0.530012	0.725476	0.64097	0.558166	0.624981	1.20194	0.752319	0.608039	0.625923	0.808219	-0.675943	-0.307181	0.101743	0.42945	Detected	Detected	Detected	Detected	Detected	Detected	Detected	Detected	Detected	0	0	0	FALSE	A_30_P01019779	chr12:45418006-45418737_F										lincRNA:chr12:45418006-45418737 forward strand	chr12:45418678-45418737	mm|12qB3
642	A_30_P01019781	0.0605829	0.0561183	0.0710611	0.0897019	0.134814	0.113617	0.113512	0.0798546	0.170985	0.0625874	0.112711	0.12145	1.80085	1.07754	0.848681	0.107742	0.0207765	0.882251	Detected	Detected	Detected	Not Detected	Detected	Not Detected	Detected	Not Detected	Detected	0	2	1	FALSE	A_30_P01019781	chr3:96104418-96141693_R										lincRNA:chr3:96104418-96141693 reverse strand	chr3:96134724-96134665	mm|3qF2.1
643	A_30_P01019782	0.0130972	0.011114	0.0111519	0.0237004	0.032232	0.0299892	0.0232874	0.0271604	0.0203409	0.0117877	0.0286405	0.0235963	2.4297	0.823877	1.28078	-0.279499	0.00289504	0.199146	Not Detected	Not Detected	Not Detected	Not Detected	Not Detected	Not Detected	Not Detected	Not Detected	Not Detected	3	3	3	FALSE	A_30_P01019782	chr1:87343550-87362900_F										lincRNA:chr1:87343550-87362900 forward strand	chr1:87354366-87354425	mm|1qC5
644	A_30_P01019792	0.0152232	0.0103091	0.010325	0.0221621	0.0294086	0.0272695	0.0217902	0.0250124	0.0185851	0.0119524	0.0262801	0.0217959	2.19872	0.82937	1.13667	-0.269912	0.0100042	0.194814	Not Detected	Not Detected	Not Detected	Not Detected	Not Detected	Not Detected	Not Detected	Not Detected	Not Detected	3	3	3	FALSE	A_30_P01019792	chr4:90877414-90917198_F										lincRNA:chr4:90877414-90917198 forward strand	chr4:90916462-90916521	mm|4qC5
645	A_30_P01019794	0.305977	0.348062	0.345697	0.396559	0.315091	0.334149	0.407783	0.492326	0.38388	0.333245	0.3486	0.427996	1.04608	1.22776	0.0649867	0.296026	0.636134	0.115793	Detected	Detected	Detected	Detected	Detected	Detected	Detected	Detected	Detected	0	0	0	FALSE	A_30_P01019794	chr2:167388900-167402475_R										lincRNA:chr2:167388900-167402475 reverse strand	chr2:167399741-167399682	mm|2qH3
646	A_30_P01019796	0.066451	0.070973	0.0768071	0.084245	0.0557945	0.0935374	0.0782605	0.0957268	0.10625	0.0714104	0.077859	0.0934124	1.0903	1.19976	0.124729	0.262752	0.726324	0.351355	Detected	Detected	Detected	Not Detected	Not Detected	Not Detected	Not Detected	Not Detected	Detected	0	3	2	FALSE	A_30_P01019796	chr2:129402701-129403112_R										lincRNA:chr2:129402701-129403112 reverse strand	chr2:129402931-129402872	mm|2qF1
647	A_30_P01019797	0.166025	0.198083	0.20247	0.460108	0.224512	0.328746	0.38369	0.446865	0.239528	0.188859	0.337789	0.356694	1.78858	1.05597	0.838812	0.0785662	0.109741	0.83195	Detected	Detected	Detected	Detected	Detected	Detected	Detected	Detected	Detected	0	0	0	FALSE	A_30_P01019797	chr19:5001448-5001810_R										lincRNA:chr19:5001448-5001810 reverse strand	chr19:5001671-5001612	mm|19qA
648	A_30_P01019807	1.6516	2.3107	1.78456	1.8336	4.41261	4.46508	4.35365	4.57439	3.92304	1.91562	3.57043	4.28369	1.86385	1.19977	0.898286	0.262758	0.191804	0.475867	Detected	Detected	Detected	Detected	Detected	Detected	Detected	Detected	Detected	0	0	0	FALSE	A_30_P01019807	chr17:32035750-32056000_R										lincRNA:chr17:32035750-32056000 reverse strand	chr17:32045043-32044984	mm|17qB1
649	A_30_P01019808	0.0130744	0.0172661	0.0299872	0.0523653	0.0305042	0.0316688	0.0618088	0.0388672	0.038817	0.0201093	0.0381795	0.0464977	1.8986	1.21787	0.924936	0.284361	0.0960459	0.431771	Not Detected	Not Detected	Not Detected	Not Detected	Not Detected	Not Detected	Not Detected	Not Detected	Not Detected	3	3	3	FALSE	A_30_P01019808	chr10:56151791-56184966_F										lincRNA:chr10:56151791-56184966 forward strand	chr10:56159602-56159661	mm|10qB4
650	A_30_P01019812	0.0467365	0.0229458	0.0388842	0.0256078	0.0321291	0.0300497	0.0698063	0.0271749	0.0200863	0.0361888	0.0292622	0.0390225	0.808599	1.33355	-0.306504	0.415267	0.505394	0.73963	Not Detected	Not Detected	Not Detected	Not Detected	Not Detected	Not Detected	Not Detected	Not Detected	Not Detected	3	3	3	FALSE	A_30_P01019812	chr5:20459718-20462031_F										lincRNA:chr5:20459718-20462031 forward strand	chr5:20461244-20461303	mm|5qA3
651	A_30_P01019816	0.0421386	0.0499483	0.0595745	0.0303109	0.0267172	0.0253103	0.019999	0.0229477	0.0166213	0.0505538	0.0274462	0.019856	0.54291	0.723452	-0.881215	-0.46703	0.0123325	0.0508806	Not Detected	Detected	Detected	Not Detected	Not Detected	Not Detected	Not Detected	Not Detected	Not Detected	1	3	3	FALSE	A_30_P01019816	chr3:30064327-30064680_R										lincRNA:chr3:30064327-30064680 reverse strand	chr3:30064387-30064328	mm|3qA3
652	A_30_P01019818	0.0104264	0.0088724	0.00889837	0.0188852	0.0249349	0.0234676	0.0186218	0.021458	0.0160885	0.00939904	0.0224293	0.0187228	2.38633	0.834748	1.2548	-0.260587	0.00200964	0.202055	Not Detected	Not Detected	Not Detected	Not Detected	Not Detected	Not Detected	Not Detected	Not Detected	Not Detected	3	3	3	FALSE	A_30_P01019818	chr11:96175764-96176029_F										lincRNA:chr11:96175764-96176029 forward strand	chr11:96175970-96176029	mm|11qD
653	A_30_P01019821	0.0110614	0.00943811	0.00954955	0.0202355	0.5157	0.0253025	0.0198617	0.0234785	0.0176549	0.0100163	0.187079	0.0203317	18.6774	0.10868	4.22322	-3.20185	0.216604	0.383542	Not Detected	Not Detected	Not Detected	Not Detected	Detected	Not Detected	Not Detected	Not Detected	Not Detected	3	2	3	FALSE	A_30_P01019821	chr9:98854207-98855598_R										lincRNA:chr9:98854207-98855598 reverse strand	chr9:98854275-98854216	mm|9qE3.3
654	A_30_P01019823	0.470267	0.392204	0.447232	1.30424	0.798492	0.661637	0.824449	0.664657	0.470564	0.436568	0.921456	0.653223	2.11068	0.708904	1.07771	-0.496339	0.0643095	0.27894	Detected	Detected	Detected	Detected	Detected	Detected	Detected	Detected	Detected	0	0	0	FALSE	A_30_P01019823	chr3:87764926-87769766_R										lincRNA:chr3:87764926-87769766 reverse strand	chr3:87765002-87764943	mm|3qF1
655	A_30_P01019825	0.615891	0.61913	0.779956	1.35157	1.02281	1.1723	1.21548	1.35819	1.00323	0.671659	1.18223	1.1923	1.76016	1.00852	0.815708	0.0122385	0.00726523	0.954651	Detected	Detected	Detected	Detected	Detected	Detected	Detected	Detected	Detected	0	0	0	FALSE	A_30_P01019825	chr15:79764481-79809909_F										lincRNA:chr15:79764481-79809909 forward strand	chr15:79801504-79801563	mm|15qE1
656	A_30_P01019830	0.527913	0.442554	0.618612	0.997314	0.866411	0.858917	0.828172	0.981901	0.885241	0.529693	0.907547	0.898438	1.71335	0.989963	0.776817	-0.0145531	0.0157531	0.890328	Detected	Detected	Detected	Detected	Detected	Detected	Detected	Detected	Detected	0	0	0	FALSE	A_30_P01019830	chrX:50087925-50101700_F										lincRNA:chrX:50087925-50101700 forward strand	chrX:50097844-50097903	mm|XqA5
657	A_30_P01019831	0.128566	0.144186	0.17056	0.183616	0.269279	0.391853	0.293752	0.337873	0.202445	0.147771	0.281583	0.278023	1.90554	0.987358	0.930202	-0.0183555	0.0959272	0.966179	Detected	Detected	Detected	Detected	Detected	Detected	Detected	Detected	Detected	0	0	0	FALSE	A_30_P01019831	chr18:38302523-38302756_R										lincRNA:chr18:38302523-38302756 reverse strand	chr18:38302750-38302691	mm|18qB3
658	A_30_P01019834	0.0321056	0.0347271	0.0548423	0.0239036	0.0317585	0.0344289	0.0527201	0.0405781	0.0272093	0.0405583	0.0300303	0.0401692	0.740422	1.33762	-0.43358	0.41967	0.240269	0.310554	Not Detected	Not Detected	Not Detected	Not Detected	Not Detected	Not Detected	Not Detected	Not Detected	Not Detected	3	3	3	FALSE	A_30_P01019834	chr1:85156338-85167730_R										lincRNA:chr1:85156338-85167730 reverse strand	chr1:85160938-85160879	mm|1qC5
659	A_30_P01019844	0.0161216	0.00838944	0.00849739	0.0483676	0.0243231	0.0229092	0.0182228	0.0282643	0.0156422	0.0110028	0.0318666	0.0207097	2.89623	0.649888	1.53417	-0.621737	0.0315456	0.254028	Not Detected	Not Detected	Not Detected	Not Detected	Not Detected	Not Detected	Not Detected	Not Detected	Not Detected	3	3	3	FALSE	A_30_P01019844	chr12:33808493-33829143_F										lincRNA:chr12:33808493-33829143 forward strand	chr12:33827246-33827305	mm|12qA3
660	A_30_P01019855	0.0103877	0.017879	0.00887945	0.0462884	0.0252922	0.0236936	0.0188639	0.0216263	0.0159664	0.012382	0.0317581	0.0188189	2.56485	0.592569	1.35887	-0.754944	0.0352156	0.138727	Not Detected	Not Detected	Not Detected	Not Detected	Not Detected	Not Detected	Not Detected	Not Detected	Not Detected	3	3	3	FALSE	A_30_P01019855	chr12:55401761-55418611_F										lincRNA:chr12:55401761-55418611 forward strand	chr12:55416062-55416121	mm|12qC1
661	A_30_P01019857	0.0116049	0.00978583	0.00993797	0.0213117	1.13446	0.0264931	0.0210696	0.0241248	0.0176935	0.0104429	0.394088	0.0209627	37.7374	0.0531928	5.23792	-4.23262	0.242852	0.385281	Not Detected	Not Detected	Not Detected	Not Detected	Detected	Not Detected	Not Detected	Not Detected	Not Detected	3	2	3	FALSE	A_30_P01019857	chr1:194659312-194661407_R										lincRNA:chr1:194659312-194661407 reverse strand	chr1:194659429-194659370	mm|1qH6
662	A_30_P01019859	0.0126808	0.0107333	0.010666	0.0230489	0.219868	0.0293125	0.0228642	0.0265953	0.0199465	0.01136	0.0907431	0.0231353	7.98792	0.254954	2.99782	-1.97169	0.16289	0.363126	Not Detected	Not Detected	Not Detected	Not Detected	Detected	Not Detected	Not Detected	Not Detected	Not Detected	3	2	3	FALSE	A_30_P01019859	chr7:113768215-113783490_F										lincRNA:chr7:113768215-113783490 forward strand	chr7:113780668-113780727	mm|7qE3
663	A_30_P01019860	0.0120793	0.0109831	0.0102497	0.0281319	0.0600591	0.0267519	0.0669229	0.0797138	0.0316499	0.011104	0.0383143	0.0594289	3.45049	1.55109	1.7868	0.633281	0.0427893	0.318561	Not Detected	Not Detected	Not Detected	Not Detected	Not Detected	Not Detected	Not Detected	Not Detected	Not Detected	3	3	3	FALSE	A_30_P01019860	chr8:41730287-41746862_R										lincRNA:chr8:41730287-41746862 reverse strand	chr8:41736520-41736461	mm|8qA4
664	A_30_P01019863	0.0421834	0.0518371	0.0607784	0.019349	0.0295413	0.040775	0.032375	0.0431426	0.0292024	0.0515996	0.0298885	0.0349067	0.579238	1.1679	-0.787772	0.223916	0.0973785	0.501136	Not Detected	Detected	Detected	Not Detected	Not Detected	Not Detected	Not Detected	Not Detected	Not Detected	1	3	3	FALSE	A_30_P01019863	chr17:17492400-17507525_F										lincRNA:chr17:17492400-17507525 forward strand	chr17:17506879-17506938	mm|17qA3.2
665	A_30_P01019864	0.0263094	0.0180818	0.0339624	0.0281977	0.0544985	0.0263442	0.0603783	0.0242537	0.0400622	0.0261179	0.0363468	0.0415647	1.39165	1.14356	0.476793	0.193531	0.36137	0.74276	Not Detected	Not Detected	Not Detected	Not Detected	Not Detected	Not Detected	Not Detected	Not Detected	Not Detected	3	3	3	FALSE	A_30_P01019864	chr15:102920547-102933472_R										lincRNA:chr15:102920547-102933472 reverse strand	chr15:102926206-102926147	mm|15qF3
666	A_30_P01019872	0.0541214	0.0394084	0.0448565	0.0317031	0.0311479	0.0358986	0.038771	0.0687555	0.0841986	0.0461288	0.0329165	0.0639084	0.713579	1.94153	-0.486854	0.957193	0.0506613	0.112984	Not Detected	Not Detected	Not Detected	Not Detected	Not Detected	Not Detected	Not Detected	Not Detected	Not Detected	3	3	3	FALSE	A_30_P01019872	chr8:128933150-128943375_F										lincRNA:chr8:128933150-128943375 forward strand	chr8:128935208-128935267	mm|8qE2
667	A_30_P01019875	0.0111067	0.0568276	0.0131105	0.0201094	0.0265516	0.0247224	0.0197055	0.0226344	0.0169731	0.0270149	0.0237945	0.019771	0.880789	0.830908	-0.183131	-0.26724	0.793719	0.190434	Not Detected	Detected	Not Detected	Not Detected	Not Detected	Not Detected	Not Detected	Not Detected	Not Detected	2	3	3	FALSE	A_30_P01019875	chr5:110182844-110228345_R										lincRNA:chr5:110182844-110228345 reverse strand	chr5:110183320-110183261	mm|5qF
668	A_30_P01019877	0.0127274	0.0107694	0.0379223	0.025891	0.0312871	0.0292305	0.0325573	0.0264591	0.0195497	0.020473	0.0288029	0.0261887	1.40687	0.909238	0.492488	-0.13727	0.328285	0.532681	Not Detected	Not Detected	Not Detected	Not Detected	Not Detected	Not Detected	Not Detected	Not Detected	Not Detected	3	3	3	FALSE	A_30_P01019877	chr17:6495982-6514626_R										lincRNA:chr17:6495982-6514626 reverse strand	chr17:6506072-6506013	mm|17qA1
669	A_30_P01019881	0.0408242	0.0185929	0.0246989	0.0500627	0.0258567	0.0541642	0.0490094	0.0199344	0.0362278	0.0280387	0.0433612	0.0350572	1.54648	0.808492	0.628985	-0.306695	0.251667	0.55457	Not Detected	Not Detected	Not Detected	Not Detected	Not Detected	Not Detected	Not Detected	Not Detected	Not Detected	3	3	3	FALSE	A_30_P01019881	chr3:117995784-117996372_F										lincRNA:chr3:117995784-117996372 forward strand	chr3:117996249-117996308	mm|3qG1
670	A_30_P01019882	0.0113753	0.0170913	0.0134732	0.0639735	0.0922824	0.308401	0.0190633	0.0458304	0.0166692	0.0139799	0.154886	0.0271876	11.0792	0.175534	3.46978	-2.51018	0.0377013	0.0561914	Not Detected	Not Detected	Not Detected	Not Detected	Not Detected	Detected	Not Detected	Not Detected	Not Detected	3	2	3	FALSE	A_30_P01019882	chr16:45014806-45029475_F										lincRNA:chr16:45014806-45029475 forward strand	chr16:45027197-45027256	mm|16qB5
671	A_30_P01019883	0.113405	0.0974536	0.0816614	0.0797123	0.0460184	0.028981	0.0546012	0.0458618	0.0504155	0.0975065	0.0515706	0.0502928	0.528894	0.975223	-0.918951	-0.0361959	0.12421	0.863843	Detected	Detected	Detected	Not Detected	Not Detected	Not Detected	Not Detected	Not Detected	Not Detected	0	3	3	FALSE	A_30_P01019883	chr2:155289631-155292565_R										lincRNA:chr2:155289631-155292565 reverse strand	chr2:155290223-155290164	mm|2qH1
672	A_30_P01019885	0.0909705	0.0898397	0.0932877	0.19208	0.0951552	0.122898	0.125582	0.111668	0.12992	0.091366	0.136711	0.12239	1.4963	0.895245	0.581402	-0.159646	0.221089	0.768992	Detected	Detected	Detected	Detected	Not Detected	Not Detected	Detected	Not Detected	Detected	0	2	1	FALSE	A_30_P01019885	chr14:65433420-65434061_R										lincRNA:chr14:65433420-65434061 reverse strand	chr14:65433540-65433481	mm|14qD1
673	A_30_P01019886	0.00964656	0.00823567	0.0174183	0.0177608	0.0237832	0.0224925	0.0332264	0.0205287	0.0149483	0.0117669	0.0213455	0.0229011	1.81404	1.07288	0.859204	0.101486	0.0913809	0.931499	Not Detected	Not Detected	Not Detected	Not Detected	Not Detected	Not Detected	Not Detected	Not Detected	Not Detected	3	3	3	FALSE	A_30_P01019886	chr17:26911397-26917047_R										lincRNA:chr17:26911397-26917047 reverse strand
674	A_30_P01019891	0.0639589	0.0570283	0.0568065	0.0746398	0.0518617	0.045315	0.0524197	0.110773	0.0546493	0.0592646	0.0572722	0.0726138	0.966382	1.26787	-0.0493349	0.34241	0.749337	0.533307	Detected	Detected	Detected	Not Detected	Not Detected	Not Detected	Not Detected	Not Detected	Not Detected	0	3	3	FALSE	A_30_P01019891	chr18:73863912-73864665_F										lincRNA:chr18:73863912-73864665 forward strand	chr18:73864475-73864534	mm|18qE2
675	A_30_P01019894	0.00933176	0.0215899	0.0171946	0.0172169	0.0230456	0.0218567	0.0173778	0.0200112	0.0145841	0.0160388	0.0207064	0.0173244	1.29102	0.836667	0.368513	-0.257274	0.348089	0.235323	Not Detected	Not Detected	Not Detected	Not Detected	Not Detected	Not Detected	Not Detected	Not Detected	Not Detected	3	3	3	FALSE	A_30_P01019894	chr8:59994074-60002058_R										lincRNA:chr8:59994074-60002058 reverse strand
676	A_30_P01019895	0.220285	0.194541	0.206524	0.25146	0.229106	0.214991	0.221434	0.20274	0.204138	0.207116	0.231853	0.209437	1.11943	0.903321	0.162766	-0.146689	0.129185	0.14808	Detected	Detected	Detected	Detected	Detected	Detected	Detected	Detected	Detected	0	0	0	FALSE	A_30_P01019895	chr14:61240427-61325677_R										lincRNA:chr14:61240427-61325677 reverse strand	chr14:61261883-61261824	mm|14qD1
677	A_30_P01019898	0.268801	0.242091	0.235178	0.173764	0.0863989	0.11685	0.348649	0.108631	0.11756	0.24869	0.125671	0.191613	0.505332	1.52472	-0.984695	0.608544	0.0651293	0.518873	Detected	Detected	Detected	Detected	Not Detected	Not Detected	Detected	Not Detected	Detected	0	2	1	FALSE	A_30_P01019898	chr2:130697320-130729670_R										lincRNA:chr2:130697320-130729670 reverse strand	chr2:130706796-130706737	mm|2qF1
678	A_30_P01019903	0.0345894	0.0311137	0.040938	0.0563852	0.0286964	0.0388537	0.0429683	0.0248558	0.0630239	0.035547	0.0413118	0.043616	1.16217	1.05578	0.216824	0.0783038	0.61834	0.949125	Not Detected	Not Detected	Not Detected	Not Detected	Not Detected	Not Detected	Not Detected	Not Detected	Not Detected	3	3	3	FALSE	A_30_P01019903	chr17:79042382-79052046_R										lincRNA:chr17:79042382-79052046 reverse strand	chr17:79048853-79048794	mm|17qE3
679	A_30_P01019904	0.0417118	0.0347833	0.0675917	0.207407	0.128095	0.0888003	0.152243	0.146978	0.413349	0.0480289	0.141434	0.237523	2.94477	1.67939	1.55816	0.747935	0.0302929	0.343259	Not Detected	Not Detected	Detected	Detected	Not Detected	Not Detected	Detected	Detected	Detected	2	2	0	FALSE	A_30_P01019904	chr17:13185488-13187031_R										lincRNA:chr17:13185488-13187031 reverse strand	chr17:13185607-13185548	mm|17qA1
680	A_30_P01019905	0.00992086	0.00848601	0.00855344	0.0410635	0.0240423	0.0227964	0.01801	0.0255811	0.0156913	0.00898677	0.0293007	0.0197608	3.26043	0.674413	1.70506	-0.568296	0.0199034	0.190851	Not Detected	Not Detected	Not Detected	Not Detected	Not Detected	Not Detected	Not Detected	Not Detected	Not Detected	3	3	3	FALSE	A_30_P01019905	chr8:91530286-91530495_R										lincRNA:chr8:91530286-91530495 reverse strand	chr8:91530458-91530399	mm|8qC3
681	A_30_P01019907	0.95521	1.01817	0.946083	0.569865	0.498304	0.670337	0.651634	0.541873	0.553313	0.973153	0.579502	0.582273	0.595489	1.00478	-0.747854	0.00688376	0.0198156	0.937799	Detected	Detected	Detected	Detected	Detected	Detected	Detected	Detected	Detected	0	0	0	FALSE	A_30_P01019907	chr13:76326228-76332632_F										lincRNA:chr13:76326228-76332632 forward strand	chr13:76327221-76327280	mm|13qC1
682	A_30_P01019912	13.8048	13.1022	14.7112	50.2032	39.857	34.3835	28.5614	32.6515	36.1611	13.8727	41.4812	32.458	2.99013	0.782474	1.58021	-0.353885	0.00627139	0.154586	Detected	Detected	Detected	Detected	Detected	Detected	Detected	Detected	Detected	0	0	0	FALSE	A_30_P01019912	chr17:39960567-39992817_R										lincRNA:chr17:39960567-39992817 reverse strand	chr17:39980356-39980297	mm|17qB1
683	A_30_P01019919	0.0116265	0.021285	0.0189529	0.0319436	0.0276573	0.025709	0.0204711	0.0293272	0.0177155	0.0172881	0.0284366	0.0225046	1.64486	0.791394	0.717968	-0.337532	0.092305	0.228013	Not Detected	Not Detected	Not Detected	Not Detected	Not Detected	Not Detected	Not Detected	Not Detected	Not Detected	3	3	3	FALSE	A_30_P01019919	chrX:20376867-20377837_F										lincRNA:chrX:20376867-20377837 forward strand	chrX:20377778-20377837	mm|XqA1.3
684	A_30_P01019921	0.0543238	0.0431939	0.0520786	0.0188938	0.0234376	0.0443795	0.0176188	0.0202506	0.0547437	0.0498655	0.0289037	0.0308711	0.579633	1.06807	-0.786789	0.095003	0.132393	0.996529	Detected	Detected	Detected	Not Detected	Not Detected	Not Detected	Not Detected	Not Detected	Not Detected	0	3	3	FALSE	A_30_P01019921	chr1:164595106-164601906_F										lincRNA:chr1:164595106-164601906 forward strand	chr1:164601756-164601815	mm|1qH2.1
685	A_30_P01019928	0.0723589	0.0676114	0.0690248	0.0684616	0.0402426	0.0239295	0.0544081	0.0630881	0.0502851	0.0696651	0.0442112	0.0559271	0.634626	1.265	-0.656023	0.339134	0.214159	0.402048	Detected	Detected	Detected	Not Detected	Not Detected	Not Detected	Not Detected	Not Detected	Not Detected	0	3	3	FALSE	A_30_P01019928	chr12:83271350-83357214_F										lincRNA:chr12:83271350-83357214 forward strand	chr12:83336455-83336514	mm|12qD1
686	A_30_P01019936	0.104274	0.13245	0.13598	0.144189	0.0921462	0.0825095	0.128925	0.170811	0.0838863	0.124235	0.106282	0.127874	0.85549	1.20316	-0.225176	0.26683	0.417169	0.553028	Detected	Detected	Detected	Detected	Not Detected	Not Detected	Detected	Detected	Detected	0	2	0	FALSE	A_30_P01019936	chr11:53592946-53637922_R										lincRNA:chr11:53592946-53637922 reverse strand	chr11:53597232-53597173	mm|11qB1.3
687	A_30_P01019939	0.0170205	0.00902826	0.020159	0.0205396	0.0256819	0.0589742	0.0281903	0.0268647	0.0555102	0.0154026	0.0350652	0.0368551	2.27658	1.05104	1.18687	0.0718217	0.134338	0.814106	Not Detected	Not Detected	Not Detected	Not Detected	Not Detected	Not Detected	Not Detected	Not Detected	Not Detected	3	3	3	FALSE	A_30_P01019939	chr8:49853937-49874087_F										lincRNA:chr8:49853937-49874087 forward strand	chr8:49862797-49862856	mm|8qB1.2
688	A_30_P01019948	0.12798	0.144294	0.0968424	0.0821116	0.0732278	0.0665482	0.0686287	0.112533	0.0428767	0.123039	0.0739626	0.0746795	0.601133	1.00969	-0.734244	0.0139161	0.0331601	0.843801	Detected	Detected	Detected	Not Detected	Not Detected	Not Detected	Not Detected	Detected	Not Detected	0	3	2	FALSE	A_30_P01019948	chr8:4325209-4348788_F										lincRNA:chr8:4325209-4348788 forward strand	chr8:4348589-4348648	mm|8qA1.1
689	A_30_P01019953	0.0117792	0.00996806	0.0101339	0.0307975	0.0285453	0.0266878	0.0212382	0.0245358	0.0405977	0.0106271	0.0286769	0.0287906	2.69847	1.00397	1.43214	0.00570943	0.000177679	0.8782	Not Detected	Not Detected	Not Detected	Not Detected	Not Detected	Not Detected	Not Detected	Not Detected	Not Detected	3	3	3	FALSE	A_30_P01019953	chr17:46058814-46059304_F										lincRNA:chr17:46058814-46059304 forward strand	chr17:46059101-46059160	mm|17qC
690	A_30_P01019957	0.0105596	0.0090968	0.00908085	0.0193478	0.0257578	0.119474	0.0192419	0.105771	0.0167601	0.00957909	0.0548599	0.0472576	5.72705	0.861422	2.51779	-0.215208	0.129318	0.831739	Not Detected	Not Detected	Not Detected	Not Detected	Not Detected	Not Detected	Not Detected	Not Detected	Not Detected	3	3	3	FALSE	A_30_P01019957	chr17:13220550-13236900_R										lincRNA:chr17:13220550-13236900 reverse strand	chr17:13227606-13227547	mm|17qA1
691	A_30_P01019966	0.0569327	0.054732	0.0413942	0.0481208	0.0284135	0.0265208	0.0208286	0.037362	0.018598	0.0510196	0.0343517	0.0255962	0.673303	0.745122	-0.570671	-0.424452	0.139989	0.346607	Not Detected	Detected	Not Detected	Not Detected	Not Detected	Not Detected	Not Detected	Not Detected	Not Detected	2	3	3	FALSE	A_30_P01019966	chr6:119798500-119817050_F										lincRNA:chr6:119798500-119817050 forward strand	chr6:119807180-119807239	mm|6qF1
692	A_30_P01019972	1.81083	1.80102	1.78786	1.69035	0.873627	0.841808	0.894697	0.912846	0.966882	1.7999	1.13526	0.924808	0.630734	0.814621	-0.664896	-0.295798	0.150681	0.573522	Detected	Detected	Detected	Detected	Detected	Detected	Detected	Detected	Detected	0	0	0	FALSE	A_30_P01019972	chr3:127037711-127111912_R										lincRNA:chr3:127037711-127111912 reverse strand	chr3:127037904-127037845	mm|3qG2
693	A_30_P01019976	0.0120542	0.0101522	0.0102554	0.0220842	0.0294438	0.0274114	0.0215586	0.0253493	0.0191364	0.0108206	0.0263132	0.0220147	2.43176	0.836644	1.282	-0.257314	0.00197726	0.209209	Not Detected	Not Detected	Not Detected	Not Detected	Not Detected	Not Detected	Not Detected	Not Detected	Not Detected	3	3	3	FALSE	A_30_P01019976	chr8:44232164-44266991_F										lincRNA:chr8:44232164-44266991 forward strand	chr8:44250354-44250413	mm|8qA4
694	A_30_P01019982	0.0192036	0.00946733	0.0095673	0.0205272	0.0271734	0.0257808	0.0316922	0.0233391	0.0169583	0.0127461	0.0244938	0.0239965	1.92167	0.979697	0.942362	-0.0295919	0.0809859	0.835103	Not Detected	Not Detected	Not Detected	Not Detected	Not Detected	Not Detected	Not Detected	Not Detected	Not Detected	3	3	3	FALSE	A_30_P01019982	chr10:72726649-72799726_R										lincRNA:chr10:72726649-72799726 reverse strand	chr10:72745856-72745797	mm|10qB5.3
695	A_30_P01019985	0.158797	0.123066	0.105031	0.224142	0.108183	0.0673193	0.0647155	0.0798296	0.0847569	0.128965	0.133215	0.076434	1.03295	0.573766	0.046776	-0.801466	0.852305	0.335943	Detected	Detected	Detected	Detected	Not Detected	Not Detected	Not Detected	Not Detected	Not Detected	0	2	3	FALSE	A_30_P01019985	chr4:12159175-12175725_R										lincRNA:chr4:12159175-12175725 reverse strand	chr4:12160276-12160217	mm|4qA1
696	A_30_P01019986	1.47204	1.46517	1.43562	2.47189	2.75847	2.50524	2.16028	2.57127	2.31027	1.45761	2.57854	2.34728	1.76902	0.910314	0.822949	-0.135564	0.00253677	0.204519	Detected	Detected	Detected	Detected	Detected	Detected	Detected	Detected	Detected	0	0	0	FALSE	A_30_P01019986	chr4:133368314-133380210_R										lincRNA:chr4:133368314-133380210 reverse strand	chr4:133376815-133376756	mm|4qD3
697	A_30_P01019988	0.280701	0.222175	0.217901	0.209456	0.181405	0.143982	0.157609	0.157214	0.136819	0.240259	0.178281	0.150547	0.742036	0.844438	-0.430439	-0.243936	0.0953758	0.280641	Detected	Detected	Detected	Detected	Detected	Detected	Detected	Detected	Detected	0	0	0	FALSE	A_30_P01019988	chr5:31862823-31871445_F										lincRNA:chr5:31862823-31871445 forward strand	chr5:31869278-31869337	mm|5qB1
698	A_30_P01019989	0.00985932	0.00848245	0.00857095	0.018373	0.0243609	0.0231764	0.0183938	0.0211522	0.0152792	0.00897091	0.0219701	0.0182751	2.44904	0.831815	1.29222	-0.265665	0.00246951	0.221671	Not Detected	Not Detected	Not Detected	Not Detected	Not Detected	Not Detected	Not Detected	Not Detected	Not Detected	3	3	3	FALSE	A_30_P01019989	chr11:95359115-95369547_R										lincRNA:chr11:95359115-95369547 reverse strand
699	A_30_P01019991	0.0114085	0.00960893	0.0123324	0.0210615	0.0279742	0.0260726	0.0206532	0.0241596	0.0181302	0.0111166	0.0250361	0.020981	2.25214	0.838029	1.17129	-0.254929	0.00215286	0.212359	Not Detected	Not Detected	Not Detected	Not Detected	Not Detected	Not Detected	Not Detected	Not Detected	Not Detected	3	3	3	FALSE	A_30_P01019991	chr14:19295319-19310619_R										lincRNA:chr14:19295319-19310619 reverse strand	chr14:19296314-19296255	mm|14qA2
700	A_30_P01019994	0.0833767	0.225926	0.0515344	0.145176	0.0913283	0.0684957	0.021476	0.0621002	0.022693	0.120279	0.101667	0.0354231	0.845256	0.348424	-0.242539	-1.52109	0.966535	0.0604664	Detected	Detected	Detected	Detected	Not Detected	Not Detected	Not Detected	Not Detected	Not Detected	0	2	3	FALSE	A_30_P01019994	chrX:73008593-73009966_R										lincRNA:chrX:73008593-73009966 reverse strand	chrX:73008653-73008594	mm|XqA7.3
701	A_30_P01019997	0.0110256	0.00934465	0.00947449	0.0202138	0.0268501	0.0251566	0.0198231	0.0342016	0.0175834	0.00994825	0.0240735	0.0238694	2.41988	0.991519	1.27493	-0.0122879	0.00209767	0.85303	Not Detected	Not Detected	Not Detected	Not Detected	Not Detected	Not Detected	Not Detected	Not Detected	Not Detected	3	3	3	FALSE	A_30_P01019997	chr15:6915910-6915980_R										lincRNA:chr15:6915910-6915980 reverse strand	chr15:6915970-6915911	mm|15qA1
702	A_30_P01020000	0.015203	0.0088568	0.00886593	0.0187811	0.0248173	0.0235133	0.0185721	0.0215412	0.0161399	0.0109753	0.0223706	0.0187511	2.03827	0.838203	1.02735	-0.254629	0.0369527	0.213423	Not Detected	Not Detected	Not Detected	Not Detected	Not Detected	Not Detected	Not Detected	Not Detected	Not Detected	3	3	3	FALSE	A_30_P01020000	chr2:181022680-181027214_R										lincRNA:chr2:181022680-181027214 reverse strand	chr2:181026801-181026742	mm|2qH4
703	A_30_P01020001	0.438754	0.462552	0.461989	0.19839	0.0894822	0.194791	0.151468	0.0558849	0.147862	0.454431	0.160888	0.118405	0.354041	0.735948	-1.49801	-0.442324	0.0518849	0.467568	Detected	Detected	Detected	Detected	Not Detected	Detected	Detected	Not Detected	Detected	0	1	1	FALSE	A_30_P01020001	chr12:53669892-53710742_F										lincRNA:chr12:53669892-53710742 forward strand	chr12:53672671-53672730	mm|12qC1
704	A_30_P01020003	0.186602	0.235222	0.186541	0.0602386	0.0470684	0.0894445	0.157905	0.0611947	0.128042	0.202788	0.0655838	0.115714	0.323411	1.76437	-1.62856	0.819152	0.0145235	0.209672	Detected	Detected	Detected	Not Detected	Not Detected	Not Detected	Detected	Not Detected	Detected	0	3	1	FALSE	A_30_P01020003	chr14:77511189-77522852_F										lincRNA:chr14:77511189-77522852 forward strand	chr14:77511610-77511669	mm|14qD3
705	A_30_P01020004	0.219123	0.180441	0.170122	0.147291	0.102562	0.120797	0.103677	0.171935	0.125855	0.189895	0.12355	0.133822	0.650622	1.08314	-0.620109	0.115225	0.03252	0.724586	Detected	Detected	Detected	Detected	Not Detected	Detected	Detected	Detected	Detected	0	1	0	FALSE	A_30_P01020004	chr4:133212951-133214017_R										lincRNA:chr4:133212951-133214017 reverse strand	chr4:133213792-133213733	mm|4qD3
706	A_30_P01020006	0.0115314	0.00976348	0.00995927	0.0208275	0.0280821	0.0265778	0.020945	0.0241396	0.0185974	0.010418	0.0251625	0.0212274	2.41528	0.843612	1.27219	-0.245349	0.00295166	0.233816	Not Detected	Not Detected	Not Detected	Not Detected	Not Detected	Not Detected	Not Detected	Not Detected	Not Detected	3	3	3	FALSE	A_30_P01020006	chr12:111287772-111333890_R										lincRNA:chr12:111287772-111333890 reverse strand	chr12:111325559-111325500	mm|12qF1
707	A_30_P01020009	0.0114958	0.00976523	0.0246218	0.044667	0.0279394	0.0261621	0.991215	0.0243068	0.0223205	0.0152943	0.0329229	0.345947	2.15262	10.5078	1.1061	3.39339	0.0823954	0.533967	Not Detected	Not Detected	Not Detected	Not Detected	Not Detected	Not Detected	Detected	Not Detected	Not Detected	3	3	2	FALSE	A_30_P01020009	chr13:112717680-112733330_F										lincRNA:chr13:112717680-112733330 forward strand	chr13:112727917-112727976	mm|13qD2.2
708	A_30_P01020010	0.0105452	0.00992681	0.00868098	0.0410269	0.0243109	0.0230661	0.0425703	0.021189	0.015854	0.00971765	0.029468	0.0265378	3.03242	0.900563	1.60047	-0.151102	0.0201995	0.674908	Not Detected	Not Detected	Not Detected	Not Detected	Not Detected	Not Detected	Not Detected	Not Detected	Not Detected	3	3	3	FALSE	A_30_P01020010	chr12:25866632-25874507_F										lincRNA:chr12:25866632-25874507 forward strand	chr12:25874385-25874444	mm|12qA1.3
709	A_30_P01020013	0.612224	0.585286	0.60989	1.12781	0.900565	0.921705	0.95831	0.872455	1.92579	0.602467	0.98336	1.25218	1.63222	1.27337	0.706837	0.348656	0.0178309	0.549565	Detected	Detected	Detected	Detected	Detected	Detected	Detected	Detected	Detected	0	0	0	FALSE	A_30_P01020013	chrX:120963050-120963598_F										lincRNA:chrX:120963050-120963598 forward strand	chrX:120963094-120963153	mm|XqE3
710	A_30_P01020019	0.393434	0.429402	0.394331	0.407708	0.467548	0.385828	0.502679	0.49099	0.489783	0.405722	0.420361	0.494484	1.03608	1.17633	0.0511372	0.234294	0.642151	0.0982256	Detected	Detected	Detected	Detected	Detected	Detected	Detected	Detected	Detected	0	0	0	FALSE	A_30_P01020019	chr11:112898724-113062945_R										lincRNA:chr11:112898724-113062945 reverse strand	chr11:112899535-112899476	mm|11qE2
711	A_30_P01020025	0.014964	0.00958315	0.0159572	0.0206421	0.0272804	0.0260397	0.0204907	0.0234878	0.0172771	0.0135014	0.0246541	0.0204186	1.82603	0.828203	0.868712	-0.271944	0.0410127	0.201462	Not Detected	Not Detected	Not Detected	Not Detected	Not Detected	Not Detected	Not Detected	Not Detected	Not Detected	3	3	3	FALSE	A_30_P01020025	chr11:22510175-22522025_R										lincRNA:chr11:22510175-22522025 reverse strand	chr11:22516321-22516262	mm|11qA3.2
712	A_30_P01020028	0.125958	0.159156	0.133133	0.116428	0.126934	0.125015	0.127052	0.161904	0.106698	0.139415	0.122792	0.131885	0.880766	1.07405	-0.183169	0.103056	0.217948	0.684846	Detected	Detected	Detected	Detected	Detected	Detected	Detected	Detected	Detected	0	0	0	FALSE	A_30_P01020028	chr10:56151791-56184966_R										lincRNA:chr10:56151791-56184966 reverse strand
713	A_30_P01020029	0.0415155	0.045362	0.0215417	0.0202949	0.0268127	0.0256801	0.0202062	0.0231445	0.0170532	0.0361397	0.0242626	0.0201346	0.671355	0.829864	-0.574853	-0.269054	0.266383	0.20517	Not Detected	Not Detected	Not Detected	Not Detected	Not Detected	Not Detected	Not Detected	Not Detected	Not Detected	3	3	3	FALSE	A_30_P01020029	chr13:99890903-99892577_R										lincRNA:chr13:99890903-99892577 reverse strand	chr13:99891037-99890978	mm|13qD1
714	A_30_P01020034	0.0251936	0.0319069	0.0355435	0.0833936	0.0374152	0.0757914	0.0938062	0.047657	0.0427561	0.0308813	0.0655334	0.0614064	2.1221	0.937025	1.0855	-0.0938407	0.0929785	0.850334	Not Detected	Not Detected	Not Detected	Not Detected	Not Detected	Not Detected	Not Detected	Not Detected	Not Detected	3	3	3	FALSE	A_30_P01020034	chr18:78188082-78194070_F										lincRNA:chr18:78188082-78194070 forward strand	chr18:78192358-78192417	mm|18qE3
715	A_30_P01020038	0.0213944	0.023927	0.0254225	0.0384659	0.0254261	0.023817	0.0217513	0.0217788	0.0163276	0.0235813	0.0292363	0.0199526	1.23981	0.682459	0.310117	-0.551187	0.325191	0.120287	Not Detected	Not Detected	Not Detected	Not Detected	Not Detected	Not Detected	Not Detected	Not Detected	Not Detected	3	3	3	FALSE	A_30_P01020038	chr4:132641388-132645061_F										lincRNA:chr4:132641388-132645061 forward strand	chr4:132644071-132644130	mm|4qD2.3
716	A_30_P01020039	0.0561264	0.0438328	0.044575	0.0913059	0.0382965	0.0243452	0.0533565	0.0511095	0.0488994	0.0481781	0.0513159	0.0511218	1.06513	0.996219	0.0910287	-0.00546525	0.849552	0.737088	Detected	Not Detected	Not Detected	Not Detected	Not Detected	Not Detected	Not Detected	Not Detected	Not Detected	2	3	3	FALSE	A_30_P01020039	chr18:35970772-35971449_F										lincRNA:chr18:35970772-35971449 forward strand	chr18:35971258-35971317	mm|18qB2
717	A_30_P01020041	0.0113316	0.00964055	0.00977566	0.0473484	0.0278725	0.0261994	0.0207339	0.0237706	0.0282103	0.0102493	0.0338068	0.0242383	3.29846	0.716964	1.72179	-0.480027	0.019262	0.244516	Not Detected	Not Detected	Not Detected	Not Detected	Not Detected	Not Detected	Not Detected	Not Detected	Not Detected	3	3	3	FALSE	A_30_P01020041	chr7:128400874-128439363_F										lincRNA:chr7:128400874-128439363 forward strand	chr7:128439281-128439340	mm|7qF2
718	A_30_P01020046	0.0128482	0.0109133	0.0110695	0.0239282	0.0318373	0.0298619	0.0237827	0.0269382	0.0200339	0.0116103	0.0285425	0.0235849	2.45837	0.82631	1.2977	-0.275245	0.00210604	0.192549	Not Detected	Not Detected	Not Detected	Not Detected	Not Detected	Not Detected	Not Detected	Not Detected	Not Detected	3	3	3	FALSE	A_30_P01020046	chr19:56580315-56592490_R										lincRNA:chr19:56580315-56592490 reverse strand	chr19:56586842-56586783	mm|19qD2
719	A_30_P01020050	0.0630468	0.0498931	0.0190507	0.0239268	0.18307	0.0301841	0.0240855	0.0272803	0.0472121	0.0439969	0.0790604	0.0328593	1.79695	0.415623	0.845554	-1.26665	0.743908	0.537364	Not Detected	Not Detected	Not Detected	Not Detected	Detected	Not Detected	Not Detected	Not Detected	Not Detected	3	2	3	FALSE	A_30_P01020050	chr2:11454222-11456321_R										lincRNA:chr2:11454222-11456321 reverse strand	chr2:11454863-11454804	mm|2qA1
720	A_30_P01020058	0.0110106	0.00933729	0.00946699	0.020182	0.0268027	0.0251193	0.0197957	0.0233363	0.0175637	0.00993831	0.0240347	0.0202319	2.41839	0.84178	1.27405	-0.248485	0.00211038	0.222149	Not Detected	Not Detected	Not Detected	Not Detected	Not Detected	Not Detected	Not Detected	Not Detected	Not Detected	3	3	3	FALSE	A_30_P01020058	chr11:69195483-69195857_R										lincRNA:chr11:69195483-69195857 reverse strand	chr11:69195738-69195679	mm|11qB3
721	A_30_P01020075	0.233452	0.265277	0.327027	0.367798	0.443495	0.390021	0.315416	0.364946	0.29287	0.275252	0.400438	0.324411	1.45481	0.81014	0.540827	-0.303757	0.0398819	0.0690362	Detected	Detected	Detected	Detected	Detected	Detected	Detected	Detected	Detected	0	0	0	FALSE	A_30_P01020075	chr9:14460976-14488051_F										lincRNA:chr9:14460976-14488051 forward strand	chr9:14484789-14484848	mm|9qA2
722	A_30_P01020083	0.014928	0.0178151	0.0249881	0.0257681	0.029915	0.0253043	0.0200947	0.0231335	0.03417	0.0192437	0.0269958	0.0257994	1.40284	0.955682	0.488348	-0.0653974	0.129131	0.715734	Not Detected	Not Detected	Not Detected	Not Detected	Not Detected	Not Detected	Not Detected	Not Detected	Not Detected	3	3	3	FALSE	A_30_P01020083	chr3:70581406-70614856_F										lincRNA:chr3:70581406-70614856 forward strand	chr3:70606219-70606278	mm|3qE2
723	A_30_P01020091	0.01001	0.00855895	0.00866829	0.0186699	0.0246888	0.0233184	0.0185719	0.0214621	0.0174011	0.00907909	0.0222257	0.019145	2.44801	0.861392	1.29161	-0.215258	0.00212072	0.244503	Not Detected	Not Detected	Not Detected	Not Detected	Not Detected	Not Detected	Not Detected	Not Detected	Not Detected	3	3	3	FALSE	A_30_P01020091	chrX:58387887-58429166_F										lincRNA:chrX:58387887-58429166 forward strand	chrX:58429021-58429080	mm|XqA6
724	A_30_P01020095	0.00937601	0.00800693	0.00807817	0.0171895	0.0229916	0.0217826	0.0173105	0.0199537	0.014673	0.00848704	0.0206545	0.0173124	2.43366	0.83819	1.28313	-0.25465	0.0026233	0.233555	Not Detected	Not Detected	Not Detected	Not Detected	Not Detected	Not Detected	Not Detected	Not Detected	Not Detected	3	3	3	FALSE	A_30_P01020095	chrX:131558071-131594875_R										lincRNA:chrX:131558071-131594875 reverse strand	chrX:131558131-131558072	mm|XqE3
725	A_30_P01020100	0.0125695	0.00983292	0.0143827	0.0253492	0.0343418	0.0292539	0.0316473	0.0244779	0.0213337	0.0122617	0.0296483	0.0258196	2.41796	0.870864	1.27379	-0.199481	0.00395922	0.38045	Not Detected	Not Detected	Not Detected	Not Detected	Not Detected	Not Detected	Not Detected	Not Detected	Not Detected	3	3	3	FALSE	A_30_P01020100	chr2:116802549-116803286_R										lincRNA:chr2:116802549-116803286 reverse strand	chr2:116802710-116802651	mm|2qE5
726	A_30_P01020104	0.255866	0.232794	0.275848	0.105206	0.0661922	0.0581392	0.0712417	0.0620419	0.0833056	0.254836	0.0765126	0.0721964	0.300242	0.943588	-1.7358	-0.0837703	0.015354	0.884328	Detected	Detected	Detected	Not Detected	Not Detected	Not Detected	Not Detected	Not Detected	Not Detected	0	3	3	FALSE	A_30_P01020104	chr3:30059174-30060808_R										lincRNA:chr3:30059174-30060808 reverse strand	chr3:30059349-30059290	mm|3qA3
727	A_30_P01020106	0.0110028	0.0195059	0.0207784	0.0278096	0.040999	0.0251124	0.019792	0.0359689	0.0674219	0.0170957	0.031307	0.0410609	1.83128	1.31156	0.872854	0.391281	0.0747159	0.687511	Not Detected	Not Detected	Not Detected	Not Detected	Not Detected	Not Detected	Not Detected	Not Detected	Not Detected	3	3	3	FALSE	A_30_P01020106	chr2:27628702-27628903_R										lincRNA:chr2:27628702-27628903 reverse strand	chr2:27628849-27628790	mm|2qA3
728	A_30_P01020107	0.0097049	0.00828053	0.00833329	0.017667	0.023502	0.022245	0.017647	0.0203774	0.0151513	0.00877291	0.021138	0.0177252	2.40947	0.838548	1.26871	-0.254035	0.00240245	0.223756	Not Detected	Not Detected	Not Detected	Not Detected	Not Detected	Not Detected	Not Detected	Not Detected	Not Detected	3	3	3	FALSE	A_30_P01020107	chr17:7793350-7871100_F										lincRNA:chr17:7793350-7871100 forward strand	chr17:7823844-7823903	mm|17qA1
729	A_30_P01020110	0.049958	0.0358835	0.0616574	0.0551674	0.0672785	0.0335506	0.0334657	0.0627714	0.0301308	0.0491663	0.0519989	0.0421226	1.05761	0.810069	0.0808099	-0.303884	0.886459	0.505949	Not Detected	Not Detected	Detected	Not Detected	Not Detected	Not Detected	Not Detected	Not Detected	Not Detected	2	3	3	FALSE	A_30_P01020110	chr5:110424250-110443025_R										lincRNA:chr5:110424250-110443025 reverse strand	chr5:110425609-110425550	mm|5qF
730	A_30_P01020112	0.301248	0.29235	0.213161	0.561104	0.485296	0.455353	0.259009	0.339877	0.217338	0.26892	0.500584	0.272075	1.86146	0.543514	0.896437	-0.87961	0.0140976	0.025103	Detected	Detected	Detected	Detected	Detected	Detected	Detected	Detected	Detected	0	0	0	FALSE	A_30_P01020112	chr1:88398169-88398354_F										lincRNA:chr1:88398169-88398354 forward strand	chr1:88398204-88398263	mm|1qD
731	A_30_P01020118	0.00985294	0.00839222	0.0084925	0.018133	0.0241567	0.0227929	0.018072	0.0211009	0.0156854	0.00891255	0.0216942	0.0182861	2.43412	0.842902	1.2834	-0.246563	0.00235191	0.235685	Not Detected	Not Detected	Not Detected	Not Detected	Not Detected	Not Detected	Not Detected	Not Detected	Not Detected	3	3	3	FALSE	A_30_P01020118	chr4:128727332-128735227_F										lincRNA:chr4:128727332-128735227 forward strand	chr4:128731800-128731859	mm|4qD2.2
732	A_30_P01020122	0.0109142	0.0100178	0.00928891	0.0198429	0.0263909	0.0245983	0.0196072	0.0224808	0.0167091	0.0100736	0.0236107	0.019599	2.34381	0.830091	1.22886	-0.268659	0.00289044	0.199221	Not Detected	Not Detected	Not Detected	Not Detected	Not Detected	Not Detected	Not Detected	Not Detected	Not Detected	3	3	3	FALSE	A_30_P01020122	chr8:50456266-50587338_F										lincRNA:chr8:50456266-50587338 forward strand	chr8:50548599-50548658	mm|8qB1.2
733	A_30_P01020124	0.0115115	0.0097893	0.0263644	0.0496923	0.027504	0.0390967	0.0203761	0.0596137	0.0176931	0.0158884	0.0387643	0.032561	2.43979	0.839973	1.28676	-0.251586	0.0678245	0.526179	Not Detected	Not Detected	Not Detected	Not Detected	Not Detected	Not Detected	Not Detected	Not Detected	Not Detected	3	3	3	FALSE	A_30_P01020124	chr15:96984422-97000322_R										lincRNA:chr15:96984422-97000322 reverse strand	chr15:96990690-96990631	mm|15qF1
734	A_30_P01020127	0.0131833	0.0112012	0.0235662	0.0238132	0.0323652	0.030281	0.0234742	0.0273091	0.0204401	0.0159836	0.0288198	0.0237411	1.80309	0.823779	0.850472	-0.279671	0.0910037	0.200063	Not Detected	Not Detected	Not Detected	Not Detected	Not Detected	Not Detected	Not Detected	Not Detected	Not Detected	3	3	3	FALSE	A_30_P01020127	chr11:69193873-69194307_F										lincRNA:chr11:69193873-69194307 forward strand	chr11:69194185-69194244	mm|11qB3
735	A_30_P01020128	215.191	183.756	183.738	343.6	277.636	260.131	229.03	278.282	279.308	194.228	293.789	262.207	1.51259	0.8925	0.597026	-0.164075	0.0206363	0.360752	Detected	Detected	Detected	Detected	Detected	Detected	Detected	Detected	Detected	0	0	0	FALSE	A_30_P01020128	chr4:141527564-141547339_F										lincRNA:chr4:141527564-141547339 forward strand	chr4:141532840-141532899	mm|4qE1
736	A_30_P01020139	0.0103964	0.00896921	0.00903802	0.0194085	0.0255584	0.0244109	0.019314	0.022163	0.0161104	0.00946787	0.0231259	0.0191958	2.44257	0.830053	1.2884	-0.268724	0.00229608	0.209947	Not Detected	Not Detected	Not Detected	Not Detected	Not Detected	Not Detected	Not Detected	Not Detected	Not Detected	3	3	3	FALSE	A_30_P01020139	chr1:152001112-152012796_R										lincRNA:chr1:152001112-152012796 reverse strand	chr1:152007845-152007786	mm|1qG1
737	A_30_P01020141	0.0119138	0.0100869	0.010095	0.0217133	0.0284149	0.253745	0.0209998	0.024239	0.0181447	0.0106985	0.101291	0.0211278	9.46774	0.208585	3.24302	-2.26129	0.172301	0.349101	Not Detected	Not Detected	Not Detected	Not Detected	Not Detected	Detected	Not Detected	Not Detected	Not Detected	3	2	3	FALSE	A_30_P01020141	chr2:10237649-10287591_F										lincRNA:chr2:10237649-10287591 forward strand	chr2:10285042-10285101	mm|2qA1
738	A_30_P01020142	0.0474478	0.0483865	0.0479427	0.0696295	0.0553404	0.027035	0.0341443	0.0550268	0.049847	0.0479257	0.0506683	0.0463394	1.05723	0.914564	0.0802839	-0.128844	0.954518	0.91873	Not Detected	Detected	Detected	Not Detected	Not Detected	Not Detected	Not Detected	Not Detected	Not Detected	1	3	3	FALSE	A_30_P01020142	chr4:98943050-98959998_F										lincRNA:chr4:98943050-98959998 forward strand	chr4:98946771-98946830	mm|4qC6
739	A_30_P01020149	0.36346	0.385973	0.425653	0.597586	0.579367	0.562785	0.756025	0.7432	0.564834	0.391695	0.579913	0.68802	1.48052	1.18642	0.566104	0.246613	0.00708646	0.224584	Detected	Detected	Detected	Detected	Detected	Detected	Detected	Detected	Detected	0	0	0	FALSE	A_30_P01020149	chr2:77807600-77836075_F										lincRNA:chr2:77807600-77836075 forward strand	chr2:77819299-77819358	mm|2qC3
740	A_30_P01020154	0.296236	0.304171	0.33289	0.342844	0.281137	0.288336	0.446741	0.264295	0.224422	0.311099	0.304106	0.311819	0.977521	1.02536	-0.0327998	0.0361371	0.744983	0.947333	Detected	Detected	Detected	Detected	Detected	Detected	Detected	Detected	Detected	0	0	0	FALSE	A_30_P01020154	chr9:51905865-51911474_F										lincRNA:chr9:51905865-51911474 forward strand	chr9:51911370-51911429	mm|9qA5.3
741	A_30_P01020155	0.106324	0.078909	0.0792798	0.0483041	0.0246296	0.0282425	0.042719	0.0218041	0.0402909	0.0881708	0.0337254	0.034938	0.382501	1.03595	-1.38647	0.0509612	0.0242627	0.907392	Detected	Detected	Detected	Not Detected	Not Detected	Not Detected	Not Detected	Not Detected	Not Detected	0	3	3	FALSE	A_30_P01020155	chr7:140018492-140019064_R										lincRNA:chr7:140018492-140019064 reverse strand	chr7:140018983-140018924	mm|7qF3
742	A_30_P01020159	0.0146111	0.00820094	0.008497	0.0175747	0.0234114	0.0221923	0.0175809	0.0204465	0.0151854	0.0104363	0.0210595	0.0177376	2.0179	0.842263	1.01285	-0.247657	0.0417214	0.235704	Not Detected	Not Detected	Not Detected	Not Detected	Not Detected	Not Detected	Not Detected	Not Detected	Not Detected	3	3	3	FALSE	A_30_P01020159	chr11:6796679-6797670_F										lincRNA:chr11:6796679-6797670 forward strand	chr11:6796683-6796742	mm|11qA1
743	A_30_P01020163	2.46776	2.2746	2.32182	3.83939	5.66587	4.64278	4.88388	5.01632	6.59457	2.35473	4.71601	5.49826	2.00278	1.16587	1.00201	0.221406	0.0219186	0.350298	Detected	Detected	Detected	Detected	Detected	Detected	Detected	Detected	Detected	0	0	0	FALSE	A_30_P01020163	chrX:157038750-157039018_F										lincRNA:chrX:157038750-157039018 forward strand	chrX:157038772-157038831	mm|XqF4
744	A_30_P01020168	0.0176029	0.0237386	0.0316687	0.0501811	0.0240405	0.0226703	0.035903	0.0268821	0.0154221	0.0243368	0.0322973	0.0260691	1.3271	0.80716	0.408276	-0.309074	0.480524	0.599557	Not Detected	Not Detected	Not Detected	Not Detected	Not Detected	Not Detected	Not Detected	Not Detected	Not Detected	3	3	3	FALSE	A_30_P01020168	chr14:70483555-70484159_F										lincRNA:chr14:70483555-70484159 forward strand	chr14:70484011-70484070	mm|14qD2
745	A_30_P01020169	0.923908	0.914407	0.890532	2.47395	2.26959	1.49097	1.81926	1.55585	1.38436	0.909615	2.07817	1.58649	2.28467	0.763407	1.19199	-0.389476	0.0353432	0.24573	Detected	Detected	Detected	Detected	Detected	Detected	Detected	Detected	Detected	0	0	0	FALSE	A_30_P01020169	chr10:117021051-117038683_R										lincRNA:chr10:117021051-117038683 reverse strand	chr10:117032073-117032014	mm|10qD2
746	A_30_P01020170	0.0105472	0.0090767	0.0134805	0.0361444	0.0255416	0.0242332	0.0190965	0.0221946	0.0165905	0.0110348	0.0286397	0.0192939	2.5954	0.673674	1.37596	-0.569877	0.00515728	0.0718272	Not Detected	Not Detected	Not Detected	Not Detected	Not Detected	Not Detected	Not Detected	Not Detected	Not Detected	3	3	3	FALSE	A_30_P01020170	chr3:45081952-45092352_F										lincRNA:chr3:45081952-45092352 forward strand	chr3:45085266-45085325	mm|3qB
747	A_30_P01020171	0.0418895	0.0486507	0.0458128	0.0767251	0.109491	0.0294951	0.108284	0.0449868	0.117341	0.045451	0.0719037	0.0902039	1.58201	1.25451	0.661755	0.327124	0.493996	0.607019	Not Detected	Not Detected	Not Detected	Not Detected	Not Detected	Not Detected	Detected	Not Detected	Detected	3	3	1	FALSE	A_30_P01020171	chr14:65720392-65769859_R										lincRNA:chr14:65720392-65769859 reverse strand
748	A_30_P01020173	0.0096729	0.00825347	0.00834249	0.0177758	0.0236856	0.0224098	0.0177592	0.0206976	0.0153631	0.00875629	0.0212904	0.01794	2.43144	0.842631	1.28181	-0.247026	0.00244107	0.236665	Not Detected	Not Detected	Not Detected	Not Detected	Not Detected	Not Detected	Not Detected	Not Detected	Not Detected	3	3	3	FALSE	A_30_P01020173	chr16:38043218-38088355_R										lincRNA:chr16:38043218-38088355 reverse strand	chr16:38058681-38058622	mm|16qB3
749	A_30_P01020178	0.0438783	0.0290891	0.027986	0.0576623	0.0575386	0.0228961	0.0304114	0.0536302	0.0236546	0.0336511	0.0460323	0.0358987	1.36793	0.779859	0.451992	-0.358714	0.515371	0.596433	Not Detected	Not Detected	Not Detected	Not Detected	Not Detected	Not Detected	Not Detected	Not Detected	Not Detected	3	3	3	FALSE	A_30_P01020178	chr5:137411861-137413010_F										lincRNA:chr5:137411861-137413010 forward strand	chr5:137412935-137412994	mm|5qG2
750	A_30_P01020182	0.0206233	0.0392563	0.0284705	0.0548123	0.0624492	0.0346092	0.0901899	0.0227093	0.0435064	0.02945	0.0506236	0.0521352	1.71897	1.02986	0.781541	0.0424487	0.10203	0.842903	Not Detected	Not Detected	Not Detected	Not Detected	Not Detected	Not Detected	Not Detected	Not Detected	Not Detected	3	3	3	FALSE	A_30_P01020182	chr18:79286360-79304510_F										lincRNA:chr18:79286360-79304510 forward strand	chr18:79303620-79303679	mm|18qE3
751	A_30_P01020184	0.0212858	0.0327951	0.0355785	0.0544219	0.0310553	0.0353239	0.0791181	0.0595202	0.0648307	0.0298864	0.040267	0.067823	1.34733	1.68433	0.430108	0.752175	0.277777	0.0657758	Not Detected	Not Detected	Not Detected	Not Detected	Not Detected	Not Detected	Not Detected	Not Detected	Not Detected	3	3	3	FALSE	A_30_P01020184	chr1:121971906-121988306_F										lincRNA:chr1:121971906-121988306 forward strand	chr1:121984862-121984921	mm|1qE2.3
752	A_30_P01020195	0.011896	0.0100758	0.0100809	0.0216809	0.0283807	0.174262	0.0209736	0.0242021	0.0181202	0.0106842	0.0747746	0.0210986	6.99859	0.282163	2.80706	-1.8254	0.148775	0.337091	Not Detected	Not Detected	Not Detected	Not Detected	Not Detected	Detected	Not Detected	Not Detected	Not Detected	3	2	3	FALSE	A_30_P01020195	chrX:100756245-100819095_R										lincRNA:chrX:100756245-100819095 reverse strand	chrX:100756346-100756287	mm|XqD
753	A_30_P01020196	0.0314693	0.037478	0.0285506	0.0555276	0.0994277	0.0736284	0.0741046	0.0699749	0.0652991	0.0324993	0.0761946	0.0697929	2.3445	0.915982	1.22928	-0.126608	0.0232887	0.754629	Not Detected	Not Detected	Not Detected	Not Detected	Not Detected	Not Detected	Not Detected	Not Detected	Not Detected	3	3	3	FALSE	A_30_P01020196	chr18:35967933-35986564_R										lincRNA:chr18:35967933-35986564 reverse strand
754	A_30_P01020197	0.0125757	0.0116047	0.0122452	0.0229245	0.17934	0.0289377	0.0236573	0.0263892	0.0198284	0.0121419	0.0770676	0.0232916	6.34725	0.302224	2.66613	-1.72631	0.164155	0.365723	Not Detected	Not Detected	Not Detected	Not Detected	Detected	Not Detected	Not Detected	Not Detected	Not Detected	3	2	3	FALSE	A_30_P01020197	chr1:152001112-152012796_F										lincRNA:chr1:152001112-152012796 forward strand	chr1:152007809-152007868	mm|1qG1
755	A_30_P01020200	0.0105691	0.00897297	0.00900628	0.0197591	0.0252457	0.0266771	0.0672948	0.0273731	0.0162564	0.00951612	0.023894	0.0369748	2.5109	1.54745	1.3282	0.629895	0.00252403	0.584647	Not Detected	Not Detected	Not Detected	Not Detected	Not Detected	Not Detected	Not Detected	Not Detected	Not Detected	3	3	3	FALSE	A_30_P01020200	chrX:120819096-120820227_R										lincRNA:chrX:120819096-120820227 reverse strand	chrX:120819964-120819905	mm|XqE3
756	A_30_P01020201	0.0256467	0.0407458	0.0204041	0.0393467	0.0280736	0.0266134	0.0209711	0.0637382	0.0495414	0.0289322	0.0313446	0.0447503	1.08338	1.42769	0.115541	0.513679	0.680222	0.514013	Not Detected	Not Detected	Not Detected	Not Detected	Not Detected	Not Detected	Not Detected	Not Detected	Not Detected	3	3	3	FALSE	A_30_P01020201	chr2:25774411-25783757_F										lincRNA:chr2:25774411-25783757 forward strand	chr2:25783698-25783757	mm|2qA3
757	A_30_P01020208	0.208908	0.212397	0.169044	0.237054	0.0612973	0.124806	0.0635784	0.172914	0.155613	0.196783	0.141053	0.130702	0.716792	0.926619	-0.480373	-0.109953	0.349031	0.971103	Detected	Detected	Detected	Detected	Not Detected	Detected	Not Detected	Detected	Detected	0	1	1	FALSE	A_30_P01020208	chr8:70603786-70604243_R										lincRNA:chr8:70603786-70604243 reverse strand	chr8:70603982-70603923	mm|8qB3.3
758	A_30_P01020209	0.248527	0.245082	0.236542	0.552763	0.332015	0.306685	0.227846	0.296051	0.292752	0.243384	0.397154	0.272216	1.6318	0.685417	0.706466	-0.544946	0.132086	0.190375	Detected	Detected	Detected	Detected	Detected	Detected	Detected	Detected	Detected	0	0	0	FALSE	A_30_P01020209	chr18:5119300-5181600_R										lincRNA:chr18:5119300-5181600 reverse strand	chr18:5160570-5160511	mm|18qA1
759	A_30_P01020212	0.239174	0.248075	0.343337	0.534696	0.644571	0.580702	0.625841	0.710726	0.533289	0.276862	0.586656	0.623285	2.11895	1.06244	1.08335	0.0873771	0.0107865	0.603031	Detected	Detected	Detected	Detected	Detected	Detected	Detected	Detected	Detected	0	0	0	FALSE	A_30_P01020212	chr17:15357376-15385701_R										lincRNA:chr17:15357376-15385701 reverse strand	chr17:15368372-15368313	mm|17qA2
760	A_30_P01020215	0.0698162	0.0441631	0.0403917	0.0293248	0.0260931	0.0238855	0.0189101	0.0362904	0.0156634	0.051457	0.0264345	0.0236213	0.513719	0.89358	-0.960947	-0.162332	0.0509095	0.562233	Detected	Detected	Not Detected	Not Detected	Not Detected	Not Detected	Not Detected	Not Detected	Not Detected	1	3	3	FALSE	A_30_P01020215	chr16:44720170-44723911_R										lincRNA:chr16:44720170-44723911 reverse strand	chr16:44720290-44720231	mm|16qB4
761	A_30_P01020217	0.0109962	0.00887891	0.00890393	0.057795	0.0669465	0.0236752	0.018656	0.116656	0.0259655	0.00959302	0.0494722	0.0537593	5.15711	1.08666	2.36656	0.119896	0.0359559	0.819663	Not Detected	Not Detected	Not Detected	Not Detected	Not Detected	Not Detected	Not Detected	Detected	Not Detected	3	3	2	FALSE	A_30_P01020217	chr15:12122307-12122758_F										lincRNA:chr15:12122307-12122758 forward strand	chr15:12122428-12122487	mm|15qA1
762	A_30_P01020218	0.0127815	0.0305499	0.0399602	0.0504055	0.0323532	0.0433112	0.0385261	0.0459089	0.0468544	0.0277639	0.0420233	0.0437631	1.5136	1.0414	0.59798	0.0585268	0.27888	0.73735	Not Detected	Not Detected	Not Detected	Not Detected	Not Detected	Not Detected	Not Detected	Not Detected	Not Detected	3	3	3	FALSE	A_30_P01020218	chr10:83364590-83364873_F										lincRNA:chr10:83364590-83364873 forward strand	chr10:83364754-83364813	mm|10qC1
763	A_30_P01020219	0.217387	0.204056	0.172108	0.07758	0.0316977	0.0295495	0.0711446	0.0271554	0.109358	0.19785	0.0462757	0.0692194	0.233892	1.4958	-2.09608	0.580922	0.0326348	0.531043	Detected	Detected	Detected	Not Detected	Not Detected	Not Detected	Not Detected	Not Detected	Detected	0	3	2	FALSE	A_30_P01020219	chr15:43363046-43364763_F										lincRNA:chr15:43363046-43364763 forward strand	chr15:43364262-43364321	mm|15qB3.2
764	A_30_P01020220	0.103771	0.088471	0.0899097	0.0872805	0.0726359	0.0368451	0.0234985	0.0221727	0.0535458	0.0940504	0.0655872	0.0330723	0.697362	0.50425	-0.520021	-0.987789	0.247369	0.141735	Detected	Detected	Detected	Not Detected	Not Detected	Not Detected	Not Detected	Not Detected	Not Detected	0	3	3	FALSE	A_30_P01020220	chr2:175908275-175927625_F										lincRNA:chr2:175908275-175927625 forward strand	chr2:175918530-175918589	mm|2qH4
765	A_30_P01020227	0.0101958	0.00870871	0.00873267	0.0184975	0.0382254	0.0231209	0.0183079	0.0211615	0.0158451	0.0092124	0.0266146	0.0184382	2.889	0.692785	1.53057	-0.529521	0.0356276	0.264648	Not Detected	Not Detected	Not Detected	Not Detected	Not Detected	Not Detected	Not Detected	Not Detected	Not Detected	3	3	3	FALSE	A_30_P01020227	chr13:28898970-28901714_R										lincRNA:chr13:28898970-28901714 reverse strand	chr13:28899293-28899234	mm|13qA3.1
766	A_30_P01020231	0.0242508	0.018061	0.018698	0.0186198	0.0244814	0.02316	0.0182884	0.0433762	0.0346626	0.0203366	0.0220871	0.0321091	1.08608	1.45375	0.119125	0.539779	0.535832	0.34334	Not Detected	Not Detected	Not Detected	Not Detected	Not Detected	Not Detected	Not Detected	Not Detected	Not Detected	3	3	3	FALSE	A_30_P01020231	chr11:79531768-79532127_F										lincRNA:chr11:79531768-79532127 forward strand	chr11:79531928-79531987	mm|11qB5
767	A_30_P01020233	0.0314282	0.039296	0.0219636	0.0737664	0.0812145	0.0827889	0.0582971	0.1514	0.0497504	0.030896	0.0792566	0.0864825	2.56527	1.09117	1.35911	0.125877	0.025127	0.91792	Not Detected	Not Detected	Not Detected	Not Detected	Not Detected	Not Detected	Not Detected	Detected	Not Detected	3	3	2	FALSE	A_30_P01020233	chr18:47690173-47697423_R										lincRNA:chr18:47690173-47697423 reverse strand	chr18:47694260-47694201	mm|18qC
768	A_30_P01020234	0.0114056	0.0095901	0.00966442	0.0206428	0.0432246	0.0252756	0.0201654	0.0231704	0.0173949	0.01022	0.0297143	0.0202436	2.90746	0.681273	1.53976	-0.553696	0.0367404	0.259244	Not Detected	Not Detected	Not Detected	Not Detected	Not Detected	Not Detected	Not Detected	Not Detected	Not Detected	3	3	3	FALSE	A_30_P01020234	chr3:93159107-93159613_F										lincRNA:chr3:93159107-93159613 forward strand	chr3:93159500-93159559	mm|3qF2.1
769	A_30_P01020239	0.0126919	0.0107201	0.0108612	0.0231282	0.180775	0.0287406	0.0224497	0.0265196	0.0200377	0.0114244	0.0775478	0.0230023	6.78793	0.296622	2.76297	-1.7533	0.152672	0.358984	Not Detected	Not Detected	Not Detected	Not Detected	Detected	Not Detected	Not Detected	Not Detected	Not Detected	3	2	3	FALSE	A_30_P01020239	chr9:65368908-65377592_R										lincRNA:chr9:65368908-65377592 reverse strand	chr9:65369029-65368970	mm|9qC
770	A_30_P01020245	0.181229	0.151966	0.223602	0.32348	0.225824	0.155904	0.130035	0.221917	0.131368	0.185599	0.23507	0.161107	1.26655	0.685357	0.340899	-0.545072	0.452495	0.255091	Detected	Detected	Detected	Detected	Detected	Detected	Detected	Detected	Detected	0	0	0	FALSE	A_30_P01020245	chr5:143196275-143207575_F										lincRNA:chr5:143196275-143207575 forward strand	chr5:143203966-143204025	mm|5qG2
771	A_30_P01020246	0.0112165	0.00953104	0.00966337	0.0205207	0.0272384	2.02704	0.0200747	0.0237322	0.0178832	0.010137	0.691601	0.0205634	68.2257	0.029733	6.09224	-5.07179	0.256852	0.387096	Not Detected	Not Detected	Not Detected	Not Detected	Not Detected	Detected	Not Detected	Not Detected	Not Detected	3	2	3	FALSE	A_30_P01020246	chr17:26911397-26917047_R										lincRNA:chr17:26911397-26917047 reverse strand
772	A_30_P01020249	0.0144034	0.0141047	0.0319294	0.0224733	0.036597	0.0272121	0.0280228	0.0249013	0.038853	0.0201458	0.0287608	0.0305924	1.42763	1.06368	0.513622	0.0890688	0.266716	0.758948	Not Detected	Not Detected	Not Detected	Not Detected	Not Detected	Not Detected	Not Detected	Not Detected	Not Detected	3	3	3	FALSE	A_30_P01020249	chr7:149108190-149123890_F										lincRNA:chr7:149108190-149123890 forward strand	chr7:149112817-149112876	mm|7qF5
773	A_30_P01020259	0.020509	0.0365886	0.0362722	0.0647176	0.0496923	0.05813	0.0528608	0.0662314	0.0338149	0.0311233	0.0575133	0.050969	1.84792	0.886212	0.885901	-0.174275	0.0629925	0.53171	Not Detected	Not Detected	Not Detected	Not Detected	Not Detected	Not Detected	Not Detected	Not Detected	Not Detected	3	3	3	FALSE	A_30_P01020259	chr12:73838608-73862621_F										lincRNA:chr12:73838608-73862621 forward strand	chr12:73847987-73848046	mm|12qC3
774	A_30_P01020264	1.18797	1.26039	1.21345	1.40092	1.62994	1.65258	1.61905	1.41811	1.53792	1.22061	1.56115	1.52502	1.279	0.97686	0.355011	-0.0337762	0.0338633	0.753787	Detected	Detected	Detected	Detected	Detected	Detected	Detected	Detected	Detected	0	0	0	FALSE	A_30_P01020264	chr17:95255725-95272425_R										lincRNA:chr17:95255725-95272425 reverse strand	chr17:95257908-95257849	mm|17qE5
775	A_30_P01020272	0.0118479	0.00998677	0.0101063	0.0217166	0.028919	0.0269344	0.021192	0.0249549	0.0188367	0.010647	0.0258567	0.0216612	2.42854	0.837741	1.28009	-0.255425	0.00197739	0.21112	Not Detected	Not Detected	Not Detected	Not Detected	Not Detected	Not Detected	Not Detected	Not Detected	Not Detected	3	3	3	FALSE	A_30_P01020272	chr15:33980641-33981135_F										lincRNA:chr15:33980641-33981135 forward strand	chr15:33980655-33980714	mm|15qB3.1
776	A_30_P01020277	0.473785	0.555841	0.728137	0.704742	0.463026	0.537923	0.616513	0.720025	0.486939	0.585921	0.568564	0.607826	0.970376	1.06905	-0.0433842	0.0963357	0.874883	0.69994	Detected	Detected	Detected	Detected	Detected	Detected	Detected	Detected	Detected	0	0	0	FALSE	A_30_P01020277	chr17:8025086-8026227_R										lincRNA:chr17:8025086-8026227 reverse strand	chr17:8025287-8025228	mm|17qA1
777	A_30_P01020292	0.0167344	0.0330215	0.0380072	0.0274507	0.0239963	0.0240192	0.0217754	0.0207117	0.0259635	0.0292544	0.0251554	0.0228169	0.859887	0.907036	-0.217782	-0.140768	0.746901	0.297308	Not Detected	Not Detected	Not Detected	Not Detected	Not Detected	Not Detected	Not Detected	Not Detected	Not Detected	3	3	3	FALSE	A_30_P01020292	chr17:29380426-29380827_R										lincRNA:chr17:29380426-29380827 reverse strand	chr17:29380603-29380544	mm|17qA3.3
778	A_30_P01020294	0.0127051	0.0107791	0.0109269	0.0236606	0.0314695	0.0295108	0.0234936	0.0266016	0.0199214	0.0114704	0.0282136	0.0233388	2.4597	0.827219	1.29848	-0.273659	0.00205468	0.190681	Not Detected	Not Detected	Not Detected	Not Detected	Not Detected	Not Detected	Not Detected	Not Detected	Not Detected	3	3	3	FALSE	A_30_P01020294	chr12:110896603-110940553_F										lincRNA:chr12:110896603-110940553 forward strand	chr12:110923171-110923230	mm|12qF1
779	A_30_P01020298	2.91266	2.42328	2.33641	8.93383	7.49916	6.91438	5.33431	6.38581	4.66594	2.55745	7.78246	5.46202	3.04305	0.701837	1.60552	-0.510792	0.000422539	0.0410209	Detected	Detected	Detected	Detected	Detected	Detected	Detected	Detected	Detected	0	0	0	FALSE	A_30_P01020298	chr15:78404840-78412046_R										lincRNA:chr15:78404840-78412046 reverse strand	chr15:78412033-78411974	mm|15qE1
780	A_30_P01020300	0.032229	0.0257327	0.0522074	0.0290886	0.0541764	0.0379199	0.0484847	0.0630542	0.0631699	0.036723	0.040395	0.0582363	1.09999	1.44167	0.137491	0.527742	0.717104	0.149345	Not Detected	Not Detected	Detected	Not Detected	Not Detected	Not Detected	Not Detected	Not Detected	Not Detected	2	3	3	FALSE	A_30_P01020300	chr9:37063322-37063718_F										lincRNA:chr9:37063322-37063718 forward strand	chr9:37063490-37063549	mm|9qA4
781	A_30_P01020301	0.597878	0.808823	0.68854	0.454662	0.821278	0.933412	1.01286	1.09699	0.879509	0.698414	0.736451	0.996455	1.05446	1.35305	0.0765075	0.436215	0.953549	0.257346	Detected	Detected	Detected	Detected	Detected	Detected	Detected	Detected	Detected	0	0	0	FALSE	A_30_P01020301	chr14:103751075-103769725_F										lincRNA:chr14:103751075-103769725 forward strand	chr14:103759457-103759516	mm|14qE2.3
782	A_30_P01020306	46.4637	49.3494	44.5915	27.8172	32.1481	41.1559	44.3225	34.4722	40.5519	46.8016	33.7071	39.7822	0.720213	1.18023	-0.473505	0.239072	0.0884444	0.281618	Detected	Detected	Detected	Detected	Detected	Detected	Detected	Detected	Detected	0	0	0	FALSE	A_30_P01020306	chr14:22267795-22319045_F										lincRNA:chr14:22267795-22319045 forward strand
783	A_30_P01020307	0.124995	0.100086	0.127475	0.337129	0.207084	0.147172	0.224201	0.305872	0.0985215	0.117519	0.230462	0.209532	1.96106	0.909182	0.971637	-0.137359	0.111812	0.754866	Detected	Detected	Detected	Detected	Detected	Detected	Detected	Detected	Detected	0	0	0	FALSE	A_30_P01020307	chr15:85298353-85298992_F										lincRNA:chr15:85298353-85298992 forward strand	chr15:85298793-85298852	mm|15qE2
784	A_30_P01020310	0.13998	0.152013	0.121458	0.198018	0.195754	0.233775	0.12092	0.27312	0.0885802	0.137817	0.209183	0.160873	1.51783	0.769056	0.602011	-0.378839	0.00901719	0.378297	Detected	Detected	Detected	Detected	Detected	Detected	Detected	Detected	Detected	0	0	0	FALSE	A_30_P01020310	chr13:78341864-78375825_F										lincRNA:chr13:78341864-78375825 forward strand	chr13:78343047-78343106	mm|13qC1
785	A_30_P01020313	0.0123459	0.0203881	0.0232572	0.0225117	0.0300878	0.0284076	0.0222977	0.0259123	0.0194623	0.0186637	0.0270023	0.0225574	1.44678	0.835388	0.53285	-0.259482	0.164798	0.214116	Not Detected	Not Detected	Not Detected	Not Detected	Not Detected	Not Detected	Not Detected	Not Detected	Not Detected	3	3	3	FALSE	A_30_P01020313	chr13:38757503-38767928_F										lincRNA:chr13:38757503-38767928 forward strand	chr13:38766219-38766278	mm|13qA3.3
786	A_30_P01020314	0.483822	0.468987	0.465746	0.527882	0.404912	0.339603	0.482976	0.336218	0.344208	0.472852	0.424132	0.387801	0.896967	0.914339	-0.156873	-0.129199	0.431904	0.642321	Detected	Detected	Detected	Detected	Detected	Detected	Detected	Detected	Detected	0	0	0	FALSE	A_30_P01020314	chr2:168606645-168621395_R										lincRNA:chr2:168606645-168621395 reverse strand	chr2:168614536-168614477	mm|2qH3
787	A_30_P01020315	1.31199	1.3902	1.24331	1.45245	0.679595	0.762558	0.645499	0.615267	0.814205	1.31517	0.964866	0.691657	0.733645	0.716842	-0.446845	-0.480273	0.258828	0.358126	Detected	Detected	Detected	Detected	Detected	Detected	Detected	Detected	Detected	0	0	0	FALSE	A_30_P01020315	chr9:13349094-13352732_F										lincRNA:chr9:13349094-13352732 forward strand	chr9:13352536-13352595	mm|9qA1
788	A_30_P01020319	0.177385	0.163769	0.240149	0.270467	0.317372	0.30892	0.266135	0.551764	0.320797	0.193768	0.29892	0.379565	1.54267	1.26979	0.625432	0.344589	0.0461722	0.475605	Detected	Detected	Detected	Detected	Detected	Detected	Detected	Detected	Detected	0	0	0	FALSE	A_30_P01020319	chr9:70017793-70045355_F										lincRNA:chr9:70017793-70045355 forward strand	chr9:70039824-70039883	mm|9qD
789	A_30_P01020328	0.0391542	0.0197915	0.017017	0.0241212	0.0320572	0.029981	0.0238376	0.0271031	0.0208339	0.0253209	0.0287198	0.0239248	1.13423	0.833044	0.181715	-0.263536	0.54691	0.190075	Not Detected	Not Detected	Not Detected	Not Detected	Not Detected	Not Detected	Not Detected	Not Detected	Not Detected	3	3	3	FALSE	A_30_P01020328	chr18:84737058-84737644_F										lincRNA:chr18:84737058-84737644 forward strand	chr18:84737207-84737266	mm|18qE4
790	A_30_P01020334	0.0228134	0.00826416	0.018962	0.0194618	0.0238218	0.0226348	0.048213	0.0206752	0.0232631	0.0166799	0.0219728	0.0307171	1.31732	1.39796	0.397611	0.483322	0.369233	0.424742	Not Detected	Not Detected	Not Detected	Not Detected	Not Detected	Not Detected	Not Detected	Not Detected	Not Detected	3	3	3	FALSE	A_30_P01020334	chr13:23488256-23488626_F										lincRNA:chr13:23488256-23488626 forward strand	chr13:23488486-23488545	mm|13qA3.1
791	A_30_P01020340	0.0900591	0.0865791	0.0731427	0.133554	0.123985	0.185629	0.134935	0.153831	0.156529	0.0832603	0.147722	0.148432	1.77422	1.0048	0.827188	0.00690951	0.0277151	0.899292	Detected	Detected	Detected	Detected	Detected	Detected	Detected	Detected	Detected	0	0	0	FALSE	A_30_P01020340	chr9:121206619-121273344_F										lincRNA:chr9:121206619-121273344 forward strand	chr9:121206850-121206909	mm|9qF4
792	A_30_P01020342	0.0121237	0.0101782	0.0102691	0.0220231	0.0561775	0.101613	0.0214026	0.0246901	0.0184932	0.010857	0.0599378	0.0215286	5.52065	0.359183	2.46484	-1.47721	0.0727301	0.192434	Not Detected	Not Detected	Not Detected	Not Detected	Not Detected	Not Detected	Not Detected	Not Detected	Not Detected	3	3	3	FALSE	A_30_P01020342	chr4:63915086-63937637_R										lincRNA:chr4:63915086-63937637 reverse strand	chr4:63915942-63915883	mm|4qC1
793	A_30_P01020350	0.0121102	0.0104679	0.0103846	0.0250967	0.0292992	0.0276275	0.0407584	0.0597205	0.0191668	0.0109876	0.0273411	0.0398819	2.48837	1.45868	1.3152	0.544661	0.000182954	0.494596	Not Detected	Not Detected	Not Detected	Not Detected	Not Detected	Not Detected	Not Detected	Not Detected	Not Detected	3	3	3	FALSE	A_30_P01020350	chr13:111417495-111432841_F										lincRNA:chr13:111417495-111432841 forward strand	chr13:111417551-111417610	mm|13qD2.2
794	A_30_P01020354	0.0188418	0.0102612	0.0103259	0.0222206	0.0291114	0.0299266	0.0217173	0.0253364	0.0186273	0.013143	0.0270862	0.0218937	2.06089	0.808296	1.04327	-0.307044	0.0459873	0.178693	Not Detected	Not Detected	Not Detected	Not Detected	Not Detected	Not Detected	Not Detected	Not Detected	Not Detected	3	3	3	FALSE	A_30_P01020354	chr1:64232564-64349617_R										lincRNA:chr1:64232564-64349617 reverse strand	chr1:64232991-64232932	mm|1qC2
795	A_30_P01020356	0.525994	0.558196	0.641198	0.677109	0.739545	0.704163	0.894297	0.930555	0.683755	0.57513	0.706939	0.836202	1.22918	1.18285	0.297698	0.242266	0.053534	0.236947	Detected	Detected	Detected	Detected	Detected	Detected	Detected	Detected	Detected	0	0	0	FALSE	A_30_P01020356	chr15:38630866-38640611_F										lincRNA:chr15:38630866-38640611 forward strand	chr15:38633521-38633580	mm|15qB3.1
796	A_30_P01020358	0.0584303	0.0533009	0.0256225	0.279489	0.177097	0.170223	0.169676	0.156608	0.083822	0.0457845	0.208936	0.136702	4.56347	0.654276	2.19013	-0.612029	0.0115586	0.188133	Detected	Detected	Not Detected	Detected	Detected	Detected	Detected	Detected	Detected	1	0	0	FALSE	A_30_P01020358	chr7:3338500-3360725_R										lincRNA:chr7:3338500-3360725 reverse strand
797	A_30_P01020362	0.0847165	0.0827312	0.0966746	0.081018	0.10418	0.0493363	0.116281	0.133072	0.0409591	0.0880408	0.0781781	0.0967707	0.887976	1.23782	-0.171407	0.307805	0.53965	0.765808	Detected	Detected	Detected	Not Detected	Not Detected	Not Detected	Detected	Detected	Not Detected	0	3	1	FALSE	A_30_P01020362	chr12:4469975-4482792_F										lincRNA:chr12:4469975-4482792 forward strand	chr12:4482713-4482772	mm|12qA1.1
798	A_30_P01020366	0.0125974	0.0181849	0.0149771	0.0172651	0.0477315	0.0272661	0.031719	0.0200267	0.0146762	0.0152531	0.0307543	0.0221407	2.01626	0.719922	1.01168	-0.474088	0.156357	0.474859	Not Detected	Not Detected	Not Detected	Not Detected	Not Detected	Not Detected	Not Detected	Not Detected	Not Detected	3	3	3	FALSE	A_30_P01020366	chr16:44717531-44724206_F										lincRNA:chr16:44717531-44724206 forward strand	chr16:44723933-44723992	mm|16qB4
799	A_30_P01020367	0.624653	0.58725	0.550064	1.05251	0.848433	0.75843	0.716584	0.936721	0.656868	0.587322	0.886459	0.770057	1.50932	0.868689	0.593901	-0.203088	0.0388305	0.376362	Detected	Detected	Detected	Detected	Detected	Detected	Detected	Detected	Detected	0	0	0	FALSE	A_30_P01020367	chr14:77042348-77042645_R										lincRNA:chr14:77042348-77042645 reverse strand	chr14:77042543-77042484	mm|14qD3
800	A_30_P01020374	0.00985013	0.00837837	0.00846738	0.0180614	0.0241768	0.0227892	0.0181227	0.0207985	0.0152266	0.00889863	0.0216758	0.0180492	2.43586	0.83269	1.28443	-0.264149	0.00248802	0.221318	Not Detected	Not Detected	Not Detected	Not Detected	Not Detected	Not Detected	Not Detected	Not Detected	Not Detected	3	3	3	FALSE	A_30_P01020374	chr8:111766396-111772271_F										lincRNA:chr8:111766396-111772271 forward strand	chr8:111769377-111769436	mm|8qD3
801	A_30_P01020378	0.0385998	0.0390132	0.025992	0.0523519	0.0311241	0.040117	0.0905644	0.057379	0.108951	0.034535	0.0411976	0.0856316	1.19292	2.07856	0.254502	1.05558	0.443547	0.0441472	Not Detected	Not Detected	Not Detected	Not Detected	Not Detected	Not Detected	Not Detected	Not Detected	Detected	3	3	2	FALSE	A_30_P01020378	chr4:146889650-146904300_F										lincRNA:chr4:146889650-146904300 forward strand	chr4:146892846-146892905	mm|4qE1
802	A_30_P01020383	4.37613	3.53115	3.52658	15.9523	13.2921	13.3681	10.6463	12.4766	9.80136	3.81128	14.2042	10.9748	3.72687	0.772642	1.89797	-0.372127	0.000178901	0.0505132	Detected	Detected	Detected	Detected	Detected	Detected	Detected	Detected	Detected	0	0	0	FALSE	A_30_P01020383	chr6:47687025-47728525_F										lincRNA:chr6:47687025-47728525 forward strand	chr6:47690093-47690152	mm|6qB2.3
803	A_30_P01020385	0.424391	0.30959	0.398747	0.408326	0.22509	0.286458	0.265174	0.317931	0.356512	0.377576	0.306625	0.313206	0.812087	1.02146	-0.300293	0.0306376	0.327371	0.834285	Detected	Detected	Detected	Detected	Detected	Detected	Detected	Detected	Detected	0	0	0	FALSE	A_30_P01020385	chr18:38478632-38482159_F										lincRNA:chr18:38478632-38482159 forward strand	chr18:38482067-38482126	mm|18qB3
804	A_30_P01020390	0.27407	0.285166	0.279338	0.185394	0.154745	0.214216	0.138172	0.146813	0.16876	0.279525	0.184785	0.151249	0.661068	0.818512	-0.597129	-0.288925	0.0443396	0.167437	Detected	Detected	Detected	Detected	Detected	Detected	Detected	Detected	Detected	0	0	0	FALSE	A_30_P01020390	chr3:68867193-68876128_F										lincRNA:chr3:68867193-68876128 forward strand	chr3:68875111-68875170	mm|3qE1
805	A_30_P01020392	0.17454	0.195343	0.181906	0.253083	0.185626	0.141739	0.229949	0.178299	0.170289	0.18393	0.193483	0.192846	1.05194	0.996709	0.0730476	-0.00475548	0.901565	0.939342	Detected	Detected	Detected	Detected	Detected	Detected	Detected	Detected	Detected	0	0	0	FALSE	A_30_P01020392	chr11:76400207-76434732_R										lincRNA:chr11:76400207-76434732 reverse strand	chr11:76402769-76402710	mm|11qB5
806	A_30_P01020394	0.010445	0.0195559	0.0202761	0.0229642	0.0255979	0.0240217	0.0190232	0.0222943	0.0166657	0.016759	0.0241946	0.0193277	1.44368	0.798844	0.529751	-0.324014	0.195828	0.0972696	Not Detected	Not Detected	Not Detected	Not Detected	Not Detected	Not Detected	Not Detected	Not Detected	Not Detected	3	3	3	FALSE	A_30_P01020394	chr5:124485370-124502361_R										lincRNA:chr5:124485370-124502361 reverse strand	chr5:124502347-124502288	mm|5qF
807	A_30_P01020396	0.230411	0.20936	0.223323	0.630665	0.423741	0.31755	0.312321	0.396284	0.228003	0.221031	0.457318	0.312203	2.06902	0.682681	1.04895	-0.550716	0.0716114	0.227081	Detected	Detected	Detected	Detected	Detected	Detected	Detected	Detected	Detected	0	0	0	FALSE	A_30_P01020396	chr12:81719382-81731865_F										lincRNA:chr12:81719382-81731865 forward strand	chr12:81730146-81730205	mm|12qD1
808	A_30_P01020410	0.012261	0.010345	0.0104258	0.0224036	0.0293491	0.0272783	0.0218107	0.025311	0.0289827	0.0110106	0.0263437	0.0253681	2.39258	0.962969	1.25857	-0.0544391	0.00151739	0.75733	Not Detected	Not Detected	Not Detected	Not Detected	Not Detected	Not Detected	Not Detected	Not Detected	Not Detected	3	3	3	FALSE	A_30_P01020410	chr3:83120454-83152078_F										lincRNA:chr3:83120454-83152078 forward strand	chr3:83151988-83152047	mm|3qE3
809	A_30_P01020417	0.0570946	0.0430634	0.0624347	0.136513	0.123248	0.141651	0.126696	0.118451	0.171919	0.0541976	0.133804	0.139022	2.46882	1.03899	1.30382	0.055188	0.00807003	0.844682	Detected	Not Detected	Detected	Detected	Not Detected	Detected	Detected	Detected	Detected	1	1	0	FALSE	A_30_P01020417	chr15:73475785-73482471_F										lincRNA:chr15:73475785-73482471 forward strand	chr15:73475814-73475873	mm|15qD3
810	A_30_P01020418	0.0107635	0.0214164	0.00925488	0.0416623	0.0357396	0.0248175	0.0197104	0.0225851	0.0407902	0.0138116	0.0340731	0.0276952	2.46699	0.812817	1.30275	-0.298998	0.0452635	0.437281	Not Detected	Not Detected	Not Detected	Not Detected	Not Detected	Not Detected	Not Detected	Not Detected	Not Detected	3	3	3	FALSE	A_30_P01020418	chr3:3030146-3033623_F										lincRNA:chr3:3030146-3033623 forward strand	chr3:3032761-3032820	mm|3qA1
811	A_30_P01020419	0.0121348	0.0102316	0.0102846	0.0220959	0.0288933	0.026752	0.021368	0.029062	0.0184885	0.0108837	0.0259137	0.0229729	2.38097	0.886513	1.25155	-0.173786	0.00144621	0.45211	Not Detected	Not Detected	Not Detected	Not Detected	Not Detected	Not Detected	Not Detected	Not Detected	Not Detected	3	3	3	FALSE	A_30_P01020419	chr3:57414750-57427825_F										lincRNA:chr3:57414750-57427825 forward strand	chr3:57418519-57418578	mm|3qD
812	A_30_P01020420	0.146461	0.0833963	0.0883597	0.255359	0.0422771	0.0482812	0.0525707	0.0617758	0.086218	0.106072	0.115306	0.0668548	1.08705	0.579805	0.120415	-0.786359	0.7219	0.75827	Detected	Detected	Detected	Detected	Not Detected	Not Detected	Not Detected	Not Detected	Not Detected	0	2	3	FALSE	A_30_P01020420	chr10:116814196-116920696_R										lincRNA:chr10:116814196-116920696 reverse strand	chr10:116814588-116814529	mm|10qD2
813	A_30_P01020426	2.22605	1.98948	2.00966	1.83448	1.2557	1.08195	1.0465	1.12751	1.52221	2.07506	1.39071	1.23207	0.670202	0.88593	-0.577333	-0.174735	0.107605	0.607052	Detected	Detected	Detected	Detected	Detected	Detected	Detected	Detected	Detected	0	0	0	FALSE	A_30_P01020426	chr19:6268793-6276607_R										lincRNA:chr19:6268793-6276607 reverse strand	chr19:6269643-6269584	mm|19qA
814	A_30_P01020431	0.083074	0.0990379	0.096517	0.0890267	0.0262125	0.0767456	0.0361762	0.073388	0.0399251	0.0928763	0.063995	0.0498298	0.689034	0.778651	-0.537352	-0.360951	0.325891	0.718732	Detected	Detected	Detected	Not Detected	Not Detected	Not Detected	Not Detected	Not Detected	Not Detected	0	3	3	FALSE	A_30_P01020431	chr3:51784862-51793999_F										lincRNA:chr3:51784862-51793999 forward strand	chr3:51793921-51793980	mm|3qC
815	A_30_P01020436	0.098435	0.0971677	0.145097	0.0522602	0.0408764	0.0246501	0.0296714	0.022351	0.0705775	0.113567	0.0392622	0.0408666	0.34572	1.04086	-1.53232	0.0577806	0.02039	0.929165	Detected	Detected	Detected	Not Detected	Not Detected	Not Detected	Not Detected	Not Detected	Not Detected	0	3	3	FALSE	A_30_P01020436	chr4:146507925-146532650_R										lincRNA:chr4:146507925-146532650 reverse strand	chr4:146531517-146531458	mm|4qE1
816	A_30_P01020442	0.293897	0.328262	0.329479	0.235569	0.152588	0.249947	0.418074	0.143679	0.176133	0.317213	0.212701	0.245962	0.670531	1.15637	-0.576624	0.209608	0.106412	0.890471	Detected	Detected	Detected	Detected	Detected	Detected	Detected	Detected	Detected	0	0	0	FALSE	A_30_P01020442	chr15:92174226-92201201_F										lincRNA:chr15:92174226-92201201 forward strand	chr15:92197253-92197312	mm|15qE3
817	A_30_P01020444	0.0292397	0.0195444	0.0168361	0.020886	0.0278937	0.0261683	0.0850374	0.0243017	0.0182678	0.0218734	0.0249827	0.0425356	1.14215	1.70261	0.191748	0.767744	0.470676	0.589872	Not Detected	Not Detected	Not Detected	Not Detected	Not Detected	Not Detected	Not Detected	Not Detected	Not Detected	3	3	3	FALSE	A_30_P01020444	chr14:65720392-65769859_R										lincRNA:chr14:65720392-65769859 reverse strand
818	A_30_P01020445	0.0116048	0.0111402	0.00983061	0.0210356	0.0275586	0.0256067	0.0203998	0.0234907	0.0276237	0.0108585	0.0247336	0.0238381	2.2778	0.963792	1.18764	-0.0532065	0.00214151	0.764501	Not Detected	Not Detected	Not Detected	Not Detected	Not Detected	Not Detected	Not Detected	Not Detected	Not Detected	3	3	3	FALSE	A_30_P01020445	chr2:92582386-92599365_F										lincRNA:chr2:92582386-92599365 forward strand	chr2:92599169-92599228	mm|2qE1
819	A_30_P01020448	0.407038	0.512381	0.550941	0.38652	0.646418	0.69113	0.865715	0.79131	0.569862	0.49012	0.574689	0.742296	1.17255	1.29165	0.229647	0.369212	0.556118	0.297858	Detected	Detected	Detected	Detected	Detected	Detected	Detected	Detected	Detected	0	0	0	FALSE	A_30_P01020448	chr2:77152807-77155092_R										lincRNA:chr2:77152807-77155092 reverse strand	chr2:77154937-77154878	mm|2qC3
820	A_30_P01020449	0.263837	0.322494	0.354039	1.39528	1.16603	1.07976	1.14951	0.645119	0.363122	0.313457	1.21369	0.71925	3.87195	0.592614	1.95306	-0.754834	0.000330314	0.196341	Detected	Detected	Detected	Detected	Detected	Detected	Detected	Detected	Detected	0	0	0	FALSE	A_30_P01020449	chr12:17888352-17907493_F										lincRNA:chr12:17888352-17907493 forward strand	chr12:17888662-17888721	mm|12qA1.2
821	A_30_P01020455	0.024227	0.00890791	0.00897268	0.0200942	0.0938053	0.0238327	0.0194757	0.0219977	0.0270971	0.0140359	0.0459108	0.0228568	3.27096	0.497853	1.70971	-1.00621	0.159902	0.45395	Not Detected	Not Detected	Not Detected	Not Detected	Not Detected	Not Detected	Not Detected	Not Detected	Not Detected	3	3	3	FALSE	A_30_P01020455	chr6:86425510-86450160_F										lincRNA:chr6:86425510-86450160 forward strand	chr6:86446639-86446698	mm|6qD1
822	A_30_P01020460	0.136281	0.142617	0.130804	0.0702993	0.0263185	0.0260501	0.0197259	0.0403461	0.0428049	0.136567	0.0408893	0.0342923	0.299408	0.838662	-1.73982	-0.253839	0.0560243	0.794186	Detected	Detected	Detected	Not Detected	Not Detected	Not Detected	Not Detected	Not Detected	Not Detected	0	3	3	FALSE	A_30_P01020460	chr9:31873801-31874407_F										lincRNA:chr9:31873801-31874407 forward strand	chr9:31874228-31874287	mm|9qA4
823	A_30_P01020464	0.96122	0.892397	0.847488	1.17311	1.40972	1.28802	1.33211	1.30482	2.27927	0.900368	1.29029	1.63873	1.43306	1.27005	0.519103	0.344888	0.00722224	0.376058	Detected	Detected	Detected	Detected	Detected	Detected	Detected	Detected	Detected	0	0	0	FALSE	A_30_P01020464	chr5:52461266-52541416_R										lincRNA:chr5:52461266-52541416 reverse strand	chr5:52506800-52506741	mm|5qC1
824	A_30_P01020467	10.897	9.71101	10.1781	27.4766	28.2669	23.9218	20.8455	22.4351	23.0004	10.262	26.5551	22.0936	2.5877	0.831993	1.37167	-0.265357	0.000272108	0.0506038	Detected	Detected	Detected	Detected	Detected	Detected	Detected	Detected	Detected	0	0	0	FALSE	A_30_P01020467	chr11:120079199-120130099_F										lincRNA:chr11:120079199-120130099 forward strand	chr11:120098636-120098695	mm|11qE2
825	A_30_P01020469	0.0125957	0.0334628	0.0323875	0.0505357	0.0308749	0.0291538	0.0227569	0.0331961	0.0198287	0.0261487	0.0368548	0.0252606	1.40943	0.685408	0.495116	-0.544966	0.349676	0.188075	Not Detected	Not Detected	Not Detected	Not Detected	Not Detected	Not Detected	Not Detected	Not Detected	Not Detected	3	3	3	FALSE	A_30_P01020469	chr4:140609589-140614789_R										lincRNA:chr4:140609589-140614789 reverse strand	chr4:140613994-140613935	mm|4qD3
826	A_30_P01020476	103.359	88.527	84.4487	260.684	254.128	231.688	184.014	205.466	188.238	92.1114	248.833	192.573	2.70144	0.773903	1.43373	-0.369776	0.000520233	0.0065228	Detected	Detected	Detected	Detected	Detected	Detected	Detected	Detected	Detected	0	0	0	FALSE	A_30_P01020476	chrX:18744367-18853992_F										lincRNA:chrX:18744367-18853992 forward strand	chrX:18814996-18815055	mm|XqA1.3
827	A_30_P01020478	0.516904	0.598464	0.808892	1.68188	1.1208	1.05778	1.21386	1.59534	0.961112	0.64142	1.28682	1.25677	2.0062	0.976649	1.00447	-0.0340873	0.0248943	0.916889	Detected	Detected	Detected	Detected	Detected	Detected	Detected	Detected	Detected	0	0	0	FALSE	A_30_P01020478	chr7:16584852-16657252_F										lincRNA:chr7:16584852-16657252 forward strand	chr7:16647443-16647502	mm|7qA2
828	A_30_P01020480	0.0161885	0.0216327	0.0187662	0.0224006	0.0297027	0.0279279	0.0220324	0.0305138	0.0193149	0.0188625	0.0266771	0.0239537	1.41429	0.897914	0.500082	-0.155352	0.0444487	0.505548	Not Detected	Not Detected	Not Detected	Not Detected	Not Detected	Not Detected	Not Detected	Not Detected	Not Detected	3	3	3	FALSE	A_30_P01020480	chr1:164595106-164601906_R										lincRNA:chr1:164595106-164601906 reverse strand	chr1:164600851-164600792	mm|1qH2.1
829	A_30_P01020482	0.0315778	0.0269793	0.0303033	0.0908733	0.405079	0.0502812	0.067544	0.0913682	0.034677	0.0296201	0.182078	0.0645297	6.1471	0.354407	2.61991	-1.49652	0.147997	0.374659	Not Detected	Not Detected	Not Detected	Not Detected	Detected	Not Detected	Not Detected	Not Detected	Not Detected	3	2	3	FALSE	A_30_P01020482	chr1:133841295-133841645_F										lincRNA:chr1:133841295-133841645 forward strand	chr1:133841449-133841508	mm|1qE4
830	A_30_P01020483	0.0670666	0.103172	0.0663099	0.120641	0.0415705	0.0587077	0.15513	0.0645396	0.0348536	0.0788495	0.0736399	0.084841	0.933929	1.15211	-0.098615	0.204275	0.69954	0.921247	Detected	Detected	Detected	Detected	Not Detected	Not Detected	Detected	Not Detected	Not Detected	0	2	2	FALSE	A_30_P01020483	chr15:66685663-66686113_R										lincRNA:chr15:66685663-66686113 reverse strand	chr15:66685855-66685796	mm|15qD2
831	A_30_P01020484	0.0103283	0.0204562	0.00896794	0.0192923	0.0374766	0.0240543	0.0191204	0.0220151	0.016069	0.0132508	0.0269411	0.0190682	2.03317	0.707773	1.02373	-0.498642	0.0871106	0.245293	Not Detected	Not Detected	Not Detected	Not Detected	Not Detected	Not Detected	Not Detected	Not Detected	Not Detected	3	3	3	FALSE	A_30_P01020484	chr17:5798656-5802900_F										lincRNA:chr17:5798656-5802900 forward strand	chr17:5798701-5798760	mm|17qA1
832	A_30_P01020487	2.93537	2.82393	2.87358	9.99521	8.22439	7.45344	6.01195	6.13865	5.09526	2.87763	8.55768	5.74862	2.97387	0.67175	1.57234	-0.574005	0.00563421	0.0244951	Detected	Detected	Detected	Detected	Detected	Detected	Detected	Detected	Detected	0	0	0	FALSE	A_30_P01020487	chr2:167404245-167414345_R										lincRNA:chr2:167404245-167414345 reverse strand	chr2:167404806-167404747	mm|2qH3
833	A_30_P01020489	0.0239146	0.0464448	0.0422965	0.0566709	0.493003	0.0246299	0.100165	0.0495306	0.0288731	0.0375519	0.191435	0.059523	5.09786	0.310931	2.34989	-1.68533	0.423305	0.629475	Not Detected	Detected	Not Detected	Not Detected	Detected	Not Detected	Detected	Not Detected	Not Detected	2	2	2	FALSE	A_30_P01020489	chr3:52206874-52207385_F										lincRNA:chr3:52206874-52207385 forward strand	chr3:52207229-52207288	mm|3qC
834	A_30_P01020495	0.110506	0.136834	0.118003	0.127354	0.0705285	0.109712	0.156664	0.205851	0.115791	0.121781	0.102531	0.159435	0.841931	1.55499	-0.248227	0.636907	0.384225	0.142067	Detected	Detected	Detected	Detected	Not Detected	Not Detected	Detected	Detected	Detected	0	2	0	FALSE	A_30_P01020495	chr4:40194362-40202712_R										lincRNA:chr4:40194362-40202712 reverse strand	chr4:40202215-40202156	mm|4qA5
835	A_30_P01020504	0.0560104	0.00972052	0.00982607	0.0212838	0.0282956	0.026364	0.0208578	0.0244203	0.0183518	0.0251856	0.0253145	0.0212099	1.00511	0.837859	0.00736049	-0.255221	0.598129	0.211968	Not Detected	Not Detected	Not Detected	Not Detected	Not Detected	Not Detected	Not Detected	Not Detected	Not Detected	3	3	3	FALSE	A_30_P01020504	chr3:62895551-62896444_R										lincRNA:chr3:62895551-62896444 reverse strand	chr3:62895731-62895672	mm|3qE1
836	A_30_P01020514	16.8684	16.8176	17.7858	60.4826	45.8218	44.906	35.4278	39.8582	36.9583	17.1572	50.4035	37.4148	2.93774	0.742306	1.5547	-0.429915	0.00645866	0.0810765	Detected	Detected	Detected	Detected	Detected	Detected	Detected	Detected	Detected	0	0	0	FALSE	A_30_P01020514	chr17:39983902-39985688_F										lincRNA:chr17:39983902-39985688 forward strand	chr17:39985629-39985688	mm|17qB1
837	A_30_P01020518	1.64759	1.14124	1.31615	1.21598	1.3945	1.45481	1.68066	1.65241	1.67952	1.36833	1.3551	1.67087	0.99033	1.23302	-0.0140192	0.302202	0.993494	0.0578391	Detected	Detected	Detected	Detected	Detected	Detected	Detected	Detected	Detected	0	0	0	FALSE	A_30_P01020518	chr9:78104935-78116974_F										lincRNA:chr9:78104935-78116974 forward strand	chr9:78116774-78116833	mm|9qE1
838	A_30_P01020522	0.0307377	0.049366	0.086155	0.115117	0.0741812	0.0624378	0.0450455	0.0783408	0.0460346	0.0554196	0.0839119	0.0564736	1.51412	0.673011	0.598479	-0.571298	0.264135	0.19769	Not Detected	Detected	Detected	Detected	Not Detected	Not Detected	Not Detected	Not Detected	Not Detected	1	2	3	FALSE	A_30_P01020522	chr14:65720392-65769859_R										lincRNA:chr14:65720392-65769859 reverse strand
839	A_30_P01020523	2.81232	2.67169	2.7372	4.08362	4.45162	4.12926	4.47544	4.51779	3.96849	2.7404	4.2215	4.32057	1.54047	1.02347	0.623369	0.0334667	0.00067025	0.681884	Detected	Detected	Detected	Detected	Detected	Detected	Detected	Detected	Detected	0	0	0	FALSE	A_30_P01020523	chr11:6421951-6429173_R										lincRNA:chr11:6421951-6429173 reverse strand	chr11:6428115-6428056	mm|11qA1
840	A_30_P01020531	0.0101228	0.00867159	0.00872153	0.0184441	0.0244328	0.023183	0.0182903	0.0213357	0.0159686	0.00917197	0.02202	0.0185315	2.40079	0.841578	1.26351	-0.248831	0.00238127	0.225337	Not Detected	Not Detected	Not Detected	Not Detected	Not Detected	Not Detected	Not Detected	Not Detected	Not Detected	3	3	3	FALSE	A_30_P01020531	chr3:60288326-60288925_R										lincRNA:chr3:60288326-60288925 reverse strand	chr3:60288688-60288629	mm|3qD
841	A_30_P01020533	0.0570465	0.0969463	0.117273	0.187825	0.148938	0.110775	0.166871	0.201957	0.0817144	0.090422	0.149179	0.150181	1.64981	1.00671	0.7223	0.00965352	0.127522	0.908183	Not Detected	Detected	Detected	Detected	Detected	Not Detected	Detected	Detected	Not Detected	1	1	1	FALSE	A_30_P01020533	chr9:106170918-106177894_F										lincRNA:chr9:106170918-106177894 forward strand	chr9:106177470-106177529	mm|9qF1
842	A_30_P01020534	0.18244	0.180494	0.18435	0.267792	0.434239	0.364685	0.283251	0.400346	0.322222	0.182428	0.355572	0.335273	1.94911	0.942912	0.962815	-0.0848048	0.0441901	0.790599	Detected	Detected	Detected	Detected	Detected	Detected	Detected	Detected	Detected	0	0	0	FALSE	A_30_P01020534	chr6:47595238-47601893_R										lincRNA:chr6:47595238-47601893 reverse strand	chr6:47601791-47601732	mm|6qB2.3
843	A_30_P01020536	0.0665107	0.149022	0.0592806	0.104478	0.0878912	0.102913	0.118227	0.128029	0.0438611	0.0916044	0.0984277	0.0967058	1.07449	0.982506	0.103648	-0.0254624	0.642033	0.766635	Detected	Detected	Detected	Not Detected	Not Detected	Not Detected	Not Detected	Not Detected	Not Detected	0	3	3	FALSE	A_30_P01020536	chr7:4827340-4863315_R										lincRNA:chr7:4827340-4863315 reverse strand	chr7:4850374-4850315	mm|7qA1
844	A_30_P01020538	0.0580534	0.0784902	0.0703932	0.149653	0.106494	0.114769	0.0877489	0.168771	0.0466468	0.068979	0.123639	0.101056	1.79241	0.817346	0.841904	-0.290982	0.0135909	0.477875	Detected	Detected	Detected	Detected	Not Detected	Not Detected	Not Detected	Detected	Not Detected	0	2	2	FALSE	A_30_P01020538	chrX:120819096-120820227_R										lincRNA:chrX:120819096-120820227 reverse strand	chrX:120819156-120819097	mm|XqE3
845	A_30_P01020540	0.0441562	0.0351664	0.0476755	0.15064	0.106881	0.125701	0.122827	0.0965952	0.0795076	0.0423327	0.127741	0.0996432	3.01754	0.780044	1.59337	-0.358373	0.00125093	0.191125	Not Detected	Not Detected	Not Detected	Detected	Not Detected	Not Detected	Detected	Not Detected	Not Detected	3	2	2	FALSE	A_30_P01020540	chr12:9117250-9128800_F										lincRNA:chr12:9117250-9128800 forward strand	chr12:9125280-9125339	mm|12qA1.1
846	A_30_P01020541	0.0093209	0.0122034	0.00982019	0.0312332	0.147997	0.0216943	0.0337743	0.0199098	0.0222605	0.0104482	0.0669749	0.0253149	6.41021	0.377976	2.68037	-1.40363	0.12314	0.395745	Not Detected	Not Detected	Not Detected	Not Detected	Detected	Not Detected	Not Detected	Not Detected	Not Detected	3	2	3	FALSE	A_30_P01020541	chr2:71576218-71603818_R										lincRNA:chr2:71576218-71603818 reverse strand	chr2:71581885-71581826	mm|2qC2
847	A_30_P01020542	0.0467712	0.0361677	0.0309472	0.0259696	0.0268716	0.0250963	0.0198935	0.0232888	0.017435	0.037962	0.0259792	0.0202058	0.684347	0.777768	-0.5472	-0.362589	0.0900684	0.0839782	Not Detected	Not Detected	Not Detected	Not Detected	Not Detected	Not Detected	Not Detected	Not Detected	Not Detected	3	3	3	FALSE	A_30_P01020542	chr5:26333765-26338143_F										lincRNA:chr5:26333765-26338143 forward strand	chr5:26338040-26338099	mm|5qB1
848	A_30_P01020543	0.0120708	0.0302824	0.0322473	0.0263379	0.0290832	0.0270654	0.0216345	0.025222	0.0185657	0.0248668	0.0274955	0.0218074	1.10571	0.793127	0.144972	-0.334377	0.614035	0.102294	Not Detected	Not Detected	Not Detected	Not Detected	Not Detected	Not Detected	Not Detected	Not Detected	Not Detected	3	3	3	FALSE	A_30_P01020543	chr5:35893909-35899497_R										lincRNA:chr5:35893909-35899497 reverse strand	chr5:35897120-35897061	mm|5qB3
849	A_30_P01020545	0.0810928	0.0738038	0.0706054	0.0327485	0.0244615	0.0232085	0.0484535	0.0213693	0.0159926	0.0751673	0.0268062	0.0286051	0.35662	1.06711	-1.48754	0.0937078	0.00508833	0.920418	Detected	Detected	Detected	Not Detected	Not Detected	Not Detected	Not Detected	Not Detected	Not Detected	0	3	3	FALSE	A_30_P01020545	chr13:62703974-62725544_R										lincRNA:chr13:62703974-62725544 reverse strand	chr13:62704531-62704472	mm|13qB3
850	A_30_P01020547	0.219606	0.241897	0.223749	0.359684	0.314061	0.33434	0.313233	0.484345	0.27294	0.228417	0.336028	0.356839	1.47112	1.06193	0.556911	0.086692	0.00191004	0.877205	Detected	Detected	Detected	Detected	Detected	Detected	Detected	Detected	Detected	0	0	0	FALSE	A_30_P01020547	chr2:167388900-167402475_F										lincRNA:chr2:167388900-167402475 forward strand	chr2:167400912-167400971	mm|2qH3
851	A_30_P01020548	0.0106778	0.00917442	0.00913159	0.0194743	0.29303	0.0243695	0.047522	0.103824	0.0170867	0.00966127	0.112291	0.0561441	11.6228	0.499987	3.53889	-1.00004	0.192074	0.878909	Not Detected	Not Detected	Not Detected	Not Detected	Detected	Not Detected	Not Detected	Not Detected	Not Detected	3	2	3	FALSE	A_30_P01020548	chr13:94725285-94725556_F										lincRNA:chr13:94725285-94725556 forward strand	chr13:94725292-94725351	mm|13qD1
852	A_30_P01020549	0.0563662	0.0576485	0.0454158	0.041871	0.0236081	0.138793	0.0295022	0.0205923	0.0151442	0.0531435	0.0680908	0.0217463	1.28126	0.319372	0.357567	-1.64669	0.967274	0.220119	Detected	Detected	Detected	Not Detected	Not Detected	Detected	Not Detected	Not Detected	Not Detected	0	2	3	FALSE	A_30_P01020549	chr13:62580825-62596425_R										lincRNA:chr13:62580825-62596425 reverse strand	chr13:62588501-62588442	mm|13qB3
853	A_30_P01020550	0.111592	0.106015	0.181507	0.0427181	0.0336969	0.0512304	0.0197797	0.0226929	0.0336737	0.133038	0.0425485	0.0253821	0.319822	0.596546	-1.64466	-0.745295	0.00785855	0.0620033	Detected	Detected	Detected	Not Detected	Not Detected	Not Detected	Not Detected	Not Detected	Not Detected	0	3	3	FALSE	A_30_P01020550	chr13:28490070-28492645_R										lincRNA:chr13:28490070-28492645 reverse strand	chr13:28490400-28490341	mm|13qA3.1
854	A_30_P01020554	0.0103831	0.0125861	0.0143464	0.0188198	0.0248394	0.0413444	0.0185674	0.0264305	0.0160617	0.0124385	0.0283345	0.0203532	2.27797	0.718318	1.18775	-0.477306	0.0618288	0.346029	Not Detected	Not Detected	Not Detected	Not Detected	Not Detected	Not Detected	Not Detected	Not Detected	Not Detected	3	3	3	FALSE	A_30_P01020554	chr18:78190463-78235438_R										lincRNA:chr18:78190463-78235438 reverse strand	chr18:78210868-78210809	mm|18qE3
855	A_30_P01020560	0.331866	0.357583	0.30892	0.363401	0.433704	0.372762	0.392455	0.471754	0.433799	0.33279	0.389956	0.432669	1.17178	1.10953	0.2287	0.149954	0.091076	0.245696	Detected	Detected	Detected	Detected	Detected	Detected	Detected	Detected	Detected	0	0	0	FALSE	A_30_P01020560	chr9:65376063-65390480_F										lincRNA:chr9:65376063-65390480 forward strand	chr9:65384110-65384169	mm|9qC
856	A_30_P01020564	0.302779	0.279202	0.279707	0.330284	0.314989	0.289079	0.334196	0.357945	0.320116	0.287229	0.311451	0.337419	1.08433	1.08338	0.116802	0.115535	0.174394	0.190216	Detected	Detected	Detected	Detected	Detected	Detected	Detected	Detected	Detected	0	0	0	FALSE	A_30_P01020564	chr4:129479254-129480362_R										lincRNA:chr4:129479254-129480362 reverse strand	chr4:129480152-129480093	mm|4qD2.2
857	A_30_P01020569	0.523054	0.500848	0.546034	0.369838	0.302432	0.289762	0.40406	0.286703	0.701496	0.523312	0.320677	0.464086	0.612784	1.44721	-0.70655	0.533272	0.0149324	0.361421	Detected	Detected	Detected	Detected	Detected	Detected	Detected	Detected	Detected	0	0	0	FALSE	A_30_P01020569	chr8:119090566-119097735_F										lincRNA:chr8:119090566-119097735 forward strand	chr8:119095331-119095390	mm|8qE1
858	A_30_P01020570	114.582	97.6472	107.979	299.13	275.073	248.572	208.251	230.244	232.625	106.736	274.258	223.706	2.5695	0.815678	1.36149	-0.293929	0.000207784	0.0420341	Detected	Detected	Detected	Detected	Detected	Detected	Detected	Detected	Detected	0	0	0	FALSE	A_30_P01020570	chr12:73838608-73862621_F										lincRNA:chr12:73838608-73862621 forward strand	chr12:73862399-73862458	mm|12qC3
859	A_30_P01020571	0.667591	0.526577	0.500362	0.488115	0.144764	0.172772	0.174872	0.0932225	0.182408	0.564844	0.26855	0.150167	0.475441	0.559178	-1.07266	-0.83862	0.137237	0.355992	Detected	Detected	Detected	Detected	Detected	Detected	Detected	Not Detected	Detected	0	0	1	FALSE	A_30_P01020571	chr2:48826955-48827592_F										lincRNA:chr2:48826955-48827592 forward strand	chr2:48827454-48827513	mm|2qC1.1
860	A_30_P01020575	0.0108908	0.00924743	0.0093829	0.0202847	0.0266586	0.0249798	0.0199086	0.0230605	0.0170855	0.00984039	0.0239743	0.0200182	2.43632	0.834984	1.2847	-0.26018	0.00171268	0.204323	Not Detected	Not Detected	Not Detected	Not Detected	Not Detected	Not Detected	Not Detected	Not Detected	Not Detected	3	3	3	FALSE	A_30_P01020575	chr19:7458725-7474825_R										lincRNA:chr19:7458725-7474825 reverse strand	chr19:7465675-7465616	mm|19qA
861	A_30_P01020578	0.094951	0.0859796	0.0908091	0.210589	0.175712	0.158311	0.121515	0.101053	0.107549	0.0905799	0.181537	0.110039	2.00417	0.606152	1.003	-0.722248	0.00845095	0.0111074	Detected	Detected	Detected	Detected	Detected	Detected	Detected	Not Detected	Detected	0	0	1	FALSE	A_30_P01020578	chr1:193815525-193825775_R										lincRNA:chr1:193815525-193825775 reverse strand	chr1:193816904-193816845	mm|1qH6
862	A_30_P01020579	0.25519	0.292779	0.266339	0.274889	0.368315	0.321285	0.415339	0.301765	0.476283	0.271436	0.321496	0.397795	1.18443	1.23733	0.24419	0.307225	0.182884	0.285248	Detected	Detected	Detected	Detected	Detected	Detected	Detected	Detected	Detected	0	0	0	FALSE	A_30_P01020579	chr5:22056218-22206995_F										lincRNA:chr5:22056218-22206995 forward strand	chr5:22200649-22200708	mm|5qA3
863	A_30_P01020580	0.0936457	0.0498053	0.0568361	0.121471	0.0498398	0.0409681	0.0573584	0.0628737	0.107927	0.0667624	0.0707596	0.0760532	1.05987	1.07481	0.08389	0.104084	0.95757	0.722866	Detected	Detected	Detected	Detected	Not Detected	Not Detected	Not Detected	Not Detected	Detected	0	2	2	FALSE	A_30_P01020580	chr2:151992806-152025456_R										lincRNA:chr2:151992806-152025456 reverse strand	chr2:152021301-152021242	mm|2qG3
864	A_30_P01020595	0.0773676	0.0628558	0.0668837	0.178996	0.0651749	0.0697435	0.149604	0.105287	0.0792296	0.0690357	0.104638	0.111374	1.51571	1.06437	0.599994	0.0899991	0.448639	0.727463	Detected	Detected	Detected	Detected	Not Detected	Not Detected	Detected	Not Detected	Not Detected	0	2	2	FALSE	A_30_P01020595	chr13:28477490-28985604_F										lincRNA:chr13:28477490-28985604 forward strand	chr13:28975280-28975339	mm|13qA3.1
865	A_30_P01020597	0.0196794	0.0121216	0.010365	0.0223021	0.0292014	0.0372469	0.0217427	0.0253239	0.0511032	0.0140553	0.0295834	0.0327233	2.10478	1.10613	1.07367	0.145527	0.0384862	0.879819	Not Detected	Not Detected	Not Detected	Not Detected	Not Detected	Not Detected	Not Detected	Not Detected	Not Detected	3	3	3	FALSE	A_30_P01020597	chr8:124355710-124401160_F										lincRNA:chr8:124355710-124401160 forward strand	chr8:124398160-124398219	mm|8qE1
866	A_30_P01020598	0.0424214	0.0439658	0.00921767	0.0259112	0.0248344	0.0427554	0.018683	0.0214486	0.0154773	0.0318683	0.031167	0.0185363	0.977993	0.594741	-0.0321033	-0.749665	0.795703	0.0852658	Not Detected	Detected	Not Detected	Not Detected	Not Detected	Not Detected	Not Detected	Not Detected	Not Detected	2	3	3	FALSE	A_30_P01020598	chr1:161973754-162006639_R										lincRNA:chr1:161973754-162006639 reverse strand	chr1:162006526-162006467	mm|1qH2.1
867	A_30_P01020602	0.0135037	0.00971515	0.0187671	0.0211495	0.0282104	0.026335	0.0443305	0.0239599	0.0194715	0.0139953	0.0252316	0.029254	1.80286	1.15942	0.850288	0.213402	0.0650428	0.753946	Not Detected	Not Detected	Not Detected	Not Detected	Not Detected	Not Detected	Not Detected	Not Detected	Not Detected	3	3	3	FALSE	A_30_P01020602	chr7:48854599-48868579_F										lincRNA:chr7:48854599-48868579 forward strand	chr7:48858845-48858904	mm|7qB3
868	A_30_P01020603	0.0516522	0.0547025	0.0731524	0.0668177	0.0634977	0.0781196	0.0763052	0.0608415	0.0542064	0.0598357	0.0694783	0.0637844	1.16115	0.918047	0.215557	-0.12336	0.290123	0.488654	Not Detected	Detected	Detected	Not Detected	Not Detected	Not Detected	Not Detected	Not Detected	Not Detected	1	3	3	FALSE	A_30_P01020603	chr18:54115625-54123729_F										lincRNA:chr18:54115625-54123729 forward strand	chr18:54117238-54117297	mm|18qD2
869	A_30_P01020605	0.010213	0.0263496	0.00876388	0.0362396	0.0250274	0.0235136	0.0480767	0.0214406	0.0157123	0.0151088	0.0282602	0.0284099	1.87044	1.0053	0.903378	0.00762103	0.155315	0.817219	Not Detected	Not Detected	Not Detected	Not Detected	Not Detected	Not Detected	Not Detected	Not Detected	Not Detected	3	3	3	FALSE	A_30_P01020605	chr10:69819062-69871640_R										lincRNA:chr10:69819062-69871640 reverse strand	chr10:69833931-69833872	mm|10qB5.3
870	A_30_P01020611	0.0110051	0.00942859	0.00951308	0.0204784	0.0268788	0.0255178	0.0202589	0.023169	0.0173632	0.00998226	0.0242917	0.0202637	2.43348	0.834183	1.28302	-0.261564	0.00194953	0.198567	Not Detected	Not Detected	Not Detected	Not Detected	Not Detected	Not Detected	Not Detected	Not Detected	Not Detected	3	3	3	FALSE	A_30_P01020611	chr13:94190118-94190496_R										lincRNA:chr13:94190118-94190496 reverse strand	chr13:94190244-94190185	mm|13qC3
871	A_30_P01020613	0.138481	0.113776	0.141353	0.427062	0.494914	0.363822	0.30239	0.358285	0.349329	0.131203	0.428599	0.336668	3.26668	0.785508	1.70782	-0.348302	0.000630534	0.0993873	Detected	Detected	Detected	Detected	Detected	Detected	Detected	Detected	Detected	0	0	0	FALSE	A_30_P01020613	chr9:61076051-61076314_R										lincRNA:chr9:61076051-61076314 reverse strand	chr9:61076111-61076052	mm|9qB
872	A_30_P01020614	0.72551	0.745533	0.711494	0.92969	1.17909	1.06235	1.10033	1.15744	1.0216	0.727512	1.05704	1.09313	1.45295	1.03414	0.538987	0.0484284	0.0291228	0.666644	Detected	Detected	Detected	Detected	Detected	Detected	Detected	Detected	Detected	0	0	0	FALSE	A_30_P01020614	chr4:119967625-119978325_F										lincRNA:chr4:119967625-119978325 forward strand	chr4:119975860-119975919	mm|4qD2.2
873	A_30_P01020620	0.0118475	0.0100408	0.0100387	0.0215966	0.028275	0.0262204	0.0209025	0.024108	0.0180498	0.0106423	0.025364	0.0210201	2.38332	0.828736	1.25297	-0.271016	0.00151362	0.179147	Not Detected	Not Detected	Not Detected	Not Detected	Not Detected	Not Detected	Not Detected	Not Detected	Not Detected	3	3	3	FALSE	A_30_P01020620	chr13:98635795-98646617_R										lincRNA:chr13:98635795-98646617 reverse strand	chr13:98635915-98635856	mm|13qD1
874	A_30_P01020622	0.0112286	0.0155296	0.00952224	0.0215626	0.0268175	0.0249462	0.0198886	0.022849	0.0171442	0.0120935	0.0244421	0.0199606	2.0211	0.816649	1.01514	-0.292212	0.0232484	0.126231	Not Detected	Not Detected	Not Detected	Not Detected	Not Detected	Not Detected	Not Detected	Not Detected	Not Detected	3	3	3	FALSE	A_30_P01020622	chr8:15580278-15583962_R										lincRNA:chr8:15580278-15583962 reverse strand	chr8:15583528-15583469	mm|8qA1.1
875	A_30_P01020627	0.56026	0.586064	0.510735	0.49509	0.391263	0.354231	0.429533	0.532794	0.54984	0.552353	0.413528	0.504056	0.748666	1.21892	-0.417606	0.285599	0.079572	0.188032	Detected	Detected	Detected	Detected	Detected	Detected	Detected	Detected	Detected	0	0	0	FALSE	A_30_P01020627	chr3:87757295-87774970_F										lincRNA:chr3:87757295-87774970 forward strand
876	A_30_P01020637	0.0208326	0.0190951	0.0135664	0.0195285	0.0358132	0.0244838	0.0193968	0.0230791	0.0162453	0.0178314	0.0266085	0.0195737	1.49223	0.735618	0.577473	-0.442971	0.16135	0.251054	Not Detected	Not Detected	Not Detected	Not Detected	Not Detected	Not Detected	Not Detected	Not Detected	Not Detected	3	3	3	FALSE	A_30_P01020637	chr11:48603904-48611829_F										lincRNA:chr11:48603904-48611829 forward strand	chr11:48607834-48607893	mm|11qB1.2
877	A_30_P01020638	0.0108803	0.00927109	0.0107821	0.0304972	0.0263972	0.0248536	0.0195418	0.0230597	0.0173425	0.0103112	0.0272493	0.0199813	2.6427	0.733277	1.40201	-0.447569	0.000301536	0.0422801	Not Detected	Not Detected	Not Detected	Not Detected	Not Detected	Not Detected	Not Detected	Not Detected	Not Detected	3	3	3	FALSE	A_30_P01020638	chr15:61984389-62102500_R										lincRNA:chr15:61984389-62102500 reverse strand	chr15:62007442-62007383	mm|15qD1
878	A_30_P01020642	0.0128305	0.0108712	0.0128109	0.130071	0.031464	0.0296515	0.0230765	0.0268381	0.0297587	0.0121709	0.0637288	0.0265578	5.23617	0.416731	2.38851	-1.26281	0.0987715	0.322595	Not Detected	Not Detected	Not Detected	Detected	Not Detected	Not Detected	Not Detected	Not Detected	Not Detected	3	2	3	FALSE	A_30_P01020642	chr13:59969950-59989725_F										lincRNA:chr13:59969950-59989725 forward strand	chr13:59977561-59977620	mm|13qB2
879	A_30_P01020646	0.0123011	0.0103973	0.0105126	0.0228581	0.0303525	0.0284778	0.0225769	0.0256829	0.0194724	0.0110703	0.0272295	0.0225774	2.45968	0.829153	1.29847	-0.270289	0.0019054	0.187561	Not Detected	Not Detected	Not Detected	Not Detected	Not Detected	Not Detected	Not Detected	Not Detected	Not Detected	3	3	3	FALSE	A_30_P01020646	chr5:33779273-33780113_R										lincRNA:chr5:33779273-33780113 reverse strand	chr5:33779358-33779299	mm|5qB1
880	A_30_P01020650	0.0192923	0.0265582	0.0227597	0.0428385	0.0466185	0.025569	0.039484	0.0524576	0.0567177	0.0228701	0.038342	0.0495531	1.67652	1.2924	0.745466	0.370049	0.102575	0.285871	Not Detected	Not Detected	Not Detected	Not Detected	Not Detected	Not Detected	Not Detected	Not Detected	Not Detected	3	3	3	FALSE	A_30_P01020650	chr8:13200727-13207714_F										lincRNA:chr8:13200727-13207714 forward strand	chr8:13200845-13200904	mm|8qA1.1
881	A_30_P01020656	0.0121224	0.0102185	0.0103347	0.022182	0.0295643	0.0275065	0.658991	0.0254586	0.0192385	0.0108919	0.0264176	0.234563	2.42544	8.87903	1.27825	3.1504	0.00200303	0.486059	Not Detected	Not Detected	Not Detected	Not Detected	Not Detected	Not Detected	Detected	Not Detected	Not Detected	3	3	2	FALSE	A_30_P01020656	chr1:108657255-108667405_F										lincRNA:chr1:108657255-108667405 forward strand	chr1:108657464-108657523	mm|1qE2.1
882	A_30_P01020659	0.216293	0.192146	0.193424	0.310393	1.19138	0.201768	0.165275	0.333712	0.230829	0.200621	0.567846	0.243272	2.83044	0.428412	1.50103	-1.22293	0.299095	0.39003	Detected	Detected	Detected	Detected	Detected	Detected	Detected	Detected	Detected	0	0	0	FALSE	A_30_P01020659	chr5:35492530-35492959_R										lincRNA:chr5:35492530-35492959 reverse strand	chr5:35492593-35492534	mm|5qB2
883	A_30_P01020661	0.331678	0.349611	0.333121	0.352502	0.366318	0.43834	0.443599	0.439734	0.404012	0.338137	0.38572	0.429115	1.14072	1.1125	0.189948	0.15381	0.192939	0.237877	Detected	Detected	Detected	Detected	Detected	Detected	Detected	Detected	Detected	0	0	0	FALSE	A_30_P01020661	chr17:64022100-64063525_F										lincRNA:chr17:64022100-64063525 forward strand	chr17:64051789-64051848	mm|17qE1.1
884	A_30_P01020664	0.010779	0.00915576	0.00928205	0.0198561	0.0265222	0.024911	0.0197674	0.0226583	0.0164854	0.00973894	0.0237631	0.019637	2.44001	0.826367	1.28689	-0.275145	0.00233293	0.207056	Not Detected	Not Detected	Not Detected	Not Detected	Not Detected	Not Detected	Not Detected	Not Detected	Not Detected	3	3	3	FALSE	A_30_P01020664	chr15:60732209-60732822_R										lincRNA:chr15:60732209-60732822 reverse strand	chr15:60732425-60732366	mm|15qD1
885	A_30_P01020666	0.240472	0.286025	0.3203	0.103243	0.202376	0.208969	0.316086	0.231299	0.247033	0.282265	0.171529	0.264806	0.607688	1.5438	-0.718598	0.626482	0.131502	0.164707	Detected	Detected	Detected	Not Detected	Detected	Detected	Detected	Detected	Detected	0	1	0	FALSE	A_30_P01020666	chr4:94121118-94148348_R										lincRNA:chr4:94121118-94148348 reverse strand	chr4:94127417-94127358	mm|4qC5
886	A_30_P01020670	0.0111604	0.0095481	0.00963819	0.0204696	0.0273134	0.0257091	0.0201583	0.0238459	0.02358	0.0101156	0.0244974	0.0225281	2.42176	0.919612	1.27605	-0.120903	0.00251722	0.493685	Not Detected	Not Detected	Not Detected	Not Detected	Not Detected	Not Detected	Not Detected	Not Detected	Not Detected	3	3	3	FALSE	A_30_P01020670	chr12:23420304-23420859_R										lincRNA:chr12:23420304-23420859 reverse strand	chr12:23420555-23420496	mm|12qA1.3
887	A_30_P01020671	0.041223	0.0312229	0.0442602	0.0744091	0.0283161	0.11105	0.0610544	0.0599177	0.0825111	0.0389021	0.0712585	0.0678277	1.83174	0.951855	0.873215	-0.0711868	0.36593	0.856122	Not Detected	Not Detected	Not Detected	Not Detected	Not Detected	Not Detected	Not Detected	Not Detected	Not Detected	3	3	3	FALSE	A_30_P01020671	chr18:60789616-60807973_R										lincRNA:chr18:60789616-60807973 reverse strand	chr18:60807909-60807850	mm|18qE1
888	A_30_P01020672	0.134756	0.0705474	0.208199	0.0344517	0.0297661	0.0280321	0.0221398	0.0252913	0.0443024	0.137834	0.03075	0.0305778	0.223095	0.994401	-2.16427	-0.00810051	0.0418641	0.842189	Detected	Detected	Detected	Not Detected	Not Detected	Not Detected	Not Detected	Not Detected	Not Detected	0	3	3	FALSE	A_30_P01020672	chrX:18734106-18744367_R										lincRNA:chrX:18734106-18744367 reverse strand	chrX:18734168-18734109	mm|XqA1.3
889	A_30_P01020673	0.0117452	0.0100475	0.0124702	0.0220061	0.0294737	0.593304	0.457342	0.025016	0.0189093	0.011421	0.214928	0.167089	18.8187	0.77742	4.2341	-0.363233	0.2197	0.902066	Not Detected	Not Detected	Not Detected	Not Detected	Not Detected	Detected	Detected	Not Detected	Not Detected	3	2	2	FALSE	A_30_P01020673	chr1:193875525-193978800_F										lincRNA:chr1:193875525-193978800 forward strand	chr1:193958269-193958328	mm|1qH6
890	A_30_P01020675	0.231338	0.295533	0.260105	0.242331	0.322554	0.279369	0.319296	0.456237	0.344435	0.262325	0.281418	0.373322	1.07278	1.32658	0.101358	0.407707	0.563794	0.116791	Detected	Detected	Detected	Detected	Detected	Detected	Detected	Detected	Detected	0	0	0	FALSE	A_30_P01020675	chr16:23534663-23535172_F										lincRNA:chr16:23534663-23535172 forward strand	chr16:23534806-23534865	mm|16qB1
891	A_30_P01020677	4.89551	4.12085	3.69273	2.84665	1.68246	1.48547	1.11667	1.53868	1.42947	4.23636	2.00486	1.36161	0.47325	0.679155	-1.07933	-0.558187	0.0437574	0.211233	Detected	Detected	Detected	Detected	Detected	Detected	Detected	Detected	Detected	0	0	0	FALSE	A_30_P01020677	chr19:5771425-5848475_F										lincRNA:chr19:5771425-5848475 forward strand	chr19:5844965-5845024	mm|19qA
892	A_30_P01020685	0.0103114	0.00879429	0.00891236	0.0192323	0.0253683	0.0238888	0.019029	0.0220184	0.0161762	0.00933936	0.0228298	0.0190745	2.44447	0.835509	1.28952	-0.259273	0.00194694	0.214373	Not Detected	Not Detected	Not Detected	Not Detected	Not Detected	Not Detected	Not Detected	Not Detected	Not Detected	3	3	3	FALSE	A_30_P01020685	chr4:116791819-116798263_R										lincRNA:chr4:116791819-116798263 reverse strand	chr4:116797214-116797155	mm|4qD1
893	A_30_P01020687	0.0230376	0.0156204	0.0153454	0.0374519	0.0248503	0.0237095	0.0186927	0.0215936	0.0157827	0.0180011	0.0286706	0.0186896	1.59271	0.651876	0.671482	-0.617331	0.0791782	0.0851676	Not Detected	Not Detected	Not Detected	Not Detected	Not Detected	Not Detected	Not Detected	Not Detected	Not Detected	3	3	3	FALSE	A_30_P01020687	chr9:35112668-35113346_F										lincRNA:chr9:35112668-35113346 forward strand	chr9:35112669-35112728	mm|9qA4
894	A_30_P01020689	0.00957914	0.0081835	0.0082605	0.0175575	0.0233968	0.0221705	0.0175713	0.0204373	0.0151678	0.00867438	0.0210416	0.0177255	2.42572	0.842401	1.27841	-0.247421	0.00250462	0.236644	Not Detected	Not Detected	Not Detected	Not Detected	Not Detected	Not Detected	Not Detected	Not Detected	Not Detected	3	3	3	FALSE	A_30_P01020689	chr18:82934418-82935002_F										lincRNA:chr18:82934418-82935002 forward strand	chr18:82934943-82935002	mm|18qE3
895	A_30_P01020692	0.0100205	0.00854238	0.00858151	0.0181874	0.0241054	0.0227689	0.0180579	0.0208349	0.0155628	0.00904814	0.0216872	0.0181519	2.39687	0.836985	1.26115	-0.256726	0.00222294	0.213673	Not Detected	Not Detected	Not Detected	Not Detected	Not Detected	Not Detected	Not Detected	Not Detected	Not Detected	3	3	3	FALSE	A_30_P01020692	chr10:62812866-62831016_R										lincRNA:chr10:62812866-62831016 reverse strand	chr10:62829569-62829510	mm|10qB4
896	A_30_P01020694	0.0170761	0.0107491	0.0109022	0.0235959	0.031293	0.0292886	0.0232249	0.0381621	0.0197838	0.0129091	0.0280592	0.027057	2.17359	0.964283	1.12008	-0.0524722	0.0179172	0.76881	Not Detected	Not Detected	Not Detected	Not Detected	Not Detected	Not Detected	Not Detected	Not Detected	Not Detected	3	3	3	FALSE	A_30_P01020694	chr1:38892041-38893543_R										lincRNA:chr1:38892041-38893543 reverse strand	chr1:38892187-38892128	mm|1qB
897	A_30_P01020696	0.0526392	0.0520954	0.0624326	0.109973	0.0790529	0.0760536	0.150317	0.22947	0.0880663	0.0557224	0.0883598	0.155951	1.58571	1.76496	0.665132	0.819634	0.0423856	0.199983	Not Detected	Detected	Detected	Detected	Not Detected	Not Detected	Detected	Detected	Detected	1	2	0	FALSE	A_30_P01020696	chrX:150159252-150181275_R										lincRNA:chrX:150159252-150181275 reverse strand	chrX:150160228-150160169	mm|XqF3
898	A_30_P01020701	0.0121244	0.0102629	0.0103613	0.022509	0.0298566	0.0280945	0.0222035	0.025341	0.0191443	0.0109162	0.02682	0.0222296	2.4569	0.828842	1.29684	-0.270832	0.00192199	0.188357	Not Detected	Not Detected	Not Detected	Not Detected	Not Detected	Not Detected	Not Detected	Not Detected	Not Detected	3	3	3	FALSE	A_30_P01020701	chr13:19611679-19620954_R										lincRNA:chr13:19611679-19620954 reverse strand	chr13:19617951-19617892	mm|13qA2
899	A_30_P01020702	0.0197918	0.0391862	0.0467578	0.0599669	0.0249021	0.0609019	0.0608403	0.0470163	0.0424179	0.0352453	0.0485903	0.0500915	1.37863	1.0309	0.463237	0.0438977	0.481772	0.783352	Not Detected	Not Detected	Detected	Not Detected	Not Detected	Not Detected	Not Detected	Not Detected	Not Detected	2	3	3	FALSE	A_30_P01020702	chr13:21860993-21862345_F										lincRNA:chr13:21860993-21862345 forward strand	chr13:21862285-21862344	mm|13qA3.1
900	A_30_P01020706	0.0134844	0.00960033	0.00970871	0.0531976	0.031606	0.0255728	0.0208013	0.0382672	0.0229891	0.0109311	0.0367922	0.0273525	3.36581	0.743434	1.75096	-0.427724	0.0172998	0.379914	Not Detected	Not Detected	Not Detected	Not Detected	Not Detected	Not Detected	Not Detected	Not Detected	Not Detected	3	3	3	FALSE	A_30_P01020706	chr8:10913790-10928696_R										lincRNA:chr8:10913790-10928696 reverse strand	chr8:10928572-10928513	mm|8qA1.1
901	A_30_P01020712	0.0697549	0.0729936	0.0671406	0.0246305	0.0311054	0.0288143	0.368932	0.0265784	0.0202801	0.0699631	0.0281834	0.138597	0.402833	4.91767	-1.31175	2.29798	0.00260054	0.511651	Detected	Detected	Detected	Not Detected	Not Detected	Not Detected	Detected	Not Detected	Not Detected	0	3	2	FALSE	A_30_P01020712	chr8:74348539-74378200_R										lincRNA:chr8:74348539-74378200 reverse strand	chr8:74354430-74354371	mm|8qB3.3
902	A_30_P01020714	1.12373	0.973552	0.966875	0.820607	0.373	0.403876	0.33003	0.347222	0.448619	1.02139	0.532494	0.37529	0.521345	0.704778	-0.939691	-0.504759	0.0988131	0.367027	Detected	Detected	Detected	Detected	Detected	Detected	Detected	Detected	Detected	0	0	0	FALSE	A_30_P01020714	chr5:75389503-75396250_R										lincRNA:chr5:75389503-75396250 reverse strand	chr5:75395915-75395856	mm|5qC3.3
903	A_30_P01020716	0.0115645	0.00973713	0.00984696	0.0213714	0.0283222	0.0263931	0.0294782	0.0244274	0.0183215	0.0103829	0.0253623	0.0240757	2.4427	0.949272	1.28848	-0.0751061	0.00175516	0.717921	Not Detected	Not Detected	Not Detected	Not Detected	Not Detected	Not Detected	Not Detected	Not Detected	Not Detected	3	3	3	FALSE	A_30_P01020716	chr15:83181291-83197750_R										lincRNA:chr15:83181291-83197750 reverse strand	chr15:83188021-83187962	mm|15qE1
904	A_30_P01020719	1.91742	1.77821	2.06285	3.10685	2.78124	2.92371	3.69998	3.42131	2.6115	1.91949	2.93727	3.24426	1.53023	1.10452	0.613748	0.143416	0.00184864	0.490041	Detected	Detected	Detected	Detected	Detected	Detected	Detected	Detected	Detected	0	0	0	FALSE	A_30_P01020719	chr17:29374758-29387733_F										lincRNA:chr17:29374758-29387733 forward strand
905	A_30_P01020720	13.5324	13.9129	13.988	21.4633	36.9917	34.9248	34.4166	36.2283	35.7502	13.8111	31.1266	35.465	2.25373	1.13938	1.17232	0.18825	0.04472	0.456409	Detected	Detected	Detected	Detected	Detected	Detected	Detected	Detected	Detected	0	0	0	FALSE	A_30_P01020720	chr16:32309935-32328234_R										lincRNA:chr16:32309935-32328234 reverse strand	chr16:32326033-32325974	mm|16qB3
906	A_30_P01020723	0.0107038	0.00923014	0.0138002	0.0199447	0.0263213	0.0252624	0.0198987	0.0227761	0.0167716	0.0112447	0.0238428	0.0198155	2.12036	0.831088	1.08431	-0.266927	0.00819036	0.208202	Not Detected	Not Detected	Not Detected	Not Detected	Not Detected	Not Detected	Not Detected	Not Detected	Not Detected	3	3	3	FALSE	A_30_P01020723	chr1:87613025-87631604_F										lincRNA:chr1:87613025-87631604 forward strand	chr1:87614775-87614834	mm|1qC5
907	A_30_P01020725	0.034326	0.030378	0.0387669	0.0780738	0.0364921	0.0265742	0.0572003	0.0861568	0.024715	0.0344903	0.0470467	0.056024	1.36406	1.19082	0.447904	0.251952	0.583228	0.761542	Not Detected	Not Detected	Not Detected	Not Detected	Not Detected	Not Detected	Not Detected	Not Detected	Not Detected	3	3	3	FALSE	A_30_P01020725	chr16:14803358-14819925_R										lincRNA:chr16:14803358-14819925 reverse strand	chr16:14817070-14817011	mm|16qA1
908	A_30_P01020728	0.0102526	0.0112843	0.00881141	0.0189462	0.0252084	0.0236672	0.0187842	0.0219486	0.0228506	0.0101161	0.0226073	0.0211945	2.23478	0.937508	1.16013	-0.0930975	0.00232654	0.598457	Not Detected	Not Detected	Not Detected	Not Detected	Not Detected	Not Detected	Not Detected	Not Detected	Not Detected	3	3	3	FALSE	A_30_P01020728	TSIX										lincRNA:chrX:100626855-100680296 forward strand	chrX:100679738-100679797	mm|XqD
909	A_30_P01020732	0.0121893	0.0102615	0.0103239	0.0223855	0.0297604	0.0290643	0.0268525	0.0630414	0.0192502	0.0109249	0.0270701	0.0363814	2.47784	1.34397	1.30908	0.426502	0.00233848	0.676331	Not Detected	Not Detected	Not Detected	Not Detected	Not Detected	Not Detected	Not Detected	Not Detected	Not Detected	3	3	3	FALSE	A_30_P01020732	chr14:26077008-26277280_R										lincRNA:chr14:26077008-26277280 reverse strand	chr14:26261466-26261407	mm|14qA3
910	A_30_P01020745	0.0746881	0.0843982	0.0619964	0.0186395	0.02494	0.0309111	0.0186643	0.0214	0.0291693	0.0736943	0.0248302	0.0230779	0.336936	0.929426	-1.56946	-0.105588	0.00566439	0.741139	Detected	Detected	Detected	Not Detected	Not Detected	Not Detected	Not Detected	Not Detected	Not Detected	0	3	3	FALSE	A_30_P01020745	chr17:74595885-74597555_R										lincRNA:chr17:74595885-74597555 reverse strand	chr17:74597194-74597135	mm|17qE2
911	A_30_P01020748	3.87137	3.67068	3.89976	2.7274	3.25985	2.79306	3.23759	3.61294	3.44842	3.81394	2.92677	3.43298	0.767388	1.17296	-0.381972	0.230154	0.0304271	0.082074	Detected	Detected	Detected	Detected	Detected	Detected	Detected	Detected	Detected	0	0	0	FALSE	A_30_P01020748	chr18:35975361-35975672_F										lincRNA:chr18:35975361-35975672 forward strand	chr18:35975398-35975457	mm|18qB2
912	A_30_P01020749	0.577109	0.591905	0.598313	0.480904	0.211082	0.199886	0.214488	0.23508	0.278614	0.589109	0.297291	0.242727	0.504645	0.816464	-0.98666	-0.292539	0.11317	0.712809	Detected	Detected	Detected	Detected	Detected	Detected	Detected	Detected	Detected	0	0	0	FALSE	A_30_P01020749	chr17:46989233-46990845_R										lincRNA:chr17:46989233-46990845 reverse strand	chr17:46989644-46989585	mm|17qC
913	A_30_P01020753	0.0124704	0.0105025	0.0241118	0.0229603	0.030598	0.0284616	0.0226417	0.0258942	0.0259119	0.0156949	0.02734	0.024816	1.74196	0.907681	0.800715	-0.139743	0.124374	0.41542	Not Detected	Not Detected	Not Detected	Not Detected	Not Detected	Not Detected	Not Detected	Not Detected	Not Detected	3	3	3	FALSE	A_30_P01020753	chrX:11684504-11685304_F										lincRNA:chrX:11684504-11685304 forward strand	chrX:11684604-11684663	mm|XqA1.1
914	A_30_P01020759	0.0168393	0.0115626	0.00997795	0.0215992	0.0284061	0.0264954	0.0210699	0.0244747	0.0183397	0.0127933	0.0255002	0.0212948	1.99325	0.835082	0.995124	-0.26001	0.0270803	0.197814	Not Detected	Not Detected	Not Detected	Not Detected	Not Detected	Not Detected	Not Detected	Not Detected	Not Detected	3	3	3	FALSE	A_30_P01020759	chr13:103101941-103102362_F										lincRNA:chr13:103101941-103102362 forward strand	chr13:103102234-103102293	mm|13qD1
915	A_30_P01020769	2.84289	2.70731	2.97828	3.43361	4.44764	4.08563	4.40644	4.18344	4.43621	2.84282	3.98896	4.34203	1.40317	1.08851	0.488689	0.122356	0.0360987	0.358041	Detected	Detected	Detected	Detected	Detected	Detected	Detected	Detected	Detected	0	0	0	FALSE	A_30_P01020769	chr19:5771425-5848475_F										lincRNA:chr19:5771425-5848475 forward strand	chr19:5845052-5845111	mm|19qA
916	A_30_P01020772	0.0305865	0.0232951	0.0133582	0.0846296	0.0283164	0.0492382	0.0212705	0.0689551	0.0154684	0.0224133	0.0540614	0.0352313	2.41203	0.651691	1.27025	-0.617741	0.107843	0.383298	Not Detected	Not Detected	Not Detected	Not Detected	Not Detected	Not Detected	Not Detected	Not Detected	Not Detected	3	3	3	FALSE	A_30_P01020772	chr5:136129679-136148860_R										lincRNA:chr5:136129679-136148860 reverse strand	chr5:136131903-136131844	mm|5qG2
917	A_30_P01020774	0.00962936	0.00827153	0.00836076	0.0179076	0.0238335	0.0226492	0.0179928	0.0207016	0.014966	0.00875388	0.0214634	0.0178868	2.45187	0.833363	1.29388	-0.262984	0.0025701	0.227502	Not Detected	Not Detected	Not Detected	Not Detected	Not Detected	Not Detected	Not Detected	Not Detected	Not Detected	3	3	3	FALSE	A_30_P01020774	chr10:69831647-69831983_F										lincRNA:chr10:69831647-69831983 forward strand	chr10:69831803-69831862	mm|10qB5.3
918	A_30_P01020800	3.46553	3.26023	3.43277	3.88952	4.84252	4.554	4.84104	4.70134	6.83991	3.38618	4.42868	5.46076	1.30787	1.23305	0.387218	0.302226	0.0465497	0.240422	Detected	Detected	Detected	Detected	Detected	Detected	Detected	Detected	Detected	0	0	0	FALSE	A_30_P01020800	chr18:47313842-47315840_F										lincRNA:chr18:47313842-47315840 forward strand	chr18:47315368-47315427	mm|18qC
919	A_30_P01020813	0.010613	0.00900368	0.00912414	0.0233958	0.0259147	0.0243279	0.0192178	0.0225853	0.0169346	0.00958028	0.0245461	0.0195792	2.56215	0.79765	1.35736	-0.326172	0.0004313	0.0950517	Not Detected	Not Detected	Not Detected	Not Detected	Not Detected	Not Detected	Not Detected	Not Detected	Not Detected	3	3	3	FALSE	A_30_P01020813	chr7:6108350-6119600_R										lincRNA:chr7:6108350-6119600 reverse strand
920	A_30_P01020819	0.677395	0.706413	0.687806	0.514416	0.922469	0.681159	1.03325	1.11458	0.776112	0.690538	0.706015	0.974648	1.02241	1.38049	0.0319777	0.465183	0.974775	0.179066	Detected	Detected	Detected	Detected	Detected	Detected	Detected	Detected	Detected	0	0	0	FALSE	A_30_P01020819	chr8:122997422-122998001_F										lincRNA:chr8:122997422-122998001 forward strand	chr8:122997862-122997921	mm|8qE1
[truncated: 55,685 more rows]
